# Supplementary material for: The preRC protein ORCA organizes heterochromatin by assembling histone H3 lysine 9 methyltransferases on chromatin
Source: eLife. 2015 Apr 29;4:e06496. doi: 10.7554/eLife.06496 (PMC4442312; doi:10.7554/eLife.06496)
Supplement: Supplementary file 1. — H3K9me3 ChIP-seq peaks in control and ORCA-depleted samples. DOI: http://dx.doi.org/10.7554/eLife.06496.019 [file elife06496s001.xlsx]

## Sheet: Annotation
PeakID	Chr	Start	End	Annotation	Distance to TSS	Gene Name	Ctl_me3	siORCA_me3	Inp_Ctl	Inp_siORCA
MACS_peak_3427	chr8	146064540	146071067	exon	10648	COMMD5	321.635	176.463	35.3914	37.2406
MACS_peak_1136	chr18	107929	108721	promoter-TSS	-740	ROCK1P1	313.805	231.243	93.2668	112.098
MACS_peak_140	chr1	142535440	142539790	Intergenic	175990	ANKRD20A12P	289.713	221.364	94.9323	92.161
MACS_peak_2892	chr7	6730364	6735218	intron	13775	ZNF12	204.787	133.806	36.2242	34.2312		>5 fold siORCA decrease and 10 Normalized read enrichment
MACS_peak_2872	chr7	6689762	6694349	Intergenic	36528	ZNF853	199.366	83.9658	14.5729	16.5514
MACS_peak_743	chr15	20545416	20547916	Intergenic	58669	CHEK2P2	146.964	57.9229	20.8185	24.827
MACS_peak_3426	chr8	146060975	146064249	intron	9709	ZNF7	133.714	54.3308	22.0676	17.3037
MACS_peak_2832	chr7	5103156	5105815	exon	-7206	LOC389458	113.235	80.3736	25.8149	20.6892
MACS_peak_3146	chr8	134535528	134538324	intron	47257	ST3GAL1	110.223	53.4328	19.5694	18.4322
MACS_peak_1397	chr19	39171808	39174036	intron	34655	ACTN4	101.189	44.9015	10.8256	8.27568
MACS_peak_2099	chr22	35211411	35213566	Intergenic	-249642	ISX	91.5516	46.2485	14.9893	19.9369
MACS_peak_2076	chr22	28092926	28095321	Intergenic	103363	MN1	89.1424	31.88	15.4057	16.1752
MACS_peak_2758	chr7	2002330	2004370	intron	-119461	MIR4655	87.3355	36.3702	8.74376	15.0467
MACS_peak_2889	chr7	6725924	6727868	Intergenic	19670	ZNF12	85.5285	41.7584	12.4911	14.2944
MACS_peak_2896	chr7	6743248	6745335	intron	2275	ZNF12	83.7216	34.5741	14.5729	15.0467
MACS_peak_3390	chr8	145826496	145828179	intron	11551	ARHGAP39	75.8915	17.9606	4.99643	9.02802
MACS_peak_2047	chr22	26161620	26163342	intron	24361	MYO18B	75.2892	41.7584	17.4875	16.1752
MACS_peak_1751	chr2	133014239	133016597	promoter-TSS	124	ANKRD30BL	74.6869	23.3488	8.32739	8.27568
MACS_peak_3379	chr8	145790682	145792525	intron	-37145	C8orf82	72.8799	26.9409	12.9075	10.9089
MACS_peak_3428	chr8	146071577	146073645	Intergenic	5840	COMMD5	72.2776	36.3702	14.9893	15.0467
MACS_peak_3309	chr8	143441481	143443220	intron	42193	TSNARE1	70.4707	17.9606	6.66191	7.52335
MACS_peak_1028	chr17	55968811	55970406	intron	11142	CUEDC1	68.6637	30.084	7.49465	15.799
MACS_peak_2054	chr22	26251783	26253386	intron	114464	MYO18B	67.4591	47.1465	14.9893	13.1659
MACS_peak_697	chr14	69382017	69383896	intron	63127	ACTN1	66.2545	27.3899	9.5765	14.2944
MACS_peak_355	chr10	95229225	95230850	intron	12037	MYOF	65.6522	23.3488	7.91102	10.1565
MACS_peak_3385	chr8	145814280	145815778	intron	23859	ARHGAP39	64.4475	17.0626	8.74376	9.78035
MACS_peak_2049	chr22	26187877	26189458	intron	50547	MYO18B	64.4475	31.431	13.7402	15.4229
MACS_peak_3306	chr8	143411570	143413250	intron	72133	TSNARE1	63.2429	17.5116	8.74376	9.02802
MACS_peak_2046	chr22	26160174	26161618	intron	22776	MYO18B	63.2429	31.88	11.242	10.5327
MACS_peak_3018	chr7	73510720	73512284	exon	4016	LIMK1	62.6406	26.4919	6.66191	4.51401
MACS_peak_1077	chr17	70413456	70414896	intron	174767	LINC00673	62.0383	22.8998	11.6583	10.5327
MACS_peak_1857	chr20	45876929	45878310	intron	-69627	LOC100131496	62.0383	23.3488	6.24554	5.26634
MACS_peak_3405	chr8	145924882	145926495	Intergenic	55282	ZNF251	61.436	21.1037	6.24554	5.64251
MACS_peak_715	chr14	73107918	73109391	Intergenic	252155	DPF3	60.8337	31.88	14.9893	9.78035
MACS_peak_1195	chr18	13498519	13499882	intron	39254	MIR5190	60.2313	20.2057	8.74376	9.40418
MACS_peak_1183	chr18	12995024	12996272	intron	4287	CEP192	59.629	23.3488	9.99287	8.65185
MACS_peak_2731	chr7	1431952	1433542	Intergenic	66362	MICALL2	57.8221	19.7566	9.16013	9.78035
MACS_peak_3302	chr8	143406091	143407729	intron	77633	TSNARE1	56.6175	18.4096	7.91102	4.89018
MACS_peak_2759	chr7	2004423	2005898	intron	-121271	MIR4655	56.6175	23.3488	8.32739	10.5327
MACS_peak_2056	chr22	27161814	27163456	Intergenic	109189	MIAT	54.2082	22.4507	11.242	16.9275
MACS_peak_2732	chr7	1433572	1434986	Intergenic	64830	MICALL2	53.0036	15.2665	7.91102	9.40418
MACS_peak_2126	chr22	37889132	37890546	intron	-7361	MFNG	53.0036	20.6547	5.82917	7.89952
MACS_peak_2855	chr7	5477306	5478735	Intergenic	-14843	TNRC18	52.4013	16.1645	7.07828	6.39485
MACS_peak_3137	chr8	131682697	131684225	Intergenic	-227555	ASAP1	52.4013	27.8389	12.0747	18.056
MACS_peak_3478	chr9	37952765	37953861	intron	-48963	SLC25A51	51.1966	19.7566	4.99643	6.01868
MACS_peak_2003	chr21	47579544	47580916	TTS	-4749	FTCD	51.1966	21.1037	1.66548	2.63317
MACS_peak_649	chr14	62032033	62033278	Intergenic	-4603	FLJ22447	50.5943	22.8998	10.8256	13.1659
MACS_peak_2413	chr5	3312108	3313600	Intergenic	223354	LOC285577	50.5943	22.8998	9.16013	9.78035
MACS_peak_2036	chr22	25445637	25446914	intron	22334	KIAA1671	49.992	21.1037	11.242	9.02802
MACS_peak_3489	chr9	66837108	66838209	Intergenic	194414	LOC286297	49.992	21.5527	4.1637	6.77101
MACS_peak_2489	chr5	54725194	54726400	intron	78957	MIR5687	49.3897	13.0214	2.91459	1.88084
MACS_peak_3430	chr8	146074797	146076184	TTS	2961	COMMD5	49.3897	13.9195	7.07828	7.52335
MACS_peak_2328	chr4	49151079	49151549	Intergenic	163049	CWH43	49.3897	28.7369	12.4911	15.0467
MACS_peak_2181	chr22	50714414	50715451	intron	-6153	MAPK11	47.5828	17.0626	3.33096	3.00934
MACS_peak_3154	chr8	135476654	135477934	Intergenic	-133020	ZFAT-AS1	47.5828	18.4096	7.91102	7.14718
MACS_peak_829	chr16	3338858	3340117	exon	6000	ZNF263	47.5828	20.2057	4.1637	4.51401
MACS_peak_2476	chr5	42951111	42952026	Intergenic	67345	LOC648987	46.9804	13.9195	2.49822	2.63317
MACS_peak_688	chr14	68568246	68569263	intron	282258	RAD51B	46.9804	16.1645	7.49465	8.27568
MACS_peak_3363	chr8	144940252	144940859	exon	6879	EPPK1	46.9804	17.0626	11.242	10.5327
MACS_peak_2780	chr7	2252311	2253698	intron	19579	MAD1L1	46.9804	17.9606	7.07828	9.40418
MACS_peak_3224	chr8	140872317	140873648	intron	-157683	KCNK9	46.3781	17.0626	6.66191	5.64251
MACS_peak_1954	chr20	61963287	61964591	Intergenic	28809	CHRNA4	45.7758	16.1645	6.24554	5.64251
MACS_peak_240	chr10	42364659	42365997	Intergenic	498165	LOC441666	45.1735	29.186	10.4092	16.9275
MACS_peak_1667	chr2	90484906	90485586	Intergenic	1362729	LOC654342	44.5712	13.9195	7.07828	5.26634
MACS_peak_411	chr11	46398809	46400128	intron	1516	MIR4688	44.5712	16.1645	2.49822	2.63317
MACS_peak_867	chr16	33293805	33294500	Intergenic	4550	LOC390705	44.5712	20.6547	2.91459	6.39485
MACS_peak_694	chr14	69127564	69128687	Intergenic	132506	ZFP36L1	43.9689	17.0626	7.49465	7.89952
MACS_peak_2080	chr22	28177173	28178389	intron	19705	MN1	43.9689	17.9606	9.16013	10.5327
MACS_peak_2091	chr22	30597945	30599216	Intergenic	44260	LIF	43.9689	22.4507	6.66191	5.64251
MACS_peak_3454	chr8	146215382	146216645	intron	-4238	TMED10P1	43.9689	23.7978	6.24554	6.39485
MACS_peak_2030	chr22	24620122	24621588	intron	20255	GGT5	43.3666	15.7155	8.32739	9.40418
MACS_peak_2738	chr7	1748514	1749663	intron	290	ELFN1	43.3666	27.8389	6.66191	9.40418
MACS_peak_3425	chr8	146058776	146059687	intron	6328	ZNF7	42.7643	11.6744	8.32739	5.26634
MACS_peak_614	chr14	50503584	50504844	Intergenic	-29976	C14orf182	42.7643	18.4096	5.4128	9.40418
MACS_peak_1177	chr18	12776353	12777487	Intergenic	73933	PSMG2	41.5596	13.0214	7.07828	7.14718
MACS_peak_3119	chr8	124888729	124889882	intron	25078	FER1L6	41.5596	19.3076	10.8256	8.65185
MACS_peak_805	chr15	90176400	90177360	intron	21802	KIF7	40.9573	12.5724	3.74733	3.38551
MACS_peak_1666	chr2	90481894	90482528	Intergenic	1365764	LOC654342	40.9573	16.6135	7.07828	7.14718
MACS_peak_2070	chr22	27827192	27828287	Intergenic	369747	MN1	40.9573	20.2057	8.32739	10.5327
MACS_peak_1875	chr20	47598866	47599776	intron	61046	ARFGEF2	40.355	14.3685	5.4128	1.50467
MACS_peak_3479	chr9	38169574	38170674	Intergenic	-100914	SHB	40.355	14.8175	4.99643	6.77101
MACS_peak_2110	chr22	35738995	35740435	intron	8082	MIR3909	40.355	23.3488	9.5765	8.27568
MACS_peak_1631	chr2	71690022	71691147	intron	-3248	DYSF	39.7527	17.9606	4.1637	3.76167
MACS_peak_820	chr16	2811679	2812718	exon	-9597	SRRM2-AS1	39.1504	9.42931	6.66191	6.01868
MACS_peak_2830	chr7	5100920	5101835	intron	-10314	LOC389458	39.1504	21.1037	6.24554	8.27568
MACS_peak_1945	chr20	60891649	60892871	intron	14233	ADRM1	39.1504	25.1448	4.58007	4.89018
MACS_peak_2611	chr6	37621610	37622585	exon	43669	MDGA1	38.5481	8.98029	4.99643	4.13784
MACS_peak_3453	chr8	146214051	146215168	intron	-5642	TMED10P1	38.5481	13.0214	7.49465	6.77101
MACS_peak_3344	chr8	144327660	144328792	promoter-TSS	-765	ZFP41	38.5481	14.3685	9.16013	7.52335
MACS_peak_818	chr16	1785505	1786823	intron	1178	MIR3177	38.5481	15.2665	5.82917	1.1285
MACS_peak_3353	chr8	144732014	144733065	exon	585	ZNF623	38.5481	18.4096	6.24554	4.13784
MACS_peak_651	chr14	62058506	62059646	intron	21818	FLJ22447	38.5481	19.7566	7.49465	7.52335
MACS_peak_268	chr10	43034555	43035669	intron	13168	ZNF37BP	38.5481	20.2057	7.07828	7.14718
MACS_peak_2103	chr22	35285512	35286657	Intergenic	-176046	ISX	38.5481	20.6547	7.49465	10.1565
MACS_peak_1011	chr17	38675020	38676148	Intergenic	-17730	TNS4	37.9457	11.6744	6.66191	5.64251
MACS_peak_3114	chr8	123972082	123973029	intron	82108	DERL1	37.9457	15.7155	4.1637	6.77101
MACS_peak_2908	chr7	30494103	30495198	intron	23743	NOD1	37.9457	18.4096	5.82917	5.26634
MACS_peak_2851	chr7	5472317	5473386	Intergenic	-9674	TNRC18	37.9457	22.0017	7.07828	7.89952
MACS_peak_54	chr1	40927099	40928154	intron	11289	ZNF643	37.3434	10.3273	4.58007	6.01868
MACS_peak_1126	chr17	80698899	80700005	intron	6000	FN3K	37.3434	12.1234	5.4128	2.63317
MACS_peak_1849	chr20	45199962	45201177	intron	-21356	OCSTAMP	37.3434	15.2665	4.1637	6.77101
MACS_peak_2061	chr22	27532408	27533250	Intergenic	479383	MIAT	37.3434	19.3076	9.99287	7.89952
MACS_peak_1914	chr20	56920542	56921530	intron	36265	RAB22A	37.3434	22.4507	6.66191	4.51401
MACS_peak_3303	chr8	143408557	143409526	intron	75502	TSNARE1	36.7411	8.98029	4.99643	4.13784
MACS_peak_2051	chr22	26217878	26218923	intron	80280	MYO18B	36.7411	22.0017	7.07828	7.14718
MACS_peak_652	chr14	62059758	62060818	intron	23030	FLJ22447	36.7411	22.0017	6.24554	7.14718
MACS_peak_3044	chr8	23190899	23191914	intron	-2315	LOC100507156	36.1388	9.42931	2.49822	3.76167
MACS_peak_2774	chr7	2099362	2100484	intron	172660	MAD1L1	36.1388	16.6135	5.82917	7.52335
MACS_peak_3289	chr8	143381264	143382135	intron	101982	LINC00051	36.1388	17.5116	4.1637	3.00934
MACS_peak_2876	chr7	6703400	6704503	Intergenic	42615	ZNF12	35.5365	9.42931	4.99643	4.89018
MACS_peak_2847	chr7	5359708	5360530	intron	37558	SLC29A4	35.5365	10.3273	5.4128	4.13784
MACS_peak_497	chr12	14411737	14412798	Intergenic	-106344	ATF7IP	35.5365	19.3076	8.74376	7.14718
MACS_peak_265	chr10	43013807	43014807	non-coding	33973	ZNF37BP	34.9342	15.7155	7.49465	4.89018
MACS_peak_3107	chr8	122231038	122231920	Intergenic	-407170	SNTB1	34.3319	14.3685	5.82917	5.26634
MACS_peak_809	chr15	91186036	91186786	3' UTR	-74168	BLM	34.3319	14.8175	2.49822	3.38551
MACS_peak_3147	chr8	134539663	134540613	intron	44045	ST3GAL1	34.3319	17.5116	5.82917	7.52335
MACS_peak_2010	chr22	19776178	19777240	intron	32483	TBX1	33.7296	11.2254	4.99643	3.00934
MACS_peak_3198	chr8	140752569	140753714	intron	-37842	KCNK9	33.7296	12.5724	5.82917	5.26634
MACS_peak_51	chr1	40919169	40920228	intron	3361	ZNF643	33.7296	14.3685	4.58007	6.01868
MACS_peak_2760	chr7	2007131	2008184	intron	-123768	MIR4655	33.7296	16.1645	3.74733	4.13784
MACS_peak_1194	chr18	13457550	13458582	intron	-1880	MIR5190	33.1272	11.6744	4.99643	5.26634
MACS_peak_2053	chr22	26250930	26251774	intron	113232	MYO18B	33.1272	12.5724	7.91102	5.64251
MACS_peak_2742	chr7	1768469	1769309	intron	20091	ELFN1	33.1272	15.2665	7.07828	3.00934
MACS_peak_1206	chr18	14747428	14748431	promoter-TSS	-310	ANKRD30B	32.5249	8.98029	2.08185	2.63317
MACS_peak_3370	chr8	145682062	145682882	intron	7946	CYHR1	32.5249	13.0214	5.82917	9.02802
MACS_peak_1643	chr2	87623639	87624048	Intergenic	-131131	LINC00152	32.5249	14.3685	2.49822	3.76167
MACS_peak_1546	chr2	20780919	20781769	Intergenic	69520	HS1BP3	32.5249	16.6135	4.1637	5.26634
MACS_peak_2043	chr22	25742726	25743564	Intergenic	15379	LRP5L	31.9226	12.5724	4.99643	3.76167
MACS_peak_237	chr10	42360915	42361693	Intergenic	502189	LOC441666	31.9226	16.6135	8.74376	7.14718
MACS_peak_1209	chr18	14998516	14999326	Intergenic	168756	MIR3156-2	31.3203	3.59212	2.49822	0.376167
MACS_peak_275	chr10	43857675	43858580	Intergenic	-8965	FXYD4	31.3203	8.08227	2.08185	3.38551
MACS_peak_2883	chr7	6715965	6716878	Intergenic	30145	ZNF12	31.3203	11.6744	5.4128	5.26634
MACS_peak_1123	chr17	80691128	80692005	Intergenic	-1886	FN3K	31.3203	12.5724	3.74733	2.63317
MACS_peak_1189	chr18	13278707	13279482	intron	60308	C18orf1	31.3203	12.5724	4.58007	5.64251
MACS_peak_1883	chr20	49263300	49264063	Intergenic	-10255	FAM65C	31.3203	13.0214	5.4128	5.26634
MACS_peak_3398	chr8	145887182	145888123	Intergenic	-48764	ARHGAP39	31.3203	13.0214	4.58007	6.39485
MACS_peak_2012	chr22	19834375	19835174	3' UTR	7597	C22orf29	31.3203	14.8175	6.66191	6.01868
MACS_peak_3121	chr8	126136663	126137547	intron	33022	NSMCE2	31.3203	16.1645	5.82917	9.02802
MACS_peak_55	chr1	40928439	40929413	exon	12589	ZNF643	31.3203	17.0626	7.91102	3.00934
MACS_peak_2321	chr4	49109294	49110009	Intergenic	121386	CWH43	31.3203	22.4507	7.07828	6.01868
MACS_peak_2064	chr22	27626095	27626815	Intergenic	571031	MN1	31.3203	22.8998	7.07828	12.7897
MACS_peak_1535	chr2	10152713	10153683	Intergenic	-30484	KLF11	30.718	7.63325	2.49822	1.50467
MACS_peak_1297	chr19	29930401	29931363	intron	85777	LOC284395	30.718	10.3273	3.74733	3.76167
MACS_peak_3191	chr8	140742302	140743241	3' UTR	-27472	KCNK9	30.718	11.6744	3.33096	4.13784
MACS_peak_3360	chr8	144923507	144924213	promoter-TSS	-714	NRBP2	30.718	12.1234	2.49822	5.26634
MACS_peak_594	chr13	114001673	114002491	intron	16381	GRTP1	30.718	12.5724	2.91459	1.1285
MACS_peak_339	chr10	79710586	79711343	Intergenic	24394	LOC100128292	30.718	13.0214	4.1637	4.51401
MACS_peak_2460	chr5	36481544	36482378	Intergenic	-124496	SLC1A3	30.718	13.0214	3.33096	4.89018
MACS_peak_2326	chr4	49122750	49123246	Intergenic	134733	CWH43	30.718	21.5527	6.66191	9.40418
MACS_peak_473	chr12	1609694	1610522	intron	451	LOC100292680	30.1157	5.83719	4.58007	3.76167
MACS_peak_972	chr16	89974211	89975081	intron	-9641	MC1R	30.1157	7.63325	1.66548	3.38551
MACS_peak_2112	chr22	35828205	35829242	Intergenic	32607	MCM5	30.1157	8.53128	4.99643	3.00934
MACS_peak_3439	chr8	146158614	146159575	intron	17180	ZNF16	30.1157	9.87832	4.1637	3.76167
MACS_peak_1315	chr19	30894953	30895888	intron	32092	ZNF536	30.1157	12.1234	6.24554	8.27568
MACS_peak_691	chr14	68616307	68617208	intron	330261	RAD51B	30.1157	14.8175	7.07828	7.52335
MACS_peak_2325	chr4	49122006	49122450	Intergenic	133963	CWH43	30.1157	15.2665	6.66191	5.26634
MACS_peak_2057	chr22	27203026	27203848	Intergenic	149991	MIAT	30.1157	17.5116	8.74376	8.27568
MACS_peak_235	chr10	42357249	42357995	Intergenic	505871	LOC441666	30.1157	17.9606	8.74376	9.40418
MACS_peak_2698	chr7	302195	303005	Intergenic	-27536	LOC100288524	29.5134	9.42931	2.08185	1.50467
MACS_peak_2825	chr7	5089368	5090194	intron	4228	RBAK	29.5134	9.42931	6.24554	5.64251
MACS_peak_2605	chr6	36165353	36166176	intron	1214	BRPF3	29.5134	10.7764	6.24554	6.39485
MACS_peak_3547	chr9	138806312	138807332	Intergenic	-7817	CAMSAP1	29.5134	10.7764	3.33096	3.76167
MACS_peak_2863	chr7	6159927	6160685	intron	15756	USP42	29.5134	12.5724	6.66191	6.39485
MACS_peak_290	chr10	44139449	44140101	exon	455	ZNF32-AS1	29.5134	13.4704	5.82917	1.1285
MACS_peak_1182	chr18	12994099	12994991	intron	3184	CEP192	29.5134	15.2665	7.49465	7.89952
MACS_peak_2837	chr7	5134007	5134989	Intergenic	22807	LOC389458	29.5134	17.5116	7.07828	7.52335
MACS_peak_2037	chr22	25446926	25447467	intron	23255	KIAA1671	28.911	11.2254	4.1637	4.51401
MACS_peak_3393	chr8	145839575	145840379	Intergenic	-1089	ARHGAP39	28.911	11.6744	4.58007	7.52335
MACS_peak_2288	chr4	30332490	30333396	Intergenic	-389087	PCDH7	28.911	11.6744	5.4128	9.02802
MACS_peak_3424	chr8	146057834	146058507	intron	5267	ZNF7	28.911	12.1234	4.99643	3.38551
MACS_peak_53	chr1	40925843	40926659	intron	9914	ZNF643	28.911	12.1234	2.91459	3.76167
MACS_peak_2893	chr7	6738680	6739476	intron	7488	ZNF12	28.911	13.0214	6.66191	4.13784
MACS_peak_2854	chr7	5476197	5477081	Intergenic	-13462	TNRC18	28.911	13.4704	6.24554	7.14718
MACS_peak_3332	chr8	143931308	143932194	Intergenic	15534	GML	28.911	13.9195	3.33096	8.65185
MACS_peak_2062	chr22	27617674	27618415	Intergenic	564598	MIAT	28.911	16.6135	5.4128	10.9089
MACS_peak_3143	chr8	133913132	133913850	intron	34286	TG	28.911	16.6135	3.74733	5.26634
MACS_peak_2891	chr7	6728588	6729485	3' UTR	17530	ZNF12	28.911	17.5116	7.91102	4.89018
MACS_peak_3436	chr8	146155417	146156394	3' UTR	20369	ZNF16	28.911	19.3076	4.99643	5.26634
MACS_peak_1503	chr19	58514867	58515761	promoter-TSS	-600	ZNF606	28.3087	8.08227	2.49822	2.63317
MACS_peak_1142	chr18	661531	662267	intron	-3559	C18orf56	28.3087	8.98029	2.91459	3.76167
MACS_peak_1042	chr17	59528878	59529660	Intergenic	-4538	TBX4	28.3087	9.42931	2.91459	2.257
MACS_peak_3415	chr8	145939145	145940026	Intergenic	41385	ZNF251	28.3087	10.3273	3.74733	5.64251
MACS_peak_2138	chr22	43249961	43250783	intron	3036	ARFGAP3	28.3087	10.7764	2.91459	3.38551
MACS_peak_714	chr14	73105715	73106578	Intergenic	254663	DPF3	28.3087	13.4704	9.16013	5.26634
MACS_peak_2457	chr5	35919995	35920953	intron	18263	CAPSL	28.3087	16.6135	7.49465	4.51401
MACS_peak_116	chr1	110329813	110330714	Intergenic	-23619	EPS8L3	27.7064	7.63325	2.91459	2.257
MACS_peak_2073	chr22	28062247	28062926	Intergenic	134900	MN1	27.7064	9.42931	8.74376	5.26634
MACS_peak_1049	chr17	60083941	60084726	intron	58310	MED13	27.7064	13.0214	2.91459	4.89018
MACS_peak_2330	chr4	49156272	49157062	Intergenic	168402	CWH43	27.7064	13.9195	7.91102	8.27568
MACS_peak_327	chr10	75624469	75625225	intron	9502	CAMK2G	27.1041	5.83719	4.1637	3.38551
MACS_peak_2465	chr5	37774402	37774992	Intergenic	60896	GDNF	27.1041	7.18424	4.58007	3.38551
MACS_peak_1958	chr20	62063027	62063837	intron	40561	KCNQ2	27.1041	7.63325	4.1637	3.38551
MACS_peak_1100	chr17	75133982	75134671	intron	-2679	SEC14L1	27.1041	8.53128	2.49822	2.257
MACS_peak_2171	chr22	49777977	49778733	Intergenic	272835	C22orf34	27.1041	8.98029	3.74733	5.26634
MACS_peak_2762	chr7	2017345	2018148	intron	-133857	MIR4655	27.1041	8.98029	4.1637	2.257
MACS_peak_259	chr10	42836304	42837130	intron	26776	LOC441666	27.1041	9.87832	4.1637	1.88084
MACS_peak_1148	chr18	3757127	3757944	intron	87823	DLGAP1	27.1041	9.87832	7.49465	7.52335
MACS_peak_1419	chr19	44373258	44374126	Intergenic	10596	ZNF404	27.1041	10.7764	6.66191	4.51401
MACS_peak_175	chr1	230218240	230219245	intron	15786	GALNT2	27.1041	12.5724	5.4128	3.76167
MACS_peak_924	chr16	72983932	72984747	intron	97935	ZFHX3	27.1041	13.0214	1.66548	1.1285
MACS_peak_1254	chr19	970535	971380	intron	-13371	WDR18	27.1041	13.4704	1.66548	2.63317
MACS_peak_2038	chr22	25519391	25520261	intron	-11167	LOC100128531	27.1041	21.1037	7.49465	9.40418
MACS_peak_1337	chr19	36943629	36944499	intron	31988	LOC644189	26.5018	6.73522	2.49822	1.88084
MACS_peak_1044	chr17	59532574	59533311	promoter-TSS	-865	TBX4	26.5018	7.63325	2.49822	4.89018
MACS_peak_1820	chr20	29861769	29862712	Intergenic	16773	DEFB115	26.5018	7.63325	5.82917	4.13784
MACS_peak_1515	chr19	58705710	58706428	intron	11673	ZNF274	26.5018	8.08227	0.41637	1.1285
MACS_peak_3311	chr8	143444361	143445277	intron	39724	TSNARE1	26.5018	8.08227	7.07828	3.00934
MACS_peak_720	chr14	73244622	73245368	intron	115814	DPF3	26.5018	9.87832	6.66191	4.51401
MACS_peak_3178	chr8	140002623	140003409	Intergenic	-76780	COL22A1	26.5018	10.7764	4.1637	4.13784
MACS_peak_3093	chr8	117961767	117962546	promoter-TSS	-356	SLC30A8	25.8995	4.93916	3.74733	3.38551
MACS_peak_3438	chr8	146157820	146158437	intron	18146	ZNF16	25.8995	6.28621	3.74733	4.51401
MACS_peak_1584	chr2	38303663	38304451	promoter-TSS	-734	CYP1B1	25.8995	8.08227	4.1637	1.88084
MACS_peak_664	chr14	65006765	65007564	promoter-TSS	-22	HSPA2	25.8995	8.53128	3.33096	5.26634
MACS_peak_3505	chr9	95852904	95853771	Intergenic	-5113	C9orf89	25.8995	9.42931	6.24554	4.51401
MACS_peak_673	chr14	65861639	65862552	Intergenic	-15215	FUT8	25.8995	12.5724	4.99643	5.64251
MACS_peak_706	chr14	71410517	71411294	intron	36783	PCNX	25.2972	5.83719	2.91459	3.00934
MACS_peak_2071	chr22	27887795	27888487	Intergenic	309345	MN1	25.2972	8.08227	4.99643	6.01868
MACS_peak_214	chr10	31058176	31058929	Intergenic	-139905	LYZL2	25.2972	8.98029	1.66548	1.50467
MACS_peak_2567	chr5	178012411	178012906	intron	4898	COL23A1	25.2972	9.42931	4.99643	4.13784
MACS_peak_3327	chr8	143857860	143858720	intron	147	LYNX1	25.2972	9.42931	2.49822	5.64251
MACS_peak_1099	chr17	75132950	75133572	intron	-3744	SEC14L1	25.2972	10.3273	2.08185	4.13784
MACS_peak_3449	chr8	146204704	146205536	intron	-15131	TMED10P1	25.2972	11.2254	5.82917	3.76167
MACS_peak_1605	chr2	47997672	47998372	Intergenic	-12199	MSH6	25.2972	11.6744	5.82917	3.76167
MACS_peak_2093	chr22	31368673	31369379	non-coding	3392	TUG1	25.2972	12.5724	2.49822	3.76167
MACS_peak_601	chr14	19109357	19110217	Intergenic	-267807	OR11H12	25.2972	12.5724	3.33096	4.51401
MACS_peak_156	chr1	172605381	172606229	Intergenic	-22380	FASLG	25.2972	14.8175	2.91459	6.01868
MACS_peak_1047	chr17	60081140	60081972	intron	61087	MED13	25.2972	15.7155	5.82917	7.89952
MACS_peak_3447	chr8	146202602	146203396	non-coding	-17252	TMED10P1	25.2972	19.3076	5.82917	6.39485
MACS_peak_1519	chr19	58722204	58723004	intron	-17466	ZNF544	24.6949	4.93916	0.832739	0.752335
MACS_peak_2442	chr5	18551627	18552378	Intergenic	-1164583	LOC401177	24.6949	4.93916	2.08185	3.00934
MACS_peak_1828	chr20	33583444	33584095	intron	-5494	MIR499B	24.6949	5.83719	3.33096	2.257
MACS_peak_3322	chr8	143527720	143528547	Intergenic	-17244	BAI1	24.6949	6.73522	5.4128	4.51401
MACS_peak_3423	chr8	146054120	146054980	intron	1647	ZNF7	24.6949	8.08227	5.82917	7.89952
MACS_peak_2420	chr5	7850892	7851532	5' UTR	391	C5orf49	24.6949	8.53128	2.08185	3.00934
MACS_peak_3399	chr8	145888748	145889500	Intergenic	-50236	ARHGAP39	24.6949	8.53128	2.49822	3.00934
MACS_peak_597	chr13	114511421	114512189	intron	-6778	GAS6-AS1	24.6949	8.98029	0.832739	3.00934
MACS_peak_975	chr16	90063171	90064054	TTS	12917	DBNDD1	24.6949	10.3273	2.08185	4.13784
MACS_peak_120	chr1	110469501	110470227	TTS	16631	CSF1	24.6949	10.3273	1.24911	4.13784
MACS_peak_285	chr10	44052097	44052737	exon	11490	ZNF239	24.6949	13.0214	2.91459	3.76167
MACS_peak_2100	chr22	35239830	35240471	Intergenic	-221980	ISX	24.6949	13.0214	4.99643	8.65185
MACS_peak_841	chr16	3367256	3368122	exon	-12250	TIGD7	24.6949	17.5116	7.07828	7.14718
MACS_peak_2009	chr22	19753823	19754571	exon	9971	TBX1	24.0925	3.59212	1.66548	2.257
MACS_peak_2296	chr4	36376313	36377024	Intergenic	91024	DTHD1	24.0925	4.49015	1.66548	2.257
MACS_peak_284	chr10	44047852	44048614	Intergenic	15674	ZNF239	24.0925	6.28621	5.82917	3.76167
MACS_peak_1229	chr18	76414734	76415616	Intergenic	-325100	SALL3	24.0925	6.28621	1.24911	1.88084
MACS_peak_3408	chr8	145930690	145931422	Intergenic	49914	ZNF251	24.0925	7.18424	3.74733	3.38551
MACS_peak_2812	chr7	4539031	4539844	Intergenic	-182493	FOXK1	24.0925	7.18424	6.24554	3.76167
MACS_peak_3368	chr8	145622344	145622915	Intergenic	2930	MIR1234	24.0925	7.63325	2.08185	3.00934
MACS_peak_3145	chr8	134386873	134387544	Intergenic	-77661	NDRG1	24.0925	7.63325	2.91459	8.65185
MACS_peak_366	chr10	115473769	115474508	intron	5034	CASP7	24.0925	8.08227	4.1637	2.257
MACS_peak_2751	chr7	1911601	1912365	intron	-28094	MIR4655	24.0925	8.53128	3.74733	2.257
MACS_peak_1788	chr2	237549296	237549969	Intergenic	71252	CXCR7	24.0925	9.42931	3.74733	2.257
MACS_peak_1036	chr17	58569305	58570021	intron	33917	APPBP2	24.0925	10.3273	4.58007	4.89018
MACS_peak_1012	chr17	39296062	39296752	exon	332	KRTAP4-6	24.0925	12.1234	3.33096	3.38551
MACS_peak_1045	chr17	59533338	59534183	promoter-TSS	-47	TBX4	24.0925	12.5724	2.91459	3.38551
MACS_peak_2309	chr4	41689704	41690512	intron	60879	PHOX2B	24.0925	12.5724	5.82917	5.26634
MACS_peak_2234	chr3	75718305	75718660	Intergenic	-2950	LOC401074	24.0925	13.0214	6.24554	6.39485
MACS_peak_2885	chr7	6721023	6721869	Intergenic	25120	ZNF12	24.0925	13.4704	4.58007	7.14718
MACS_peak_637	chr14	59369543	59370280	Intergenic	264356	DACT1	23.4902	4.04113	4.1637	2.63317
MACS_peak_2684	chr6	170475772	170476364	Intergenic	95589	LOC154449	23.4902	5.38818	1.24911	3.76167
MACS_peak_3526	chr9	132276233	132276923	TTS	25639	LOC100506190	23.4902	6.28621	2.08185	2.63317
MACS_peak_612	chr14	50492172	50492943	Intergenic	-18319	C14orf182	23.4902	6.73522	4.99643	5.64251
MACS_peak_521	chr12	50287654	50288462	intron	9702	FAIM2	23.4902	6.73522	0.41637	5.26634
MACS_peak_2218	chr3	44573865	44574558	Intergenic	-22502	ZNF167	23.4902	7.18424	3.74733	5.64251
MACS_peak_3291	chr8	143383705	143384420	intron	100481	TSNARE1	23.4902	7.18424	4.58007	3.00934
MACS_peak_2291	chr4	30722503	30723243	5' UTR	836	PCDH7	23.4902	7.63325	5.4128	6.77101
MACS_peak_1010	chr17	38634292	38634988	intron	23214	TNS4	23.4902	7.63325	2.49822	2.63317
MACS_peak_2466	chr5	37775070	37775748	Intergenic	60184	GDNF	23.4902	8.53128	5.4128	3.76167
MACS_peak_386	chr11	189514	190161	Intergenic	-3243	LOC653486	23.4902	10.3273	2.91459	2.257
MACS_peak_787	chr15	68648651	68649442	intron	75446	ITGA11	23.4902	10.3273	2.91459	4.89018
MACS_peak_1694	chr2	100281312	100282008	intron	-175180	REV1	23.4902	12.1234	6.24554	2.257
MACS_peak_974	chr16	90060550	90061338	intron	15585	DBNDD1	23.4902	14.8175	4.99643	6.01868
MACS_peak_2581	chr5	179684025	179684788	intron	34665	MAPK9	23.4902	15.2665	0.832739	1.88084
MACS_peak_647	chr14	61610457	61611228	Intergenic	137688	TMEM30B	23.4902	15.7155	6.66191	6.01868
MACS_peak_2858	chr7	5567386	5568212	exon	2433	ACTB	22.8879	5.38818	4.99643	6.39485
MACS_peak_2253	chr3	120060498	120061112	intron	7381	LRRC58	22.8879	5.38818	0.832739	1.1285
MACS_peak_2048	chr22	26164067	26164837	exon	26332	MYO18B	22.8879	6.28621	3.33096	4.89018
MACS_peak_1040	chr17	59476178	59476995	promoter-TSS	-671	TBX2	22.8879	6.73522	4.1637	6.39485
MACS_peak_2184	chr22	50720091	50720805	exon	-11669	MAPK11	22.8879	6.73522	2.91459	3.00934
MACS_peak_1847	chr20	45174180	45174997	exon	4625	OCSTAMP	22.8879	7.18424	4.58007	5.26634
MACS_peak_970	chr16	89934513	89935282	intron	-5097	TCF25	22.8879	7.18424	2.91459	3.00934
MACS_peak_3414	chr8	145937987	145938577	Intergenic	42688	ZNF251	22.8879	8.08227	4.1637	5.26634
MACS_peak_2034	chr22	25302234	25302928	intron	32733	TMEM211	22.8879	8.53128	5.82917	9.02802
MACS_peak_3308	chr8	143414559	143415374	intron	69577	TSNARE1	22.8879	8.98029	3.74733	3.76167
MACS_peak_1891	chr20	50673548	50674324	Intergenic	134588	ZFP64	22.8879	8.98029	6.66191	4.89018
MACS_peak_3065	chr8	81931347	81932096	intron	92582	PAG1	22.8879	9.42931	4.1637	4.13784
MACS_peak_2687	chr7	205121	205899	intron	12541	FAM20C	22.8879	10.7764	2.49822	2.63317
MACS_peak_853	chr16	11301228	11301912	Intergenic	48469	SOCS1	22.8879	10.7764	2.08185	1.50467
MACS_peak_1032	chr17	57836372	57836934	intron	51790	VMP1	22.8879	11.2254	6.24554	3.76167
MACS_peak_1874	chr20	47367284	47367937	intron	76810	PREX1	22.8879	12.1234	2.91459	1.88084
MACS_peak_1968	chr21	11118946	11119737	Intergenic	-20404	BAGE	22.8879	20.6547	6.66191	7.14718
MACS_peak_1858	chr20	46055288	46055882	Intergenic	-70111	ZMYND8	22.2856	4.93916	4.1637	3.00934
MACS_peak_2247	chr3	107810045	107810643	promoter-TSS	-409	CD47	22.2856	6.73522	2.49822	3.38551
MACS_peak_1879	chr20	47826270	47826918	Intergenic	-9238	DDX27	22.2856	7.18424	2.49822	6.01868
MACS_peak_3367	chr8	145010770	145011412	intron	2667	PLEC	22.2856	7.18424	5.82917	4.51401
MACS_peak_3297	chr8	143396618	143397259	intron	87605	TSNARE1	22.2856	7.63325	1.66548	2.63317
MACS_peak_1796	chr2	239940259	239941026	Intergenic	49968	MIR4440	22.2856	7.63325	3.74733	1.1285
MACS_peak_498	chr12	14412800	14413325	Intergenic	-105549	ATF7IP	22.2856	7.63325	5.82917	1.88084
MACS_peak_665	chr14	65007783	65008525	exon	968	HSPA2	22.2856	8.98029	2.08185	3.00934
MACS_peak_916	chr16	70814996	70815703	intron	19712	VAC14	22.2856	8.98029	2.08185	2.257
MACS_peak_385	chr10	135500797	135501170	Intergenic	7323	DUX2	22.2856	8.98029	4.99643	9.02802
MACS_peak_3128	chr8	127726769	127727573	Intergenic	-156460	FAM84B	22.2856	9.87832	4.58007	4.51401
MACS_peak_238	chr10	42361756	42362552	Intergenic	501339	LOC441666	22.2856	10.3273	6.24554	4.51401
MACS_peak_3100	chr8	119853278	119853995	Intergenic	110747	TNFRSF11B	22.2856	10.3273	3.74733	3.76167
MACS_peak_1618	chr2	61016867	61017579	intron	33858	PAPOLG	22.2856	10.3273	0.832739	4.13784
MACS_peak_3151	chr8	135296270	135297087	Intergenic	-313636	ZFAT-AS1	22.2856	10.7764	4.1637	6.77101
MACS_peak_2133	chr22	40353887	40354465	intron	-36777	FAM83F	22.2856	11.6744	3.33096	3.76167
MACS_peak_2058	chr22	27213663	27214382	Intergenic	160576	MIAT	22.2856	11.6744	4.58007	4.51401
MACS_peak_3281	chr8	143164588	143165308	Intergenic	-92752	MIR4472-1	22.2856	11.6744	2.49822	5.26634
MACS_peak_1658	chr2	89866441	89867242	Intergenic	754957	MIR4436A	22.2856	12.1234	5.82917	7.52335
MACS_peak_3437	chr8	146156604	146157237	exon	19354	ZNF16	22.2856	12.5724	4.1637	3.76167
MACS_peak_2488	chr5	54718652	54719381	intron	85738	MIR5687	22.2856	13.0214	4.1637	3.38551
MACS_peak_438	chr11	74382562	74383279	Intergenic	48462	MIR4696	22.2856	14.8175	2.91459	2.257
MACS_peak_1025	chr17	55547102	55547641	intron	212997	MSI2	21.6833	5.38818	0.41637	2.63317
MACS_peak_3403	chr8	145899617	145900392	Intergenic	-61116	ARHGAP39	21.6833	5.38818	3.74733	5.64251
MACS_peak_1256	chr19	2312931	2313503	Intergenic	-5061	LINGO3	21.6833	6.28621	0.832739	0.376167
MACS_peak_1589	chr2	42327832	42328529	Intergenic	53019	PKDCC	21.6833	6.28621	2.08185	1.50467
MACS_peak_1140	chr18	654042	654702	intron	-3232	TYMS	21.6833	6.73522	2.49822	5.26634
MACS_peak_3299	chr8	143398780	143399565	intron	85371	TSNARE1	21.6833	6.73522	0.41637	4.13784
MACS_peak_646	chr14	61580481	61581288	Intergenic	132919	SLC38A6	21.6833	6.73522	4.58007	6.01868
MACS_peak_1832	chr20	36869879	36870612	exon	18929	KIAA1755	21.6833	6.73522	4.1637	4.13784
MACS_peak_234	chr10	42356715	42357215	Intergenic	506528	LOC441666	21.6833	7.63325	3.74733	6.39485
MACS_peak_2239	chr3	93763028	93763694	intron	-15907	STX19	21.6833	8.53128	2.91459	1.50467
MACS_peak_2869	chr7	6679858	6680590	Intergenic	24697	ZNF853	21.6833	8.53128	3.33096	4.51401
MACS_peak_746	chr15	20550421	20551100	Intergenic	62763	CHEK2P2	21.6833	8.53128	2.08185	4.13784
MACS_peak_2846	chr7	5358804	5359488	intron	36585	SLC29A4	21.6833	8.53128	2.08185	3.00934
MACS_peak_2852	chr7	5474834	5475529	Intergenic	-12004	TNRC18	21.6833	9.42931	4.58007	3.76167
MACS_peak_3247	chr8	141620287	141621048	intron	24979	EIF2C2	21.6833	9.42931	3.74733	4.51401
MACS_peak_2059	chr22	27410131	27410905	Intergenic	357072	MIAT	21.6833	9.87832	2.91459	4.51401
MACS_peak_750	chr15	22460946	22461575	Intergenic	47798	OR4N3P	21.6833	10.3273	2.08185	2.257
MACS_peak_25	chr1	22255439	22256067	intron	7997	HSPG2	21.6833	10.3273	2.08185	3.00934
MACS_peak_1814	chr20	17639301	17640060	intron	23248	RRBP1	21.6833	10.7764	0.832739	2.257
MACS_peak_2844	chr7	5334956	5335553	intron	12693	SLC29A4	21.081	3.59212	2.08185	1.50467
MACS_peak_287	chr10	44109306	44109843	intron	7719	ZNF485	21.081	4.04113	3.33096	4.51401
MACS_peak_2859	chr7	5568675	5569293	exon	1248	ACTB	21.081	5.38818	6.66191	3.00934
MACS_peak_581	chr13	112337445	112338214	Intergenic	364814	TEX29	21.081	5.38818	4.58007	3.76167
MACS_peak_1181	chr18	12948783	12949360	intron	1088	SEH1L	21.081	5.83719	4.58007	3.00934
MACS_peak_2886	chr7	6723944	6724515	Intergenic	22337	ZNF12	21.081	5.83719	3.33096	5.26634
MACS_peak_3168	chr8	136802604	136803411	Intergenic	333291	KHDRBS3	21.081	5.83719	2.91459	3.76167
MACS_peak_1055	chr17	60643904	60644636	intron	-60492	MRC2	21.081	5.83719	5.4128	7.52335
MACS_peak_2725	chr7	1061406	1061992	TTS	963	MIR339	21.081	6.28621	1.24911	1.1285
MACS_peak_1911	chr20	56685000	56685725	Intergenic	-40621	C20orf85	21.081	6.28621	2.08185	3.76167
MACS_peak_133	chr1	116210425	116211134	intron	25529	VANGL1	21.081	6.28621	5.4128	4.13784
MACS_peak_1180	chr18	12911984	12912775	Intergenic	-28045	PTPN2	21.081	6.73522	3.33096	4.13784
MACS_peak_2826	chr7	5092290	5092844	intron	7014	RBAK	21.081	7.18424	3.74733	3.76167
MACS_peak_1541	chr2	11240805	11241447	intron	31176	FLJ33534	21.081	7.63325	4.99643	3.00934
MACS_peak_408	chr11	27709254	27709972	intron	11601	BDNF	21.081	7.63325	2.91459	3.38551
MACS_peak_1512	chr19	58695593	58696205	intron	1503	ZNF274	21.081	8.53128	1.24911	1.88084
MACS_peak_3097	chr8	118780823	118781367	Intergenic	248130	MED30	21.081	8.53128	2.91459	3.00934
MACS_peak_3094	chr8	118279511	118280202	Intergenic	132519	SLC30A8	21.081	8.53128	2.49822	3.00934
MACS_peak_2033	chr22	25119515	25120113	intron	-40654	TOP1P2	21.081	8.98029	6.66191	4.89018
MACS_peak_222	chr10	33509448	33509960	intron	114129	NRP1	21.081	8.98029	2.91459	2.257
MACS_peak_2921	chr7	35704727	35705427	intron	29695	HERPUD2	21.081	8.98029	2.08185	3.38551
MACS_peak_2639	chr6	57546407	57547028	Intergenic	364295	PRIM2	21.081	9.42931	2.08185	2.63317
MACS_peak_2372	chr4	84542418	84543082	Intergenic	85280	AGPAT9	21.081	9.42931	2.91459	3.76167
MACS_peak_402	chr11	12225490	12226074	intron	-82665	MICALCL	21.081	10.3273	3.33096	3.00934
MACS_peak_1601	chr2	46958224	46958891	intron	32208	SOCS5	21.081	10.7764	5.4128	4.13784
MACS_peak_2735	chr7	1628480	1629078	non-coding	19070	KIAA1908	21.081	12.1234	4.99643	2.63317
MACS_peak_2039	chr22	25533702	25534411	intron	-25397	LOC100128531	21.081	12.5724	6.66191	9.78035
MACS_peak_289	chr10	44112044	44112750	exon	10542	ZNF485	21.081	13.0214	4.58007	7.52335
MACS_peak_2721	chr7	750583	751303	intron	1218	PRKAR1B	20.4787	3.59212	2.08185	0.752335
MACS_peak_1789	chr2	237575439	237576199	Intergenic	97439	CXCR7	20.4787	4.49015	2.91459	4.13784
MACS_peak_2624	chr6	43922000	43922633	Intergenic	-46021	C6orf223	20.4787	4.93916	4.58007	1.50467
MACS_peak_635	chr14	59154040	59154650	Intergenic	48790	DACT1	20.4787	5.38818	2.91459	4.13784
MACS_peak_3539	chr9	137290812	137291535	intron	19916	MIR4669	20.4787	6.28621	0.41637	1.88084
MACS_peak_2871	chr7	6689052	6689712	Intergenic	33855	ZNF853	20.4787	6.28621	3.74733	2.63317
MACS_peak_3111	chr8	123643414	123644062	Intergenic	-150163	ZHX2	20.4787	6.28621	5.4128	7.52335
MACS_peak_1947	chr20	61142994	61143722	non-coding	-4302	C20orf166	20.4787	6.73522	3.33096	1.88084
MACS_peak_2752	chr7	1912507	1913122	intron	-28925	MIR4655	20.4787	6.73522	1.66548	4.89018
MACS_peak_3397	chr8	145874660	145875319	Intergenic	-36101	ARHGAP39	20.4787	6.73522	5.82917	4.13784
MACS_peak_2333	chr4	49215803	49216508	Intergenic	227890	CWH43	20.4787	6.73522	2.49822	5.26634
MACS_peak_2251	chr3	118792135	118792807	intron	-38795	IGSF11	20.4787	7.18424	2.49822	2.63317
MACS_peak_2938	chr7	44815267	44815871	Intergenic	19782	ZMIZ2	20.4787	7.18424	1.66548	2.63317
MACS_peak_1957	chr20	62017488	62018161	Intergenic	-25076	CHRNA4	20.4787	8.53128	3.33096	0.752335
MACS_peak_2270	chr3	190283232	190283791	intron	51671	IL1RAP	20.4787	8.98029	2.49822	5.26634
MACS_peak_2827	chr7	5093736	5094403	intron	8516	RBAK	20.4787	8.98029	4.99643	4.13784
MACS_peak_2514	chr5	112826407	112827118	Intergenic	-2235	MCC	20.4787	9.42931	3.33096	4.89018
MACS_peak_2733	chr7	1435519	1436244	Intergenic	63228	MICALL2	20.4787	9.42931	4.1637	3.00934
MACS_peak_3400	chr8	145891014	145891719	Intergenic	-52478	ARHGAP39	20.4787	9.42931	2.91459	3.76167
MACS_peak_2776	chr7	2235195	2235916	intron	37028	MAD1L1	20.4787	11.2254	4.58007	3.76167
MACS_peak_1125	chr17	80697945	80698684	intron	4862	FN3K	20.4787	16.1645	3.33096	1.50467
MACS_peak_3569	chrY	13464907	13465299	Intergenic	1068286	GYG2P1	20.4787	18.4096	6.24554	5.26634
MACS_peak_1944	chr20	60689645	60690225	Intergenic	-7582	LSM14B	19.8763	2.69409	2.08185	1.1285
MACS_peak_338	chr10	79225556	79226157	intron	171721	KCNMA1	19.8763	3.59212	2.08185	2.63317
MACS_peak_3201	chr8	140758510	140759150	intron	-43531	KCNK9	19.8763	4.49015	3.74733	3.76167
MACS_peak_1103	chr17	75244189	75244722	Intergenic	-33037	2009-09-01	19.8763	4.49015	2.91459	1.88084
MACS_peak_3193	chr8	140744030	140744545	exon	-28988	KCNK9	19.8763	4.49015	1.24911	3.38551
MACS_peak_1882	chr20	48833747	48834386	Intergenic	26946	CEBPB	19.8763	4.93916	2.08185	3.00934
MACS_peak_3096	chr8	118439117	118439852	Intergenic	-93481	MED30	19.8763	4.93916	1.24911	3.76167
MACS_peak_1963	chr20	62917506	62918069	Intergenic	-3951	LINC00266-1	19.8763	5.38818	0.41637	1.1285
MACS_peak_2392	chr5	258239	258792	Intergenic	-13221	PDCD6	19.8763	5.38818	2.91459	1.50467
MACS_peak_947	chr16	85663218	85663900	intron	16635	GSE1	19.8763	5.38818	3.33096	2.257
MACS_peak_3341	chr8	144249964	144250608	Intergenic	-8233	LY6H	19.8763	6.73522	0.832739	3.00934
MACS_peak_1378	chr19	37784567	37784831	Intergenic	-24787	LOC284412	19.8763	7.18424	2.91459	3.76167
MACS_peak_79	chr1	44395079	44395719	intron	-3593	ARTN	19.8763	7.18424	3.33096	3.76167
MACS_peak_1179	chr18	12911132	12911726	Intergenic	-27095	PTPN2	19.8763	7.18424	1.66548	3.00934
MACS_peak_2072	chr22	27948799	27949409	Intergenic	248382	MN1	19.8763	7.18424	2.91459	3.76167
MACS_peak_1529	chr19	58774875	58775463	TTS	-15149	ZNF8	19.8763	7.63325	2.08185	0.752335
MACS_peak_1185	chr18	13165416	13165965	Intergenic	-53096	C18orf1	19.8763	8.08227	1.66548	4.51401
MACS_peak_1166	chr18	10228757	10229492	Intergenic	-225501	APCDD1	19.8763	8.08227	3.33096	3.76167
MACS_peak_387	chr11	190239	190863	Intergenic	-2529	LOC653486	19.8763	8.53128	4.1637	4.51401
MACS_peak_3153	chr8	135458554	135459255	Intergenic	-151410	ZFAT-AS1	19.8763	8.53128	2.91459	2.257
MACS_peak_2108	chr22	35584871	35585433	Intergenic	-68293	HMGXB4	19.8763	8.98029	3.33096	3.38551
MACS_peak_1915	chr20	56921630	56922168	intron	37128	RAB22A	19.8763	9.87832	5.4128	4.89018
MACS_peak_2804	chr7	4410322	4410950	Intergenic	241319	SDK1	19.8763	10.3273	3.33096	2.257
MACS_peak_2289	chr4	30418729	30419303	Intergenic	-303014	PCDH7	19.8763	10.7764	4.58007	3.00934
MACS_peak_2792	chr7	4058399	4058940	intron	-110648	SDK1	19.8763	13.0214	3.74733	2.63317
MACS_peak_288	chr10	44110780	44111415	intron	9242	ZNF485	19.8763	14.3685	3.74733	4.51401
MACS_peak_2077	chr22	28097838	28098486	Intergenic	99324	MN1	19.8763	15.2665	4.58007	5.64251
MACS_peak_1648	chr2	88802430	88803079	Intergenic	-21415	TEX37	19.274	2.24507	2.91459	1.1285
MACS_peak_1539	chr2	11078882	11079522	Intergenic	27139	KCNF1	19.274	4.04113	4.1637	1.88084
MACS_peak_1620	chr2	62660053	62660677	Intergenic	73239	TMEM17	19.274	4.49015	2.49822	1.50467
MACS_peak_1491	chr19	56889683	56890228	non-coding	10465	ZNF542	19.274	4.49015	1.66548	2.257
MACS_peak_2116	chr22	35869959	35870662	Intergenic	-67042	RASD2	19.274	4.49015	2.08185	1.88084
MACS_peak_3416	chr8	145940355	145941001	Intergenic	40292	ZNF251	19.274	4.93916	4.58007	3.76167
MACS_peak_3541	chr9	137340154	137340847	Intergenic	69243	MIR4669	19.274	4.93916	2.49822	1.88084
MACS_peak_2772	chr7	2083194	2083805	intron	189084	MAD1L1	19.274	4.93916	0.832739	1.50467
MACS_peak_627	chr14	56003820	56004342	Intergenic	42729	KTN1-AS1	19.274	4.93916	2.91459	2.63317
MACS_peak_2018	chr22	21333282	21333867	exon	-2984	LZTR1	19.274	5.38818	3.74733	3.76167
MACS_peak_2145	chr22	46405739	46406374	non-coding	3560	LOC730668	19.274	5.38818	2.49822	2.257
MACS_peak_283	chr10	44028255	44028799	Intergenic	35380	ZNF239	19.274	5.38818	1.66548	3.38551
MACS_peak_1117	chr17	79759115	79759664	Intergenic	-2621	GCGR	19.274	5.83719	0.832739	2.257
MACS_peak_2304	chr4	40297107	40297694	Intergenic	-39946	CHRNA9	19.274	7.18424	3.74733	5.26634
MACS_peak_2510	chr5	108792993	108793645	Intergenic	-47644	PJA2	19.274	7.18424	1.66548	4.13784
MACS_peak_2045	chr22	25872834	25873396	Intergenic	29061	CRYBB2P1	19.274	7.63325	4.99643	6.01868
MACS_peak_306	chr10	55750427	55750988	intron	810344	PCDH15	19.274	7.63325	1.24911	1.1285
MACS_peak_1161	chr18	9600451	9601057	intron	13851	PPP4R1	19.274	8.08227	2.91459	2.257
MACS_peak_2730	chr7	1383792	1384354	Intergenic	111419	UNCX	19.274	8.08227	4.58007	4.13784
MACS_peak_1441	chr19	44988656	44989255	intron	15619	ZNF180	19.274	8.08227	0	1.88084
MACS_peak_2739	chr7	1766307	1766982	intron	17846	ELFN1	19.274	8.53128	4.99643	2.63317
MACS_peak_3446	chr8	146200244	146200778	non-coding	-19740	TMED10P1	19.274	8.98029	4.99643	4.51401
MACS_peak_2052	chr22	26224616	26225348	intron	86862	MYO18B	19.274	8.98029	4.99643	3.76167
MACS_peak_2089	chr22	30233783	30234351	intron	226	ASCC2	19.274	9.42931	3.74733	3.76167
MACS_peak_1171	chr18	11613312	11614019	Intergenic	-75349	GNAL	19.274	10.7764	0.41637	2.257
MACS_peak_2153	chr22	48231876	48232468	Intergenic	-204854	FLJ46257	19.274	11.2254	3.33096	3.76167
MACS_peak_109	chr1	95195122	95195653	Intergenic	-90511	SLC44A3	19.274	11.6744	1.66548	2.257
MACS_peak_1081	chr17	70821224	70821906	intron	-184954	LINC00511	19.274	13.4704	2.08185	3.76167
MACS_peak_2127	chr22	38355121	38355714	exon	-5741	C22orf23	19.274	15.2665	1.66548	1.50467
MACS_peak_2865	chr7	6543039	6543527	exon	-19434	KDELR2	18.6717	3.59212	1.24911	1.1285
MACS_peak_1659	chr2	89869055	89869516	Intergenic	757401	MIR4436A	18.6717	3.59212	5.4128	3.00934
MACS_peak_1735	chr2	122440175	122440636	intron	32840	LOC254128	18.6717	4.04113	2.49822	0.752335
MACS_peak_3372	chr8	145772225	145772896	exon	-18102	C8orf82	18.6717	4.49015	4.99643	3.38551
MACS_peak_645	chr14	61564788	61565476	Intergenic	117167	SLC38A6	18.6717	4.49015	3.33096	4.13784
MACS_peak_1399	chr19	39226677	39227312	intron	8120	CAPN12	18.6717	4.49015	2.49822	4.89018
MACS_peak_3246	chr8	141392305	141392840	intron	75289	TRAPPC9	18.6717	5.38818	1.66548	3.38551
MACS_peak_1881	chr20	48645973	48646544	Intergenic	11908	LINC00651	18.6717	5.83719	3.33096	1.50467
MACS_peak_3329	chr8	143884763	143885443	Intergenic	-17095	LY6D	18.6717	6.28621	2.91459	5.26634
MACS_peak_3328	chr8	143884051	143884659	Intergenic	-16347	LY6D	18.6717	6.28621	2.08185	2.63317
MACS_peak_272	chr10	43375170	43375849	Intergenic	97555	BMS1	18.6717	6.28621	4.58007	5.26634
MACS_peak_1900	chr20	54668778	54669391	Intergenic	-88556	CBLN4	18.6717	6.28621	2.49822	2.63317
MACS_peak_1122	chr17	80690372	80690929	Intergenic	-2802	FN3K	18.6717	6.73522	1.24911	2.63317
MACS_peak_726	chr14	75053308	75053837	intron	25462	LTBP2	18.6717	6.73522	0.41637	2.257
MACS_peak_112	chr1	108716742	108717404	intron	18358	SLC25A24	18.6717	7.18424	1.24911	1.88084
MACS_peak_78	chr1	44284469	44285119	intron	111590	ST3GAL3	18.6717	7.18424	3.33096	3.76167
MACS_peak_2272	chr3	193813272	193813918	Intergenic	-40336	HES1	18.6717	7.63325	1.66548	1.88084
MACS_peak_1981	chr21	30155847	30156510	Intergenic	101517	N6AMT1	18.6717	7.63325	3.74733	1.88084
MACS_peak_1008	chr17	37203057	37203639	intron	-9924	LOC100131347	18.6717	8.08227	1.66548	1.50467
MACS_peak_2281	chr3	197225498	197226132	Intergenic	57043	BDH1	18.6717	8.08227	2.91459	1.50467
MACS_peak_2943	chr7	46500223	46500779	Intergenic	-539630	IGFBP3	18.6717	8.08227	4.1637	2.257
MACS_peak_1707	chr2	106592507	106593122	Intergenic	-89299	C2orf40	18.6717	8.53128	4.58007	2.257
MACS_peak_2041	chr22	25740333	25740984	Intergenic	17866	LRP5L	18.6717	8.98029	3.74733	4.51401
MACS_peak_2479	chr5	42952988	42953614	Intergenic	65612	LOC648987	18.6717	9.42931	2.49822	4.13784
MACS_peak_114	chr1	109328169	109328824	intron	39211	STXBP3	18.6717	9.42931	3.33096	3.38551
MACS_peak_3380	chr8	145793094	145793682	intron	-38930	C8orf82	18.6717	9.87832	3.74733	4.89018
MACS_peak_610	chr14	49702657	49703392	Intergenic	350070	RPS29	18.6717	10.3273	2.91459	3.00934
MACS_peak_2439	chr5	16873282	16873965	intron	62762	MYO10	18.6717	10.3273	1.66548	1.50467
MACS_peak_2101	chr22	35240573	35241224	Intergenic	-221232	ISX	18.6717	11.2254	4.1637	6.77101
MACS_peak_3429	chr8	146073996	146074569	Intergenic	4169	COMMD5	18.6717	12.5724	4.58007	3.38551
MACS_peak_893	chr16	46415360	46415679	Intergenic	187490	ANKRD26P1	18.6717	13.9195	4.58007	12.4135
MACS_peak_1227	chr18	76412745	76413277	Intergenic	-327264	SALL3	18.0694	2.69409	0.832739	0.752335
MACS_peak_3319	chr8	143503520	143504078	Intergenic	-19256	TSNARE1	18.0694	3.1431	2.49822	4.89018
MACS_peak_2148	chr22	47223525	47224089	intron	65289	TBC1D22A	18.0694	3.59212	1.24911	0.752335
MACS_peak_2225	chr3	48698344	48698874	exon	1739	CELSR3	18.0694	3.59212	1.66548	2.257
MACS_peak_3566	chrX	100654309	100654833	intron	8430	GLA	18.0694	4.49015	0.832739	1.1285
MACS_peak_2259	chr3	125677537	125678194	Intergenic	-10163	ROPN1B	18.0694	4.93916	1.66548	2.257
MACS_peak_730	chr14	77358180	77358715	Intergenic	65722	C14orf166B	18.0694	5.83719	1.66548	1.50467
MACS_peak_556	chr12	133503877	133504493	intron	28683	ZNF605	18.0694	5.83719	1.66548	1.50467
MACS_peak_3421	chr8	146004574	146005133	intron	7872	ZNF34	18.0694	5.83719	4.1637	4.89018
MACS_peak_2114	chr22	35868391	35868950	Intergenic	-68682	RASD2	18.0694	5.83719	2.08185	2.257
MACS_peak_1937	chr20	60650653	60651176	Intergenic	-10048	TAF4	18.0694	6.73522	4.1637	3.76167
MACS_peak_1893	chr20	50704561	50705186	intron	103651	ZFP64	18.0694	6.73522	2.08185	3.76167
MACS_peak_683	chr14	67371064	67371738	intron	-284709	FAM71D	18.0694	6.73522	2.91459	3.00934
MACS_peak_2107	chr22	35580726	35581316	Intergenic	-72424	HMGXB4	18.0694	6.73522	4.99643	4.51401
MACS_peak_1723	chr2	114737317	114737845	promoter-TSS	-20	LOC100499194	18.0694	7.18424	4.1637	2.257
MACS_peak_2290	chr4	30679738	30680318	Intergenic	-42002	PCDH7	18.0694	7.18424	2.08185	3.76167
MACS_peak_489	chr12	10799478	10800050	intron	27127	STYK1	18.0694	7.18424	3.33096	2.63317
MACS_peak_2118	chr22	35887892	35888526	Intergenic	-49143	RASD2	18.0694	7.63325	2.08185	2.63317
MACS_peak_1537	chr2	10337031	10337691	intron	-4564	MIR4261	18.0694	7.63325	1.66548	3.38551
MACS_peak_3312	chr8	143451498	143452015	intron	32787	TSNARE1	18.0694	7.63325	5.82917	6.01868
MACS_peak_1061	chr17	62368747	62369386	Intergenic	-28413	TEX2	18.0694	8.08227	2.49822	2.63317
MACS_peak_3292	chr8	143386094	143386796	intron	98098	TSNARE1	18.0694	8.08227	4.58007	1.1285
MACS_peak_778	chr15	63397957	63398442	Intergenic	-15800	LACTB	18.0694	8.53128	4.1637	3.38551
MACS_peak_832	chr16	3356362	3356913	intron	-1198	TIGD7	18.0694	8.53128	2.08185	3.76167
MACS_peak_1035	chr17	58566105	58566598	intron	37229	APPBP2	18.0694	8.53128	3.33096	6.39485
MACS_peak_2864	chr7	6528740	6529318	Intergenic	-5180	KDELR2	18.0694	9.87832	3.33096	3.38551
MACS_peak_86	chr1	45803494	45804068	intron	-1561	TOE1	18.0694	9.87832	4.99643	3.38551
MACS_peak_2862	chr7	6159303	6159801	intron	15002	USP42	18.0694	10.3273	3.33096	2.63317
MACS_peak_1630	chr2	71212930	71213477	TTS	7628	ANKRD53	18.0694	11.2254	2.49822	6.01868
MACS_peak_1065	chr17	63966572	63967190	intron	-144220	CEP112	18.0694	11.2254	4.58007	4.51401
MACS_peak_2079	chr22	28176066	28176647	intron	21130	MN1	18.0694	13.0214	5.82917	2.63317
MACS_peak_2890	chr7	6727951	6728493	3' UTR	18344	ZNF12	18.0694	14.8175	4.58007	3.76167
MACS_peak_583	chr13	112690674	112691200	Intergenic	-30976	SOX1	17.4671	1.34704	0.832739	0.752335
MACS_peak_129	chr1	114785279	114785765	Intergenic	-89050	SYT6	17.4671	2.24507	0.832739	0.376167
MACS_peak_736	chr15	20307425	20307782	Intergenic	-180394	CHEK2P2	17.4671	2.69409	2.91459	2.63317
MACS_peak_1590	chr2	42328534	42328968	Intergenic	53590	PKDCC	17.4671	3.1431	0.832739	2.257
MACS_peak_1178	chr18	12777596	12778094	Intergenic	74858	PSMG2	17.4671	3.1431	2.49822	3.00934
MACS_peak_3384	chr8	145813436	145813894	intron	25223	ARHGAP39	17.4671	3.59212	2.91459	3.00934
MACS_peak_2690	chr7	295584	296071	exon	-34309	LOC100288524	17.4671	4.49015	0.41637	0.752335
MACS_peak_2074	chr22	28062967	28063381	Intergenic	134312	MN1	17.4671	4.93916	4.58007	4.51401
MACS_peak_525	chr12	57550325	57550941	exon	28351	LRP1	17.4671	4.93916	2.08185	2.63317
MACS_peak_744	chr15	20548903	20549470	Intergenic	61189	CHEK2P2	17.4671	4.93916	2.08185	3.00934
MACS_peak_2242	chr3	98877760	98878364	Intergenic	-257529	DCBLD2	17.4671	4.93916	3.33096	2.257
MACS_peak_2785	chr7	3006069	3006685	intron	77132	CARD11	17.4671	5.38818	3.33096	4.51401
MACS_peak_2873	chr7	6694360	6694852	Intergenic	39079	ZNF853	17.4671	5.83719	1.66548	1.50467
MACS_peak_1176	chr18	12558999	12559667	intron	97398	SPIRE1	17.4671	5.83719	0.41637	1.1285
MACS_peak_94	chr1	52424386	52424979	intron	31754	RAB3B	17.4671	6.28621	1.24911	1.1285
MACS_peak_3497	chr9	69840044	69840557	Intergenic	188939	LOC100133920	17.4671	6.28621	3.74733	5.26634
MACS_peak_266	chr10	43016681	43017192	intron	31344	ZNF37BP	17.4671	6.28621	2.49822	3.00934
MACS_peak_3522	chr9	130285832	130286338	exon	45270	FAM129B	17.4671	6.73522	0.41637	1.1285
MACS_peak_1902	chr20	55130661	55131258	Intergenic	22657	FAM209B	17.4671	6.73522	3.74733	3.76167
MACS_peak_2888	chr7	6725096	6725612	Intergenic	21212	ZNF12	17.4671	6.73522	3.74733	4.51401
MACS_peak_3150	chr8	135247509	135248071	Intergenic	-362524	ZFAT-AS1	17.4671	6.73522	4.58007	1.88084
MACS_peak_3112	chr8	123745635	123746224	Intergenic	-47972	ZHX2	17.4671	7.18424	4.1637	4.13784
MACS_peak_3381	chr8	145806071	145806656	exon	32525	ARHGAP39	17.4671	7.18424	4.1637	2.257
MACS_peak_2861	chr7	5643354	5643964	exon	11223	FSCN1	17.4671	7.18424	2.08185	3.76167
MACS_peak_1039	chr17	59474659	59475276	Intergenic	-2290	TBX2	17.4671	7.63325	3.74733	3.00934
MACS_peak_982	chr17	17210409	17210889	intron	3969	NT5M	17.4671	7.63325	2.91459	2.63317
MACS_peak_661	chr14	64060875	64061360	Intergenic	47524	WDR89	17.4671	7.63325	3.33096	2.63317
MACS_peak_2369	chr4	75119204	75119747	intron	-54712	EPGN	17.4671	7.63325	1.66548	0.752335
MACS_peak_360	chr10	105512177	105512762	intron	5932	LOC100505839	17.4671	7.63325	3.74733	2.257
MACS_peak_1632	chr2	71691462	71691930	intron	-2136	DYSF	17.4671	8.08227	1.66548	3.76167
MACS_peak_808	chr15	90555067	90555569	intron	10566	ZNF710	17.4671	8.08227	1.24911	4.51401
MACS_peak_3407	chr8	145929676	145930190	Intergenic	51037	ZNF251	17.4671	8.08227	2.91459	2.257
MACS_peak_2075	chr22	28088819	28089379	Intergenic	108387	MN1	17.4671	9.42931	2.91459	3.76167
MACS_peak_3177	chr8	139759419	139760052	intron	166501	COL22A1	17.4671	9.87832	5.4128	5.26634
MACS_peak_2829	chr7	5099043	5099726	intron	-12307	LOC389458	17.4671	10.3273	2.91459	4.51401
MACS_peak_745	chr15	20549748	20550367	Intergenic	62060	CHEK2P2	17.4671	10.3273	3.74733	3.00934
MACS_peak_3269	chr8	142953785	142954473	Intergenic	-303571	MIR4472-1	17.4671	10.3273	1.66548	1.50467
MACS_peak_2881	chr7	6714429	6715027	Intergenic	31838	ZNF12	17.4671	10.7764	3.33096	3.76167
MACS_peak_3386	chr8	145816088	145816706	intron	22491	ARHGAP39	17.4671	11.2254	2.91459	2.257
MACS_peak_1359	chr19	37239841	37240465	exon	23563	ZNF850	17.4671	13.0214	1.66548	4.13784
MACS_peak_3342	chr8	144250685	144251203	Intergenic	-8891	LY6H	16.8648	0.449015	1.66548	3.38551
MACS_peak_1314	chr19	30867494	30868041	intron	4439	ZNF536	16.8648	2.24507	2.91459	2.257
MACS_peak_675	chr14	66183359	66183927	intron	304195	FUT8	16.8648	2.69409	0	1.88084
MACS_peak_2491	chr5	54908931	54909474	Intergenic	-78329	PPAP2A	16.8648	3.1431	2.08185	2.257
MACS_peak_3223	chr8	140869011	140869552	intron	-153982	KCNK9	16.8648	3.1431	2.91459	1.1285
MACS_peak_2176	chr22	50094507	50094990	Intergenic	-43558	C22orf34	16.8648	3.1431	1.66548	1.1285
MACS_peak_687	chr14	68392345	68392907	intron	106130	RAD51B	16.8648	3.1431	3.74733	1.88084
MACS_peak_763	chr15	30014472	30014943	intron	99999	TJP1	16.8648	3.1431	1.66548	0.376167
MACS_peak_1024	chr17	47659643	47660194	3' UTR	6620	NXPH3	16.8648	3.59212	0.832739	1.50467
MACS_peak_2001	chr21	45910158	45910703	Intergenic	-26668	C21orf90	16.8648	4.04113	0.832739	1.50467
MACS_peak_220	chr10	32794707	32795242	intron	59933	CCDC7	16.8648	4.04113	2.91459	1.1285
MACS_peak_2719	chr7	727493	728146	intron	24342	PRKAR1B	16.8648	4.04113	1.24911	1.88084
MACS_peak_3268	chr8	142953159	142953553	Intergenic	-304344	MIR4472-1	16.8648	4.04113	1.24911	1.1285
MACS_peak_2017	chr22	21332609	21333112	intron	-3698	LZTR1	16.8648	4.49015	2.91459	1.88084
MACS_peak_944	chr16	85216913	85217366	Intergenic	46383	LOC400548	16.8648	4.93916	1.66548	1.88084
MACS_peak_3406	chr8	145926577	145927162	Intergenic	54101	ZNF251	16.8648	4.93916	4.58007	3.76167
MACS_peak_340	chr10	79711363	79711769	Intergenic	24996	LOC100128292	16.8648	4.93916	3.33096	2.63317
MACS_peak_3498	chr9	69841307	69841866	Intergenic	190225	LOC100133920	16.8648	5.38818	2.91459	3.76167
MACS_peak_1414	chr19	44357776	44358201	Intergenic	26300	ZNF404	16.8648	5.38818	1.66548	2.63317
MACS_peak_2180	chr22	50705292	50705798	intron	3234	MAPK11	16.8648	5.83719	0.832739	1.50467
MACS_peak_668	chr14	65240350	65240808	intron	49287	SPTB	16.8648	6.28621	2.91459	1.88084
MACS_peak_1066	chr17	65428638	65429114	intron	55479	PITPNC1	16.8648	6.28621	2.91459	3.38551
MACS_peak_967	chr16	89652986	89653471	intron	11052	CPNE7	16.8648	6.28621	2.08185	2.257
MACS_peak_932	chr16	80647823	80648304	intron	73209	DYNLRB2	16.8648	6.28621	4.1637	4.13784
MACS_peak_2767	chr7	2070069	2070608	intron	-186449	MIR4655	16.8648	6.73522	4.99643	2.257
MACS_peak_2530	chr5	140698334	140698802	exon	1783	TAF7	16.8648	7.18424	0.832739	2.257
MACS_peak_623	chr14	55038876	55039351	intron	4783	SAMD4A	16.8648	7.18424	2.08185	4.51401
MACS_peak_847	chr16	4805184	4805712	intron	11718	ZNF500	16.8648	7.18424	2.91459	2.63317
MACS_peak_2903	chr7	24825115	24825678	Intergenic	-27757	DFNA5	16.8648	7.63325	2.91459	3.38551
MACS_peak_2120	chr22	37132731	37133295	Intergenic	-34323	CACNG2	16.8648	7.63325	0.832739	1.88084
MACS_peak_742	chr15	20500476	20500994	Intergenic	12738	CHEK2P2	16.8648	7.63325	4.1637	1.88084
MACS_peak_3019	chr7	73958862	73959475	intron	91048	GTF2IRD1	16.8648	7.63325	0.832739	2.63317
MACS_peak_830	chr16	3340136	3340679	exon	6920	ZNF263	16.8648	7.63325	3.74733	2.63317
MACS_peak_3131	chr8	128567094	128567740	Intergenic	-73033	LOC727677	16.8648	7.63325	5.4128	4.89018
MACS_peak_1652	chr2	89844752	89845275	Intergenic	733129	MIR4436A	16.8648	8.08227	4.99643	7.14718
MACS_peak_3248	chr8	141982282	141982771	intron	28886	PTK2	16.8648	8.08227	4.1637	5.26634
MACS_peak_1565	chr2	28191021	28191636	intron	-27906	MIR4263	16.8648	8.53128	2.49822	3.38551
MACS_peak_3124	chr8	126470521	126471127	Intergenic	28261	TRIB1	16.8648	8.98029	4.58007	4.13784
MACS_peak_1188	chr18	13278075	13278551	intron	59527	C18orf1	16.8648	9.42931	2.49822	3.38551
MACS_peak_3122	chr8	126381429	126381894	Intergenic	-60902	TRIB1	16.8648	9.42931	2.91459	3.00934
MACS_peak_2973	chr7	61825160	61825692	Intergenic	939008	LOC643955	16.8648	9.87832	4.99643	3.76167
MACS_peak_1705	chr2	105223910	105224524	Intergenic	149960	LOC284998	16.8648	9.87832	2.49822	3.38551
MACS_peak_56	chr1	40929435	40929881	TTS	13321	ZNF643	16.8648	10.3273	1.66548	3.00934
MACS_peak_1534	chr2	9998430	9999008	intron	15148	TAF1B	16.8648	11.6744	3.33096	2.257
MACS_peak_605	chr14	43604987	43605462	Intergenic	1371275	FSCB	16.2625	3.1431	3.33096	0.376167
MACS_peak_2359	chr4	64214952	64215421	Intergenic	1059992	TECRL	16.2625	3.1431	1.24911	0.376167
MACS_peak_276	chr10	43975595	43976185	intron	43316	ZNF487P	16.2625	3.1431	3.74733	3.76167
MACS_peak_563	chr12	133654628	133655156	Intergenic	-2145	ZNF140	16.2625	3.1431	1.66548	1.88084
MACS_peak_3485	chr9	44875366	44875876	Intergenic	-114615	FAM27C	16.2625	3.59212	0.41637	0.376167
MACS_peak_546	chr12	124811033	124811625	intron	37619	FAM101A	16.2625	3.59212	2.08185	1.1285
MACS_peak_1928	chr20	57617287	57617729	intron	393	SLMO2-ATP5E	16.2625	4.04113	2.49822	4.13784
MACS_peak_347	chr10	82573795	82574249	Intergenic	273447	SH2D4B	16.2625	4.04113	0.832739	1.50467
MACS_peak_2781	chr7	2472036	2472534	exon	29090	CHST12	16.2625	4.04113	1.66548	1.88084
MACS_peak_1861	chr20	46325731	46326298	intron	88794	SULF2	16.2625	4.04113	2.49822	2.257
MACS_peak_2443	chr5	25614590	25615056	Intergenic	-774131	LOC340107	16.2625	4.04113	1.24911	1.50467
MACS_peak_1249	chr19	246450	246933	Intergenic	44478	PPAP2C	16.2625	4.49015	0.832739	0
MACS_peak_1205	chr18	14223403	14223972	intron	44591	ANKRD20A5P	16.2625	4.49015	1.24911	0.752335
MACS_peak_2006	chr22	19414467	19414934	intron	4519	HIRA	16.2625	4.93916	0.832739	4.13784
MACS_peak_1582	chr2	38302080	38302595	exon	986	CYP1B1	16.2625	4.93916	0.832739	1.50467
MACS_peak_1423	chr19	44419412	44419902	intron	-13702	LOC100505715	16.2625	4.93916	1.24911	1.88084
MACS_peak_2478	chr5	42952318	42952808	Intergenic	66350	LOC648987	16.2625	4.93916	0.832739	2.63317
MACS_peak_1207	chr18	14997218	14997718	Intergenic	167303	MIR3156-2	16.2625	4.93916	4.1637	1.88084
MACS_peak_2499	chr5	71666908	71667446	Intergenic	50977	PTCD2	16.2625	5.38818	2.91459	1.50467
MACS_peak_26	chr1	22904494	22905116	intron	14801	EPHA8	16.2625	5.38818	2.08185	1.88084
MACS_peak_2541	chr5	150447191	150447679	intron	-2743	TNIP1	16.2625	5.83719	1.66548	1.88084
MACS_peak_1429	chr19	44473687	44474175	Intergenic	-14391	ZNF155	16.2625	5.83719	2.08185	1.1285
MACS_peak_1031	chr17	57249889	57250349	intron	17259	PRR11	16.2625	5.83719	1.24911	2.257
MACS_peak_1243	chr18	77659339	77659811	exon	35907	KCNG2	16.2625	5.83719	0.41637	0.752335
MACS_peak_341	chr10	79727336	79727862	Intergenic	41029	LOC100128292	16.2625	5.83719	1.24911	3.76167
MACS_peak_1837	chr20	42331136	42331772	exon	24188	GTSF1L	16.2625	6.28621	2.91459	2.257
MACS_peak_1711	chr2	110060775	110061266	intron	-130939	MIR4266	16.2625	6.28621	4.1637	3.38551
MACS_peak_2097	chr22	35173937	35174499	Intergenic	-287912	ISX	16.2625	6.28621	4.99643	4.51401
MACS_peak_3451	chr8	146207828	146208314	intron	-12180	TMED10P1	16.2625	6.73522	3.33096	2.63317
MACS_peak_3514	chr9	101126942	101127384	intron	-109160	TBC1D2	16.2625	6.73522	3.74733	1.50467
MACS_peak_3337	chr8	144150037	144150573	Intergenic	29626	C8orf31	16.2625	7.18424	4.58007	3.38551
MACS_peak_1236	chr18	77333888	77334368	Intergenic	-105673	CTDP1	16.2625	7.18424	2.08185	1.1285
MACS_peak_1913	chr20	56793623	56794178	Intergenic	67917	C20orf85	16.2625	7.63325	3.33096	1.1285
MACS_peak_547	chr12	124953837	124954320	intron	97932	NCOR2	16.2625	8.08227	2.08185	1.88084
MACS_peak_2907	chr7	30493594	30494043	intron	24575	NOD1	16.2625	8.98029	2.91459	3.00934
MACS_peak_2393	chr5	649090	649611	intron	36945	CEP72	16.2625	9.87832	1.66548	1.50467
MACS_peak_2612	chr6	37830888	37831475	intron	43874	ZFAND3	16.2625	9.87832	2.91459	4.89018
MACS_peak_3141	chr8	133261929	133262612	intron	-144758	HHLA1	16.2625	9.87832	4.1637	4.13784
MACS_peak_776	chr15	62562165	62562692	Intergenic	-104946	C2CD4B	16.2625	9.87832	0.832739	2.257
MACS_peak_3472	chr9	35509355	35509911	intron	19626	RUSC2	16.2625	13.0214	3.74733	3.00934
MACS_peak_2810	chr7	4464128	4464659	Intergenic	-257537	FOXK1	15.6601	2.69409	2.91459	1.88084
MACS_peak_2910	chr7	32150924	32151424	intron	-40129	PDE1C	15.6601	2.69409	3.33096	1.50467
MACS_peak_368	chr10	118031749	118032265	promoter-TSS	-188	GFRA1	15.6601	3.1431	0.41637	0.752335
MACS_peak_1721	chr2	114359753	114360165	promoter-TSS	-806	DDX11L2	15.6601	3.1431	0.41637	1.1285
MACS_peak_115	chr1	110254501	110254981	promoter-TSS	-123	GSTM5	15.6601	3.59212	0.832739	2.257
MACS_peak_816	chr16	1380193	1380698	Intergenic	-3161	BAIAP3	15.6601	3.59212	1.66548	3.00934
MACS_peak_2511	chr5	108823423	108823959	Intergenic	-78016	PJA2	15.6601	3.59212	0.832739	0
MACS_peak_2808	chr7	4462399	4462875	Intergenic	-259293	FOXK1	15.6601	3.59212	2.91459	3.76167
MACS_peak_2813	chr7	4540419	4540927	Intergenic	-181257	FOXK1	15.6601	3.59212	2.91459	2.63317
MACS_peak_836	chr16	3358966	3359460	intron	-3774	TIGD7	15.6601	4.04113	1.66548	2.63317
MACS_peak_1442	chr19	44991702	44992345	intron	12551	ZNF180	15.6601	4.04113	2.08185	0.752335
MACS_peak_2723	chr7	1060467	1060899	intron	1979	MIR339	15.6601	4.49015	1.66548	2.63317
MACS_peak_2727	chr7	1351776	1352266	Intergenic	79367	UNCX	15.6601	4.49015	4.1637	1.1285
MACS_peak_1771	chr2	194700935	194701508	Intergenic	1086650	PCGEM1	15.6601	4.49015	2.49822	1.50467
MACS_peak_219	chr10	31756809	31757327	intron	147004	ZEB1	15.6601	4.49015	1.66548	2.257
MACS_peak_3333	chr8	143993314	143993863	intron	5671	CYP11B2	15.6601	4.49015	3.74733	1.88084
MACS_peak_2483	chr5	43813649	43814202	Intergenic	-210593	LOC100652772	15.6601	4.49015	1.24911	2.257
MACS_peak_2984	chr7	62547504	62547907	Intergenic	216729	LOC643955	15.6601	4.93916	0.41637	0.752335
MACS_peak_3493	chr9	68300233	68300701	Intergenic	153908	LOC642236	15.6601	5.38818	2.08185	0.752335
MACS_peak_7	chr1	2629027	2629493	intron	-64779	MMEL1	15.6601	5.38818	1.24911	1.88084
MACS_peak_522	chr12	51750728	51751274	intron	-10538	CELA1	15.6601	5.83719	1.66548	2.63317
MACS_peak_3196	chr8	140749163	140749633	intron	-34099	KCNK9	15.6601	5.83719	2.49822	1.1285
MACS_peak_3411	chr8	145933257	145933832	Intergenic	47426	ZNF251	15.6601	5.83719	4.58007	4.13784
MACS_peak_2835	chr7	5130909	5131517	Intergenic	19522	LOC389458	15.6601	5.83719	4.1637	6.39485
MACS_peak_243	chr10	42377290	42377880	Intergenic	485908	LOC441666	15.6601	5.83719	2.08185	4.51401
MACS_peak_2475	chr5	42149235	42149751	Intergenic	224137	FBXO4	15.6601	5.83719	1.24911	2.257
MACS_peak_3215	chr8	140839388	140839923	intron	-124356	KCNK9	15.6601	5.83719	2.49822	1.50467
MACS_peak_2123	chr22	37660008	37660609	Intergenic	-18187	CYTH4	15.6601	6.28621	2.91459	3.76167
MACS_peak_567	chr12	133682086	133682588	exon	-24877	ZNF10	15.6601	6.28621	2.49822	2.257
MACS_peak_3207	chr8	140787224	140787799	intron	-72212	KCNK9	15.6601	6.28621	2.49822	1.88084
MACS_peak_3140	chr8	132499272	132499870	Intergenic	-416785	EFR3A	15.6601	6.28621	1.66548	2.257
MACS_peak_1995	chr21	34909658	34910207	intron	4532	GART	15.6601	6.73522	2.08185	0.752335
MACS_peak_2782	chr7	2522458	2522994	Intergenic	-29437	LFNG	15.6601	6.73522	4.99643	4.89018
MACS_peak_2853	chr7	5475561	5476103	Intergenic	-12655	TNRC18	15.6601	6.73522	4.58007	3.38551
MACS_peak_531	chr12	111741683	111742205	intron	64981	FAM109A	15.6601	6.73522	0.41637	2.63317
MACS_peak_2894	chr7	6740142	6740668	intron	6161	ZNF12	15.6601	7.18424	2.49822	2.257
MACS_peak_2332	chr4	49213571	49214127	Intergenic	225584	CWH43	15.6601	7.63325	3.33096	5.26634
MACS_peak_3156	chr8	135686079	135686581	intron	22471	ZFAT	15.6601	8.08227	1.66548	2.257
MACS_peak_684	chr14	67411156	67411712	intron	-244676	FAM71D	15.6601	8.08227	2.91459	1.1285
MACS_peak_3276	chr8	143028117	143028784	Intergenic	-229250	MIR4472-1	15.6601	8.08227	4.1637	2.257
MACS_peak_3192	chr8	140743318	140743813	intron	-28266	KCNK9	15.6601	8.53128	1.24911	2.63317
MACS_peak_2764	chr7	2063808	2064401	intron	-180215	MIR4655	15.6601	8.53128	2.91459	4.13784
MACS_peak_59	chr1	40962884	40963357	Intergenic	-11313	DEM1	15.6601	8.98029	3.33096	3.00934
MACS_peak_1004	chr17	36624606	36625105	intron	40135	ARHGAP23	15.6601	9.87832	1.66548	0.376167
MACS_peak_2417	chr5	4394669	4395197	Intergenic	-639539	LOC340094	15.0578	2.24507	2.49822	1.88084
MACS_peak_2068	chr22	27650002	27650516	Intergenic	547227	MN1	15.0578	2.24507	3.33096	5.64251
MACS_peak_3070	chr8	84944365	84944996	Intergenic	-150773	RALYL	15.0578	2.69409	2.08185	3.00934
MACS_peak_2749	chr7	1868676	1869244	intron	14929	MIR4655	15.0578	2.69409	1.66548	1.88084
MACS_peak_1068	chr17	66596137	66596608	intron	723	FAM20A	15.0578	2.69409	1.24911	0.752335
MACS_peak_481	chr12	4093635	4094110	Intergenic	-111264	PARP11	15.0578	3.1431	2.49822	0.752335
MACS_peak_3401	chr8	145891727	145892196	Intergenic	-53073	ARHGAP39	15.0578	3.1431	1.66548	4.13784
MACS_peak_2959	chr7	56184012	56184528	promoter-TSS	-180	NUPR1L	15.0578	3.1431	2.49822	2.63317
MACS_peak_609	chr14	46576457	46576922	Intergenic	544339	RPL10L	15.0578	3.1431	2.08185	1.50467
MACS_peak_261	chr10	42859080	42859611	intron	4148	LOC441666	15.0578	3.59212	2.91459	3.76167
MACS_peak_178	chr1	236260405	236260838	Intergenic	-32140	NID1	15.0578	3.59212	4.1637	3.38551
MACS_peak_851	chr16	10478979	10479454	promoter-TSS	-696	ATF7IP2	15.0578	3.59212	0.41637	1.1285
MACS_peak_2419	chr5	7849793	7850296	intron	1559	C5orf49	15.0578	3.59212	0.832739	2.63317
MACS_peak_1559	chr2	25121767	25122302	intron	20021	ADCY3	15.0578	3.59212	0.832739	1.1285
MACS_peak_2397	chr5	1026513	1027031	intron	17695	NKD2	15.0578	3.59212	2.08185	0
MACS_peak_3163	chr8	136416720	136417252	Intergenic	-52730	KHDRBS3	15.0578	3.59212	1.24911	1.1285
MACS_peak_3	chr1	1886547	1887028	3' UTR	-36047	TMEM52	15.0578	4.04113	0	0.376167
MACS_peak_2737	chr7	1747708	1748198	promoter-TSS	-845	ELFN1	15.0578	4.04113	2.08185	2.63317
MACS_peak_2462	chr5	36645514	36645964	intron	37308	SLC1A3	15.0578	4.04113	3.74733	2.257
MACS_peak_1262	chr19	8133653	8134240	intron	16300	CCL25	15.0578	4.04113	2.08185	2.257
MACS_peak_519	chr12	47662269	47662740	Intergenic	-52278	PCED1B-AS1	15.0578	4.04113	3.33096	2.257
MACS_peak_2378	chr4	89281949	89282472	Intergenic	-17681	HERC6	15.0578	4.49015	2.49822	1.50467
MACS_peak_2726	chr7	1155569	1156101	intron	22058	C7orf50	15.0578	4.49015	2.49822	4.89018
MACS_peak_2172	chr22	49778879	49779367	Intergenic	272067	C22orf34	15.0578	4.49015	2.49822	3.00934
MACS_peak_1656	chr2	89853591	89853990	Intergenic	741906	MIR4436A	15.0578	4.49015	2.91459	3.76167
MACS_peak_1930	chr20	57895532	57896082	intron	20308	EDN3	15.0578	4.49015	1.24911	1.1285
MACS_peak_1888	chr20	49945673	49946206	Intergenic	123575	MIR3194	15.0578	4.49015	4.99643	5.64251
MACS_peak_2661	chr6	131375574	131376181	intron	8585	EPB41L2	15.0578	4.49015	1.24911	3.38551
MACS_peak_3422	chr8	146039356	146039844	Intergenic	-13303	ZNF7	15.0578	4.93916	2.49822	1.50467
MACS_peak_2643	chr6	64588154	64588763	intron	232027	PHF3	15.0578	4.93916	3.33096	2.63317
MACS_peak_1154	chr18	7814981	7815508	intron	247930	PTPRM	15.0578	4.93916	2.49822	2.257
MACS_peak_97	chr1	59356885	59357469	intron	106354	LOC100131060	15.0578	4.93916	3.33096	2.63317
MACS_peak_3160	chr8	136025050	136025559	Intergenic	-208116	MIR30D	15.0578	4.93916	1.66548	3.38551
MACS_peak_1043	chr17	59531709	59532325	Intergenic	-1790	TBX4	15.0578	5.38818	0.832739	1.50467
MACS_peak_2173	chr22	49782525	49782995	Intergenic	268430	C22orf34	15.0578	5.38818	2.08185	1.88084
MACS_peak_1234	chr18	77332593	77333102	Intergenic	-106954	CTDP1	15.0578	5.38818	2.08185	2.257
MACS_peak_2582	chr5	179688025	179688452	intron	30833	MAPK9	15.0578	5.83719	3.74733	2.257
MACS_peak_2874	chr7	6695561	6696051	Intergenic	40279	ZNF853	15.0578	5.83719	3.33096	0.752335
MACS_peak_3459	chr9	27417403	27417892	intron	-106665	IFNK	15.0578	5.83719	4.1637	3.38551
MACS_peak_1698	chr2	101789430	101790005	Intergenic	-21871	TBC1D8	15.0578	6.28621	2.08185	4.13784
MACS_peak_1096	chr17	74610884	74611418	Intergenic	28743	ST6GALNAC1	15.0578	6.28621	0.41637	1.88084
MACS_peak_2777	chr7	2236842	2237320	intron	35502	MAD1L1	15.0578	6.28621	2.08185	1.88084
MACS_peak_918	chr16	71037766	71038231	intron	-202937	VAC14	15.0578	6.28621	4.99643	4.89018
MACS_peak_121	chr1	110470234	110470879	intron	17323	CSF1	15.0578	6.73522	1.24911	2.63317
MACS_peak_533	chr12	114163722	114164173	Intergenic	240229	RBM19	15.0578	6.73522	0.41637	0.376167
MACS_peak_1087	chr17	71480364	71480959	intron	159566	SDK2	15.0578	6.73522	4.1637	1.88084
MACS_peak_2602	chr6	35867376	35867817	intron	21361	SRPK1	15.0578	6.73522	1.66548	3.00934
MACS_peak_2431	chr5	14061117	14061638	Intergenic	-82452	TRIO	15.0578	6.73522	2.91459	4.51401
MACS_peak_1982	chr21	30625301	30625876	intron	-45632	BACH1	15.0578	7.18424	4.58007	1.88084
MACS_peak_2848	chr7	5360749	5361205	intron	38416	SLC29A4	15.0578	7.18424	1.66548	2.63317
MACS_peak_3460	chr9	27788840	27789363	Intergenic	-215237	C9orf72	15.0578	7.18424	3.74733	1.50467
MACS_peak_277	chr10	43979222	43979716	Intergenic	46895	ZNF487P	15.0578	7.63325	1.66548	4.51401
MACS_peak_2452	chr5	32187116	32187657	Intergenic	-12961	GOLPH3	15.0578	8.08227	1.24911	1.88084
MACS_peak_1433	chr19	44838697	44839148	intron	21934	ZFP112	15.0578	8.08227	0	1.1285
MACS_peak_1916	chr20	56965301	56965797	intron	1374	VAPB	15.0578	8.53128	2.08185	4.51401
MACS_peak_565	chr12	133655529	133656096	Intergenic	-1225	ZNF140	15.0578	8.53128	1.66548	1.1285
MACS_peak_1014	chr17	41426149	41426702	Intergenic	39841	LOC100130581	15.0578	8.53128	2.08185	2.63317
MACS_peak_828	chr16	3338301	3338776	exon	5051	ZNF263	15.0578	8.53128	0.41637	2.257
MACS_peak_2050	chr22	26217278	26217766	intron	79402	MYO18B	15.0578	8.98029	3.74733	3.00934
MACS_peak_891	chr16	46411288	46411606	Intergenic	191562	ANKRD26P1	15.0578	8.98029	2.49822	3.00934
MACS_peak_845	chr16	3434062	3434497	intron	-11996	MTRNR2L4	15.0578	9.87832	3.74733	1.88084
MACS_peak_1048	chr17	60082761	60083234	intron	59646	MED13	15.0578	9.87832	3.33096	3.76167
MACS_peak_1428	chr19	44472837	44473296	Intergenic	-15256	ZNF155	15.0578	10.3273	1.24911	1.50467
MACS_peak_142	chr1	143283211	143283532	Intergenic	-403759	LOC100130000	15.0578	10.7764	4.58007	6.39485
MACS_peak_143	chr1	143536658	143537108	Intergenic	-150247	LOC100130000	15.0578	12.5724	3.33096	6.77101
MACS_peak_1685	chr2	96498320	96498729	Intergenic	-177775	FAHD2CP	14.4555	1.34704	1.66548	0.376167
MACS_peak_2580	chr5	179679404	179679718	intron	39510	MAPK9	14.4555	1.34704	0	1.1285
MACS_peak_2576	chr5	179237988	179238402	intron	4192	SQSTM1	14.4555	1.34704	1.24911	1.1285
MACS_peak_2626	chr6	46891161	46891539	intron	-1636	GPR116	14.4555	1.79606	2.49822	1.88084
MACS_peak_371	chr10	120587213	120587659	Intergenic	-72678	CACUL1	14.4555	2.24507	3.33096	1.1285
MACS_peak_2814	chr7	4686096	4686584	Intergenic	-35590	FOXK1	14.4555	2.24507	0.41637	2.257
MACS_peak_2599	chr6	34485707	34486287	intron	3348	PACSIN1	14.4555	2.24507	2.08185	2.63317
MACS_peak_357	chr10	95280831	95281283	intron	24668	CEP55	14.4555	2.69409	0.41637	1.88084
MACS_peak_2119	chr22	37054759	37055293	intron	43664	CACNG2	14.4555	2.69409	2.49822	2.257
MACS_peak_2675	chr6	161442192	161442614	intron	29581	MAP3K4	14.4555	2.69409	1.24911	3.00934
MACS_peak_3009	chr7	70178496	70178976	intron	-419053	WBSCR17	14.4555	3.1431	1.24911	1.88084
MACS_peak_2834	chr7	5111454	5111917	promoter-TSS	-6	LOC389458	14.4555	3.1431	2.49822	4.13784
MACS_peak_3330	chr8	143885784	143886298	Intergenic	-18033	LY6D	14.4555	3.1431	3.33096	3.76167
MACS_peak_3113	chr8	123964672	123965169	exon	89743	DERL1	14.4555	3.1431	1.24911	3.38551
MACS_peak_301	chr10	46978330	46978780	Intergenic	-7954	SYT15	14.4555	3.59212	4.58007	3.00934
MACS_peak_3282	chr8	143223796	143224269	Intergenic	-33668	MIR4472-1	14.4555	3.59212	2.91459	3.38551
MACS_peak_1152	chr18	6695711	6696188	Intergenic	-138483	ARHGAP28	14.4555	3.59212	2.49822	1.1285
MACS_peak_1107	chr17	75872549	75873018	Intergenic	7386	FLJ45079	14.4555	3.59212	1.24911	1.1285
MACS_peak_1037	chr17	58570228	58570733	intron	33100	APPBP2	14.4555	3.59212	3.74733	4.89018
MACS_peak_3324	chr8	143729826	143730311	Intergenic	21333	JRK	14.4555	3.59212	3.33096	3.00934
MACS_peak_1029	chr17	56026549	56026977	Intergenic	38852	VEZF1	14.4555	4.04113	2.49822	3.00934
MACS_peak_2841	chr7	5157135	5157597	Intergenic	26811	ZNF890P	14.4555	4.04113	2.08185	2.63317
MACS_peak_3270	chr8	142955452	142955827	Intergenic	-302061	MIR4472-1	14.4555	4.04113	4.58007	3.38551
MACS_peak_1854	chr20	45702669	45703136	exon	-92707	MIR3616	14.4555	4.04113	2.08185	3.76167
MACS_peak_1926	chr20	57426416	57426891	promoter-TSS	-695	GNAS-AS1	14.4555	4.49015	1.66548	3.00934
MACS_peak_1812	chr20	4605295	4605805	Intergenic	-61247	PRNP	14.4555	4.49015	0.832739	1.88084
MACS_peak_418	chr11	58162606	58163080	Intergenic	8039	OR5B3	14.4555	4.49015	1.66548	3.76167
MACS_peak_134	chr1	116840573	116841063	Intergenic	-74977	ATP1A1	14.4555	4.49015	2.08185	1.50467
MACS_peak_3204	chr8	140769675	140770169	intron	-54623	KCNK9	14.4555	4.49015	3.74733	2.63317
MACS_peak_2856	chr7	5478861	5479310	Intergenic	-15908	TNRC18	14.4555	4.93916	1.24911	1.88084
MACS_peak_747	chr15	21315789	21316147	Intergenic	170201	LOC348120	14.4555	4.93916	1.24911	3.00934
MACS_peak_3066	chr8	82117248	82117740	Intergenic	-75224	FABP5	14.4555	4.93916	1.66548	1.88084
MACS_peak_629	chr14	57264647	57265112	Intergenic	7502	OTX2	14.4555	4.93916	0.832739	1.50467
MACS_peak_227	chr10	37037419	37037870	Intergenic	-377141	ANKRD30A	14.4555	4.93916	0.832739	1.88084
MACS_peak_3315	chr8	143465145	143465739	intron	19101	TSNARE1	14.4555	5.38818	3.74733	5.26634
MACS_peak_2897	chr7	6768517	6769015	Intergenic	-6170	PMS2CL	14.4555	5.83719	3.74733	4.13784
MACS_peak_3412	chr8	145934071	145934612	Intergenic	46629	ZNF251	14.4555	5.83719	2.08185	4.13784
MACS_peak_2206	chr3	29742964	29743445	intron	420401	RBMS3	14.4555	5.83719	0.41637	0.376167
MACS_peak_2524	chr5	132800945	132801363	intron	-37756	MIR1289-2	14.4555	6.28621	2.91459	1.50467
MACS_peak_3351	chr8	144651577	144652122	intron	3079	C8orf73	14.4555	6.28621	3.74733	2.63317
MACS_peak_1925	chr20	57196225	57196698	Intergenic	-29848	STX16	14.4555	6.28621	0.832739	3.00934
MACS_peak_1330	chr19	36748227	36748711	Intergenic	-42483	ZNF565	14.4555	6.28621	0.41637	0.376167
MACS_peak_690	chr14	68602178	68602591	intron	315888	RAD51B	14.4555	6.28621	2.08185	1.88084
MACS_peak_2956	chr7	55193718	55194229	intron	62669	LOC100507500	14.4555	6.73522	1.66548	3.76167
MACS_peak_625	chr14	55778797	55779193	intron	40123	FBXO34	14.4555	6.73522	0.832739	1.88084
MACS_peak_3347	chr8	144497034	144497504	Intergenic	15333	MAFA	14.4555	7.18424	2.08185	4.51401
MACS_peak_2936	chr7	44738428	44738925	intron	-49854	ZMIZ2	14.4555	7.63325	1.66548	1.88084
MACS_peak_3305	chr8	143411110	143411544	intron	73216	TSNARE1	14.4555	7.63325	1.24911	1.50467
MACS_peak_2527	chr5	133909385	133909827	intron	47808	PHF15	14.4555	7.63325	0.832739	0.376167
MACS_peak_1700	chr2	102133266	102133772	Intergenic	-42354	RFX8	14.4555	8.08227	1.66548	2.63317
MACS_peak_1554	chr2	24338898	24339378	intron	7013	PFN4	14.4555	8.08227	3.33096	2.257
MACS_peak_2338	chr4	49324991	49325388	Intergenic	336924	CWH43	14.4555	8.53128	4.1637	3.38551
MACS_peak_1856	chr20	45769896	45770416	intron	-25453	MIR3616	14.4555	8.98029	2.49822	2.63317
MACS_peak_2790	chr7	4014643	4015169	intron	-154411	SDK1	14.4555	8.98029	2.49822	3.00934
MACS_peak_1657	chr2	89857645	89858196	Intergenic	746036	MIR4436A	14.4555	9.42931	4.58007	5.26634
MACS_peak_1948	chr20	61208242	61208693	Intergenic	46348	MIR133A2	14.4555	9.87832	2.08185	2.63317
MACS_peak_2895	chr7	6742641	6743081	intron	3705	ZNF12	14.4555	12.1234	1.24911	4.13784
MACS_peak_1003	chr17	36103744	36104273	intron	1088	HNF1B	13.8532	0.898029	0.41637	0.376167
MACS_peak_554	chr12	133486507	133486894	Intergenic	-22496	CHFR	13.8532	0.898029	1.24911	1.1285
MACS_peak_532	chr12	111744909	111745334	intron	61804	FAM109A	13.8532	0.898029	0.832739	0.752335
MACS_peak_2357	chr4	58833113	58833599	Intergenic	-856805	IGFBP7	13.8532	1.34704	1.24911	1.1285
MACS_peak_1708	chr2	106927056	106927466	Intergenic	-71309	PLGLA	13.8532	1.79606	1.24911	2.63317
MACS_peak_3377	chr8	145786565	145786983	intron	-32316	C8orf82	13.8532	1.79606	2.91459	1.88084
MACS_peak_2117	chr22	35887134	35887666	Intergenic	-49952	RASD2	13.8532	1.79606	2.91459	1.88084
MACS_peak_2734	chr7	1543308	1543732	intron	498	INTS1	13.8532	1.79606	2.49822	5.64251
MACS_peak_1867	chr20	46687300	46687699	Intergenic	-272139	SULF2	13.8532	2.24507	1.24911	0.752335
MACS_peak_2501	chr5	72231105	72231528	Intergenic	-20492	FCHO2	13.8532	2.24507	2.08185	1.88084
MACS_peak_64	chr1	41497014	41497518	intron	-9839	SLFNL1	13.8532	2.69409	3.74733	4.13784
MACS_peak_3109	chr8	122679637	122680091	Intergenic	-26234	HAS2	13.8532	2.69409	0.832739	1.50467
MACS_peak_501	chr12	14627201	14627659	intron	93361	PLBD1	13.8532	2.69409	1.66548	3.76167
MACS_peak_1246	chr18	77677257	77677740	intron	34155	PQLC1	13.8532	2.69409	1.66548	0.376167
MACS_peak_2729	chr7	1376361	1376742	Intergenic	103897	UNCX	13.8532	2.69409	4.1637	3.00934
MACS_peak_917	chr16	70949643	70950074	intron	-114797	VAC14	13.8532	3.1431	2.91459	0.376167
MACS_peak_3350	chr8	144516776	144517193	Intergenic	-4382	MAFA	13.8532	3.1431	1.24911	2.257
MACS_peak_3540	chr9	137339401	137339956	Intergenic	68421	MIR4669	13.8532	3.1431	2.91459	1.50467
MACS_peak_3074	chr8	87977990	87978557	intron	99597	CNBD1	13.8532	3.1431	1.66548	2.63317
MACS_peak_2429	chr5	12661983	12662488	intron	87266	TAG	13.8532	3.1431	1.24911	0
MACS_peak_254	chr10	42640703	42641065	Intergenic	222609	LOC441666	13.8532	3.1431	2.91459	5.26634
MACS_peak_2128	chr22	39185632	39186071	intron	4310	DNAL4	13.8532	3.59212	2.49822	3.38551
MACS_peak_3313	chr8	143454025	143454438	intron	30312	TSNARE1	13.8532	3.59212	2.49822	3.76167
MACS_peak_2562	chr5	171682570	171683091	intron	27965	UBTD2	13.8532	3.59212	0.832739	1.50467
MACS_peak_861	chr16	28993157	28993585	exon	-2776	LAT	13.8532	4.04113	1.66548	2.257
MACS_peak_523	chr12	51751276	51751731	intron	-11040	CELA1	13.8532	4.04113	1.66548	1.88084
MACS_peak_2124	chr22	37722774	37723241	Intergenic	44512	CYTH4	13.8532	4.04113	4.1637	3.00934
MACS_peak_474	chr12	1611117	1611555	intron	1679	LOC100292680	13.8532	4.49015	1.66548	1.50467
MACS_peak_529	chr12	96818496	96818949	Intergenic	-24356	CDK17	13.8532	4.49015	2.08185	1.1285
MACS_peak_2021	chr22	22813752	22814125	Intergenic	49567	ZNF280B	13.8532	4.49015	2.08185	1.1285
MACS_peak_721	chr14	73245421	73245892	intron	115153	DPF3	13.8532	4.49015	4.1637	3.38551
MACS_peak_1859	chr20	46318991	46319420	intron	95603	SULF2	13.8532	4.49015	2.49822	3.38551
MACS_peak_620	chr14	52733925	52734406	promoter-TSS	-266	PTGDR	13.8532	4.93916	2.91459	1.1285
MACS_peak_2754	chr7	1914180	1914689	intron	-30545	MIR4655	13.8532	4.93916	2.08185	3.00934
MACS_peak_2102	chr22	35255136	35255607	Intergenic	-206759	ISX	13.8532	4.93916	1.24911	2.257
MACS_peak_30	chr1	23691719	23692193	intron	2923	ZNF436	13.8532	5.38818	1.24911	3.00934
MACS_peak_1387	chr19	38041410	38041870	promoter-TSS	-633	ZNF540	13.8532	5.38818	2.91459	3.38551
MACS_peak_1892	chr20	50703576	50704012	intron	104730	ZFP64	13.8532	5.38818	2.49822	1.1285
MACS_peak_479	chr12	3699943	3700390	intron	99802	PRMT8	13.8532	5.38818	2.08185	1.50467
MACS_peak_1553	chr2	24337388	24337780	TTS	8567	PFN4	13.8532	5.38818	3.33096	3.76167
MACS_peak_110	chr1	95195940	95196355	Intergenic	-89751	SLC44A3	13.8532	5.38818	1.66548	1.1285
MACS_peak_3189	chr8	140706509	140706957	intron	8566	KCNK9	13.8532	5.38818	1.66548	2.257
MACS_peak_2937	chr7	44739041	44739489	intron	-49265	ZMIZ2	13.8532	5.83719	1.24911	3.38551
MACS_peak_1562	chr2	26940775	26941330	intron	25471	KCNK3	13.8532	5.83719	2.91459	1.88084
MACS_peak_1516	chr19	58707002	58707495	intron	12852	ZNF274	13.8532	5.83719	0.41637	0.752335
MACS_peak_1865	chr20	46635478	46636056	Intergenic	-220407	SULF2	13.8532	5.83719	0.41637	3.00934
MACS_peak_3234	chr8	140997806	140998211	intron	-282709	KCNK9	13.8532	5.83719	0.41637	2.257
MACS_peak_827	chr16	3275059	3275594	intron	9764	OR1F2P	13.8532	5.83719	0.41637	1.88084
MACS_peak_1124	chr17	80692073	80692571	Intergenic	-1130	FN3K	13.8532	6.28621	0	0.752335
MACS_peak_3238	chr8	141045514	141045925	intron	-330420	KCNK9	13.8532	6.28621	2.08185	2.257
MACS_peak_2339	chr4	49325407	49325724	Intergenic	337300	CWH43	13.8532	6.73522	2.49822	3.00934
MACS_peak_783	chr15	67047392	67047854	intron	46693	SMAD6	13.8532	7.18424	2.49822	2.257
MACS_peak_451	chr11	86308951	86309387	intron	74071	ME3	13.8532	7.18424	0	0.376167
MACS_peak_492	chr12	12800865	12801330	Intergenic	36266	CREBL2	13.8532	7.18424	4.58007	3.00934
MACS_peak_1412	chr19	44354500	44355065	Intergenic	23309	ZNF283	13.8532	7.18424	2.08185	2.63317
MACS_peak_2833	chr7	5110084	5110645	intron	-1327	LOC389458	13.8532	7.63325	4.1637	1.88084
MACS_peak_3445	chr8	146198159	146198622	TTS	-21861	TMED10P1	13.8532	7.63325	3.33096	2.257
MACS_peak_2406	chr5	1539877	1540357	Intergenic	-16041	LPCAT1	13.8532	7.63325	1.24911	1.88084
MACS_peak_3295	chr8	143395598	143396068	intron	88710	TSNARE1	13.8532	8.08227	3.33096	1.50467
MACS_peak_3161	chr8	136125746	136126334	Intergenic	-120334	LOC286094	13.8532	8.08227	4.1637	3.76167
MACS_peak_3355	chr8	144749852	144750464	Intergenic	-16464	ZNF707	13.8532	8.53128	4.58007	2.63317
MACS_peak_3348	chr8	144498092	144498539	Intergenic	14287	MAFA	13.8532	8.98029	2.08185	2.63317
MACS_peak_1627	chr2	66017148	66017558	Intergenic	-357697	SPRED2	13.2509	0.898029	1.24911	4.13784
MACS_peak_2224	chr3	47401020	47401453	Intergenic	-21255	PTPN23	13.2509	1.34704	1.24911	2.63317
MACS_peak_1799	chr2	241465357	241465817	intron	31818	ANKMY1	13.2509	1.34704	0.832739	0.752335
MACS_peak_1642	chr2	86727264	86727690	Intergenic	58893	KDM3A	13.2509	1.79606	1.24911	0.752335
MACS_peak_126	chr1	111506427	111506896	promoter-TSS	-95	LRIF1	13.2509	1.79606	1.24911	1.50467
MACS_peak_194	chr1	247352091	247352531	Intergenic	13051	MIR3916	13.2509	2.24507	2.49822	0.752335
MACS_peak_3183	chr8	140656837	140657254	intron	58254	KCNK9	13.2509	2.24507	1.24911	2.257
MACS_peak_2789	chr7	3776737	3777154	intron	-392372	SDK1	13.2509	2.69409	2.49822	1.1285
MACS_peak_1743	chr2	129224682	129225133	Intergenic	-148736	HS6ST1	13.2509	2.69409	0.41637	0.376167
MACS_peak_320	chr10	71998667	71999098	Intergenic	-5692	PPA1	13.2509	2.69409	1.66548	1.50467
MACS_peak_2132	chr22	40066746	40067205	intron	100217	CACNA1I	13.2509	2.69409	2.49822	1.88084
MACS_peak_572	chr12	133769138	133769508	intron	11263	ZNF268	13.2509	2.69409	0	0.752335
MACS_peak_1052	chr17	60216508	60216910	Intergenic	-74066	MED13	13.2509	3.1431	2.08185	1.1285
MACS_peak_936	chr16	82042395	82042758	intron	2517	SDR42E1	13.2509	3.1431	1.24911	1.50467
MACS_peak_3118	chr8	124766464	124766883	Intergenic	-14209	FAM91A1	13.2509	3.1431	2.08185	1.1285
MACS_peak_1533	chr2	9997584	9998054	intron	14248	TAF1B	13.2509	3.1431	1.24911	1.88084
MACS_peak_15	chr1	11411443	11411861	Intergenic	78397	UBIAD1	13.2509	3.1431	1.24911	1.1285
MACS_peak_2453	chr5	32712504	32712951	intron	1289	NPR3	13.2509	3.59212	1.66548	1.1285
MACS_peak_3175	chr8	139384409	139384882	intron	124420	FAM135B	13.2509	3.59212	1.24911	3.76167
MACS_peak_761	chr15	28700912	28701371	Intergenic	29504	MIR4509-2	13.2509	3.59212	2.08185	2.257
MACS_peak_3290	chr8	143383090	143383472	intron	101262	TSNARE1	13.2509	3.59212	1.66548	1.50467
MACS_peak_169	chr1	223288535	223288932	intron	27891	TLR5	13.2509	3.59212	1.24911	1.50467
MACS_peak_660	chr14	64056165	64056625	Intergenic	-46316	PPP2R5E	13.2509	4.04113	3.33096	2.257
MACS_peak_569	chr12	133704804	133705218	Intergenic	-2203	ZNF10	13.2509	4.04113	2.49822	1.1285
MACS_peak_303	chr10	50633770	50634168	Intergenic	-34062	DRGX	13.2509	4.04113	0.41637	2.257
MACS_peak_3316	chr8	143499674	143500110	Intergenic	-15349	TSNARE1	13.2509	4.04113	2.08185	4.13784
MACS_peak_2566	chr5	177388083	177388529	Intergenic	34937	PROP1	13.2509	4.04113	0	0.376167
MACS_peak_2424	chr5	9478122	9478556	intron	67894	SEMA5A	13.2509	4.04113	2.08185	1.50467
MACS_peak_1455	chr19	49693721	49694156	intron	32922	TRPM4	13.2509	4.04113	0.832739	3.00934
MACS_peak_2503	chr5	73188083	73188480	intron	78938	ARHGEF28	13.2509	4.04113	1.24911	1.88084
MACS_peak_3494	chr9	68988974	68989407	Intergenic	158664	PGM5P2	13.2509	4.04113	2.91459	1.1285
MACS_peak_619	chr14	52675049	52675557	Intergenic	-59128	PTGDR	13.2509	4.04113	1.66548	2.257
MACS_peak_2008	chr22	19710310	19710754	promoter-TSS	-534	GP1BB	13.2509	4.49015	1.24911	1.50467
MACS_peak_3257	chr8	142566554	142566989	Intergenic	-49441	FLJ43860	13.2509	4.49015	0.41637	1.1285
MACS_peak_2244	chr3	99898495	99898989	Intergenic	-5926	TMEM30C	13.2509	4.49015	0.832739	2.257
MACS_peak_1426	chr19	44471100	44471522	exon	15914	ZNF221	13.2509	4.49015	2.08185	1.50467
MACS_peak_1203	chr18	14102031	14102475	3' UTR	30236	ZNF519	13.2509	4.49015	2.49822	3.00934
MACS_peak_1335	chr19	36941145	36941545	intron	29269	LOC644189	13.2509	4.49015	2.08185	0.752335
MACS_peak_2946	chr7	47817054	47817559	intron	16232	LINC00525	13.2509	4.49015	4.1637	2.257
MACS_peak_2354	chr4	56219729	56220101	intron	7527	SRD5A3	13.2509	4.49015	1.66548	0.752335
MACS_peak_2351	chr4	54806408	54806931	Intergenic	46780	RPL21P44	13.2509	4.93916	2.49822	3.00934
MACS_peak_3413	chr8	145935068	145935503	Intergenic	45685	ZNF251	13.2509	4.93916	2.91459	3.00934
MACS_peak_2806	chr7	4459295	4459722	Intergenic	-262422	FOXK1	13.2509	4.93916	2.91459	3.00934
MACS_peak_2768	chr7	2070611	2071140	intron	-186986	MIR4655	13.2509	4.93916	3.74733	3.76167
MACS_peak_3542	chr9	137458729	137459206	Intergenic	-74685	COL5A1	13.2509	4.93916	1.24911	1.50467
MACS_peak_151	chr1	152080567	152081105	exon	5720	TCHH	13.2509	4.93916	2.49822	2.257
MACS_peak_3208	chr8	140787977	140788422	intron	-72900	KCNK9	13.2509	4.93916	2.08185	0.376167
MACS_peak_833	chr16	3356924	3357399	intron	-1722	TIGD7	13.2509	5.38818	3.33096	1.1285
MACS_peak_926	chr16	74761116	74761713	intron	-26625	MLKL	13.2509	5.38818	2.08185	1.88084
MACS_peak_440	chr11	76192207	76192595	intron	36332	C11orf30	13.2509	5.38818	0.832739	1.50467
MACS_peak_3389	chr8	145825862	145826378	intron	12768	ARHGAP39	13.2509	5.38818	1.66548	3.00934
MACS_peak_2324	chr4	49119875	49120276	Intergenic	131810	CWH43	13.2509	5.83719	2.91459	4.13784
MACS_peak_1436	chr19	44977337	44977827	Intergenic	-24917	ZNF229	13.2509	6.28621	0.41637	2.257
MACS_peak_3075	chr8	88527236	88527677	Intergenic	358840	DCAF4L2	13.2509	6.28621	1.24911	1.1285
MACS_peak_390	chr11	1093185	1093614	exon	18524	MUC2	13.2509	6.28621	2.08185	0.376167
MACS_peak_2430	chr5	13244076	13244523	Intergenic	669330	TAG	13.2509	6.28621	2.08185	0.752335
MACS_peak_1596	chr2	43511262	43511697	intron	57129	LOC100129726	13.2509	6.28621	4.1637	1.88084
MACS_peak_3409	chr8	145932307	145932778	Intergenic	48428	ZNF251	13.2509	6.73522	2.49822	2.63317
MACS_peak_1278	chr19	12738005	12738489	intron	16515	ZNF791	13.2509	6.73522	0.41637	1.88084
MACS_peak_241	chr10	42373751	42374147	Intergenic	489544	LOC441666	13.2509	7.18424	2.08185	4.89018
MACS_peak_242	chr10	42375315	42375866	Intergenic	487903	LOC441666	13.2509	7.18424	3.33096	2.63317
MACS_peak_27	chr1	23688481	23688895	exon	6191	ZNF436	13.2509	7.18424	1.24911	0.376167
MACS_peak_2972	chr7	61100130	61100466	Intergenic	1664136	LOC643955	13.2509	7.63325	4.1637	5.26634
MACS_peak_575	chr12	133780195	133780675	exon	22375	ZNF268	13.2509	7.63325	2.49822	1.1285
MACS_peak_3000	chr7	64387477	64387859	intron	24048	ZNF273	13.2509	7.63325	1.24911	1.88084
MACS_peak_1213	chr18	19610663	19611163	Intergenic	-138491	GATA6	13.2509	7.63325	2.08185	2.63317
MACS_peak_2002	chr21	47481696	47482282	Intergenic	-36044	COL6A2	13.2509	8.08227	3.33096	1.1285
MACS_peak_3133	chr8	130681840	130682313	Intergenic	117058	GSDMC	13.2509	8.08227	2.91459	2.63317
MACS_peak_2882	chr7	6715174	6715709	Intergenic	31125	ZNF12	13.2509	8.08227	3.74733	6.01868
MACS_peak_1530	chr19	58775709	58776151	TTS	-14388	ZNF8	13.2509	8.53128	0.832739	1.1285
MACS_peak_1204	chr18	14107729	14108181	intron	24534	ZNF519	13.2509	8.53128	0.832739	2.257
MACS_peak_592	chr13	113843119	113843584	intron	19611	PCID2	13.2509	9.42931	3.33096	3.38551
MACS_peak_2600	chr6	34486375	34486755	intron	3916	PACSIN1	12.6486	0.898029	1.66548	1.50467
MACS_peak_724	chr14	73850438	73850916	intron	74609	NUMB	12.6486	0.898029	2.91459	3.76167
MACS_peak_3024	chr7	80700276	80700664	Intergenic	-151803	SEMA3C	12.6486	1.34704	2.08185	0.376167
MACS_peak_2970	chr7	57466088	57466563	Intergenic	-6406	MIR3147	12.6486	1.34704	0.832739	0
MACS_peak_2696	chr7	300791	301147	TTS	-29167	LOC100288524	12.6486	1.79606	0.41637	0.376167
MACS_peak_1702	chr2	102761669	102762042	Intergenic	-8547	IL1R1	12.6486	1.79606	0.832739	0.752335
MACS_peak_989	chr17	21318559	21318974	exon	10318	KCNJ18	12.6486	1.79606	1.66548	1.50467
MACS_peak_1323	chr19	35654878	35655265	exon	9226	FXYD5	12.6486	2.24507	2.49822	1.1285
MACS_peak_3010	chr7	70542666	70543142	Intergenic	-54885	WBSCR17	12.6486	2.24507	0.832739	0.752335
MACS_peak_2755	chr7	1973869	1974206	intron	-90148	MIR4655	12.6486	2.24507	2.08185	1.50467
MACS_peak_613	chr14	50493451	50493927	Intergenic	-19451	C14orf182	12.6486	2.24507	2.91459	1.1285
MACS_peak_2085	chr22	28925745	28926063	intron	149949	TTC28	12.6486	2.24507	2.08185	3.38551
MACS_peak_2745	chr7	1835250	1835653	Intergenic	48438	MIR4655	12.6486	2.24507	2.08185	1.88084
MACS_peak_1022	chr17	44877372	44877830	intron	18481	WNT3	12.6486	2.24507	1.24911	1.88084
MACS_peak_3219	chr8	140856834	140857272	intron	-141754	KCNK9	12.6486	2.69409	2.49822	3.76167
MACS_peak_938	chr16	84070267	84070723	exon	5267	SLC38A8	12.6486	2.69409	1.24911	1.88084
MACS_peak_1752	chr2	133036160	133036625	Intergenic	-20850	ANKRD30BL	12.6486	2.69409	0	2.257
MACS_peak_2014	chr22	20714601	20715027	Intergenic	-33591	ZNF74	12.6486	2.69409	0.832739	1.50467
MACS_peak_2404	chr5	1464060	1464512	intron	-18743	SLC6A3	12.6486	2.69409	0.41637	0.752335
MACS_peak_3135	chr8	130810412	130810780	Intergenic	-11462	GSDMC	12.6486	2.69409	0.832739	2.257
MACS_peak_475	chr12	1964952	1965378	intron	35732	LRTM2	12.6486	2.69409	1.66548	0.376167
MACS_peak_2507	chr5	89073252	89073707	Intergenic	239058	MIR3660	12.6486	2.69409	0.832739	1.50467
MACS_peak_1868	chr20	46735364	46735751	Intergenic	-253097	LINC00494	12.6486	3.1431	2.08185	1.88084
MACS_peak_1377	chr19	37722998	37723452	intron	5859	ZNF383	12.6486	3.1431	0.832739	2.63317
MACS_peak_1688	chr2	97096357	97096817	Intergenic	77259	NEURL3	12.6486	3.1431	2.08185	1.88084
MACS_peak_2227	chr3	49272309	49272783	intron	35613	CCDC36	12.6486	3.1431	0.832739	2.257
MACS_peak_1614	chr2	56899834	56900399	Intergenic	488858	CCDC85A	12.6486	3.1431	0.832739	0.752335
MACS_peak_478	chr12	3515110	3515582	intron	24831	PRMT8	12.6486	3.1431	0.832739	1.88084
MACS_peak_1513	chr19	58698166	58698536	exon	3955	ZNF274	12.6486	3.59212	0.832739	1.50467
MACS_peak_321	chr10	71999632	72000081	Intergenic	-6666	PPA1	12.6486	3.59212	1.24911	2.257
MACS_peak_1649	chr2	89064337	89064805	promoter-TSS	-848	ANKRD36BP2	12.6486	3.59212	0.41637	1.1285
MACS_peak_1448	chr19	46793558	46793997	intron	-6526	HIF3A	12.6486	3.59212	0.41637	1.1285
MACS_peak_2523	chr5	132730107	132730604	intron	33043	MIR1289-2	12.6486	3.59212	0.832739	0.376167
MACS_peak_208	chr10	22819407	22819876	Intergenic	-92783	LOC100499489	12.6486	3.59212	2.49822	0.752335
MACS_peak_3235	chr8	140998241	140998712	intron	-283177	KCNK9	12.6486	3.59212	2.49822	2.63317
MACS_peak_3274	chr8	143009567	143010014	Intergenic	-247910	MIR4472-1	12.6486	3.59212	2.08185	1.88084
MACS_peak_986	chr17	19557531	19557924	intron	5663	ALDH3A2	12.6486	3.59212	0	0
MACS_peak_3081	chr8	99952621	99953043	intron	1967	STK3	12.6486	4.04113	1.66548	1.50467
MACS_peak_656	chr14	62907954	62908360	Intergenic	324082	LINC00643	12.6486	4.04113	4.1637	1.50467
MACS_peak_2500	chr5	71747853	71748304	intron	55171	ZNF366	12.6486	4.04113	1.66548	0.752335
MACS_peak_1394	chr19	38590492	38590883	exon	124203	DPF1	12.6486	4.04113	1.24911	1.50467
MACS_peak_3098	chr8	119351599	119352146	intron	-227814	EXT1	12.6486	4.04113	2.91459	2.63317
MACS_peak_1987	chr21	32615048	32615513	intron	-204485	KRTAP19-8	12.6486	4.04113	1.66548	3.76167
MACS_peak_1691	chr2	98340673	98341016	exon	-10025	ZAP70	12.6486	4.49015	2.49822	1.50467
MACS_peak_468	chr11	119253290	119253803	intron	1058	LOC100499227	12.6486	4.49015	1.24911	0.376167
MACS_peak_2246	chr3	105121993	105122582	intron	36730	ALCAM	12.6486	4.49015	2.91459	2.63317
MACS_peak_1130	chr17	80930677	80931130	intron	78783	B3GNTL1	12.6486	4.49015	2.08185	3.00934
MACS_peak_309	chr10	60208104	60208547	Intergenic	63422	TFAM	12.6486	4.49015	1.66548	1.50467
MACS_peak_2840	chr7	5148101	5148499	Intergenic	35877	ZNF890P	12.6486	4.49015	2.49822	5.64251
MACS_peak_3457	chr9	27177370	27177742	intron	68409	TEK	12.6486	4.49015	2.49822	4.89018
MACS_peak_3185	chr8	140670582	140671052	intron	44482	KCNK9	12.6486	4.49015	2.91459	3.00934
MACS_peak_2955	chr7	55193254	55193652	intron	63189	LOC100507500	12.6486	4.49015	1.24911	1.50467
MACS_peak_2565	chr5	172633856	172634420	Intergenic	28177	NKX2-5	12.6486	4.49015	0.832739	1.50467
MACS_peak_2316	chr4	45568968	45569366	Intergenic	556915	GABRG1	12.6486	4.49015	0.832739	0.376167
MACS_peak_487	chr12	9506465	9506937	Intergenic	70448	LOC642846	12.6486	4.49015	1.24911	3.38551
MACS_peak_1082	chr17	70974600	70974994	intron	114056	SLC39A11	12.6486	4.49015	0.41637	3.76167
MACS_peak_1400	chr19	40538282	40538733	3' UTR	23608	ZNF780B	12.6486	4.49015	1.66548	0.752335
MACS_peak_263	chr10	42861876	42862247	intron	1432	LOC441666	12.6486	4.93916	2.49822	2.257
MACS_peak_3471	chr9	35508676	35509082	intron	18872	RUSC2	12.6486	4.93916	1.66548	2.257
MACS_peak_2078	chr22	28099648	28100064	Intergenic	97630	MN1	12.6486	4.93916	2.49822	3.76167
MACS_peak_2884	chr7	6718156	6718612	Intergenic	28182	ZNF12	12.6486	4.93916	2.49822	2.63317
MACS_peak_539	chr12	120837753	120838211	Intergenic	-30999	MSI1	12.6486	5.38818	2.08185	1.50467
MACS_peak_1316	chr19	33194583	33194920	intron	11884	NUDT19	12.6486	5.38818	1.24911	0.376167
MACS_peak_3382	chr8	145810494	145810891	intron	28196	ARHGAP39	12.6486	5.38818	1.66548	2.257
MACS_peak_928	chr16	75055819	75056222	intron	23105	ZNRF1	12.6486	5.38818	1.66548	1.50467
MACS_peak_642	chr14	60893928	60894332	Intergenic	58634	C14orf39	12.6486	5.38818	2.08185	3.38551
MACS_peak_698	chr14	69383985	69384370	intron	61906	ACTN1	12.6486	5.38818	2.08185	0.752335
MACS_peak_2096	chr22	33779453	33779863	intron	52997	MIR4764	12.6486	5.38818	0.832739	1.1285
MACS_peak_2207	chr3	31084316	31084745	Intergenic	-148377	GADL1	12.6486	5.38818	1.24911	2.63317
MACS_peak_1492	chr19	56896571	56897051	intron	8078	ZNF582	12.6486	5.38818	2.08185	1.88084
MACS_peak_1231	chr18	76609477	76609858	Intergenic	-130608	SALL3	12.6486	5.38818	3.74733	1.1285
MACS_peak_3555	chr9	140711659	140712121	intron	-20981	MIR602	12.6486	5.83719	0.41637	0.752335
MACS_peak_3364	chr8	144994378	144994779	exon	19180	PLEC	12.6486	5.83719	1.24911	3.76167
MACS_peak_2741	chr7	1767806	1768238	intron	19224	ELFN1	12.6486	5.83719	2.49822	1.1285
MACS_peak_164	chr1	204395849	204396303	intron	-15132	PPP1R15B	12.6486	6.28621	2.08185	1.50467
MACS_peak_2307	chr4	41186598	41186985	intron	29844	APBB2	12.6486	6.28621	2.08185	0.752335
MACS_peak_1009	chr17	38633793	38634215	intron	23850	TNS4	12.6486	6.73522	2.49822	1.88084
MACS_peak_297	chr10	44647418	44647825	Intergenic	-140577	LOC100130539	12.6486	6.73522	0.41637	1.88084
MACS_peak_1853	chr20	45702168	45702586	intron	-93232	MIR3616	12.6486	6.73522	1.66548	3.00934
MACS_peak_2264	chr3	127609919	127610273	Intergenic	-31806	KBTBD12	12.6486	7.18424	0.832739	1.50467
MACS_peak_3275	chr8	143017742	143018192	Intergenic	-239733	MIR4472-1	12.6486	7.18424	1.66548	1.1285
MACS_peak_801	chr15	83711436	83711814	intron	-24462	MIR4515	12.6486	7.63325	0.832739	1.1285
MACS_peak_2724	chr7	1060933	1061400	intron	1496	MIR339	12.6486	7.63325	1.24911	1.88084
MACS_peak_2471	chr5	40680952	40681561	exon	1224	PTGER4	12.6486	7.63325	1.66548	3.00934
MACS_peak_2880	chr7	6713894	6714336	Intergenic	32451	ZNF12	12.6486	8.08227	1.66548	1.1285
MACS_peak_3294	chr8	143392317	143392740	intron	92015	TSNARE1	12.6486	8.53128	1.66548	3.38551
MACS_peak_826	chr16	3273422	3273780	3' UTR	8039	OR1F2P	12.6486	8.98029	2.49822	1.50467
MACS_peak_2879	chr7	6713012	6713442	Intergenic	33339	ZNF12	12.6486	9.87832	1.66548	3.00934
MACS_peak_2343	chr4	49516833	49517304	Intergenic	528803	CWH43	12.6486	11.6744	3.74733	5.64251
MACS_peak_144	chr1	143537267	143537626	Intergenic	-149684	LOC100130000	12.6486	11.6744	0.832739	3.76167
MACS_peak_1755	chr2	133427370	133427786	5' UTR	903	LYPD1	12.0463	0	2.08185	1.50467
MACS_peak_2615	chr6	39281576	39281925	TTS	486	KCNK17	12.0463	0.898029	1.24911	0.376167
MACS_peak_1482	chr19	53087979	53088362	3' UTR	-11767	ZNF137P	12.0463	0.898029	0.832739	0.752335
MACS_peak_2168	chr22	49694188	49694617	Intergenic	356788	C22orf34	12.0463	0.898029	0.41637	1.50467
MACS_peak_3266	chr8	142942793	142943184	Intergenic	-314712	MIR4472-1	12.0463	1.79606	2.08185	0.752335
MACS_peak_3228	chr8	140926429	140926784	intron	-211307	KCNK9	12.0463	1.79606	0.41637	1.50467
MACS_peak_1060	chr17	62368146	62368454	Intergenic	-27647	TEX2	12.0463	1.79606	2.08185	2.257
MACS_peak_464	chr11	115504572	115504972	Intergenic	126146	LOC283143	12.0463	1.79606	0.832739	0.376167
MACS_peak_3054	chr8	52183776	52184223	Intergenic	538006	PXDNL	12.0463	1.79606	0	0.752335
MACS_peak_1295	chr19	29920768	29921200	intron	95675	LOC284395	12.0463	1.79606	1.24911	1.50467
MACS_peak_3419	chr8	145954013	145954462	intron	26733	ZNF251	12.0463	1.79606	2.08185	3.38551
MACS_peak_1526	chr19	58764866	58765301	intron	25013	ZNF544	12.0463	1.79606	2.49822	2.257
MACS_peak_3279	chr8	143140214	143140641	Intergenic	-117273	MIR4472-1	12.0463	2.24507	2.49822	1.88084
MACS_peak_1064	chr17	63954981	63955425	intron	-132542	CEP112	12.0463	2.24507	2.08185	1.50467
MACS_peak_3392	chr8	145829397	145829849	intron	9265	ARHGAP39	12.0463	2.24507	2.91459	2.257
MACS_peak_117	chr1	110331189	110331560	Intergenic	-24730	EPS8L3	12.0463	2.24507	1.66548	3.00934
MACS_peak_1574	chr2	33141247	33141682	intron	-10730	LOC100271832	12.0463	2.24507	0.832739	1.1285
MACS_peak_1198	chr18	13765455	13765837	Intergenic	38942	RNMT	12.0463	2.24507	2.08185	1.50467
MACS_peak_3180	chr8	140556224	140556675	Intergenic	158850	KCNK9	12.0463	2.24507	0.832739	1.50467
MACS_peak_3352	chr8	144729208	144729657	intron	-2522	ZNF623	12.0463	2.24507	2.91459	4.13784
MACS_peak_2235	chr3	75719437	75719739	Intergenic	-1844	LOC401074	12.0463	2.24507	0.832739	0.752335
MACS_peak_3041	chr8	9304392	9304877	Intergenic	-108811	TNKS	12.0463	2.69409	2.08185	2.63317
MACS_peak_2000	chr21	44963044	44963412	intron	-65125	LINC00313	12.0463	2.69409	0	1.1285
MACS_peak_2183	chr22	50719620	50719952	intron	-11007	MAPK11	12.0463	2.69409	1.24911	0
MACS_peak_1129	chr17	80757992	80758349	intron	39761	ZNF750	12.0463	2.69409	0.832739	0.752335
MACS_peak_3461	chr9	28149710	28150132	intron	569382	LINGO2	12.0463	2.69409	2.08185	0
MACS_peak_296	chr10	44488073	44488526	Intergenic	83547	LOC283033	12.0463	2.69409	0.832739	1.1285
MACS_peak_2040	chr22	25608222	25608591	Intergenic	-7206	CRYBB2	12.0463	3.1431	1.24911	3.38551
MACS_peak_3543	chr9	137493020	137493377	Intergenic	-40454	COL5A1	12.0463	3.1431	2.91459	1.88084
MACS_peak_300	chr10	46970100	46970534	intron	284	SYT15	12.0463	3.1431	3.74733	4.13784
MACS_peak_3230	chr8	140937128	140937472	intron	-222001	KCNK9	12.0463	3.1431	0.832739	1.1285
MACS_peak_969	chr16	89654929	89655293	exon	12935	CPNE7	12.0463	3.1431	1.24911	2.257
MACS_peak_1062	chr17	63509642	63509998	Intergenic	47920	AXIN2	12.0463	3.1431	2.91459	1.50467
MACS_peak_2170	chr22	49776531	49776873	Intergenic	274488	C22orf34	12.0463	3.1431	2.08185	1.50467
MACS_peak_1356	chr19	37213192	37213564	Intergenic	33076	ZNF567	12.0463	3.1431	2.49822	1.88084
MACS_peak_2999	chr7	64385021	64385504	intron	21642	ZNF273	12.0463	3.1431	2.08185	0.752335
MACS_peak_3521	chr9	117047048	117047513	intron	-38023	ORM1	12.0463	3.59212	3.33096	2.63317
MACS_peak_2878	chr7	6711042	6711452	Intergenic	35319	ZNF12	12.0463	3.59212	0.41637	0.376167
MACS_peak_1401	chr19	40541566	40542007	exon	20329	ZNF780B	12.0463	3.59212	1.24911	0.752335
MACS_peak_1505	chr19	58596758	58597327	intron	12688	ZSCAN18	12.0463	3.59212	1.66548	0.376167
MACS_peak_3263	chr8	142878562	142878912	Intergenic	-361407	FLJ43860	12.0463	3.59212	0.832739	1.50467
MACS_peak_1184	chr18	13142047	13142384	Intergenic	-76571	C18orf1	12.0463	3.59212	2.91459	1.88084
MACS_peak_700	chr14	70050432	70050867	Intergenic	-9049	CCDC177	12.0463	4.04113	3.33096	3.38551
MACS_peak_19	chr1	18081650	18082053	promoter-TSS	43	ACTL8	12.0463	4.04113	0.832739	2.257
MACS_peak_2292	chr4	30723826	30724225	exon	1988	PCDH7	12.0463	4.04113	2.08185	2.257
MACS_peak_1910	chr20	56294922	56295303	Intergenic	-8520	PMEPA1	12.0463	4.04113	2.08185	1.1285
MACS_peak_3243	chr8	141134493	141134952	intron	333139	TRAPPC9	12.0463	4.04113	2.49822	0.752335
MACS_peak_1738	chr2	122789843	122790261	Intergenic	276931	TSN	12.0463	4.04113	2.08185	0.376167
MACS_peak_807	chr15	90554173	90554507	intron	9588	ZNF710	12.0463	4.04113	1.66548	0.752335
MACS_peak_1579	chr2	36851991	36852535	Intergenic	-26931	FEZ2	12.0463	4.49015	3.33096	4.51401
MACS_peak_427	chr11	66746330	66746691	Intergenic	3756	C11orf86	12.0463	4.49015	2.08185	1.1285
MACS_peak_2382	chr4	97663639	97664078	Intergenic	902619	PDHA2	12.0463	4.49015	1.24911	0.752335
MACS_peak_1343	chr19	37007343	37007682	intron	11736	ZNF260	12.0463	4.49015	1.66548	0.376167
MACS_peak_190	chr1	247157119	247157582	intron	14045	ZNF695	12.0463	4.49015	1.66548	0.376167
MACS_peak_1750	chr2	133011002	133011332	intron	3486	MIR663B	12.0463	4.93916	0.832739	0.376167
MACS_peak_1424	chr19	44420144	44420543	intron	-14388	LOC100505715	12.0463	4.93916	3.33096	2.257
MACS_peak_959	chr16	88609434	88609875	Intergenic	-27135	ZC3H18	12.0463	4.93916	2.91459	1.50467
MACS_peak_1447	chr19	45130347	45130775	intron	13621	IGSF23	12.0463	4.93916	0.41637	2.257
MACS_peak_3338	chr8	144151918	144152269	Intergenic	31414	C8orf31	12.0463	4.93916	2.91459	3.38551
MACS_peak_3435	chr8	146154767	146155209	TTS	21286	ZNF16	12.0463	4.93916	1.66548	3.76167
MACS_peak_2828	chr7	5097654	5098081	intron	12314	RBAK	12.0463	4.93916	3.33096	2.63317
MACS_peak_2081	chr22	28479598	28480039	intron	-163218	MIR3199-1	12.0463	4.93916	2.08185	3.76167
MACS_peak_835	chr16	3358445	3358793	intron	-3180	TIGD7	12.0463	5.38818	1.66548	1.1285
MACS_peak_705	chr14	71409067	71409427	intron	35125	PCNX	12.0463	5.38818	2.08185	1.88084
MACS_peak_528	chr12	65934526	65935047	Intergenic	262019	MSRB3	12.0463	5.38818	2.49822	3.76167
MACS_peak_2394	chr5	649783	650188	intron	37580	CEP72	12.0463	5.38818	0.832739	1.1285
MACS_peak_2979	chr7	62504542	62504948	Intergenic	259689	LOC643955	12.0463	5.38818	0.832739	1.1285
MACS_peak_1634	chr2	73765541	73765971	intron	103781	NAT8	12.0463	5.38818	1.24911	3.00934
MACS_peak_813	chr16	285718	286054	intron	1085	ITFG3	12.0463	5.83719	0.41637	1.1285
MACS_peak_1593	chr2	43339412	43339784	Intergenic	114147	ZFP36L2	12.0463	5.83719	2.08185	1.1285
MACS_peak_3138	chr8	131840401	131840833	intron	212218	ADCY8	12.0463	5.83719	0.41637	3.38551
MACS_peak_187	chr1	247150478	247150885	exon	20714	ZNF695	12.0463	5.83719	1.66548	0.752335
MACS_peak_2433	chr5	14254453	14254828	intron	110811	TRIO	12.0463	5.83719	0.832739	1.1285
MACS_peak_739	chr15	20486024	20486471	Intergenic	-1750	CHEK2P2	12.0463	6.28621	2.91459	1.1285
MACS_peak_2691	chr7	296445	296898	exon	-33465	LOC100288524	12.0463	6.28621	1.24911	2.63317
MACS_peak_3468	chr9	34532380	34532818	Intergenic	-9562	ENHO	12.0463	6.28621	1.66548	2.257
MACS_peak_858	chr16	14607366	14607777	intron	116557	PARN	12.0463	6.28621	2.49822	3.00934
MACS_peak_3441	chr8	146168923	146169271	intron	7177	ZNF16	12.0463	6.28621	1.66548	3.00934
MACS_peak_1058	chr17	61059840	61060335	intron	-26811	TANC2	12.0463	6.73522	3.33096	5.64251
MACS_peak_929	chr16	75199174	75199625	intron	16978	ZFP1	12.0463	6.73522	1.24911	3.00934
MACS_peak_1088	chr17	71481292	71481727	intron	158718	SDK2	12.0463	7.18424	3.33096	2.63317
MACS_peak_693	chr14	69082277	69082685	Intergenic	178150	ZFP36L1	12.0463	7.18424	2.91459	3.38551
MACS_peak_1921	chr20	57100598	57101063	intron	10395	APCDD1L-AS1	12.0463	7.63325	2.08185	3.76167
MACS_peak_2811	chr7	4523028	4523488	Intergenic	-198672	FOXK1	12.0463	7.63325	1.66548	3.38551
MACS_peak_1613	chr2	55155370	55155838	exon	81866	RTN4	12.0463	8.08227	3.33096	2.63317
MACS_peak_543	chr12	124809422	124809782	3' UTR	35892	FAM101A	12.0463	8.08227	0.41637	0
MACS_peak_2434	chr5	14255872	14256288	intron	112251	TRIO	12.0463	8.08227	1.66548	1.50467
MACS_peak_2113	chr22	35829396	35829844	Intergenic	33504	MCM5	12.0463	8.08227	1.24911	0.752335
MACS_peak_1897	chr20	51096128	51096586	Intergenic	-287833	ZFP64	12.0463	8.08227	1.24911	3.00934
MACS_peak_512	chr12	34361536	34361827	Intergenic	186465	ALG10	11.444	0.898029	1.66548	0
MACS_peak_1341	chr19	36972043	36972371	intron	8130	ZNF566	11.444	1.34704	0.41637	0.752335
MACS_peak_2976	chr7	62059966	62060367	Intergenic	704268	LOC643955	11.444	1.34704	0	0.376167
MACS_peak_3300	chr8	143401285	143401636	intron	83083	TSNARE1	11.444	1.34704	1.24911	1.1285
MACS_peak_2857	chr7	5544596	5544913	intron	8645	FBXL18	11.444	1.79606	2.49822	1.88084
MACS_peak_3032	chr7	99669901	99670321	intron	9260	ZNF3	11.444	1.79606	2.08185	2.257
MACS_peak_152	chr1	152191144	152191521	exon	5337	HRNR	11.444	1.79606	1.24911	0.376167
MACS_peak_1114	chr17	79156786	79157151	TTS	-17096	AATK	11.444	1.79606	2.08185	0.376167
MACS_peak_193	chr1	247294868	247295313	intron	-19371	C1orf229	11.444	1.79606	1.66548	0.752335
MACS_peak_1225	chr18	74951378	74951854	Intergenic	-10392	GALR1	11.444	1.79606	1.24911	0.376167
MACS_peak_2449	chr5	29296760	29297197	Intergenic	370001	LSP1P3	11.444	1.79606	0.41637	1.1285
MACS_peak_2784	chr7	2983583	2984025	intron	99705	CARD11	11.444	1.79606	2.91459	2.257
MACS_peak_2302	chr4	38999758	39000116	intron	34104	TMEM156	11.444	1.79606	0.832739	1.1285
MACS_peak_2023	chr22	23418553	23418987	intron	6101	GNAZ	11.444	2.24507	1.66548	1.50467
MACS_peak_3287	chr8	143356213	143356640	intron	76709	LINC00051	11.444	2.24507	1.66548	1.1285
MACS_peak_1418	chr19	44371123	44371508	Intergenic	12973	ZNF404	11.444	2.24507	0.41637	1.50467
MACS_peak_262	chr10	42860759	42861197	intron	2515	LOC441666	11.444	2.24507	0.832739	1.50467
MACS_peak_150	chr1	152080072	152080427	exon	6307	TCHH	11.444	2.69409	0.41637	1.50467
MACS_peak_183	chr1	244378701	244379106	Intergenic	-137034	C1orf100	11.444	2.69409	2.91459	2.257
MACS_peak_1797	chr2	240110255	240110641	intron	6705	MGC16025	11.444	2.69409	0.832739	0.752335
MACS_peak_2950	chr7	51014430	51014861	Intergenic	-153486	GRB10	11.444	2.69409	0.41637	1.88084
MACS_peak_1941	chr20	60683081	60683478	Intergenic	-14238	LSM14B	11.444	2.69409	1.66548	2.257
MACS_peak_2199	chr3	15467407	15467693	intron	1492	METTL6	11.444	2.69409	1.66548	1.88084
MACS_peak_2850	chr7	5467284	5467690	Intergenic	-4310	TNRC18	11.444	2.69409	2.08185	3.76167
MACS_peak_264	chr10	42882801	42883220	Intergenic	-19517	LOC441666	11.444	2.69409	2.08185	1.88084
MACS_peak_122	chr1	110520739	110521125	Intergenic	-6455	AHCYL1	11.444	2.69409	1.66548	1.1285
MACS_peak_1989	chr21	32751298	32751730	intron	179776	TIAM1	11.444	2.69409	2.91459	2.257
MACS_peak_3410	chr8	145932783	145933074	Intergenic	48042	ZNF251	11.444	2.69409	1.66548	1.88084
MACS_peak_2644	chr6	64740881	64741311	intron	384665	PHF3	11.444	2.69409	0.41637	2.257
MACS_peak_2685	chr6	170777092	170777440	Intergenic	85151	PSMB1	11.444	2.69409	0.832739	0.752335
MACS_peak_1665	chr2	90480081	90480449	Intergenic	1367710	LOC654342	11.444	2.69409	3.33096	1.1285
MACS_peak_2044	chr22	25744252	25744662	Intergenic	14067	LRP5L	11.444	2.69409	2.08185	2.257
MACS_peak_2024	chr22	23788914	23789289	Intergenic	-44302	ZDHHC8P1	11.444	3.1431	1.66548	1.1285
MACS_peak_2109	chr22	35641538	35641871	Intergenic	-11741	HMGXB4	11.444	3.1431	1.66548	0.376167
MACS_peak_653	chr14	62423094	62423551	Intergenic	-39219	SYT16	11.444	3.1431	2.91459	1.50467
MACS_peak_784	chr15	67539236	67539636	intron	7638	AAGAB	11.444	3.1431	0.41637	1.88084
MACS_peak_2765	chr7	2068874	2069239	intron	-185167	MIR4655	11.444	3.1431	2.91459	3.00934
MACS_peak_855	chr16	11587310	11587723	Intergenic	92713	LITAF	11.444	3.1431	0.41637	1.50467
MACS_peak_1197	chr18	13677280	13677673	intron	49115	FAM210A	11.444	3.1431	2.08185	1.50467
MACS_peak_2990	chr7	63536636	63537059	intron	31026	ZNF727	11.444	3.1431	2.91459	1.1285
MACS_peak_3335	chr8	144052951	144053331	Intergenic	46666	LOC100133669	11.444	3.1431	0.832739	1.88084
MACS_peak_596	chr13	114430022	114430484	intron	23809	LINC00552	11.444	3.1431	2.91459	1.88084
MACS_peak_1563	chr2	27816995	27817353	intron	11338	ZNF512	11.444	3.1431	1.66548	0.752335
MACS_peak_83	chr1	45571718	45572079	intron	94093	UROD	11.444	3.1431	0.832739	1.88084
MACS_peak_781	chr15	66706304	66706655	intron	27268	MAP2K1	11.444	3.1431	3.33096	2.63317
MACS_peak_1364	chr19	37287271	37287625	Intergenic	-1004	ZNF790-AS1	11.444	3.59212	1.24911	0.752335
MACS_peak_2	chr1	1886179	1886524	3' UTR	-35611	TMEM52	11.444	3.59212	0.832739	0.376167
MACS_peak_1997	chr21	35539034	35539427	Intergenic	-13748	LINC00310	11.444	3.59212	0.832739	0.752335
MACS_peak_1165	chr18	9866573	9866949	Intergenic	-18962	TXNDC2	11.444	3.59212	2.49822	2.63317
MACS_peak_3557	chr9	140728593	140728942	intron	-4104	MIR602	11.444	3.59212	0.832739	0
MACS_peak_3167	chr8	136702610	136703012	Intergenic	233095	KHDRBS3	11.444	3.59212	1.24911	0.752335
MACS_peak_329	chr10	76103251	76103735	intron	167246	ADK	11.444	3.59212	0.41637	2.63317
MACS_peak_1996	chr21	35496993	35497358	intron	51305	SLC5A3	11.444	3.59212	1.66548	1.1285
MACS_peak_3296	chr8	143396089	143396409	intron	88294	TSNARE1	11.444	3.59212	0.832739	0.752335
MACS_peak_662	chr14	64184076	64184390	intron	10523	SGPP1	11.444	3.59212	2.08185	2.257
MACS_peak_1	chr1	1426069	1426491	intron	19116	ATAD3B	11.444	3.59212	1.66548	0.752335
MACS_peak_2756	chr7	1974988	1975389	intron	-91299	MIR4655	11.444	3.59212	0	1.50467
MACS_peak_1692	chr2	99438691	99439144	exon	-91328	MGAT4A	11.444	3.59212	1.24911	0.752335
MACS_peak_3210	chr8	140805554	140805982	intron	-90469	KCNK9	11.444	3.59212	0.41637	2.257
MACS_peak_789	chr15	69221193	69221559	intron	-1463	SPESP1	11.444	4.04113	1.24911	1.50467
MACS_peak_624	chr14	55571197	55571576	Intergenic	-24549	LGALS3	11.444	4.04113	2.49822	0.376167
MACS_peak_2795	chr7	4163490	4163892	intron	-5626	SDK1	11.444	4.04113	3.74733	2.257
MACS_peak_1586	chr2	39586996	39587433	intron	77239	MAP4K3	11.444	4.04113	3.74733	2.63317
MACS_peak_2334	chr4	49216531	49216974	Intergenic	228487	CWH43	11.444	4.04113	0.832739	2.63317
MACS_peak_3245	chr8	141200789	141201257	intron	266838	TRAPPC9	11.444	4.04113	1.66548	2.257
MACS_peak_2632	chr6	52827400	52827878	Intergenic	32539	GSTA4	11.444	4.04113	2.49822	1.50467
MACS_peak_1744	chr2	129225833	129226235	Intergenic	-149863	HS6ST1	11.444	4.04113	1.24911	1.88084
MACS_peak_325	chr10	74740649	74741210	Intergenic	-26419	PLA2G12B	11.444	4.49015	2.08185	1.88084
MACS_peak_1098	chr17	75130844	75131248	intron	-5959	SEC14L1	11.444	4.49015	3.74733	2.257
MACS_peak_3158	chr8	135708883	135709292	promoter-TSS	-286	ZFAT	11.444	4.49015	0.832739	2.63317
MACS_peak_2322	chr4	49111490	49111790	Intergenic	123375	CWH43	11.444	4.49015	2.91459	1.50467
MACS_peak_1577	chr2	36701552	36701969	intron	118390	CRIM1	11.444	4.49015	2.49822	0.752335
MACS_peak_1269	chr19	9672988	9673331	Intergenic	22050	ZNF121	11.444	4.49015	0.41637	0.752335
MACS_peak_2381	chr4	95246526	95246910	intron	17309	HPGDS	11.444	4.49015	1.66548	1.50467
MACS_peak_383	chr10	134491909	134492216	intron	107475	NKX6-2	11.444	4.49015	0.41637	1.1285
MACS_peak_896	chr16	46421748	46421894	Intergenic	181188	ANKRD26P1	11.444	4.49015	3.33096	2.257
MACS_peak_1819	chr20	29857600	29858003	Intergenic	12334	DEFB115	11.444	4.49015	1.66548	1.1285
MACS_peak_2663	chr6	134358422	134358737	intron	15210	SLC2A12	11.444	4.49015	1.24911	0.376167
MACS_peak_2098	chr22	35184854	35185297	Intergenic	-277055	ISX	11.444	4.49015	2.49822	2.257
MACS_peak_1235	chr18	77333399	77333778	Intergenic	-106213	CTDP1	11.444	4.49015	0.832739	2.63317
MACS_peak_2722	chr7	915543	915997	promoter-TSS	-421	GET4	11.444	4.93916	2.91459	1.50467
MACS_peak_2201	chr3	16206004	16206387	Intergenic	-9989	GALNTL2	11.444	4.93916	1.66548	2.257
MACS_peak_3293	chr8	143391684	143392124	intron	92639	TSNARE1	11.444	4.93916	3.74733	1.88084
MACS_peak_644	chr14	61424534	61424933	intron	23049	TRMT5	11.444	4.93916	2.08185	2.63317
MACS_peak_1587	chr2	39748775	39749176	intron	84418	LOC728730	11.444	4.93916	1.66548	2.63317
MACS_peak_1773	chr2	202295110	202295454	intron	21037	TRAK2	11.444	4.93916	0.832739	0.376167
MACS_peak_1557	chr2	25117912	25118265	intron	23967	ADCY3	11.444	4.93916	1.66548	1.50467
MACS_peak_1127	chr17	80700751	80701157	intron	7502	FN3K	11.444	4.93916	0.832739	1.88084
MACS_peak_971	chr16	89972815	89973215	intron	-11272	MC1R	11.444	5.38818	0.832739	1.1285
MACS_peak_3254	chr8	142558971	142559441	Intergenic	-41876	FLJ43860	11.444	5.38818	1.66548	0.752335
MACS_peak_2143	chr22	45966530	45966962	intron	68027	FBLN1	11.444	5.38818	1.24911	0.752335
MACS_peak_3477	chr9	37564035	37564380	intron	12043	FBXO10	11.444	5.38818	1.24911	0.752335
MACS_peak_946	chr16	85662490	85662881	intron	15761	GSE1	11.444	5.38818	0.41637	0.376167
MACS_peak_2083	chr22	28788765	28789228	intron	286857	TTC28	11.444	5.38818	1.24911	4.89018
MACS_peak_1053	chr17	60258707	60259135	Intergenic	94095	TBC1D3P2	11.444	5.38818	3.33096	1.88084
MACS_peak_1869	chr20	46926790	46927158	Intergenic	-61680	LINC00494	11.444	5.38818	2.08185	2.63317
MACS_peak_3194	chr8	140744960	140745345	intron	-29853	KCNK9	11.444	5.83719	1.66548	1.50467
MACS_peak_803	chr15	89609742	89610078	Intergenic	-21471	ABHD2	11.444	5.83719	1.24911	2.257
MACS_peak_2035	chr22	25323442	25323816	TTS	11685	TMEM211	11.444	5.83719	3.74733	2.63317
MACS_peak_1202	chr18	14101446	14101886	3' UTR	30823	ZNF519	11.444	5.83719	2.49822	1.50467
MACS_peak_961	chr16	89064513	89064848	Intergenic	-21176	CBFA2T3	11.444	6.28621	0.41637	1.1285
MACS_peak_840	chr16	3366721	3367157	exon	-11500	TIGD7	11.444	6.28621	0.832739	2.63317
MACS_peak_1382	chr19	37881057	37881486	3' UTR	19212	ZNF527	11.444	6.28621	0.41637	2.63317
MACS_peak_3375	chr8	145780306	145780745	intron	-26067	C8orf82	11.444	6.73522	2.08185	1.88084
MACS_peak_376	chr10	127577228	127577626	Intergenic	-7543	DHX32	11.444	6.73522	2.49822	5.26634
MACS_peak_1091	chr17	71569901	71570337	intron	70108	SDK2	11.444	6.73522	2.91459	1.1285
MACS_peak_1974	chr21	11181499	11181894	Intergenic	-82759	BAGE	11.444	6.73522	2.08185	3.76167
MACS_peak_3496	chr9	69817253	69817578	Intergenic	166054	LOC100133920	11.444	7.18424	2.49822	2.63317
MACS_peak_3334	chr8	144017106	144017559	Intergenic	-18073	CYP11B2	11.444	7.63325	2.08185	4.89018
MACS_peak_3450	chr8	146206779	146207224	intron	-13250	TMED10P1	11.444	7.63325	2.49822	5.26634
MACS_peak_902	chr16	46432998	46433165	Intergenic	169928	ANKRD26P1	11.444	8.08227	2.08185	2.63317
MACS_peak_1354	chr19	37207726	37208081	intron	27601	ZNF567	11.444	8.08227	0.41637	0.752335
MACS_peak_848	chr16	8428967	8429391	Intergenic	193047	TMEM114	11.444	9.87832	2.91459	1.50467
MACS_peak_2969	chr7	57312923	57313264	Intergenic	-65230	GUSBP10	10.8416	0.898029	1.66548	0.752335
MACS_peak_85	chr1	45750355	45750664	Intergenic	-19073	LOC400752	10.8416	0.898029	1.66548	0
MACS_peak_2209	chr3	33745823	33746180	intron	13704	CLASP2	10.8416	0.898029	0.832739	2.63317
MACS_peak_1521	chr19	58747455	58747780	intron	7547	ZNF544	10.8416	1.34704	1.66548	0.752335
MACS_peak_2469	chr5	38851469	38851787	intron	5527	OSMR	10.8416	1.34704	1.24911	1.88084
MACS_peak_3064	chr8	81857954	81858272	Intergenic	-71097	ZNF704	10.8416	1.34704	1.24911	0.376167
MACS_peak_131	chr1	115902626	115902926	Intergenic	-21919	NGF	10.8416	1.34704	0.41637	0
MACS_peak_2689	chr7	294049	294437	intron	-35893	LOC100288524	10.8416	1.34704	1.24911	0.752335
MACS_peak_398	chr11	7110457	7110821	exon	474	RBMXL2	10.8416	1.34704	0	1.1285
MACS_peak_428	chr11	66746840	66747192	Intergenic	4262	C11orf86	10.8416	1.34704	1.24911	4.13784
MACS_peak_87	chr1	45804413	45804774	promoter-TSS	-749	TOE1	10.8416	1.34704	0.832739	3.76167
MACS_peak_860	chr16	23546054	23546401	exon	22469	EARS2	10.8416	1.34704	0	1.1285
MACS_peak_1588	chr2	39813286	39813615	intron	-79188	TMEM178A	10.8416	1.79606	1.24911	0.752335
MACS_peak_2815	chr7	4696733	4697090	Intergenic	-25019	FOXK1	10.8416	1.79606	1.66548	1.1285
MACS_peak_305	chr10	54106569	54106962	Intergenic	32724	DKK1	10.8416	1.79606	1.24911	1.88084
MACS_peak_1443	chr19	44999866	45000264	intron	4509	ZNF180	10.8416	1.79606	0	0.752335
MACS_peak_1722	chr2	114736910	114737275	promoter-TSS	-54	LOC440900	10.8416	1.79606	0.832739	0.752335
MACS_peak_907	chr16	50707408	50707723	exon	7699	SNX20	10.8416	2.24507	1.24911	0
MACS_peak_1133	chr17	81002421	81002800	intron	7076	B3GNTL1	10.8416	2.24507	0.41637	2.63317
MACS_peak_1226	chr18	76252854	76253197	Intergenic	-487250	SALL3	10.8416	2.24507	0.41637	1.88084
MACS_peak_3190	chr8	140741795	140742192	TTS	-26694	KCNK9	10.8416	2.24507	1.66548	1.1285
MACS_peak_729	chr14	77210191	77210564	Intergenic	-17858	VASH1	10.8416	2.24507	2.08185	1.88084
MACS_peak_2375	chr4	88784912	88785223	Intergenic	-27928	HSP90AB3P	10.8416	2.24507	0.832739	0.376167
MACS_peak_1690	chr2	98106754	98106999	Intergenic	-15827	LOC100506123	10.8416	2.24507	0	0.376167
MACS_peak_5	chr1	2586117	2586498	intron	-21826	MMEL1	10.8416	2.24507	1.66548	0.752335
MACS_peak_854	chr16	11302008	11302382	Intergenic	47844	SOCS1	10.8416	2.24507	1.24911	3.76167
MACS_peak_1030	chr17	57000722	57001095	intron	167678	PPM1E	10.8416	2.24507	0	1.1285
MACS_peak_912	chr16	68597968	68598333	exon	24489	ZFP90	10.8416	2.24507	2.08185	1.1285
MACS_peak_1784	chr2	235156461	235156856	Intergenic	197312	SPP2	10.8416	2.24507	2.49822	1.1285
MACS_peak_2115	chr22	35869357	35869762	Intergenic	-67793	RASD2	10.8416	2.69409	2.91459	1.88084
MACS_peak_2924	chr7	38089261	38089598	Intergenic	-128379	STARD3NL	10.8416	2.69409	0.41637	2.257
MACS_peak_2570	chr5	178314612	178314974	Intergenic	-8123	ZFP2	10.8416	2.69409	0.41637	1.1285
MACS_peak_1939	chr20	60676443	60676787	Intergenic	-20902	LSM14B	10.8416	2.69409	1.24911	2.257
MACS_peak_1714	chr2	112797188	112797540	Intergenic	-15436	TMEM87B	10.8416	2.69409	0.832739	0.752335
MACS_peak_3488	chr9	66455692	66456086	Intergenic	-38380	PTGER4P2	10.8416	2.69409	2.49822	1.1285
MACS_peak_2474	chr5	41831681	41831958	intron	38972	OXCT1	10.8416	2.69409	1.66548	0
MACS_peak_3304	chr8	143410761	143411103	intron	73611	TSNARE1	10.8416	2.69409	1.24911	1.50467
MACS_peak_3034	chr7	108197127	108197571	Intergenic	12548	THAP5	10.8416	2.69409	1.24911	0.752335
MACS_peak_3365	chr8	144995673	144996080	exon	17882	PLEC	10.8416	2.69409	1.24911	1.50467
MACS_peak_3339	chr8	144173519	144173807	Intergenic	52984	C8orf31	10.8416	2.69409	0.41637	0.752335
MACS_peak_1143	chr18	1056455	1056839	Intergenic	151350	ADCYAP1	10.8416	2.69409	3.33096	4.13784
MACS_peak_3186	chr8	140673685	140674083	intron	41415	KCNK9	10.8416	2.69409	1.24911	2.63317
MACS_peak_195	chr1	247353734	247354165	Intergenic	11413	MIR3916	10.8416	2.69409	1.66548	3.00934
MACS_peak_1277	chr19	12736837	12737164	intron	15268	ZNF791	10.8416	2.69409	0.41637	1.50467
MACS_peak_2537	chr5	147435606	147436018	Intergenic	-7723	SPINK5	10.8416	3.1431	0	0.752335
MACS_peak_795	chr15	70113754	70114067	Intergenic	-13663	LINC00593	10.8416	3.1431	1.24911	1.1285
MACS_peak_1379	chr19	37807367	37807725	Intergenic	-18034	HKR1	10.8416	3.1431	0.832739	0
MACS_peak_1927	chr20	57446786	57447131	intron	-17222	GNAS	10.8416	3.1431	2.91459	1.1285
MACS_peak_2425	chr5	9731277	9731714	intron	-101032	TAS2R1	10.8416	3.1431	0.832739	1.1285
MACS_peak_997	chr17	26582728	26583084	Intergenic	8436	PPY2	10.8416	3.1431	0.41637	0.376167
MACS_peak_449	chr11	81697889	81698291	Intergenic	-96212	MIR4300	10.8416	3.1431	2.08185	0.752335
MACS_peak_751	chr15	22461636	22462039	Intergenic	48375	OR4N3P	10.8416	3.1431	1.66548	0.752335
MACS_peak_2623	chr6	42679334	42679773	intron	10805	PRPH2	10.8416	3.1431	2.49822	1.50467
MACS_peak_719	chr14	73235894	73236306	intron	124709	DPF3	10.8416	3.1431	1.66548	1.50467
MACS_peak_1224	chr18	74274893	74275270	Intergenic	34469	LOC284276	10.8416	3.1431	0.832739	1.1285
MACS_peak_2995	chr7	63987621	63988022	intron	35684	ZNF680	10.8416	3.1431	0.41637	1.1285
MACS_peak_100	chr1	68308587	68308966	intron	-9621	GNG12	10.8416	3.59212	0.832739	0.376167
MACS_peak_154	chr1	154474991	154475406	promoter-TSS	503	TDRD10	10.8416	3.59212	0.832739	0.376167
MACS_peak_3376	chr8	145785463	145785771	intron	-31159	C8orf82	10.8416	3.59212	1.66548	1.1285
MACS_peak_1805	chr2	242844752	242845177	Intergenic	33078	CXXC11	10.8416	3.59212	1.24911	1.1285
MACS_peak_759	chr15	27753831	27754194	intron	537583	GABRG3	10.8416	3.59212	1.66548	2.257
MACS_peak_1413	chr19	44355681	44356033	Intergenic	24384	ZNF283	10.8416	3.59212	1.66548	3.00934
MACS_peak_67	chr1	41869145	41869565	Intergenic	80989	EDN2	10.8416	3.59212	1.66548	1.50467
MACS_peak_663	chr14	64184550	64184896	intron	10033	SGPP1	10.8416	3.59212	2.91459	2.63317
MACS_peak_3484	chr9	44070665	44070820	Intergenic	-316645	LOC643648	10.8416	3.59212	1.24911	1.88084
MACS_peak_709	chr14	71726080	71726497	Intergenic	-138766	SNORD56B	10.8416	3.59212	1.24911	3.00934
MACS_peak_1086	chr17	71449544	71449912	intron	-141585	CDC42EP4	10.8416	3.59212	2.49822	3.76167
MACS_peak_1120	chr17	80653898	80654322	intron	2488	RAB40B	10.8416	4.04113	3.33096	1.50467
MACS_peak_2147	chr22	47151651	47152033	Intergenic	-6676	TBC1D22A	10.8416	4.04113	1.24911	2.63317
MACS_peak_99	chr1	63227074	63227410	Intergenic	-22535	ATG4C	10.8416	4.04113	1.66548	1.1285
MACS_peak_796	chr15	70114589	70115015	Intergenic	-12771	LINC00593	10.8416	4.04113	0.41637	2.257
MACS_peak_1840	chr20	42791705	42792067	intron	24332	JPH2	10.8416	4.04113	2.49822	2.63317
MACS_peak_1918	chr20	57053313	57053787	intron	36399	APCDD1L	10.8416	4.04113	2.08185	2.257
MACS_peak_766	chr15	42544185	42544642	intron	21342	TMEM87A	10.8416	4.04113	1.24911	1.50467
MACS_peak_1761	chr2	155958403	155958852	Intergenic	403534	KCNJ3	10.8416	4.04113	1.24911	1.1285
MACS_peak_707	chr14	71545491	71545806	intron	171526	PCNX	10.8416	4.04113	1.24911	0.376167
MACS_peak_1409	chr19	44344369	44344693	intron	13058	ZNF283	10.8416	4.04113	2.91459	3.00934
MACS_peak_2362	chr4	67578192	67578556	Intergenic	832882	CENPC1	10.8416	4.04113	1.24911	1.1285
MACS_peak_2994	chr7	63790580	63790904	intron	17556	ZNF736	10.8416	4.04113	0.832739	0.376167
MACS_peak_3508	chr9	99036428	99036846	intron	27797	HSD17B3	10.8416	4.04113	1.24911	0.752335
MACS_peak_2350	chr4	54698624	54698981	Intergenic	154647	RPL21P44	10.8416	4.04113	0.832739	0.752335
MACS_peak_1067	chr17	66391357	66391642	intron	29190	MIR635	10.8416	4.04113	0.832739	1.1285
MACS_peak_1625	chr2	65717693	65718049	Intergenic	-58215	SPRED2	10.8416	4.04113	2.49822	3.00934
MACS_peak_463	chr11	114458079	114458457	intron	8216	NXPE4	10.8416	4.04113	2.91459	1.50467
MACS_peak_3217	chr8	140849517	140849852	intron	-134385	KCNK9	10.8416	4.04113	0.832739	1.1285
MACS_peak_3095	chr8	118438792	118439099	Intergenic	-94020	MED30	10.8416	4.04113	1.24911	0.752335
MACS_peak_838	chr16	3360123	3360460	intron	-4852	TIGD7	10.8416	4.49015	1.66548	1.50467
MACS_peak_1650	chr2	89112231	89112667	TTS	565	MIR4436A	10.8416	4.49015	2.91459	1.50467
MACS_peak_1362	chr19	37260959	37261341	intron	2566	ZNF850	10.8416	4.49015	0.832739	0.376167
MACS_peak_2817	chr7	4698300	4698645	Intergenic	-23458	FOXK1	10.8416	4.49015	0.832739	1.50467
MACS_peak_919	chr16	71482965	71483341	exon	12964	ZNF23	10.8416	4.49015	2.91459	3.00934
MACS_peak_2222	chr3	45132455	45132842	intron	55266	CDCP1	10.8416	4.49015	1.24911	0.752335
MACS_peak_1830	chr20	33664571	33664953	intron	15856	TRPC4AP	10.8416	4.49015	0.832739	0.752335
MACS_peak_2909	chr7	30495210	30495546	intron	23015	NOD1	10.8416	4.49015	2.08185	1.88084
MACS_peak_1781	chr2	218942220	218942631	intron	8687	RUFY4	10.8416	4.49015	0.832739	1.50467
MACS_peak_3061	chr8	80032143	80032455	Intergenic	-314541	IL7	10.8416	4.49015	0.41637	1.1285
MACS_peak_2769	chr7	2071222	2071587	intron	-187515	MIR4655	10.8416	4.49015	1.24911	1.88084
MACS_peak_1522	chr19	58748652	58748988	intron	8750	ZNF544	10.8416	4.49015	0.41637	1.50467
MACS_peak_3404	chr8	145901196	145901644	Intergenic	-62532	ARHGAP39	10.8416	4.49015	0.832739	1.50467
MACS_peak_2005	chr22	19325070	19325512	intron	-46052	CLTCL1	10.8416	4.93916	2.91459	1.50467
MACS_peak_802	chr15	85164602	85164959	exon	-9911	SCAND2	10.8416	4.93916	0.832739	0.376167
MACS_peak_1793	chr2	238400457	238400849	intron	4775	MLPH	10.8416	4.93916	0.41637	1.50467
MACS_peak_1327	chr19	36721361	36721779	intron	-15584	ZNF565	10.8416	4.93916	2.49822	1.1285
MACS_peak_3301	chr8	143405018	143405461	intron	79304	TSNARE1	10.8416	4.93916	1.66548	2.63317
MACS_peak_1034	chr17	58565092	58565481	intron	38294	APPBP2	10.8416	4.93916	2.08185	1.88084
MACS_peak_788	chr15	69150027	69150403	intron	33912	MIR548H4	10.8416	4.93916	2.49822	2.63317
MACS_peak_2042	chr22	25741043	25741425	Intergenic	17290	LRP5L	10.8416	4.93916	1.66548	1.88084
MACS_peak_258	chr10	42831535	42832002	non-coding	31725	LOC441666	10.8416	4.93916	2.49822	3.38551
MACS_peak_681	chr14	67198688	67199103	intron	224770	GPHN	10.8416	4.93916	0.41637	2.257
MACS_peak_1287	chr19	28668452	28668828	Intergenic	-383792	LINC00662	10.8416	4.93916	2.08185	2.257
MACS_peak_2142	chr22	45399196	45399518	intron	5517	PHF21B	10.8416	4.93916	2.49822	0.376167
MACS_peak_3155	chr8	135478421	135478829	Intergenic	-131689	ZFAT-AS1	10.8416	4.93916	2.91459	1.50467
MACS_peak_2705	chr7	399287	399638	Intergenic	-19929	LOC442497	10.8416	5.38818	2.08185	1.1285
MACS_peak_1485	chr19	53306240	53306637	intron	-16404	ZNF600	10.8416	5.38818	1.24911	1.1285
MACS_peak_1403	chr19	40549224	40549679	intron	12664	ZNF780B	10.8416	5.38818	0.832739	1.88084
MACS_peak_676	chr14	66673348	66673756	Intergenic	-279557	LINC00238	10.8416	5.38818	1.66548	2.63317
MACS_peak_1567	chr2	28527557	28527920	intron	5588	LOC100505716	10.8416	5.38818	1.66548	4.13784
MACS_peak_2914	chr7	34934844	34935147	Intergenic	-61052	NPSR1-AS1	10.8416	5.38818	0	1.50467
MACS_peak_2786	chr7	3122183	3122624	Intergenic	-38894	CARD11	10.8416	5.83719	2.91459	4.89018
MACS_peak_1493	chr19	57037752	57038104	3' UTR	-12389	ZFP28	10.8416	5.83719	0.41637	0.376167
MACS_peak_3045	chr8	23216482	23216851	intron	22945	LOC100507156	10.8416	5.83719	0.41637	0.752335
MACS_peak_2263	chr3	127496335	127496780	intron	45168	MGLL	10.8416	5.83719	1.66548	0.752335
MACS_peak_1389	chr19	38128188	38128570	intron	17934	ZFP30	10.8416	5.83719	1.66548	0.752335
MACS_peak_2609	chr6	37564374	37564789	Intergenic	-41383	MIR4462	10.8416	6.28621	0.832739	1.50467
MACS_peak_1759	chr2	147546020	147546383	Intergenic	201576	PABPC1P2	10.8416	6.28621	0	1.1285
MACS_peak_353	chr10	93363373	93363727	intron	7667	LOC100188947	10.8416	6.28621	1.24911	1.1285
MACS_peak_3240	chr8	141055225	141055599	intron	-340113	KCNK9	10.8416	6.28621	1.66548	1.50467
MACS_peak_1607	chr2	51378660	51379043	Intergenic	-119177	NRXN1	10.8416	6.28621	0.41637	1.1285
MACS_peak_2019	chr22	22305324	22305726	intron	1725	PPM1F	10.8416	6.73522	2.49822	3.76167
MACS_peak_1420	chr19	44379993	44380349	intron	4117	ZNF404	10.8416	6.73522	1.66548	1.50467
MACS_peak_28	chr1	23688959	23689314	exon	5743	ZNF436	10.8416	6.73522	1.66548	2.63317
MACS_peak_3548	chr9	138808071	138808457	Intergenic	-9259	CAMSAP1	10.8416	7.18424	1.66548	0.752335
MACS_peak_843	chr16	3432599	3432901	3' UTR	-10467	MTRNR2L4	10.8416	7.18424	0.832739	1.88084
MACS_peak_113	chr1	109327657	109327994	intron	38540	STXBP3	10.8416	7.18424	1.66548	0.752335
MACS_peak_1437	chr19	44981341	44981727	exon	23040	ZNF180	10.8416	8.08227	0.832739	2.257
MACS_peak_1988	chr21	32616628	32617087	intron	-206062	KRTAP19-8	10.8416	8.53128	2.08185	2.63317
MACS_peak_2310	chr4	41690601	41690962	intron	60206	PHOX2B	10.8416	10.3273	2.08185	1.88084
MACS_peak_1339	chr19	36948505	36948815	intron	31677	ZNF566	10.2393	0	1.24911	0.752335
MACS_peak_608	chr14	46403510	46403826	Intergenic	-681063	MIS18BP1	10.2393	0.449015	1.66548	1.50467
MACS_peak_1727	chr2	119761533	119761879	Intergenic	61961	MARCO	10.2393	0.449015	1.24911	1.88084
MACS_peak_2927	chr7	39363761	39364090	intron	82020	POU6F2-AS1	10.2393	0.449015	0.832739	2.63317
MACS_peak_3482	chr9	38621018	38621351	promoter-TSS	99	FAM201A	10.2393	0.898029	1.24911	0.752335
MACS_peak_748	chr15	21317223	21317525	Intergenic	171607	LOC348120	10.2393	0.898029	1.24911	1.50467
MACS_peak_467	chr11	116419031	116419397	Intergenic	224500	BUD13	10.2393	0.898029	1.24911	0.752335
MACS_peak_1777	chr2	216072435	216072736	Intergenic	-69434	ABCA12	10.2393	1.34704	0	0.376167
MACS_peak_2636	chr6	56297609	56297930	intron	-185391	COL21A1	10.2393	1.34704	1.24911	1.1285
MACS_peak_2650	chr6	72294349	72294741	Intergenic	-164097	LINC00472	10.2393	1.34704	0	1.1285
MACS_peak_410	chr11	44108592	44108868	Intergenic	-8369	EXT2	10.2393	1.34704	0.41637	1.50467
MACS_peak_1940	chr20	60682343	60682659	Intergenic	-15016	LSM14B	10.2393	1.34704	1.24911	1.1285
MACS_peak_1240	chr18	77592112	77592479	Intergenic	-31373	KCNG2	10.2393	1.34704	0	1.50467
MACS_peak_1111	chr17	78460783	78461117	Intergenic	-10546	NPTX1	10.2393	1.34704	2.49822	0.752335
MACS_peak_358	chr10	97411620	97411991	intron	4762	ALDH18A1	10.2393	1.34704	2.08185	1.1285
MACS_peak_132	chr1	116210042	116210393	intron	24967	VANGL1	10.2393	1.34704	1.24911	2.257
MACS_peak_3346	chr8	144493163	144493459	Intergenic	19291	MAFA	10.2393	1.34704	0.832739	1.50467
MACS_peak_2867	chr7	6678235	6678567	Intergenic	22874	ZNF853	10.2393	1.34704	2.49822	2.257
MACS_peak_456	chr11	103263079	103263492	intron	283125	DYNC2H1	10.2393	1.34704	0.832739	0.752335
MACS_peak_1050	chr17	60085043	60085429	intron	57407	MED13	10.2393	1.34704	1.24911	1.1285
MACS_peak_1838	chr20	42777728	42778114	intron	38297	JPH2	10.2393	1.34704	2.08185	0.752335
MACS_peak_2502	chr5	72677699	72678031	Intergenic	66487	FOXD1	10.2393	1.34704	0.832739	0.752335
MACS_peak_52	chr1	40922526	40922848	exon	6350	ZNF643	10.2393	1.79606	0.832739	1.88084
MACS_peak_792	chr15	69267942	69268336	intron	-38895	NOX5	10.2393	1.79606	0.832739	1.50467
MACS_peak_550	chr12	129332522	129332982	Intergenic	-5329	GLT1D1	10.2393	1.79606	1.24911	1.1285
MACS_peak_659	chr14	63541944	63542266	intron	26479	KCNH5	10.2393	1.79606	2.08185	1.50467
MACS_peak_973	chr16	90060187	90060485	intron	16193	DBNDD1	10.2393	1.79606	0.832739	1.88084
MACS_peak_1131	chr17	80931643	80931995	intron	77867	B3GNTL1	10.2393	1.79606	0	1.88084
MACS_peak_3343	chr8	144325798	144326137	Intergenic	-3024	ZFP41	10.2393	1.79606	0.832739	1.1285
MACS_peak_424	chr11	64785136	64785505	intron	3735	ARL2-SNX15	10.2393	1.79606	2.08185	1.88084
MACS_peak_2670	chr6	150285028	150285427	promoter-TSS	84	ULBP1	10.2393	1.79606	2.91459	0.752335
MACS_peak_2763	chr7	2018227	2018559	intron	-134504	MIR4655	10.2393	2.24507	1.66548	1.50467
MACS_peak_1626	chr2	65894307	65894630	Intergenic	-234812	SPRED2	10.2393	2.24507	0.832739	1.88084
MACS_peak_2788	chr7	3287628	3287988	Intergenic	-53272	SDK1	10.2393	2.24507	2.08185	2.257
MACS_peak_1110	chr17	78335043	78335357	intron	-53767	ENDOV	10.2393	2.24507	1.24911	2.257
MACS_peak_799	chr15	70547877	70548174	Intergenic	-157769	TLE3	10.2393	2.24507	2.91459	1.50467
MACS_peak_1502	chr19	58510285	58510606	intron	-3817	LOC100128398	10.2393	2.24507	1.24911	0.376167
MACS_peak_500	chr12	14504360	14504743	Intergenic	-14060	ATF7IP	10.2393	2.24507	1.24911	0.376167
MACS_peak_401	chr11	12061912	12062305	Intergenic	-31191	DKK3	10.2393	2.24507	1.24911	1.50467
MACS_peak_3195	chr8	140747153	140747547	intron	-32051	KCNK9	10.2393	2.24507	0.832739	3.38551
MACS_peak_1818	chr20	29834405	29834812	Intergenic	-10859	DEFB115	10.2393	2.24507	2.91459	1.1285
MACS_peak_128	chr1	113051117	113051417	promoter-TSS	-103	WNT2B	10.2393	2.24507	0.41637	0.376167
MACS_peak_3014	chr7	71877513	71877861	promoter-TSS	-327	CALN1	10.2393	2.24507	1.24911	1.1285
MACS_peak_63	chr1	41242064	41242469	Intergenic	-7418	KCNQ4	10.2393	2.24507	2.91459	0.752335
MACS_peak_155	chr1	159825245	159825641	promoter-TSS	-306	C1orf204	10.2393	2.24507	1.24911	1.1285
MACS_peak_2708	chr7	431411	431706	Intergenic	12167	LOC442497	10.2393	2.24507	1.24911	0.752335
MACS_peak_1208	chr18	14997963	14998311	Intergenic	167972	MIR3156-2	10.2393	2.24507	0	0.752335
MACS_peak_356	chr10	95279950	95280313	intron	23742	CEP55	10.2393	2.24507	1.66548	2.257
MACS_peak_718	chr14	73221675	73222068	intron	138938	DPF3	10.2393	2.24507	0.832739	3.00934
MACS_peak_1846	chr20	45130926	45131280	exon	11095	ZNF334	10.2393	2.24507	2.49822	1.50467
MACS_peak_1101	chr17	75170046	75170357	intron	-11094	SEC14L1	10.2393	2.69409	0.832739	0.752335
MACS_peak_2411	chr5	2750742	2751126	intron	835	IRX2	10.2393	2.69409	1.66548	0.752335
MACS_peak_591	chr13	113764623	113764954	intron	4686	F7	10.2393	2.69409	0.832739	1.50467
MACS_peak_1104	chr17	75516375	75516751	Intergenic	-26460	LOC100507351	10.2393	2.69409	1.66548	1.88084
MACS_peak_552	chr12	133188330	133188629	Intergenic	-1442	LRCOL1	10.2393	2.69409	1.66548	1.1285
MACS_peak_3378	chr8	145787833	145788150	intron	-33533	C8orf82	10.2393	2.69409	1.24911	2.63317
MACS_peak_2463	chr5	37269685	37269985	Intergenic	-20305	C5orf42	10.2393	2.69409	1.66548	1.1285
MACS_peak_49	chr1	40917452	40917846	intron	1312	ZNF643	10.2393	2.69409	2.91459	3.38551
MACS_peak_1556	chr2	25116413	25116818	intron	25440	ADCY3	10.2393	2.69409	1.66548	1.1285
MACS_peak_3181	chr8	140621615	140621983	Intergenic	93500	KCNK9	10.2393	2.69409	2.91459	3.00934
MACS_peak_2121	chr22	37568855	37569163	Intergenic	15321	C1QTNF6	10.2393	2.69409	0	1.88084
MACS_peak_2029	chr22	24272673	24272969	Intergenic	30547	GSTT2B	10.2393	2.69409	2.49822	2.257
MACS_peak_2261	chr3	126775208	126775619	Intergenic	67976	PLXNA1	10.2393	2.69409	1.24911	0.752335
MACS_peak_3504	chr9	95611242	95611646	intron	28876	ZNF484	10.2393	2.69409	1.66548	1.88084
MACS_peak_3127	chr8	127689341	127689695	Intergenic	-118807	FAM84B	10.2393	3.1431	1.24911	3.76167
MACS_peak_1855	chr20	45739316	45739686	intron	-56108	MIR3616	10.2393	3.1431	2.08185	1.88084
MACS_peak_507	chr12	22553120	22553529	Intergenic	-65676	ST8SIA1	10.2393	3.1431	1.66548	0.752335
MACS_peak_3465	chr9	31959738	31960115	Intergenic	-424675	ACO1	10.2393	3.1431	1.24911	1.88084
MACS_peak_1196	chr18	13548111	13548406	intron	-62855	MIR4526	10.2393	3.1431	0.832739	1.1285
MACS_peak_332	chr10	77043863	77044185	Intergenic	-12117	ZNF503-AS1	10.2393	3.1431	0	1.88084
MACS_peak_3071	chr8	86064923	86065224	Intergenic	-24546	E2F5	10.2393	3.1431	0.41637	0.376167
MACS_peak_2750	chr7	1910902	1911255	intron	-27189	MIR4655	10.2393	3.1431	2.08185	0.752335
MACS_peak_292	chr10	44393301	44393713	Intergenic	-11245	LOC283033	10.2393	3.1431	2.49822	3.00934
MACS_peak_2703	chr7	386980	387388	Intergenic	-32207	LOC442497	10.2393	3.1431	0	3.00934
MACS_peak_1542	chr2	11557547	11557924	Intergenic	23628	LINC00570	10.2393	3.1431	2.08185	1.1285
MACS_peak_2796	chr7	4219381	4219754	intron	50250	SDK1	10.2393	3.1431	2.49822	1.1285
MACS_peak_2747	chr7	1867013	1867379	intron	16693	MIR4655	10.2393	3.1431	0.41637	0.376167
MACS_peak_2923	chr7	36567296	36567665	intron	72246	AOAH-IT1	10.2393	3.1431	2.08185	2.257
MACS_peak_3529	chr9	132703765	132704077	intron	101552	FNBP1	10.2393	3.1431	1.66548	0.752335
MACS_peak_2740	chr7	1767383	1767790	intron	18788	ELFN1	10.2393	3.1431	2.49822	1.1285
MACS_peak_2214	chr3	43633006	43633333	intron	30391	ANO10	10.2393	3.1431	0	1.1285
MACS_peak_1581	chr2	37875803	37876192	intron	23345	CDC42EP3	10.2393	3.1431	1.24911	3.00934
MACS_peak_1768	chr2	172280624	172281000	intron	-9949	DCAF17	10.2393	3.59212	0	0.752335
MACS_peak_172	chr1	228278221	228278620	intron	-6544	MIR3620	10.2393	3.59212	1.66548	0.752335
MACS_peak_2823	chr7	4923197	4923509	promoter-TSS	-18	RADIL	10.2393	3.59212	0.832739	1.50467
MACS_peak_3537	chr9	136463213	136463557	Intergenic	-18017	FAM163B	10.2393	3.59212	1.24911	0
MACS_peak_3374	chr8	145779494	145779885	intron	-25231	C8orf82	10.2393	3.59212	1.24911	2.63317
MACS_peak_2676	chr6	161599518	161599917	intron	-16703	AGPAT4-IT1	10.2393	3.59212	1.66548	1.88084
MACS_peak_1351	chr19	37181926	37182243	intron	1782	ZNF567	10.2393	3.59212	1.24911	1.50467
MACS_peak_3434	chr8	146152884	146153252	Intergenic	23206	ZNF16	10.2393	3.59212	0.41637	1.88084
MACS_peak_430	chr11	69163309	69163631	Intergenic	101848	MYEOV	10.2393	3.59212	2.08185	1.88084
MACS_peak_1934	chr20	60444948	60445302	intron	83593	MIR1257	10.2393	3.59212	0.832739	0.376167
MACS_peak_561	chr12	133630107	133630386	intron	16266	ZNF84	10.2393	3.59212	0.832739	0.752335
MACS_peak_3232	chr8	140941906	140942244	intron	-226776	KCNK9	10.2393	3.59212	2.08185	0.752335
MACS_peak_728	chr14	76730265	76730736	Intergenic	6976	RNU6-6	10.2393	3.59212	2.08185	0.376167
MACS_peak_1070	chr17	66737214	66737559	Intergenic	-140291	FAM20A	10.2393	3.59212	1.24911	3.76167
MACS_peak_466	chr11	115939414	115939805	Intergenic	-308691	LOC283143	10.2393	3.59212	1.24911	1.88084
MACS_peak_2610	chr6	37569323	37569659	Intergenic	-46293	MIR4462	10.2393	4.04113	0.832739	1.1285
MACS_peak_2673	chr6	159154225	159154564	intron	31391	MIR3918	10.2393	4.04113	2.49822	1.88084
MACS_peak_1285	chr19	28266814	28267243	Intergenic	17820	LINC00662	10.2393	4.04113	3.33096	1.88084
MACS_peak_760	chr15	27979601	27980002	Intergenic	364657	OCA2	10.2393	4.04113	1.24911	1.1285
MACS_peak_2875	chr7	6702752	6703081	Intergenic	43650	ZNF12	10.2393	4.04113	2.49822	1.50467
MACS_peak_1308	chr19	30659748	30660088	Intergenic	-203410	ZNF536	10.2393	4.04113	1.24911	1.50467
MACS_peak_1112	chr17	78496520	78496832	Intergenic	-21949	RPTOR	10.2393	4.49015	1.66548	1.50467
MACS_peak_1444	chr19	45001170	45001460	intron	3259	ZNF180	10.2393	4.49015	0.832739	0
MACS_peak_319	chr10	71060694	71060986	intron	-14770	HK1	10.2393	4.49015	2.08185	0.752335
MACS_peak_384	chr10	134925125	134925424	intron	23865	GPR123	10.2393	4.49015	0.832739	1.88084
MACS_peak_2929	chr7	40378914	40379257	intron	204510	C7orf10	10.2393	4.49015	0.832739	1.88084
MACS_peak_1000	chr17	34441558	34441953	Intergenic	10535	CCL4	10.2393	4.49015	3.33096	3.38551
MACS_peak_3037	chr7	130000573	130000878	intron	16095	CPA5	10.2393	4.49015	0.832739	1.1285
MACS_peak_576	chr12	133780879	133781239	exon	22999	ZNF268	10.2393	4.49015	1.66548	1.88084
MACS_peak_1026	chr17	55547680	55548059	intron	213495	MSI2	10.2393	4.49015	1.66548	2.257
MACS_peak_2082	chr22	28558778	28559203	intron	-242390	MIR3199-1	10.2393	4.49015	2.08185	5.26634
MACS_peak_69	chr1	41995777	41996145	intron	-45617	EDN2	10.2393	4.93916	0.832739	1.50467
MACS_peak_1168	chr18	10506717	10507118	Intergenic	-18956	NAPG	10.2393	4.93916	1.66548	0.376167
MACS_peak_1336	chr19	36942648	36943034	intron	30765	LOC644189	10.2393	4.93916	2.49822	1.1285
MACS_peak_3042	chr8	12412271	12412680	intron	110645	LOC729732	10.2393	4.93916	3.33096	1.50467
MACS_peak_1452	chr19	47633045	47633428	promoter-TSS	-844	SAE1	10.2393	5.38818	2.08185	2.63317
MACS_peak_490	chr12	10907749	10908127	Intergenic	-31985	CSDA	10.2393	5.38818	0.832739	0.752335
MACS_peak_163	chr1	203863967	203864323	Intergenic	33405	SNRPE	10.2393	5.38818	1.66548	0.752335
MACS_peak_450	chr11	86236862	86237281	intron	146169	ME3	10.2393	5.38818	2.08185	1.1285
MACS_peak_2944	chr7	46506754	46507137	Intergenic	-546074	IGFBP3	10.2393	5.38818	2.91459	2.257
MACS_peak_2791	chr7	4015184	4015493	intron	-153979	SDK1	10.2393	5.38818	1.24911	0.752335
MACS_peak_1186	chr18	13198693	13198994	Intergenic	-19943	C18orf1	10.2393	5.83719	3.33096	2.257
MACS_peak_844	chr16	3432991	3433330	exon	-10877	MTRNR2L4	10.2393	5.83719	0	2.257
MACS_peak_1237	chr18	77490987	77491352	intron	49739	CTDP1	10.2393	5.83719	0.41637	0.376167
MACS_peak_2464	chr5	37270613	37270925	Intergenic	-21239	C5orf42	10.2393	6.28621	0.832739	3.76167
MACS_peak_3283	chr8	143242208	143242587	Intergenic	-15303	MIR4472-1	10.2393	6.28621	0.832739	1.1285
MACS_peak_188	chr1	247151952	247152330	intron	19254	ZNF695	10.2393	6.28621	0.832739	1.88084
MACS_peak_1923	chr20	57110773	57111117	intron	20510	APCDD1L-AS1	10.2393	6.28621	1.66548	1.88084
MACS_peak_326	chr10	75624111	75624464	intron	10062	CAMK2G	10.2393	6.28621	1.66548	3.38551
MACS_peak_2546	chr5	151190406	151190786	Intergenic	39120	G3BP1	10.2393	6.28621	1.24911	2.257
MACS_peak_670	chr14	65271403	65271815	intron	18257	SPTB	10.2393	6.73522	1.66548	2.257
MACS_peak_1396	chr19	39025774	39026200	exon	82656	MAP4K1	10.2393	6.73522	0.832739	1.50467
MACS_peak_3237	chr8	141044356	141044740	intron	-329249	KCNK9	10.2393	6.73522	1.66548	2.63317
MACS_peak_1498	chr19	58198071	58198445	exon	4921	ZNF551	10.2393	7.63325	0.41637	0.376167
MACS_peak_396	chr11	3382091	3382390	intron	18212	ZNF195	10.2393	7.63325	1.24911	0.376167
MACS_peak_21	chr1	19547058	19547405	intron	-10485	UBR4	10.2393	8.08227	1.24911	0.376167
MACS_peak_3203	chr8	140767289	140767624	intron	-52157	KCNK9	9.63702	0.449015	0.41637	1.50467
MACS_peak_2390	chr4	189378458	189378798	intron	1896	LOC401164	9.63702	0.449015	1.24911	1.88084
MACS_peak_3326	chr8	143856883	143857323	exon	1334	LYNX1	9.63702	0.449015	2.49822	3.00934
MACS_peak_1524	chr19	58755483	58755777	intron	15560	ZNF544	9.63702	0.449015	0.832739	0.752335
MACS_peak_774	chr15	62555981	62556381	Intergenic	-98699	C2CD4B	9.63702	0.898029	2.49822	1.1285
MACS_peak_2144	chr22	46405335	46405687	non-coding	3015	LOC730668	9.63702	0.898029	2.49822	0.752335
MACS_peak_1151	chr18	6414357	6414697	intron	383	L3MBTL4	9.63702	0.898029	0	0.376167
MACS_peak_1138	chr18	514147	514532	Intergenic	-13610	COLEC12	9.63702	0.898029	0.832739	0.752335
MACS_peak_352	chr10	92591843	92592240	intron	25630	HTR7	9.63702	0.898029	0.41637	0.752335
MACS_peak_595	chr13	114251827	114252177	intron	12946	TFDP1	9.63702	0.898029	0.832739	1.50467
MACS_peak_2584	chr5	179694844	179695167	intron	24066	MAPK9	9.63702	0.898029	0.41637	1.1285
MACS_peak_3463	chr9	29270241	29270486	Intergenic	-57365	LINGO2	9.63702	1.34704	0.41637	1.88084
MACS_peak_2860	chr7	5642275	5642584	intron	9993	FSCN1	9.63702	1.34704	0.832739	2.257
MACS_peak_1757	chr2	138473077	138473416	Intergenic	-248562	HNMT	9.63702	1.34704	0.832739	0.752335
MACS_peak_1318	chr19	33210586	33210968	promoter-TSS	98	TDRD12	9.63702	1.34704	0.832739	0
MACS_peak_2595	chr6	31168536	31168901	intron	3181	HCG27	9.63702	1.34704	2.08185	2.257
MACS_peak_3288	chr8	143380778	143381111	intron	101227	LINC00051	9.63702	1.34704	2.91459	0.376167
MACS_peak_3120	chr8	125679969	125680343	intron	60574	MTSS1	9.63702	1.34704	2.08185	1.88084
MACS_peak_2444	chr5	26852615	26852940	Intergenic	185912	CDH9	9.63702	1.34704	1.24911	0.752335
MACS_peak_2585	chr5	179708797	179709071	intron	10137	MAPK9	9.63702	1.34704	1.24911	0
MACS_peak_2980	chr7	62532125	62532489	Intergenic	232127	LOC643955	9.63702	1.34704	1.24911	1.88084
MACS_peak_2134	chr22	40633180	40633495	intron	59408	TNRC6B	9.63702	1.34704	1.24911	1.1285
MACS_peak_2714	chr7	682978	683281	intron	69032	PRKAR1B	9.63702	1.34704	2.91459	1.50467
MACS_peak_3272	chr8	142989727	142990043	Intergenic	-267815	MIR4472-1	9.63702	1.79606	1.24911	1.50467
MACS_peak_1575	chr2	34128714	34129065	Intergenic	-175605	MYADML	9.63702	1.79606	0.41637	0
MACS_peak_1119	chr17	80651315	80651601	intron	5140	RAB40B	9.63702	1.79606	1.66548	1.1285
MACS_peak_3550	chr9	138811149	138811548	Intergenic	-12343	CAMSAP1	9.63702	1.79606	1.66548	1.1285
MACS_peak_3317	chr8	143500636	143500942	Intergenic	-16246	TSNARE1	9.63702	1.79606	1.24911	1.88084
MACS_peak_499	chr12	14494313	14494743	Intergenic	-24083	ATF7IP	9.63702	1.79606	2.49822	1.50467
MACS_peak_2031	chr22	24623115	24623466	intron	17820	GGT5	9.63702	1.79606	0.832739	0.752335
MACS_peak_922	chr16	72982793	72983109	intron	99323	ZFHX3	9.63702	1.79606	1.24911	1.1285
MACS_peak_2305	chr4	40408887	40409186	Intergenic	71690	CHRNA9	9.63702	1.79606	0.41637	0.752335
MACS_peak_2166	chr22	49584396	49584852	Intergenic	322042	LOC100128946	9.63702	1.79606	1.24911	1.88084
MACS_peak_2555	chr5	159776402	159776757	exon	21069	C1QTNF2	9.63702	1.79606	0	0.376167
MACS_peak_2353	chr4	55523947	55524241	promoter-TSS	-1	KIT	9.63702	1.79606	0.41637	1.1285
MACS_peak_1572	chr2	31918741	31919006	Intergenic	-112833	SRD5A2	9.63702	2.24507	1.66548	1.1285
MACS_peak_1514	chr19	58701884	58702302	intron	7697	ZNF274	9.63702	2.24507	1.24911	1.1285
MACS_peak_3212	chr8	140817290	140817587	intron	-102139	KCNK9	9.63702	2.24507	0.832739	0
MACS_peak_1610	chr2	52798647	52798956	Intergenic	-1196128	CHAC2	9.63702	2.24507	0.832739	1.1285
MACS_peak_1959	chr20	62184550	62184936	intron	370	C20orf195	9.63702	2.24507	0.832739	3.38551
MACS_peak_2131	chr22	39658174	39658533	Intergenic	-17396	PDGFB	9.63702	2.24507	0.832739	0.752335
MACS_peak_2528	chr5	140696787	140697108	Intergenic	3404	TAF7	9.63702	2.24507	1.66548	0.376167
MACS_peak_1079	chr17	70634457	70634779	intron	1993	LINC00511	9.63702	2.24507	2.49822	1.50467
MACS_peak_2963	chr7	56521660	56521991	Intergenic	-5757	LOC650226	9.63702	2.24507	0	1.88084
MACS_peak_1115	chr17	79157486	79157937	TTS	-17839	AATK	9.63702	2.24507	0.41637	1.1285
MACS_peak_2230	chr3	56717323	56717655	promoter-TSS	-354	FAM208A	9.63702	2.24507	1.66548	1.1285
MACS_peak_1822	chr20	30193815	30194167	promoter-TSS	905	ID1	9.63702	2.24507	2.49822	1.50467
MACS_peak_1222	chr18	57013621	57013897	intron	12749	LMAN1	9.63702	2.24507	1.24911	0.752335
MACS_peak_1734	chr2	122428624	122428981	intron	21237	LOC254128	9.63702	2.24507	2.08185	0.376167
MACS_peak_3417	chr8	145944138	145944465	Intergenic	36669	ZNF251	9.63702	2.24507	1.24911	1.50467
MACS_peak_1860	chr20	46322708	46323037	intron	91936	SULF2	9.63702	2.24507	1.24911	0.376167
MACS_peak_344	chr10	80552898	80553166	Intergenic	274173	LOC283050	9.63702	2.24507	1.66548	1.1285
MACS_peak_2926	chr7	38223839	38224127	intron	6175	STARD3NL	9.63702	2.69409	1.24911	1.88084
MACS_peak_108	chr1	95083923	95084264	Intergenic	-76680	F3	9.63702	2.69409	1.24911	2.63317
MACS_peak_598	chr13	114526999	114527325	intron	8579	GAS6-AS1	9.63702	2.69409	1.66548	2.63317
MACS_peak_793	chr15	70053998	70054353	Intergenic	-73398	LINC00593	9.63702	2.69409	1.66548	1.88084
MACS_peak_2440	chr5	17517616	17517882	Intergenic	-130330	LOC401177	9.63702	2.69409	1.24911	2.63317
MACS_peak_945	chr16	85259390	85259781	Intergenic	-56979	LINC00311	9.63702	2.69409	0.832739	2.63317
MACS_peak_1866	chr20	46636457	46636777	Intergenic	-221257	SULF2	9.63702	2.69409	1.24911	1.50467
MACS_peak_3012	chr7	71252191	71252517	3' UTR	-479598	MIR3914-1	9.63702	2.69409	1.66548	0.376167
MACS_peak_777	chr15	62945594	62945944	intron	6259	TLN2	9.63702	2.69409	1.66548	1.1285
MACS_peak_770	chr15	59473250	59473607	intron	-9967	MIR2116	9.63702	2.69409	0.832739	1.88084
MACS_peak_207	chr10	22765116	22765498	Intergenic	-38449	LOC100499489	9.63702	2.69409	0.832739	1.1285
MACS_peak_2308	chr4	41351545	41351931	Intergenic	-11066	LIMCH1	9.63702	2.69409	0.832739	2.257
MACS_peak_2997	chr7	64030240	64030608	Intergenic	-6919	ZNF680	9.63702	2.69409	0.832739	1.1285
MACS_peak_423	chr11	63932086	63932443	intron	1321	MACROD1	9.63702	2.69409	0.832739	0.376167
MACS_peak_2818	chr7	4710209	4710526	Intergenic	-11563	FOXK1	9.63702	2.69409	2.08185	2.257
MACS_peak_2753	chr7	1913353	1913655	intron	-29615	MIR4655	9.63702	2.69409	1.66548	1.50467
MACS_peak_1375	chr19	37658490	37658834	intron	4671	ZNF585A	9.63702	2.69409	1.66548	1.1285
MACS_peak_1252	chr19	747517	747857	3' UTR	-3459	C19orf21	9.63702	2.69409	0.832739	1.50467
MACS_peak_725	chr14	75052815	75053106	intron	26074	LTBP2	9.63702	2.69409	1.24911	0.752335
MACS_peak_677	chr14	67041749	67042077	intron	67788	GPHN	9.63702	2.69409	2.91459	3.38551
MACS_peak_1641	chr2	86187592	86187907	Intergenic	63242	LOC90784	9.63702	2.69409	0.832739	0
MACS_peak_3358	chr8	144836490	144836856	Intergenic	20363	LOC100128338	9.63702	2.69409	2.49822	3.76167
MACS_peak_41	chr1	31345973	31346341	exon	35323	SDC3	9.63702	2.69409	0.41637	0
MACS_peak_1540	chr2	11239710	11240034	TTS	32430	FLJ33534	9.63702	2.69409	0.832739	1.88084
MACS_peak_1678	chr2	95877981	95878284	Intergenic	46949	ZNF2	9.63702	2.69409	0.832739	2.257
MACS_peak_1244	chr18	77660482	77660812	TTS	36979	KCNG2	9.63702	2.69409	0.832739	0.752335
MACS_peak_727	chr14	75054473	75054879	intron	24358	LTBP2	9.63702	2.69409	1.24911	2.63317
MACS_peak_1475	chr19	52853745	52854111	intron	5246	ZNF610	9.63702	3.1431	0.832739	0.376167
MACS_peak_3231	chr8	140940819	140941146	intron	-225683	KCNK9	9.63702	3.1431	2.08185	1.1285
MACS_peak_558	chr12	133568401	133568677	intron	5605	ZNF26	9.63702	3.1431	0.41637	0.376167
MACS_peak_38	chr1	27845475	27845833	Intergenic	-28976	WASF2	9.63702	3.1431	0.832739	0.752335
MACS_peak_80	chr1	44395885	44396275	non-coding	-2912	ARTN	9.63702	3.1431	1.66548	1.1285
MACS_peak_18	chr1	17391722	17392036	Intergenic	-11214	SDHB	9.63702	3.1431	1.66548	1.50467
MACS_peak_1294	chr19	29724649	29724970	Intergenic	-20673	UQCRFS1	9.63702	3.1431	0.41637	0.376167
MACS_peak_2383	chr4	100280747	100281122	Intergenic	-7017	ADH1C	9.63702	3.1431	0.41637	0.752335
MACS_peak_2517	chr5	121647864	121648206	intron	215	SNCAIP	9.63702	3.1431	0.832739	1.50467
MACS_peak_1495	chr19	58094613	58094910	promoter-TSS	-867	ZIK1	9.63702	3.1431	0.832739	1.50467
MACS_peak_1141	chr18	659715	660044	intron	-1539	C18orf56	9.63702	3.1431	1.66548	1.88084
MACS_peak_2538	chr5	149146144	149146502	intron	-5180	PPARGC1B	9.63702	3.1431	0.832739	2.63317
MACS_peak_2398	chr5	1040680	1041067	Intergenic	22216	MIR4635	9.63702	3.1431	1.24911	2.63317
MACS_peak_3530	chr9	133370074	133370368	intron	50127	ASS1	9.63702	3.1431	0.832739	1.1285
MACS_peak_1190	chr18	13315290	13315660	intron	96689	C18orf1	9.63702	3.1431	1.24911	2.63317
MACS_peak_3458	chr9	27252079	27252483	intron	30510	LINC00032	9.63702	3.1431	1.66548	1.50467
MACS_peak_278	chr10	43999828	44000127	Intergenic	63930	ZNF239	9.63702	3.1431	1.24911	1.50467
MACS_peak_1368	chr19	37369717	37370066	3' UTR	27338	ZNF345	9.63702	3.1431	0.41637	1.1285
MACS_peak_2604	chr6	35877182	35877513	intron	11610	SRPK1	9.63702	3.1431	1.24911	1.88084
MACS_peak_256	chr10	42818319	42818657	Intergenic	45005	LOC441666	9.63702	3.1431	0.832739	1.1285
MACS_peak_1415	chr19	44359985	44360401	Intergenic	24095	ZNF404	9.63702	3.1431	0.832739	2.63317
MACS_peak_2266	chr3	128578025	128578401	Intergenic	12171	LOC653712	9.63702	3.1431	2.49822	1.1285
MACS_peak_1439	chr19	44983975	44984287	intron	20443	ZNF180	9.63702	3.1431	1.66548	1.50467
MACS_peak_800	chr15	77330206	77330478	TTS	33228	TSPAN3	9.63702	3.1431	0.832739	1.50467
MACS_peak_2086	chr22	29075038	29075359	intron	655	TTC28	9.63702	3.59212	1.66548	0.752335
MACS_peak_868	chr16	33964778	33965046	Intergenic	-2409	LINC00273	9.63702	3.59212	0.832739	1.1285
MACS_peak_3554	chr9	140371393	140371722	intron	-17771	NELF	9.63702	3.59212	0.832739	0.752335
MACS_peak_3444	chr8	146190858	146191196	Intergenic	-14753	ZNF16	9.63702	3.59212	2.08185	1.1285
MACS_peak_3020	chr7	76839036	76839405	intron	-10070	FGL2	9.63702	3.59212	0.832739	1.88084
MACS_peak_1155	chr18	8412108	8412495	Intergenic	-45269	LOC100192426	9.63702	3.59212	0.41637	1.50467
MACS_peak_1999	chr21	44909183	44909468	Intergenic	-11222	LINC00313	9.63702	3.59212	0.41637	1.1285
MACS_peak_3125	chr8	126528425	126528784	Intergenic	86041	TRIB1	9.63702	3.59212	2.91459	3.00934
MACS_peak_469	chr12	247558	247847	exon	10630	LOC574538	9.63702	3.59212	1.24911	0
MACS_peak_3026	chr7	90063213	90063567	Intergenic	30742	CLDN12	9.63702	3.59212	0.832739	1.50467
MACS_peak_2164	chr22	49065315	49065664	intron	93371	FAM19A5	9.63702	3.59212	0.832739	0.752335
MACS_peak_2711	chr7	596372	596673	intron	36494	FLJ44511	9.63702	3.59212	1.66548	0.376167
MACS_peak_2066	chr22	27647637	27647986	Intergenic	549675	MN1	9.63702	3.59212	2.49822	3.38551
MACS_peak_1146	chr18	2043785	2044143	Intergenic	527525	METTL4	9.63702	3.59212	1.66548	1.88084
MACS_peak_1395	chr19	38652952	38653225	intron	61802	DPF1	9.63702	3.59212	0.41637	1.1285
MACS_peak_1472	chr19	52810379	52810682	intron	10104	ZNF480	9.63702	3.59212	0.832739	0.752335
MACS_peak_1647	chr2	87655594	87655896	Intergenic	-99229	LINC00152	9.63702	3.59212	1.66548	1.88084
MACS_peak_3179	chr8	140209975	140210321	Intergenic	-283912	COL22A1	9.63702	3.59212	2.08185	3.00934
MACS_peak_1552	chr2	24337064	24337372	Intergenic	8933	PFN4	9.63702	3.59212	2.08185	1.1285
MACS_peak_1481	chr19	53060483	53060833	Intergenic	-12868	ZNF701	9.63702	4.04113	0.832739	0.376167
MACS_peak_1128	chr17	80709001	80709335	promoter-TSS	-772	TBCD	9.63702	4.04113	0	1.1285
MACS_peak_1381	chr19	37825480	37825830	promoter-TSS	75	HKR1	9.63702	4.04113	0.832739	0.752335
MACS_peak_3523	chr9	130471465	130471791	intron	2357	C9orf117	9.63702	4.04113	0	0.752335
MACS_peak_3538	chr9	137170023	137170363	Intergenic	-48123	RXRA	9.63702	4.04113	1.24911	0.752335
MACS_peak_273	chr10	43485717	43486085	Intergenic	-7110	MIR5100	9.63702	4.04113	2.08185	0.752335
MACS_peak_2718	chr7	720143	720513	exon	31833	PRKAR1B	9.63702	4.04113	1.66548	1.88084
MACS_peak_2575	chr5	178509643	178509995	Intergenic	22212	ZNF354C	9.63702	4.04113	1.66548	2.257
MACS_peak_2620	chr6	40517384	40517803	intron	37533	LRFN2	9.63702	4.04113	2.08185	0.752335
MACS_peak_2125	chr22	37723290	37723622	Intergenic	44961	CYTH4	9.63702	4.04113	1.24911	1.1285
MACS_peak_395	chr11	3367770	3368122	Intergenic	32506	ZNF195	9.63702	4.04113	0.832739	2.257
MACS_peak_458	chr11	111426217	111426555	intron	15153	LAYN	9.63702	4.04113	2.08185	0.752335
MACS_peak_1361	chr19	37258184	37258580	intron	5334	ZNF850	9.63702	4.04113	0.832739	1.1285
MACS_peak_3525	chr9	131931088	131931395	Intergenic	9299	IER5L	9.63702	4.04113	0.832739	2.257
MACS_peak_949	chr16	86369213	86369641	intron	9858	LOC732275	9.63702	4.04113	2.08185	0.376167
MACS_peak_1551	chr2	24336389	24336722	Intergenic	9596	PFN4	9.63702	4.04113	1.24911	1.1285
MACS_peak_1877	chr20	47825434	47825796	Intergenic	-10217	DDX27	9.63702	4.49015	1.66548	0
MACS_peak_1602	chr2	47434613	47434913	Intergenic	-31023	CALM2	9.63702	4.49015	1.24911	1.88084
MACS_peak_1803	chr2	242526571	242526884	intron	-28169	BOK-AS1	9.63702	4.49015	0.41637	0.752335
MACS_peak_3544	chr9	137552350	137552674	intron	18860	COL5A1	9.63702	4.49015	2.08185	3.00934
MACS_peak_1063	chr17	63804047	63804388	intron	18444	CEP112	9.63702	4.49015	1.66548	1.1285
MACS_peak_968	chr16	89654621	89654912	intron	12590	CPNE7	9.63702	4.49015	0	1.50467
MACS_peak_669	chr14	65240982	65241300	exon	48725	SPTB	9.63702	4.49015	1.24911	2.63317
MACS_peak_2656	chr6	83640848	83641195	intron	134524	UBE3D	9.63702	4.49015	0	1.50467
MACS_peak_127	chr1	112222339	112222715	intron	59519	FAM212B	9.63702	4.49015	2.49822	3.00934
MACS_peak_1680	chr2	95882701	95883002	Intergenic	51668	ZNF2	9.63702	4.49015	1.66548	1.50467
MACS_peak_493	chr12	12801367	12801749	Intergenic	36727	CREBL2	9.63702	4.49015	0.832739	3.38551
MACS_peak_24	chr1	22255072	22255415	intron	8507	HSPG2	9.63702	4.49015	2.08185	0.376167
MACS_peak_3126	chr8	127162045	127162480	Intergenic	-198821	LOC100130231	9.63702	4.49015	2.91459	3.00934
MACS_peak_1046	chr17	59750577	59751006	Intergenic	-82228	NACA2	9.63702	4.49015	1.24911	0.752335
MACS_peak_2104	chr22	35335810	35336186	Intergenic	-126132	ISX	9.63702	4.49015	0.832739	0.752335
MACS_peak_3517	chr9	104170581	104171005	exon	9630	ZNF189	9.63702	4.49015	2.91459	2.257
MACS_peak_768	chr15	57443590	57443938	intron	-67891	TCF12	9.63702	4.49015	1.24911	0.376167
MACS_peak_2766	chr7	2069682	2070009	intron	-185956	MIR4655	9.63702	4.49015	0.41637	1.1285
MACS_peak_540	chr12	120868260	120868585	Intergenic	-7471	COX6A1	9.63702	4.93916	2.91459	1.88084
MACS_peak_754	chr15	25302166	25302477	TTS	315	SNORD116-3	9.63702	4.93916	0.41637	1.1285
MACS_peak_1753	chr2	133037770	133038118	Intergenic	-22402	ANKRD30BL	9.63702	4.93916	0.832739	1.88084
MACS_peak_2699	chr7	304048	304366	Intergenic	-25929	LOC100288524	9.63702	4.93916	1.66548	2.257
MACS_peak_2649	chr6	71954931	71955337	Intergenic	-43343	OGFRL1	9.63702	4.93916	1.24911	1.88084
MACS_peak_334	chr10	77115670	77116037	intron	-45433	ZNF503-AS2	9.63702	4.93916	2.08185	2.257
MACS_peak_1355	chr19	37212670	37213026	TTS	32546	ZNF567	9.63702	4.93916	1.24911	0.376167
MACS_peak_915	chr16	69670457	69670802	intron	70760	NFAT5	9.63702	4.93916	0.832739	0.376167
MACS_peak_82	chr1	44702800	44703187	intron	23868	DMAP1	9.63702	4.93916	1.24911	2.63317
MACS_peak_3088	chr8	104574986	104575387	intron	62210	RIMS2	9.63702	4.93916	1.24911	1.88084
MACS_peak_2549	chr5	151211364	151211652	intron	60032	G3BP1	9.63702	4.93916	1.24911	1.50467
MACS_peak_1922	chr20	57102727	57103157	intron	12507	APCDD1L-AS1	9.63702	4.93916	2.49822	3.00934
MACS_peak_1612	chr2	54347871	54348215	intron	5633	ACYP2	9.63702	4.93916	1.24911	1.50467
MACS_peak_2192	chr3	10430037	10430465	intron	5995	MIR885	9.63702	4.93916	1.66548	1.1285
MACS_peak_1745	chr2	129227421	129227781	Intergenic	-151430	HS6ST1	9.63702	4.93916	0.832739	4.13784
MACS_peak_3139	chr8	132274148	132274541	Intergenic	-221509	ADCY8	9.63702	4.93916	1.66548	1.50467
MACS_peak_3062	chr8	81350487	81350814	Intergenic	-47798	ZBTB10	9.63702	5.38818	1.66548	3.38551
MACS_peak_590	chr13	113763868	113764254	intron	3959	F7	9.63702	5.38818	0.41637	1.50467
MACS_peak_1952	chr20	61780148	61780565	Intergenic	-29496	MIR124-3	9.63702	5.38818	2.49822	2.63317
MACS_peak_510	chr12	32076087	32076384	Intergenic	-36118	KIAA1551	9.63702	5.38818	0.832739	1.50467
MACS_peak_2547	chr5	151210418	151210748	intron	59107	G3BP1	9.63702	5.38818	1.66548	1.88084
MACS_peak_1486	chr19	53313111	53313483	intron	11625	ZNF28	9.63702	5.38818	0.41637	0
MACS_peak_2248	chr3	110635979	110636365	Intergenic	152634	PVRL3-AS1	9.63702	5.38818	1.24911	0
MACS_peak_866	chr16	33240982	33241282	Intergenic	-20988	TP53TG3	9.63702	5.83719	0.41637	0.752335
MACS_peak_2265	chr3	127610344	127610672	Intergenic	-31394	KBTBD12	9.63702	5.83719	0.832739	1.1285
MACS_peak_1890	chr20	50175322	50175695	intron	3862	NFATC2	9.63702	5.83719	0.41637	1.1285
MACS_peak_2977	chr7	62255367	62255780	Intergenic	508861	LOC643955	9.63702	5.83719	2.08185	1.88084
MACS_peak_2887	chr7	6724629	6725006	Intergenic	21749	ZNF12	9.63702	5.83719	0.41637	3.00934
MACS_peak_1774	chr2	203017746	203018038	Intergenic	85430	SUMO1	9.63702	5.83719	0.832739	0.752335
MACS_peak_3172	chr8	139218554	139218938	intron	290319	FAM135B	9.63702	6.28621	1.66548	2.63317
MACS_peak_2947	chr7	48411077	48411480	intron	200221	ABCA13	9.63702	6.28621	1.66548	3.38551
MACS_peak_1986	chr21	32308553	32308857	Intergenic	-54831	KRTAP11-1	9.63702	6.28621	0.41637	1.1285
MACS_peak_1611	chr2	53583699	53584105	Intergenic	-411027	CHAC2	9.63702	6.28621	1.66548	1.1285
MACS_peak_1972	chr21	11131914	11132224	Intergenic	-33132	BAGE	9.63702	6.73522	0.832739	3.00934
MACS_peak_29	chr1	23689528	23689919	intron	5156	ZNF436	9.63702	6.73522	1.24911	1.88084
MACS_peak_3571	chrY	58982738	58983141	Intergenic	-117518	SPRY3	9.63702	6.73522	2.08185	0.752335
MACS_peak_1430	chr19	44474417	44474733	Intergenic	-13747	ZNF155	9.63702	7.63325	0	0.752335
MACS_peak_2032	chr22	24749836	24750194	intron	11939	SPECC1L	9.63702	7.63325	0.832739	3.00934
MACS_peak_1543	chr2	12161324	12161704	Intergenic	-184402	MIR4262	9.63702	7.63325	2.08185	2.257
MACS_peak_281	chr10	44021247	44021583	Intergenic	42492	ZNF239	9.63702	8.98029	2.08185	2.257
MACS_peak_2831	chr7	5102152	5102489	intron	-9371	LOC389458	9.63702	10.7764	2.49822	1.1285
MACS_peak_1232	chr18	77331781	77332054	Intergenic	-107884	CTDP1	9.0347	0.449015	1.24911	1.1285
MACS_peak_988	chr17	21312658	21313011	intron	4386	KCNJ18	9.0347	0.449015	2.91459	1.88084
MACS_peak_2966	chr7	56541988	56542279	Intergenic	-21783	DKFZp434L192	9.0347	0.449015	0.41637	0.376167
MACS_peak_3518	chr9	107399113	107399429	Intergenic	-18786	OR13C9	9.0347	0.449015	0.41637	0.376167
MACS_peak_2949	chr7	50198223	50198649	intron	62754	C7orf72	9.0347	0.449015	0	0.752335
MACS_peak_68	chr1	41911287	41911515	Intergenic	38943	EDN2	9.0347	0.449015	2.08185	1.50467
MACS_peak_940	chr16	84351909	84352250	intron	23678	WFDC1	9.0347	0.449015	1.24911	1.88084
MACS_peak_672	chr14	65674138	65674433	Intergenic	-104872	MAX	9.0347	0.898029	2.49822	1.50467
MACS_peak_1646	chr2	87644335	87644597	Intergenic	-110508	LINC00152	9.0347	0.898029	0.832739	0.752335
MACS_peak_514	chr12	37939504	37939824	Intergenic	-770893	ALG10B	9.0347	0.898029	0.832739	1.1285
MACS_peak_171	chr1	227748562	227748880	Intergenic	-2499	ZNF678	9.0347	0.898029	0.41637	0
MACS_peak_3142	chr8	133912410	133912813	intron	33406	TG	9.0347	0.898029	2.49822	1.50467
MACS_peak_1247	chr18	77678554	77678858	intron	32947	PQLC1	9.0347	0.898029	1.24911	0.752335
MACS_peak_2167	chr22	49589667	49590006	Intergenic	327254	LOC100128946	9.0347	0.898029	1.24911	2.63317
MACS_peak_536	chr12	117620560	117620932	intron	7554	FBXO21	9.0347	1.34704	0.832739	1.1285
MACS_peak_3241	chr8	141081313	141081636	intron	-366175	KCNK9	9.0347	1.34704	2.91459	2.257
MACS_peak_2516	chr5	117543459	117543759	Intergenic	-766672	MIR1244-2	9.0347	1.34704	0.41637	0.752335
MACS_peak_2212	chr3	40175374	40175780	intron	-175596	EIF1B	9.0347	1.34704	1.24911	0.376167
MACS_peak_3278	chr8	143131074	143131384	Intergenic	-126471	MIR4472-1	9.0347	1.34704	1.66548	1.1285
MACS_peak_1510	chr19	58693376	58693699	promoter-TSS	-859	ZNF274	9.0347	1.34704	0.832739	2.257
MACS_peak_1479	chr19	53057175	53057480	exon	-16199	ZNF701	9.0347	1.34704	1.66548	1.1285
MACS_peak_2563	chr5	172236311	172236660	Intergenic	-24738	ERGIC1	9.0347	1.34704	2.91459	0.752335
MACS_peak_2159	chr22	48955119	48955420	intron	-12070	LOC284933	9.0347	1.34704	0.41637	0
MACS_peak_333	chr10	77044805	77045132	Intergenic	-11173	ZNF503-AS1	9.0347	1.34704	1.24911	0.376167
MACS_peak_3256	chr8	142566059	142566361	Intergenic	-48880	FLJ43860	9.0347	1.34704	1.66548	0.752335
MACS_peak_312	chr10	62800060	62800340	Intergenic	-39002	RHOBTB1	9.0347	1.34704	1.24911	1.88084
MACS_peak_3507	chr9	96813063	96813371	intron	20126	PTPDC1	9.0347	1.34704	0.832739	1.50467
MACS_peak_2558	chr5	170006491	170006843	intron	75619	KCNIP1	9.0347	1.34704	1.66548	0.376167
MACS_peak_1573	chr2	32044919	32045268	Intergenic	190605	MEMO1	9.0347	1.34704	1.66548	0
MACS_peak_148	chr1	146830067	146830408	Intergenic	115946	CHD1L	9.0347	1.34704	0.832739	0.752335
MACS_peak_1275	chr19	12635757	12636062	TTS	26447	ZNF564	9.0347	1.34704	0.832739	0.376167
MACS_peak_3314	chr8	143454933	143455285	intron	29434	TSNARE1	9.0347	1.34704	0.832739	2.257
MACS_peak_2710	chr7	591882	592155	intron	31990	FLJ44511	9.0347	1.34704	1.24911	0.752335
MACS_peak_1245	chr18	77662700	77663060	3' UTR	39212	KCNG2	9.0347	1.34704	0.832739	1.1285
MACS_peak_1798	chr2	241464406	241464679	intron	32863	ANKMY1	9.0347	1.34704	0.41637	1.50467
MACS_peak_2175	chr22	49945373	49945722	Intergenic	105643	C22orf34	9.0347	1.34704	0	0.376167
MACS_peak_545	chr12	124810409	124810710	intron	36849	FAM101A	9.0347	1.34704	0	0.752335
MACS_peak_1523	chr19	58755009	58755331	intron	15100	ZNF544	9.0347	1.34704	0	0.376167
MACS_peak_2361	chr4	66879784	66880051	Intergenic	344238	LOC100144602	9.0347	1.34704	1.66548	0.752335
MACS_peak_1899	chr20	54285578	54285883	Intergenic	294798	CBLN4	9.0347	1.34704	0.41637	0.376167
MACS_peak_3442	chr8	146169689	146169992	intron	6434	ZNF16	9.0347	1.79606	0.832739	0.376167
MACS_peak_429	chr11	67062834	67063172	intron	6187	ANKRD13D	9.0347	1.79606	1.24911	0.376167
MACS_peak_3220	chr8	140859037	140859463	intron	-143951	KCNK9	9.0347	1.79606	1.24911	2.257
MACS_peak_3106	chr8	122068560	122068935	Intergenic	-244438	SNTB1	9.0347	1.79606	1.24911	1.88084
MACS_peak_71	chr1	42700382	42700746	intron	-70169	GUCA2A	9.0347	1.79606	0.41637	1.50467
MACS_peak_1932	chr20	58187196	58187559	intron	7774	PHACTR3	9.0347	1.79606	1.24911	0.752335
MACS_peak_1609	chr2	52007478	52007836	Intergenic	-747983	NRXN1	9.0347	1.79606	0.41637	0
MACS_peak_2520	chr5	124589163	124589481	Intergenic	-508517	ZNF608	9.0347	1.79606	1.24911	0
MACS_peak_520	chr12	47851140	47851478	Intergenic	-241083	PCED1B-AS1	9.0347	1.79606	0.41637	0.752335
MACS_peak_2161	chr22	48958363	48958655	intron	-13609	FAM19A5	9.0347	1.79606	1.66548	1.88084
MACS_peak_2196	chr3	13578156	13578563	Intergenic	-12266	FBLN2	9.0347	1.79606	0.41637	1.88084
MACS_peak_2140	chr22	44520713	44520995	intron	-47982	PARVG	9.0347	1.79606	1.66548	1.88084
MACS_peak_32	chr1	25048080	25048433	Intergenic	-23504	CLIC4	9.0347	1.79606	1.66548	0.376167
MACS_peak_865	chr16	33237801	33238122	Intergenic	-24159	TP53TG3	9.0347	1.79606	0.832739	0.752335
MACS_peak_2314	chr4	44751488	44751801	Intergenic	-22993	GNPDA2	9.0347	1.79606	0.832739	1.50467
MACS_peak_1599	chr2	46075443	46075793	intron	196575	PRKCE	9.0347	1.79606	1.66548	3.76167
MACS_peak_1192	chr18	13356824	13357109	intron	70567	LOC100288122	9.0347	1.79606	0.41637	0.752335
MACS_peak_1217	chr18	46317796	46318095	intron	120974	MIR4743	9.0347	1.79606	0.832739	0.376167
MACS_peak_1317	chr19	33195675	33195982	intron	12961	NUDT19	9.0347	1.79606	1.24911	0.376167
MACS_peak_1906	chr20	55459981	55460282	Intergenic	255773	TFAP2C	9.0347	1.79606	0	2.63317
MACS_peak_2252	chr3	119758853	119759157	intron	54259	GSK3B	9.0347	1.79606	0	1.50467
MACS_peak_205	chr10	21987746	21988072	intron	164335	MLLT10	9.0347	1.79606	0.832739	1.50467
MACS_peak_96	chr1	53564974	53565316	intron	37260	PODN	9.0347	1.79606	1.66548	0.752335
MACS_peak_462	chr11	113525491	113525792	Intergenic	51427	TMPRSS5	9.0347	1.79606	1.24911	1.50467
MACS_peak_2801	chr7	4351184	4351471	Intergenic	182010	SDK1	9.0347	1.79606	1.24911	1.50467
MACS_peak_2179	chr22	50421834	50422140	Intergenic	29068	IL17REL	9.0347	1.79606	0.832739	0.376167
MACS_peak_2659	chr6	124998183	124998498	intron	285833	STL	9.0347	1.79606	0.832739	0.752335
MACS_peak_1450	chr19	46893386	46893643	intron	23405	CCDC8	9.0347	1.79606	1.24911	1.88084
MACS_peak_2679	chr6	168072985	168073234	Intergenic	124430	C6orf123	9.0347	1.79606	0	1.50467
MACS_peak_723	chr14	73360844	73361132	promoter-TSS	-179	DPF3	9.0347	1.79606	1.24911	3.00934
MACS_peak_1345	chr19	37014989	37015269	intron	4119	ZNF260	9.0347	1.79606	1.24911	1.50467
MACS_peak_174	chr1	229567492	229567886	intron	2154	ACTA1	9.0347	1.79606	1.24911	0.752335
MACS_peak_1291	chr19	29489358	29489654	Intergenic	-3956	LOC100505835	9.0347	1.79606	0.832739	0.752335
MACS_peak_2105	chr22	35377515	35377873	Intergenic	-84436	ISX	9.0347	2.24507	1.24911	2.257
MACS_peak_2473	chr5	41205436	41205741	intron	8079	C6	9.0347	2.24507	0.832739	1.1285
MACS_peak_1976	chr21	15446360	15446735	Intergenic	-93782	ANKRD20A11P	9.0347	2.24507	1.66548	1.50467
MACS_peak_3242	chr8	141088808	141089085	intron	-373647	KCNK9	9.0347	2.24507	1.66548	0.376167
MACS_peak_3271	chr8	142988368	142988724	Intergenic	-269154	MIR4472-1	9.0347	2.24507	0.41637	1.1285
MACS_peak_1633	chr2	72649200	72649544	intron	-274409	CYP26B1	9.0347	2.24507	0.832739	1.88084
MACS_peak_3197	chr8	140752055	140752467	intron	-36962	KCNK9	9.0347	2.24507	2.08185	3.76167
MACS_peak_192	chr1	247264356	247264684	exon	3154	ZNF669	9.0347	2.24507	0	1.50467
MACS_peak_2515	chr5	112848526	112848844	promoter-TSS	-706	YTHDC2	9.0347	2.24507	0.832739	1.88084
MACS_peak_1504	chr19	58571514	58571916	intron	1108	ZNF135	9.0347	2.24507	0.41637	2.257
MACS_peak_757	chr15	25462325	25462672	intron	-1266	SNORD115-26	9.0347	2.24507	0	1.1285
MACS_peak_482	chr12	6457061	6457414	exon	-5954	TNFRSF1A	9.0347	2.24507	1.66548	2.257
MACS_peak_1386	chr19	38040868	38041245	intron	1205	LOC100507433	9.0347	2.24507	0.832739	1.1285
MACS_peak_495	chr12	13554090	13554405	Intergenic	-24568	C12orf36	9.0347	2.24507	0.832739	1.1285
MACS_peak_2496	chr5	65401991	65402270	Intergenic	-37916	SREK1	9.0347	2.24507	0.41637	1.50467
MACS_peak_3469	chr9	35138602	35138980	Intergenic	-22898	FAM214B	9.0347	2.24507	0.832739	1.50467
MACS_peak_3510	chr9	99571805	99572154	Intergenic	-31651	ZNF510	9.0347	2.24507	2.08185	1.88084
MACS_peak_209	chr10	24465638	24465968	intron	-31917	KIAA1217	9.0347	2.24507	0.832739	0.752335
MACS_peak_2904	chr7	27284559	27284903	exon	2567	EVX1	9.0347	2.24507	0.832739	1.1285
MACS_peak_3474	chr9	35862240	35862535	non-coding	2116	FP588	9.0347	2.24507	2.49822	0.752335
MACS_peak_2900	chr7	7990858	7991170	Intergenic	-17360	GLCCI1	9.0347	2.24507	1.24911	3.38551
MACS_peak_2743	chr7	1769423	1769761	intron	20794	ELFN1	9.0347	2.24507	1.66548	1.50467
MACS_peak_1661	chr2	90475453	90475806	Intergenic	1363745	MIR4436A	9.0347	2.24507	0.41637	2.257
MACS_peak_2395	chr5	650200	650497	intron	37943	CEP72	9.0347	2.24507	0.832739	1.1285
MACS_peak_2178	chr22	50263440	50263748	intron	16097	ZBED4	9.0347	2.24507	2.08185	3.00934
MACS_peak_189	chr1	247156175	247156486	intron	15065	ZNF695	9.0347	2.24507	1.24911	1.1285
MACS_peak_2299	chr4	38326867	38327253	Intergenic	205485	TBC1D1	9.0347	2.24507	2.08185	2.257
MACS_peak_2276	chr3	195512270	195512610	exon	26404	MUC4	9.0347	2.24507	0.832739	1.88084
MACS_peak_2318	chr4	49061982	49062293	intron	73872	CWH43	9.0347	2.24507	0	0
MACS_peak_1591	chr2	43289047	43289461	Intergenic	164491	ZFP36L2	9.0347	2.24507	1.24911	2.63317
MACS_peak_713	chr14	72752508	72752813	intron	352874	RGS6	9.0347	2.24507	0.41637	1.88084
MACS_peak_2618	chr6	40195685	40195989	Intergenic	127908	FLJ41649	9.0347	2.24507	2.08185	3.00934
MACS_peak_3354	chr8	144746663	144746954	Intergenic	14854	ZNF623	9.0347	2.24507	0.832739	1.88084
MACS_peak_679	chr14	67083941	67084293	intron	109992	GPHN	9.0347	2.24507	2.49822	0.752335
MACS_peak_2712	chr7	596924	597364	intron	37116	FLJ44511	9.0347	2.24507	2.08185	3.38551
MACS_peak_2646	chr6	67590661	67590970	Intergenic	1093043	SLC25A51P1	9.0347	2.24507	2.49822	0.752335
MACS_peak_3103	chr8	120574502	120574823	intron	30586	ENPP2	9.0347	2.24507	0.41637	0.752335
MACS_peak_486	chr12	9505760	9506084	Intergenic	69669	LOC642846	9.0347	2.24507	1.66548	1.88084
MACS_peak_3029	chr7	96768089	96768432	intron	22355	ACN9	9.0347	2.24507	0.41637	1.1285
MACS_peak_1639	chr2	81423073	81423375	Intergenic	-891737	LRRTM1	9.0347	2.69409	1.66548	1.88084
MACS_peak_2200	chr3	16123164	16123511	Intergenic	-92847	GALNTL2	9.0347	2.69409	1.24911	1.88084
MACS_peak_3108	chr8	122454786	122455167	Intergenic	-196610	HAS2-AS1	9.0347	2.69409	2.08185	3.38551
MACS_peak_1728	chr2	120371027	120371365	intron	-65547	TMEM177	9.0347	2.69409	0.832739	1.1285
MACS_peak_2533	chr5	140774280	140774542	exon	2928	PCDHGA8	9.0347	2.69409	0	0.376167
MACS_peak_2693	chr7	297513	297822	intron	-32469	LOC100288524	9.0347	2.69409	1.24911	0.752335
MACS_peak_741	chr15	20487974	20488320	non-coding	150	CHEK2P2	9.0347	2.69409	2.08185	3.38551
MACS_peak_1920	chr20	57077798	57078132	intron	11984	APCDD1L	9.0347	2.69409	1.66548	4.89018
MACS_peak_2592	chr6	28278919	28279284	Intergenic	24810	ZNF323	9.0347	2.69409	1.24911	0.376167
MACS_peak_2151	chr22	47858937	47859345	Intergenic	168177	FLJ46257	9.0347	2.69409	1.66548	2.63317
MACS_peak_1689	chr2	97104753	97105140	Intergenic	68900	NEURL3	9.0347	2.69409	1.24911	0.752335
MACS_peak_1261	chr19	5534553	5534847	Intergenic	33305	PLAC2	9.0347	2.69409	0.832739	1.1285
MACS_peak_2122	chr22	37569598	37569923	Intergenic	14570	C1QTNF6	9.0347	2.69409	0.832739	0.752335
MACS_peak_2637	chr6	56864480	56864792	intron	44863	BEND6	9.0347	2.69409	1.66548	1.88084
MACS_peak_733	chr14	106765119	106765422	Intergenic	21001	LINC00226	9.0347	2.69409	0	0.376167
MACS_peak_2155	chr22	48728615	48728950	Intergenic	58606	MIR3201	9.0347	2.69409	0.41637	1.1285
MACS_peak_749	chr15	21317773	21318064	Intergenic	172151	LOC348120	9.0347	2.69409	0.41637	0.376167
MACS_peak_2720	chr7	729658	729979	intron	22343	PRKAR1B	9.0347	2.69409	1.24911	0
MACS_peak_1687	chr2	97096025	97096312	Intergenic	77678	NEURL3	9.0347	2.69409	1.66548	0.752335
MACS_peak_1742	chr2	129032157	129032458	intron	43864	HS6ST1	9.0347	2.69409	2.08185	2.63317
MACS_peak_1106	chr17	75700559	75700881	Intergenic	157697	LOC100507351	9.0347	2.69409	1.66548	1.50467
MACS_peak_2672	chr6	158814100	158814401	intron	80558	TULP4	9.0347	2.69409	0.832739	1.1285
MACS_peak_734	chr14	106873358	106873652	Intergenic	-64950	LINC00221	9.0347	3.1431	0.41637	0.376167
MACS_peak_426	chr11	65619400	65619771	intron	6219	CFL1	9.0347	3.1431	1.66548	1.50467
MACS_peak_37	chr1	27471618	27471940	intron	9842	SLC9A1	9.0347	3.1431	1.66548	1.50467
MACS_peak_2256	chr3	123464723	123465089	intron	-125376	MYLK	9.0347	3.1431	1.24911	1.50467
MACS_peak_1425	chr19	44464623	44465024	intron	9426	ZNF221	9.0347	3.1431	2.08185	0.376167
MACS_peak_1863	chr20	46547341	46547665	Intergenic	-132143	SULF2	9.0347	3.1431	1.24911	3.00934
MACS_peak_425	chr11	65618958	65619272	exon	6689	CFL1	9.0347	3.1431	0.41637	1.88084
MACS_peak_2512	chr5	111899280	111899648	Intergenic	-143738	APC	9.0347	3.1431	2.49822	1.50467
MACS_peak_1686	chr2	96499045	96499349	Intergenic	-177102	FAHD2CP	9.0347	3.1431	1.66548	1.1285
MACS_peak_3260	chr8	142647142	142647461	Intergenic	-129971	FLJ43860	9.0347	3.1431	0.41637	1.50467
MACS_peak_2622	chr6	40705956	40706274	Intergenic	-150989	LRFN2	9.0347	3.1431	2.91459	0.752335
MACS_peak_2787	chr7	3276524	3276843	Intergenic	-64397	SDK1	9.0347	3.1431	1.66548	1.50467
MACS_peak_3249	chr8	142042076	142042452	Intergenic	-30852	PTK2	9.0347	3.1431	0.41637	4.51401
MACS_peak_2374	chr4	88254849	88255125	Intergenic	-10931	HSD17B13	9.0347	3.1431	0.832739	0.376167
MACS_peak_1116	chr17	79497245	79497620	intron	2015	FSCN2	9.0347	3.1431	0.41637	2.63317
MACS_peak_389	chr11	1092809	1093080	exon	18069	MUC2	9.0347	3.1431	0.41637	2.63317
MACS_peak_1449	chr19	46893011	46893349	intron	23739	CCDC8	9.0347	3.1431	1.24911	2.257
MACS_peak_2603	chr6	35876547	35876824	intron	12272	SRPK1	9.0347	3.1431	0.832739	1.1285
MACS_peak_2368	chr4	73877679	73877924	Intergenic	57671	COX18	9.0347	3.1431	2.08185	0.376167
MACS_peak_2677	chr6	161645352	161645713	intron	49575	AGPAT4	9.0347	3.1431	1.66548	0.376167
MACS_peak_1676	chr2	95846452	95846756	intron	15421	ZNF2	9.0347	3.1431	0.832739	2.63317
MACS_peak_650	chr14	62057744	62058103	intron	20665	FLJ22447	9.0347	3.1431	2.49822	2.257
MACS_peak_3298	chr8	143398394	143398726	intron	85983	TSNARE1	9.0347	3.1431	0.832739	0.376167
MACS_peak_2458	chr5	35920955	35921342	exon	17589	CAPSL	9.0347	3.1431	1.24911	2.257
MACS_peak_2548	chr5	151210912	151211245	intron	59602	G3BP1	9.0347	3.1431	0.41637	1.1285
MACS_peak_3085	chr8	99986430	99986748	Intergenic	29958	OSR2	9.0347	3.1431	1.24911	1.50467
MACS_peak_782	chr15	67046633	67046998	intron	45885	SMAD6	9.0347	3.1431	1.24911	0.376167
MACS_peak_2930	chr7	40929951	40930295	Intergenic	755548	C7orf10	9.0347	3.1431	2.08185	4.13784
MACS_peak_1159	chr18	9231428	9231749	intron	94027	ANKRD12	9.0347	3.1431	2.49822	2.63317
MACS_peak_2628	chr6	49242808	49243122	Intergenic	188076	MUT	9.0347	3.1431	0.41637	1.1285
MACS_peak_1358	chr19	37239010	37239351	exon	24536	ZNF850	9.0347	3.1431	2.08185	2.257
MACS_peak_415	chr11	48576477	48576786	Intergenic	66286	OR4A47	9.0347	3.1431	0.41637	0.752335
MACS_peak_2342	chr4	49516437	49516684	Intergenic	528295	CWH43	9.0347	3.1431	2.08185	1.50467
MACS_peak_2211	chr3	38474509	38474904	Intergenic	-21084	ACVR2B	9.0347	3.59212	0.832739	1.1285
MACS_peak_3551	chr9	139667873	139668181	Intergenic	-9062	LCN15	9.0347	3.59212	1.24911	0.376167
MACS_peak_790	chr15	69222333	69222666	promoter-TSS	-340	SPESP1	9.0347	3.59212	1.66548	1.1285
MACS_peak_1943	chr20	60688584	60688885	Intergenic	-8783	LSM14B	9.0347	3.59212	0.832739	0.752335
MACS_peak_1463	chr19	52534928	52535248	Intergenic	-3408	ZNF614	9.0347	3.59212	2.08185	1.88084
MACS_peak_2450	chr5	31776644	31776944	Intergenic	-22237	PDZD2	9.0347	3.59212	1.24911	1.1285
MACS_peak_1942	chr20	60684450	60684789	Intergenic	-12898	LSM14B	9.0347	3.59212	2.08185	2.63317
MACS_peak_1214	chr18	19750026	19750327	intron	772	GATA6	9.0347	3.59212	0.832739	0.752335
MACS_peak_1895	chr20	50837410	50837720	Intergenic	-29041	ZFP64	9.0347	3.59212	1.66548	1.88084
MACS_peak_1851	chr20	45301156	45301533	intron	11780	SLC13A3	9.0347	3.59212	1.24911	2.257
MACS_peak_2625	chr6	44027764	44028139	Intergenic	59614	C6orf223	9.0347	3.59212	1.24911	2.257
MACS_peak_2583	chr5	179692131	179692484	intron	26764	MAPK9	9.0347	3.59212	2.08185	0.752335
MACS_peak_2345	chr4	53200155	53200553	Intergenic	282761	SPATA18	9.0347	3.59212	1.24911	1.50467
MACS_peak_2554	chr5	154462263	154462636	Intergenic	69189	KIF4B	9.0347	3.59212	1.24911	1.88084
MACS_peak_987	chr17	21212290	21212618	intron	21106	MAP2K3	9.0347	3.59212	2.08185	2.257
MACS_peak_400	chr11	11281770	11282042	Intergenic	92998	CSNK2A1P	9.0347	3.59212	0.832739	1.50467
MACS_peak_147	chr1	146770697	146771059	Intergenic	56587	CHD1L	9.0347	3.59212	0.41637	0.752335
MACS_peak_1162	chr18	9601264	9601662	intron	13142	PPP4R1	9.0347	3.59212	1.66548	1.1285
MACS_peak_2255	chr3	122674819	122675153	intron	19995	SEMA5B	9.0347	3.59212	0.41637	1.50467
MACS_peak_779	chr15	65306034	65306435	intron	15743	MTFMT	9.0347	3.59212	0.832739	2.257
MACS_peak_92	chr1	51376295	51376648	intron	49465	FAF1	9.0347	3.59212	2.08185	1.1285
MACS_peak_1730	chr2	120908677	120909053	intron	72119	TMEM185B	9.0347	3.59212	0.41637	1.50467
MACS_peak_3383	chr8	145811199	145811537	intron	27520	ARHGAP39	9.0347	3.59212	1.24911	2.257
MACS_peak_1015	chr17	41819373	41819682	Intergenic	16629	SOST	9.0347	3.59212	2.49822	0.752335
MACS_peak_1810	chr20	3503062	3503379	intron	51555	ATRN	9.0347	3.59212	0.41637	0.376167
MACS_peak_1303	chr19	30592046	30592373	Intergenic	159063	URI1	9.0347	3.59212	1.24911	0.376167
MACS_peak_480	chr12	3827262	3827587	intron	34942	EFCAB4B	9.0347	3.59212	2.91459	1.50467
MACS_peak_549	chr12	125237845	125238118	Intergenic	110538	SCARB1	9.0347	3.59212	0.41637	1.1285
MACS_peak_1760	chr2	151517174	151517476	Intergenic	-173116	RND3	9.0347	3.59212	0.832739	0.376167
MACS_peak_3047	chr8	29366298	29366632	Intergenic	-158198	DUSP4	9.0347	3.59212	1.24911	1.1285
MACS_peak_1756	chr2	134887729	134888074	Intergenic	3205	MIR3679	9.0347	4.04113	0.832739	0.752335
MACS_peak_2608	chr6	37563864	37564166	Intergenic	-40817	MIR4462	9.0347	4.04113	1.66548	1.50467
MACS_peak_60	chr1	40975972	40976312	intron	1709	DEM1	9.0347	4.04113	1.66548	2.257
MACS_peak_2396	chr5	711079	711447	Intergenic	-17753	TPPP	9.0347	4.04113	1.66548	2.257
MACS_peak_600	chr13	114586993	114587362	Intergenic	20027	LOC100506394	9.0347	4.04113	2.49822	0.376167
MACS_peak_3170	chr8	138482430	138482817	Intergenic	1026442	FAM135B	9.0347	4.04113	1.66548	2.63317
MACS_peak_1703	chr2	103533492	103533805	Intergenic	155158	TMEM182	9.0347	4.04113	0.832739	0.376167
MACS_peak_1352	chr19	37205961	37206281	intron	25819	ZNF567	9.0347	4.04113	0.832739	1.1285
MACS_peak_3123	chr8	126465134	126465461	Intergenic	22734	TRIB1	9.0347	4.04113	1.24911	4.13784
MACS_peak_2967	chr7	57229934	57230289	Intergenic	17752	GUSBP10	9.0347	4.04113	1.66548	1.1285
MACS_peak_453	chr11	98055923	98056239	Intergenic	-835625	CNTN5	9.0347	4.04113	0.41637	1.1285
MACS_peak_3225	chr8	140886429	140886728	intron	-171279	KCNK9	9.0347	4.04113	1.66548	1.50467
MACS_peak_3273	chr8	142991301	142991648	Intergenic	-266226	MIR4472-1	9.0347	4.04113	1.24911	1.88084
MACS_peak_1800	chr2	241752030	241752366	intron	7527	KIF1A	9.0347	4.04113	0	0.752335
MACS_peak_1548	chr2	23352026	23352306	Intergenic	-256132	KLHL29	9.0347	4.04113	0.41637	1.50467
MACS_peak_2707	chr7	428772	429157	Intergenic	9573	LOC442497	9.0347	4.04113	1.24911	1.88084
MACS_peak_77	chr1	43773715	43774039	intron	7311	TIE1	9.0347	4.04113	0	0.376167
MACS_peak_412	chr11	47673913	47674246	Intergenic	-9873	MTCH2	9.0347	4.49015	2.49822	0.752335
MACS_peak_1218	chr18	48549621	48549931	Intergenic	-6807	SMAD4	9.0347	4.49015	0	0
MACS_peak_330	chr10	76576533	76576932	Intergenic	-9439	KAT6B	9.0347	4.49015	1.66548	3.38551
MACS_peak_1410	chr19	44349242	44349565	intron	17930	ZNF283	9.0347	4.49015	2.08185	1.50467
MACS_peak_1677	chr2	95855489	95855837	Intergenic	24480	ZNF2	9.0347	4.49015	2.08185	1.1285
MACS_peak_3336	chr8	144054879	144055178	Intergenic	44779	LOC100133669	9.0347	4.49015	1.66548	1.88084
MACS_peak_1290	chr19	29247712	29248072	Intergenic	-208146	LOC148145	9.0347	4.49015	1.66548	0.752335
MACS_peak_1391	chr19	38286985	38287394	Intergenic	-16959	ZNF573	9.0347	4.93916	0.41637	1.88084
MACS_peak_1467	chr19	52571450	52571804	intron	-19554	ZNF432	9.0347	4.93916	0.832739	1.50467
MACS_peak_1144	chr18	1098372	1098803	Intergenic	193290	ADCYAP1	9.0347	4.93916	0.832739	0.376167
MACS_peak_2418	chr5	7438287	7438571	intron	42086	ADCY2	9.0347	4.93916	0.41637	0.752335
MACS_peak_119	chr1	110469047	110469339	3' UTR	15960	CSF1	9.0347	4.93916	2.08185	1.88084
MACS_peak_674	chr14	65994910	65995189	intron	115601	FUT8	9.0347	4.93916	1.24911	1.50467
MACS_peak_6	chr1	2586973	2587313	intron	-22662	MMEL1	9.0347	5.38818	1.66548	1.88084
MACS_peak_1299	chr19	29995675	29995969	intron	20837	LOC284395	9.0347	5.38818	1.66548	0.752335
MACS_peak_2025	chr22	23790542	23790836	Intergenic	-45890	ZDHHC8P1	9.0347	5.83719	1.24911	1.1285
MACS_peak_1804	chr2	242645557	242645937	intron	4291	ING5	9.0347	5.83719	1.24911	0.752335
MACS_peak_1889	chr20	50071168	50071545	intron	-1842	MIR3194	9.0347	5.83719	1.24911	2.257
MACS_peak_2559	chr5	170288257	170288597	promoter-TSS	-469	RANBP17	9.0347	5.83719	1.66548	1.1285
MACS_peak_930	chr16	75203014	75203325	exon	20748	ZFP1	9.0347	5.83719	2.08185	2.63317
MACS_peak_2535	chr5	143260755	143261180	Intergenic	69241	HMHB1	9.0347	5.83719	2.49822	0.752335
MACS_peak_1831	chr20	36647207	36647504	intron	14478	TTI1	9.0347	5.83719	1.66548	1.50467
MACS_peak_1263	chr19	8917748	8918048	Intergenic	15667	ZNF558	9.0347	5.83719	2.08185	0.376167
MACS_peak_1715	chr2	112867364	112867732	intron	-28414	FBLN7	9.0347	6.28621	2.49822	1.1285
MACS_peak_2426	chr5	9922835	9923208	Intergenic	-19085	LOC285692	9.0347	6.28621	2.08185	2.63317
MACS_peak_324	chr10	73706046	73706459	Intergenic	-17868	CHST3	9.0347	6.28621	0.832739	2.257
MACS_peak_1682	chr2	96484514	96484806	Intergenic	-191639	FAHD2CP	9.0347	6.28621	1.24911	2.63317
MACS_peak_1346	chr19	37039360	37039656	intron	-20260	ZNF260	9.0347	6.73522	2.49822	0
MACS_peak_542	chr12	124809053	124809405	3' UTR	35519	FAM101A	9.0347	7.18424	1.24911	0.376167
MACS_peak_560	chr12	133620768	133621109	intron	6958	ZNF84	9.0347	7.18424	1.24911	1.50467
MACS_peak_1328	chr19	36726952	36727284	5' UTR	-21132	ZNF565	9.0347	7.63325	1.24911	0.376167
MACS_peak_1438	chr19	44982598	44982995	intron	21778	ZNF180	9.0347	8.08227	1.24911	2.257
MACS_peak_574	chr12	133778697	133779066	exon	20821	ZNF268	9.0347	8.53128	0.832739	1.1285
MACS_peak_2405	chr5	1466013	1466324	intron	-20625	SLC6A3	8.43239	0	0.832739	0.376167
MACS_peak_2355	chr4	57687526	57687842	intron	209	SPINK2	8.43239	0	2.08185	0.752335
MACS_peak_780	chr15	65546048	65546345	Intergenic	32822	PARP16	8.43239	0	0.41637	1.50467
MACS_peak_1075	chr17	69804134	69804443	Intergenic	-312873	SOX9	8.43239	0.449015	2.08185	2.63317
MACS_peak_2509	chr5	104034263	104034589	Intergenic	-400749	RAB9BP1	8.43239	0.449015	1.24911	1.88084
MACS_peak_3395	chr8	145845268	145845602	Intergenic	-6547	ARHGAP39	8.43239	0.449015	1.66548	0.752335
MACS_peak_2985	chr7	62573777	62574151	Intergenic	190470	LOC643955	8.43239	0.449015	0.832739	0.752335
MACS_peak_2657	chr6	90933091	90933365	intron	73334	BACH2	8.43239	0.449015	2.08185	0.752335
MACS_peak_2504	chr5	74426825	74427125	intron	-100251	GCNT4	8.43239	0.898029	0.41637	0.376167
MACS_peak_3501	chr9	88705600	88705882	intron	8769	GOLM1	8.43239	0.898029	1.24911	0
MACS_peak_2311	chr4	42267763	42268066	Intergenic	-113019	BEND4	8.43239	0.898029	1.66548	1.1285
MACS_peak_2216	chr3	44283341	44283649	5' UTR	117	TOPAZ1	8.43239	0.898029	0	0
MACS_peak_1489	chr19	55344384	55344675	intron	355	KIR2DS4	8.43239	0.898029	1.66548	0.752335
MACS_peak_3087	chr8	104272089	104272422	Intergenic	-38406	FZD6	8.43239	0.898029	0.41637	0
MACS_peak_648	chr14	61777553	61777869	Intergenic	-10804	PRKCH	8.43239	0.898029	1.24911	3.38551
MACS_peak_2472	chr5	40885805	40886198	Intergenic	-23598	C7	8.43239	0.898029	2.08185	0.376167
MACS_peak_35	chr1	26270434	26270753	Intergenic	-37225	STMN1	8.43239	0.898029	0.832739	2.257
MACS_peak_2919	chr7	35494591	35494905	Intergenic	141282	LOC401324	8.43239	0.898029	1.24911	0
MACS_peak_939	chr16	84189559	84189871	intron	10850	DNAAF1	8.43239	0.898029	0.41637	1.88084
MACS_peak_935	chr16	81585428	81585741	intron	56630	CMIP	8.43239	0.898029	0.832739	0.752335
MACS_peak_2920	chr7	35495118	35495396	Intergenic	141791	LOC401324	8.43239	0.898029	2.08185	0.376167
MACS_peak_460	chr11	113270581	113270892	exon	12223	ANKK1	8.43239	0.898029	0.832739	0.752335
MACS_peak_1558	chr2	25120003	25120341	intron	21883	ADCY3	8.43239	0.898029	0.41637	0.752335
MACS_peak_3267	chr8	142951869	142952212	Intergenic	-305660	MIR4472-1	8.43239	1.34704	0.832739	2.257
MACS_peak_3148	chr8	134745255	134745616	Intergenic	-161252	ST3GAL1	8.43239	1.34704	0	1.88084
MACS_peak_200	chr10	11728495	11728840	Intergenic	-55689	ECHDC3	8.43239	1.34704	0.41637	2.63317
MACS_peak_2668	chr6	144106728	144107145	intron	-57572	LTV1	8.43239	1.34704	0.832739	1.88084
MACS_peak_3280	chr8	143144787	143145110	Intergenic	-112752	MIR4472-1	8.43239	1.34704	1.24911	1.50467
MACS_peak_2996	chr7	64014686	64015015	intron	8655	ZNF680	8.43239	1.34704	0	0.376167
MACS_peak_731	chr14	82134903	82135218	Intergenic	-134855	SEL1L	8.43239	1.34704	0.41637	0.752335
MACS_peak_966	chr16	89643330	89643651	intron	1314	CPNE7	8.43239	1.34704	0.41637	1.50467
MACS_peak_985	chr17	19556815	19557119	intron	4903	ALDH3A2	8.43239	1.34704	1.24911	0.376167
MACS_peak_1462	chr19	52492821	52493176	Intergenic	-2919	ZNF350	8.43239	1.34704	0.832739	1.88084
MACS_peak_454	chr11	100998839	100999143	promoter-TSS	803	PGR	8.43239	1.34704	1.24911	0
MACS_peak_1603	chr2	47996354	47996624	Intergenic	-13732	MSH6	8.43239	1.34704	1.66548	3.00934
MACS_peak_2231	chr3	56968416	56968734	intron	-5493	ARHGEF3-AS1	8.43239	1.34704	0.41637	0.376167
MACS_peak_559	chr12	133591646	133591937	Intergenic	-22087	ZNF84	8.43239	1.34704	0	1.50467
MACS_peak_2965	chr7	56539404	56539700	Intergenic	-23484	LOC650226	8.43239	1.34704	1.24911	0.752335
MACS_peak_1160	chr18	9297080	9297379	Intergenic	-37536	TWSG1	8.43239	1.34704	1.66548	0.376167
MACS_peak_3157	chr8	135687488	135687807	intron	21154	ZFAT	8.43239	1.34704	2.08185	0.376167
MACS_peak_337	chr10	79062108	79062435	intron	335306	KCNMA1	8.43239	1.34704	0.41637	1.50467
MACS_peak_2416	chr5	3823201	3823552	Intergenic	227208	IRX1	8.43239	1.34704	1.24911	1.88084
MACS_peak_615	chr14	51521307	51521627	intron	40955	TRIM9	8.43239	1.34704	2.49822	1.1285
MACS_peak_593	chr13	113843690	113843982	intron	19126	PCID2	8.43239	1.34704	1.24911	1.88084
MACS_peak_1697	chr2	101746604	101746947	intron	21071	TBC1D8	8.43239	1.34704	0.41637	1.50467
MACS_peak_3006	chr7	67547942	67548267	Intergenic	780479	STAG3L4	8.43239	1.34704	0.832739	0.376167
MACS_peak_406	chr11	14371839	14372201	intron	8011	RRAS2	8.43239	1.79606	0.832739	1.88084
MACS_peak_516	chr12	46442661	46443002	Intergenic	-58430	SCAF11	8.43239	1.79606	0.41637	1.1285
MACS_peak_2519	chr5	124424359	124424613	Intergenic	-343681	ZNF608	8.43239	1.79606	0.41637	1.50467
MACS_peak_3239	chr8	141051661	141051998	intron	-336530	KCNK9	8.43239	1.79606	2.08185	1.88084
MACS_peak_618	chr14	51887520	51887782	Intergenic	-68188	FRMD6	8.43239	1.79606	1.24911	0.752335
MACS_peak_1349	chr19	37062213	37062495	intron	1843	ZNF529	8.43239	1.79606	0.41637	0.752335
MACS_peak_1843	chr20	44349628	44349916	Intergenic	-1216	SPINT4	8.43239	1.79606	0.832739	2.257
MACS_peak_2820	chr7	4832022	4832349	3' UTR	-3915	MIR4656	8.43239	1.79606	2.08185	1.50467
MACS_peak_3015	chr7	72802698	72802960	Intergenic	-45280	FZD9	8.43239	1.79606	0.832739	0.752335
MACS_peak_81	chr1	44584388	44584757	promoter-TSS	50	KLF17	8.43239	1.79606	1.66548	1.1285
MACS_peak_1326	chr19	36719752	36720058	intron	-13919	ZNF565	8.43239	1.79606	1.24911	0.376167
MACS_peak_1365	chr19	37287772	37288125	promoter-TSS	-504	ZNF790-AS1	8.43239	1.79606	1.66548	1.88084
MACS_peak_1960	chr20	62356468	62356812	intron	-11338	LIME1	8.43239	1.79606	2.08185	1.1285
MACS_peak_2223	chr3	45187273	45187572	intron	492	CDCP1	8.43239	1.79606	0	1.1285
MACS_peak_1490	chr19	55593338	55593626	exon	1722	EPS8L1	8.43239	1.79606	0.832739	0.752335
MACS_peak_2917	chr7	35293664	35293951	promoter-TSS	-96	TBX20	8.43239	1.79606	0.41637	0
MACS_peak_2160	chr22	48957534	48957875	intron	-14414	FAM19A5	8.43239	1.79606	1.24911	1.50467
[truncated: 1,086 more rows]

## Sheet: Normalized reads
	Ctl_me3	siORCA_me3	Inp_Ctl	Inp_siORCA	Ctl_me3	siORCA_me3	Inp_Ctl	Inp_siORCA
chr8:146064539-146071067|MACS_peak_3427	534	393	85	99	321.635	176.463	35.3914	37.2406
chr18:107928-108721|MACS_peak_1136	521	515	224	298	313.805	231.243	93.2668	112.098		With Duplicate	Ctl	siORCA	Ctl	siORCA
chr1:142535439-142539790|MACS_peak_140	481	493	228	245	289.713	221.364	94.9323	92.161		H3K9me3	16602651	22270984	1.66027	2.2271
chr7:6730363-6735218|MACS_peak_2892	340	298	87	91	204.787	133.806	36.2242	34.2312		Input	24017125	26583910	2.40171	2.65839
chr7:6689761-6694349|MACS_peak_2872	331	187	35	44	199.366	83.9658	14.5729	16.5514
chr15:20545415-20547916|MACS_peak_743	244	129	50	66	146.964	57.9229	20.8185	24.827
chr8:146060974-146064249|MACS_peak_3426	222	121	53	46	133.714	54.3308	22.0676	17.3037
chr7:5103155-5105815|MACS_peak_2832	188	179	62	55	113.235	80.3736	25.8149	20.6892
chr8:134535527-134538324|MACS_peak_3146	183	119	47	49	110.223	53.4328	19.5694	18.4322
chr19:39171807-39174036|MACS_peak_1397	168	100	26	22	101.189	44.9015	10.8256	8.27568
chr22:35211410-35213566|MACS_peak_2099	152	103	36	53	91.5516	46.2485	14.9893	19.9369
chr22:28092925-28095321|MACS_peak_2076	148	71	37	43	89.1424	31.88	15.4057	16.1752
chr7:2002329-2004370|MACS_peak_2758	145	81	21	40	87.3355	36.3702	8.74376	15.0467
chr7:6725923-6727868|MACS_peak_2889	142	93	30	38	85.5285	41.7584	12.4911	14.2944
chr7:6743247-6745335|MACS_peak_2896	139	77	35	40	83.7216	34.5741	14.5729	15.0467
chr8:145826495-145828179|MACS_peak_3390	126	40	12	24	75.8915	17.9606	4.99643	9.02802
chr22:26161619-26163342|MACS_peak_2047	125	93	42	43	75.2892	41.7584	17.4875	16.1752
chr2:133014238-133016597|MACS_peak_1751	124	52	20	22	74.6869	23.3488	8.32739	8.27568
chr8:145790681-145792525|MACS_peak_3379	121	60	31	29	72.8799	26.9409	12.9075	10.9089
chr8:146071576-146073645|MACS_peak_3428	120	81	36	40	72.2776	36.3702	14.9893	15.0467
chr8:143441480-143443220|MACS_peak_3309	117	40	16	20	70.4707	17.9606	6.66191	7.52335
chr17:55968810-55970406|MACS_peak_1028	114	67	18	42	68.6637	30.084	7.49465	15.799
chr22:26251782-26253386|MACS_peak_2054	112	105	36	35	67.4591	47.1465	14.9893	13.1659
chr14:69382016-69383896|MACS_peak_697	110	61	23	38	66.2545	27.3899	9.5765	14.2944
chr10:95229224-95230850|MACS_peak_355	109	52	19	27	65.6522	23.3488	7.91102	10.1565
chr22:26187876-26189458|MACS_peak_2049	107	70	33	41	64.4475	31.431	13.7402	15.4229
chr8:145814279-145815778|MACS_peak_3385	107	38	21	26	64.4475	17.0626	8.74376	9.78035
chr22:26160173-26161618|MACS_peak_2046	105	71	27	28	63.2429	31.88	11.242	10.5327
chr8:143411569-143413250|MACS_peak_3306	105	39	21	24	63.2429	17.5116	8.74376	9.02802
chr7:73510719-73512284|MACS_peak_3018	104	59	16	12	62.6406	26.4919	6.66191	4.51401
chr17:70413455-70414896|MACS_peak_1077	103	51	28	28	62.0383	22.8998	11.6583	10.5327
chr20:45876928-45878310|MACS_peak_1857	103	52	15	14	62.0383	23.3488	6.24554	5.26634
chr8:145924881-145926495|MACS_peak_3405	102	47	15	15	61.436	21.1037	6.24554	5.64251
chr14:73107917-73109391|MACS_peak_715	101	71	36	26	60.8337	31.88	14.9893	9.78035
chr18:13498518-13499882|MACS_peak_1195	100	45	21	25	60.2313	20.2057	8.74376	9.40418
chr18:12995023-12996272|MACS_peak_1183	99	52	24	23	59.629	23.3488	9.99287	8.65185
chr7:1431951-1433542|MACS_peak_2731	96	44	22	26	57.8221	19.7566	9.16013	9.78035
chr7:2004422-2005898|MACS_peak_2759	94	52	20	28	56.6175	23.3488	8.32739	10.5327
chr8:143406090-143407729|MACS_peak_3302	94	41	19	13	56.6175	18.4096	7.91102	4.89018
chr22:27161813-27163456|MACS_peak_2056	90	50	27	45	54.2082	22.4507	11.242	16.9275
chr7:1433571-1434986|MACS_peak_2732	88	34	19	25	53.0036	15.2665	7.91102	9.40418
chr22:37889131-37890546|MACS_peak_2126	88	46	14	21	53.0036	20.6547	5.82917	7.89952
chr8:131682696-131684225|MACS_peak_3137	87	62	29	48	52.4013	27.8389	12.0747	18.056
chr7:5477305-5478735|MACS_peak_2855	87	36	17	17	52.4013	16.1645	7.07828	6.39485
chr9:37952764-37953861|MACS_peak_3478	85	44	12	16	51.1966	19.7566	4.99643	6.01868
chr21:47579543-47580916|MACS_peak_2003	85	47	4	7	51.1966	21.1037	1.66548	2.63317
chr14:62032032-62033278|MACS_peak_649	84	51	26	35	50.5943	22.8998	10.8256	13.1659
chr5:3312107-3313600|MACS_peak_2413	84	51	22	26	50.5943	22.8998	9.16013	9.78035
chr22:25445636-25446914|MACS_peak_2036	83	47	27	24	49.992	21.1037	11.242	9.02802
chr9:66837107-66838209|MACS_peak_3489	83	48	10	18	49.992	21.5527	4.1637	6.77101
chr4:49151078-49151549|MACS_peak_2328	82	64	30	40	49.3897	28.7369	12.4911	15.0467
chr8:146074796-146076184|MACS_peak_3430	82	31	17	20	49.3897	13.9195	7.07828	7.52335
chr5:54725193-54726400|MACS_peak_2489	82	29	7	5	49.3897	13.0214	2.91459	1.88084
chr8:135476653-135477934|MACS_peak_3154	79	41	19	19	47.5828	18.4096	7.91102	7.14718
chr16:3338857-3340117|MACS_peak_829	79	45	10	12	47.5828	20.2057	4.1637	4.51401
chr22:50714413-50715451|MACS_peak_2181	79	38	8	8	47.5828	17.0626	3.33096	3.00934
chr8:144940251-144940859|MACS_peak_3363	78	38	27	28	46.9804	17.0626	11.242	10.5327
chr14:68568245-68569263|MACS_peak_688	78	36	18	22	46.9804	16.1645	7.49465	8.27568
chr7:2252310-2253698|MACS_peak_2780	78	40	17	25	46.9804	17.9606	7.07828	9.40418
chr5:42951110-42952026|MACS_peak_2476	78	31	6	7	46.9804	13.9195	2.49822	2.63317
chr8:140872316-140873648|MACS_peak_3224	77	38	16	15	46.3781	17.0626	6.66191	5.64251
chr20:61963286-61964591|MACS_peak_1954	76	36	15	15	45.7758	16.1645	6.24554	5.64251
chr10:42364658-42365997|MACS_peak_240	75	65	25	45	45.1735	29.186	10.4092	16.9275
chr2:90484905-90485586|MACS_peak_1667	74	31	17	14	44.5712	13.9195	7.07828	5.26634
chr16:33293804-33294500|MACS_peak_867	74	46	7	17	44.5712	20.6547	2.91459	6.39485
chr11:46398808-46400128|MACS_peak_411	74	36	6	7	44.5712	16.1645	2.49822	2.63317
chr22:28177172-28178389|MACS_peak_2080	73	40	22	28	43.9689	17.9606	9.16013	10.5327
chr14:69127563-69128687|MACS_peak_694	73	38	18	21	43.9689	17.0626	7.49465	7.89952
chr22:30597944-30599216|MACS_peak_2091	73	50	16	15	43.9689	22.4507	6.66191	5.64251
chr8:146215381-146216645|MACS_peak_3454	73	53	15	17	43.9689	23.7978	6.24554	6.39485
chr22:24620121-24621588|MACS_peak_2030	72	35	20	25	43.3666	15.7155	8.32739	9.40418
chr7:1748513-1749663|MACS_peak_2738	72	62	16	25	43.3666	27.8389	6.66191	9.40418
chr8:146058775-146059687|MACS_peak_3425	71	26	20	14	42.7643	11.6744	8.32739	5.26634
chr14:50503583-50504844|MACS_peak_614	71	41	13	25	42.7643	18.4096	5.4128	9.40418
chr8:124888728-124889882|MACS_peak_3119	69	43	26	23	41.5596	19.3076	10.8256	8.65185
chr18:12776352-12777487|MACS_peak_1177	69	29	17	19	41.5596	13.0214	7.07828	7.14718
chr22:27827191-27828287|MACS_peak_2070	68	45	20	28	40.9573	20.2057	8.32739	10.5327
chr2:90481893-90482528|MACS_peak_1666	68	37	17	19	40.9573	16.6135	7.07828	7.14718
chr15:90176399-90177360|MACS_peak_805	68	28	9	9	40.9573	12.5724	3.74733	3.38551
chr22:35738994-35740435|MACS_peak_2110	67	52	23	22	40.355	23.3488	9.5765	8.27568
chr20:47598865-47599776|MACS_peak_1875	67	32	13	4	40.355	14.3685	5.4128	1.50467
chr9:38169573-38170674|MACS_peak_3479	67	33	12	18	40.355	14.8175	4.99643	6.77101
chr2:71690021-71691147|MACS_peak_1631	66	40	10	10	39.7527	17.9606	4.1637	3.76167
chr16:2811678-2812718|MACS_peak_820	65	21	16	16	39.1504	9.42931	6.66191	6.01868
chr7:5100919-5101835|MACS_peak_2830	65	47	15	22	39.1504	21.1037	6.24554	8.27568
chr20:60891648-60892871|MACS_peak_1945	65	56	11	13	39.1504	25.1448	4.58007	4.89018
chr8:144327659-144328792|MACS_peak_3344	64	32	22	20	38.5481	14.3685	9.16013	7.52335
chr8:146214050-146215168|MACS_peak_3453	64	29	18	18	38.5481	13.0214	7.49465	6.77101
chr14:62058505-62059646|MACS_peak_651	64	44	18	20	38.5481	19.7566	7.49465	7.52335
chr22:35285511-35286657|MACS_peak_2103	64	46	18	27	38.5481	20.6547	7.49465	10.1565
chr10:43034554-43035669|MACS_peak_268	64	45	17	19	38.5481	20.2057	7.07828	7.14718
chr8:144732013-144733065|MACS_peak_3353	64	41	15	11	38.5481	18.4096	6.24554	4.13784
chr16:1785504-1786823|MACS_peak_818	64	34	14	3	38.5481	15.2665	5.82917	1.1285
chr6:37621609-37622585|MACS_peak_2611	64	20	12	11	38.5481	8.98029	4.99643	4.13784
chr7:5472316-5473386|MACS_peak_2851	63	49	17	21	37.9457	22.0017	7.07828	7.89952
chr17:38675019-38676148|MACS_peak_1011	63	26	16	15	37.9457	11.6744	6.66191	5.64251
chr7:30494102-30495198|MACS_peak_2908	63	41	14	14	37.9457	18.4096	5.82917	5.26634
chr8:123972081-123973029|MACS_peak_3114	63	35	10	18	37.9457	15.7155	4.1637	6.77101
chr22:27532407-27533250|MACS_peak_2061	62	43	24	21	37.3434	19.3076	9.99287	7.89952
chr20:56920541-56921530|MACS_peak_1914	62	50	16	12	37.3434	22.4507	6.66191	4.51401
chr17:80698898-80700005|MACS_peak_1126	62	27	13	7	37.3434	12.1234	5.4128	2.63317
chr1:40927098-40928154|MACS_peak_54	62	23	11	16	37.3434	10.3273	4.58007	6.01868
chr20:45199961-45201177|MACS_peak_1849	62	34	10	18	37.3434	15.2665	4.1637	6.77101
chr22:26217877-26218923|MACS_peak_2051	61	49	17	19	36.7411	22.0017	7.07828	7.14718
chr14:62059757-62060818|MACS_peak_652	61	49	15	19	36.7411	22.0017	6.24554	7.14718
chr8:143408556-143409526|MACS_peak_3303	61	20	12	11	36.7411	8.98029	4.99643	4.13784
chr7:2099361-2100484|MACS_peak_2774	60	37	14	20	36.1388	16.6135	5.82917	7.52335
chr8:143381263-143382135|MACS_peak_3289	60	39	10	8	36.1388	17.5116	4.1637	3.00934
chr8:23190898-23191914|MACS_peak_3044	60	21	6	10	36.1388	9.42931	2.49822	3.76167
chr12:14411736-14412798|MACS_peak_497	59	43	21	19	35.5365	19.3076	8.74376	7.14718
chr7:5359707-5360530|MACS_peak_2847	59	23	13	11	35.5365	10.3273	5.4128	4.13784
chr7:6703399-6704503|MACS_peak_2876	59	21	12	13	35.5365	9.42931	4.99643	4.89018
chr10:43013806-43014807|MACS_peak_265	58	35	18	13	34.9342	15.7155	7.49465	4.89018
chr8:122231037-122231920|MACS_peak_3107	57	32	14	14	34.3319	14.3685	5.82917	5.26634
chr8:134539662-134540613|MACS_peak_3147	57	39	14	20	34.3319	17.5116	5.82917	7.52335
chr15:91186035-91186786|MACS_peak_809	57	33	6	9	34.3319	14.8175	2.49822	3.38551
chr8:140752568-140753714|MACS_peak_3198	56	28	14	14	33.7296	12.5724	5.82917	5.26634
chr22:19776177-19777240|MACS_peak_2010	56	25	12	8	33.7296	11.2254	4.99643	3.00934
chr1:40919168-40920228|MACS_peak_51	56	32	11	16	33.7296	14.3685	4.58007	6.01868
chr7:2007130-2008184|MACS_peak_2760	56	36	9	11	33.7296	16.1645	3.74733	4.13784
chr22:26250929-26251774|MACS_peak_2053	55	28	19	15	33.1272	12.5724	7.91102	5.64251
chr7:1768468-1769309|MACS_peak_2742	55	34	17	8	33.1272	15.2665	7.07828	3.00934
chr18:13457549-13458582|MACS_peak_1194	55	26	12	14	33.1272	11.6744	4.99643	5.26634
chr8:145682061-145682882|MACS_peak_3370	54	29	14	24	32.5249	13.0214	5.82917	9.02802
chr2:20780918-20781769|MACS_peak_1546	54	37	10	14	32.5249	16.6135	4.1637	5.26634
chr2:87623638-87624048|MACS_peak_1643	54	32	6	10	32.5249	14.3685	2.49822	3.76167
chr18:14747427-14748431|MACS_peak_1206	54	20	5	7	32.5249	8.98029	2.08185	2.63317
chr10:42360914-42361693|MACS_peak_237	53	37	21	19	31.9226	16.6135	8.74376	7.14718
chr22:25742725-25743564|MACS_peak_2043	53	28	12	10	31.9226	12.5724	4.99643	3.76167
chr1:40928438-40929413|MACS_peak_55	52	38	19	8	31.3203	17.0626	7.91102	3.00934
chr4:49109293-49110009|MACS_peak_2321	52	50	17	16	31.3203	22.4507	7.07828	6.01868
chr22:27626094-27626815|MACS_peak_2064	52	51	17	34	31.3203	22.8998	7.07828	12.7897
chr22:19834374-19835174|MACS_peak_2012	52	33	16	16	31.3203	14.8175	6.66191	6.01868
chr8:126136662-126137547|MACS_peak_3121	52	36	14	24	31.3203	16.1645	5.82917	9.02802
chr7:6715964-6716878|MACS_peak_2883	52	26	13	14	31.3203	11.6744	5.4128	5.26634
chr20:49263299-49264063|MACS_peak_1883	52	29	13	14	31.3203	13.0214	5.4128	5.26634
chr18:13278706-13279482|MACS_peak_1189	52	28	11	15	31.3203	12.5724	4.58007	5.64251
chr8:145887181-145888123|MACS_peak_3398	52	29	11	17	31.3203	13.0214	4.58007	6.39485
chr17:80691127-80692005|MACS_peak_1123	52	28	9	7	31.3203	12.5724	3.74733	2.63317
chr18:14998515-14999326|MACS_peak_1209	52	8	6	1	31.3203	3.59212	2.49822	0.376167
chr10:43857674-43858580|MACS_peak_275	52	18	5	9	31.3203	8.08227	2.08185	3.38551
chr4:49122749-49123246|MACS_peak_2326	51	48	16	25	30.718	21.5527	6.66191	9.40418
chr10:79710585-79711343|MACS_peak_339	51	29	10	12	30.718	13.0214	4.1637	4.51401
chr19:29930400-29931363|MACS_peak_1297	51	23	9	10	30.718	10.3273	3.74733	3.76167
chr8:140742301-140743241|MACS_peak_3191	51	26	8	11	30.718	11.6744	3.33096	4.13784
chr5:36481543-36482378|MACS_peak_2460	51	29	8	13	30.718	13.0214	3.33096	4.89018
chr13:114001672-114002491|MACS_peak_594	51	28	7	3	30.718	12.5724	2.91459	1.1285
chr2:10152712-10153683|MACS_peak_1535	51	17	6	4	30.718	7.63325	2.49822	1.50467
chr8:144923506-144924213|MACS_peak_3360	51	27	6	14	30.718	12.1234	2.49822	5.26634
chr22:27203025-27203848|MACS_peak_2057	50	39	21	22	30.1157	17.5116	8.74376	8.27568
chr10:42357248-42357995|MACS_peak_235	50	40	21	25	30.1157	17.9606	8.74376	9.40418
chr14:68616306-68617208|MACS_peak_691	50	33	17	20	30.1157	14.8175	7.07828	7.52335
chr4:49122005-49122450|MACS_peak_2325	50	34	16	14	30.1157	15.2665	6.66191	5.26634
chr19:30894952-30895888|MACS_peak_1315	50	27	15	22	30.1157	12.1234	6.24554	8.27568
chr22:35828204-35829242|MACS_peak_2112	50	19	12	8	30.1157	8.53128	4.99643	3.00934
chr12:1609693-1610522|MACS_peak_473	50	13	11	10	30.1157	5.83719	4.58007	3.76167
chr8:146158613-146159575|MACS_peak_3439	50	22	10	10	30.1157	9.87832	4.1637	3.76167
chr16:89974210-89975081|MACS_peak_972	50	17	4	9	30.1157	7.63325	1.66548	3.38551
chr18:12994098-12994991|MACS_peak_1182	49	34	18	21	29.5134	15.2665	7.49465	7.89952
chr7:5134006-5134989|MACS_peak_2837	49	39	17	20	29.5134	17.5116	7.07828	7.52335
chr7:6159926-6160685|MACS_peak_2863	49	28	16	17	29.5134	12.5724	6.66191	6.39485
chr7:5089367-5090194|MACS_peak_2825	49	21	15	15	29.5134	9.42931	6.24554	5.64251
chr6:36165352-36166176|MACS_peak_2605	49	24	15	17	29.5134	10.7764	6.24554	6.39485
chr10:44139448-44140101|MACS_peak_290	49	30	14	3	29.5134	13.4704	5.82917	1.1285
chr9:138806311-138807332|MACS_peak_3547	49	24	8	10	29.5134	10.7764	3.33096	3.76167
chr7:302194-303005|MACS_peak_2698	49	21	5	4	29.5134	9.42931	2.08185	1.50467
chr7:6728587-6729485|MACS_peak_2891	48	39	19	13	28.911	17.5116	7.91102	4.89018
chr7:6738679-6739476|MACS_peak_2893	48	29	16	11	28.911	13.0214	6.66191	4.13784
chr7:5476196-5477081|MACS_peak_2854	48	30	15	19	28.911	13.4704	6.24554	7.14718
chr4:30332489-30333396|MACS_peak_2288	48	26	13	24	28.911	11.6744	5.4128	9.02802
chr22:27617673-27618415|MACS_peak_2062	48	37	13	29	28.911	16.6135	5.4128	10.9089
chr8:146057833-146058507|MACS_peak_3424	48	27	12	9	28.911	12.1234	4.99643	3.38551
chr8:146155416-146156394|MACS_peak_3436	48	43	12	14	28.911	19.3076	4.99643	5.26634
chr8:145839574-145840379|MACS_peak_3393	48	26	11	20	28.911	11.6744	4.58007	7.52335
chr22:25446925-25447467|MACS_peak_2037	48	25	10	12	28.911	11.2254	4.1637	4.51401
chr8:133913131-133913850|MACS_peak_3143	48	37	9	14	28.911	16.6135	3.74733	5.26634
chr8:143931307-143932194|MACS_peak_3332	48	31	8	23	28.911	13.9195	3.33096	8.65185
chr1:40925842-40926659|MACS_peak_53	48	27	7	10	28.911	12.1234	2.91459	3.76167
chr14:73105714-73106578|MACS_peak_714	47	30	22	14	28.3087	13.4704	9.16013	5.26634
chr5:35919994-35920953|MACS_peak_2457	47	37	18	12	28.3087	16.6135	7.49465	4.51401
chr8:145939144-145940026|MACS_peak_3415	47	23	9	15	28.3087	10.3273	3.74733	5.64251
chr18:661530-662267|MACS_peak_1142	47	20	7	10	28.3087	8.98029	2.91459	3.76167
chr17:59528877-59529660|MACS_peak_1042	47	21	7	6	28.3087	9.42931	2.91459	2.257
chr22:43249960-43250783|MACS_peak_2138	47	24	7	9	28.3087	10.7764	2.91459	3.38551
chr19:58514866-58515761|MACS_peak_1503	47	18	6	7	28.3087	8.08227	2.49822	2.63317
chr22:28062246-28062926|MACS_peak_2073	46	21	21	14	27.7064	9.42931	8.74376	5.26634
chr4:49156271-49157062|MACS_peak_2330	46	31	19	22	27.7064	13.9195	7.91102	8.27568
chr1:110329812-110330714|MACS_peak_116	46	17	7	6	27.7064	7.63325	2.91459	2.257
chr17:60083940-60084726|MACS_peak_1049	46	29	7	13	27.7064	13.0214	2.91459	4.89018
chr18:3757126-3757944|MACS_peak_1148	45	22	18	20	27.1041	9.87832	7.49465	7.52335
chr22:25519390-25520261|MACS_peak_2038	45	47	18	25	27.1041	21.1037	7.49465	9.40418
chr19:44373257-44374126|MACS_peak_1419	45	24	16	12	27.1041	10.7764	6.66191	4.51401
chr1:230218239-230219245|MACS_peak_175	45	28	13	10	27.1041	12.5724	5.4128	3.76167
chr5:37774401-37774992|MACS_peak_2465	45	16	11	9	27.1041	7.18424	4.58007	3.38551
chr10:75624468-75625225|MACS_peak_327	45	13	10	9	27.1041	5.83719	4.1637	3.38551
chr20:62063026-62063837|MACS_peak_1958	45	17	10	9	27.1041	7.63325	4.1637	3.38551
chr7:2017344-2018148|MACS_peak_2762	45	20	10	6	27.1041	8.98029	4.1637	2.257
chr10:42836303-42837130|MACS_peak_259	45	22	10	5	27.1041	9.87832	4.1637	1.88084
chr22:49777976-49778733|MACS_peak_2171	45	20	9	14	27.1041	8.98029	3.74733	5.26634
chr17:75133981-75134671|MACS_peak_1100	45	19	6	6	27.1041	8.53128	2.49822	2.257
chr16:72983931-72984747|MACS_peak_924	45	29	4	3	27.1041	13.0214	1.66548	1.1285
chr19:970534-971380|MACS_peak_1254	45	30	4	7	27.1041	13.4704	1.66548	2.63317
chr8:143444360-143445277|MACS_peak_3311	44	18	17	8	26.5018	8.08227	7.07828	3.00934
chr14:73244621-73245368|MACS_peak_720	44	22	16	12	26.5018	9.87832	6.66191	4.51401
chr20:29861768-29862712|MACS_peak_1820	44	17	14	11	26.5018	7.63325	5.82917	4.13784
chr8:140002622-140003409|MACS_peak_3178	44	24	10	11	26.5018	10.7764	4.1637	4.13784
chr19:36943628-36944499|MACS_peak_1337	44	15	6	5	26.5018	6.73522	2.49822	1.88084
chr17:59532573-59533311|MACS_peak_1044	44	17	6	13	26.5018	7.63325	2.49822	4.89018
chr19:58705709-58706428|MACS_peak_1515	44	18	1	3	26.5018	8.08227	0.41637	1.1285
chr9:95852903-95853771|MACS_peak_3505	43	21	15	12	25.8995	9.42931	6.24554	4.51401
chr14:65861638-65862552|MACS_peak_673	43	28	12	15	25.8995	12.5724	4.99643	5.64251
chr2:38303662-38304451|MACS_peak_1584	43	18	10	5	25.8995	8.08227	4.1637	1.88084
chr8:117961766-117962546|MACS_peak_3093	43	11	9	9	25.8995	4.93916	3.74733	3.38551
chr8:146157819-146158437|MACS_peak_3438	43	14	9	12	25.8995	6.28621	3.74733	4.51401
chr14:65006764-65007564|MACS_peak_664	43	19	8	14	25.8995	8.53128	3.33096	5.26634
chr8:146204703-146205536|MACS_peak_3449	42	25	14	10	25.2972	11.2254	5.82917	3.76167
chr2:47997671-47998372|MACS_peak_1605	42	26	14	10	25.2972	11.6744	5.82917	3.76167
chr17:60081139-60081972|MACS_peak_1047	42	35	14	21	25.2972	15.7155	5.82917	7.89952
chr8:146202601-146203396|MACS_peak_3447	42	43	14	17	25.2972	19.3076	5.82917	6.39485
chr22:27887794-27888487|MACS_peak_2071	42	18	12	16	25.2972	8.08227	4.99643	6.01868
chr5:178012410-178012906|MACS_peak_2567	42	21	12	11	25.2972	9.42931	4.99643	4.13784
chr14:19109356-19110217|MACS_peak_601	42	28	8	12	25.2972	12.5724	3.33096	4.51401
chr14:71410516-71411294|MACS_peak_706	42	13	7	8	25.2972	5.83719	2.91459	3.00934
chr1:172605380-172606229|MACS_peak_156	42	33	7	16	25.2972	14.8175	2.91459	6.01868
chr8:143857859-143858720|MACS_peak_3327	42	21	6	15	25.2972	9.42931	2.49822	5.64251
chr22:31368672-31369379|MACS_peak_2093	42	28	6	10	25.2972	12.5724	2.49822	3.76167
chr17:75132949-75133572|MACS_peak_1099	42	23	5	11	25.2972	10.3273	2.08185	4.13784
chr10:31058175-31058929|MACS_peak_214	42	20	4	4	25.2972	8.98029	1.66548	1.50467
chr16:3367255-3368122|MACS_peak_841	41	39	17	19	24.6949	17.5116	7.07828	7.14718
chr8:146054119-146054980|MACS_peak_3423	41	18	14	21	24.6949	8.08227	5.82917	7.89952
chr8:143527719-143528547|MACS_peak_3322	41	15	13	12	24.6949	6.73522	5.4128	4.51401
chr22:35239829-35240471|MACS_peak_2100	41	29	12	23	24.6949	13.0214	4.99643	8.65185
chr20:33583443-33584095|MACS_peak_1828	41	13	8	6	24.6949	5.83719	3.33096	2.257
chr10:44052096-44052737|MACS_peak_285	41	29	7	10	24.6949	13.0214	2.91459	3.76167
chr8:145888747-145889500|MACS_peak_3399	41	19	6	8	24.6949	8.53128	2.49822	3.00934
chr5:18551626-18552378|MACS_peak_2442	41	11	5	8	24.6949	4.93916	2.08185	3.00934
chr5:7850891-7851532|MACS_peak_2420	41	19	5	8	24.6949	8.53128	2.08185	3.00934
chr16:90063170-90064054|MACS_peak_975	41	23	5	11	24.6949	10.3273	2.08185	4.13784
chr1:110469500-110470227|MACS_peak_120	41	23	3	11	24.6949	10.3273	1.24911	4.13784
chr19:58722203-58723004|MACS_peak_1519	41	11	2	2	24.6949	4.93916	0.832739	0.752335
chr13:114511420-114512189|MACS_peak_597	41	20	2	8	24.6949	8.98029	0.832739	3.00934
chr7:4539030-4539844|MACS_peak_2812	40	16	15	10	24.0925	7.18424	6.24554	3.76167
chr3:75718304-75718660|MACS_peak_2234	40	29	15	17	24.0925	13.0214	6.24554	6.39485
chr10:44047851-44048614|MACS_peak_284	40	14	14	10	24.0925	6.28621	5.82917	3.76167
chr4:41689703-41690512|MACS_peak_2309	40	28	14	14	24.0925	12.5724	5.82917	5.26634
chr17:58569304-58570021|MACS_peak_1036	40	23	11	13	24.0925	10.3273	4.58007	4.89018
chr7:6721022-6721869|MACS_peak_2885	40	30	11	19	24.0925	13.4704	4.58007	7.14718
chr10:115473768-115474508|MACS_peak_366	40	18	10	6	24.0925	8.08227	4.1637	2.257
chr8:145930689-145931422|MACS_peak_3408	40	16	9	9	24.0925	7.18424	3.74733	3.38551
chr7:1911600-1912365|MACS_peak_2751	40	19	9	6	24.0925	8.53128	3.74733	2.257
chr2:237549295-237549969|MACS_peak_1788	40	21	9	6	24.0925	9.42931	3.74733	2.257
chr17:39296061-39296752|MACS_peak_1012	40	27	8	9	24.0925	12.1234	3.33096	3.38551
chr8:134386872-134387544|MACS_peak_3145	40	17	7	23	24.0925	7.63325	2.91459	8.65185
chr17:59533337-59534183|MACS_peak_1045	40	28	7	9	24.0925	12.5724	2.91459	3.38551
chr8:145622343-145622915|MACS_peak_3368	40	17	5	8	24.0925	7.63325	2.08185	3.00934
chr22:19753822-19754571|MACS_peak_2009	40	8	4	6	24.0925	3.59212	1.66548	2.257
chr4:36376312-36377024|MACS_peak_2296	40	10	4	6	24.0925	4.49015	1.66548	2.257
chr18:76414733-76415616|MACS_peak_1229	40	14	3	5	24.0925	6.28621	1.24911	1.88084
chr14:61610456-61611228|MACS_peak_647	39	35	16	16	23.4902	15.7155	6.66191	6.01868
chr2:100281311-100282008|MACS_peak_1694	39	27	15	6	23.4902	12.1234	6.24554	2.257
chr4:30722502-30723243|MACS_peak_2291	39	17	13	18	23.4902	7.63325	5.4128	6.77101
chr5:37775069-37775748|MACS_peak_2466	39	19	13	10	23.4902	8.53128	5.4128	3.76167
chr14:50492171-50492943|MACS_peak_612	39	15	12	15	23.4902	6.73522	4.99643	5.64251
chr16:90060549-90061338|MACS_peak_974	39	33	12	16	23.4902	14.8175	4.99643	6.01868
chr8:143383704-143384420|MACS_peak_3291	39	16	11	8	23.4902	7.18424	4.58007	3.00934
chr14:59369542-59370280|MACS_peak_637	39	9	10	7	23.4902	4.04113	4.1637	2.63317
chr3:44573864-44574558|MACS_peak_2218	39	16	9	15	23.4902	7.18424	3.74733	5.64251
chr15:68648650-68649442|MACS_peak_787	39	23	7	13	23.4902	10.3273	2.91459	4.89018
chr11:189513-190161|MACS_peak_386	39	23	7	6	23.4902	10.3273	2.91459	2.257
chr17:38634291-38634988|MACS_peak_1010	39	17	6	7	23.4902	7.63325	2.49822	2.63317
chr9:132276232-132276923|MACS_peak_3526	39	14	5	7	23.4902	6.28621	2.08185	2.63317
chr6:170475771-170476364|MACS_peak_2684	39	12	3	10	23.4902	5.38818	1.24911	3.76167
chr5:179684024-179684788|MACS_peak_2581	39	34	2	5	23.4902	15.2665	0.832739	1.88084
chr12:50287653-50288462|MACS_peak_521	39	15	1	14	23.4902	6.73522	0.41637	5.26634
chr20:50673547-50674324|MACS_peak_1891	38	20	16	13	22.8879	8.98029	6.66191	4.89018
chr21:11118945-11119737|MACS_peak_1968	38	46	16	19	22.8879	20.6547	6.66191	7.14718
chr17:57836371-57836934|MACS_peak_1032	38	25	15	10	22.8879	11.2254	6.24554	3.76167
chr22:25302233-25302928|MACS_peak_2034	38	19	14	24	22.8879	8.53128	5.82917	9.02802
chr7:5567385-5568212|MACS_peak_2858	38	12	12	17	22.8879	5.38818	4.99643	6.39485
chr20:45174179-45174997|MACS_peak_1847	38	16	11	14	22.8879	7.18424	4.58007	5.26634
chr17:59476177-59476995|MACS_peak_1040	38	15	10	17	22.8879	6.73522	4.1637	6.39485
chr8:145937986-145938577|MACS_peak_3414	38	18	10	14	22.8879	8.08227	4.1637	5.26634
chr8:81931346-81932096|MACS_peak_3065	38	21	10	11	22.8879	9.42931	4.1637	4.13784
chr8:143414558-143415374|MACS_peak_3308	38	20	9	10	22.8879	8.98029	3.74733	3.76167
chr22:26164066-26164837|MACS_peak_2048	38	14	8	13	22.8879	6.28621	3.33096	4.89018
chr22:50720090-50720805|MACS_peak_2184	38	15	7	8	22.8879	6.73522	2.91459	3.00934
chr16:89934512-89935282|MACS_peak_970	38	16	7	8	22.8879	7.18424	2.91459	3.00934
chr20:47367283-47367937|MACS_peak_1874	38	27	7	5	22.8879	12.1234	2.91459	1.88084
chr7:205120-205899|MACS_peak_2687	38	24	6	7	22.8879	10.7764	2.49822	2.63317
chr16:11301227-11301912|MACS_peak_853	38	24	5	4	22.8879	10.7764	2.08185	1.50467
chr3:120060497-120061112|MACS_peak_2253	38	12	2	3	22.8879	5.38818	0.832739	1.1285
chr10:42361755-42362552|MACS_peak_238	37	23	15	12	22.2856	10.3273	6.24554	4.51401
chr8:145010769-145011412|MACS_peak_3367	37	16	14	12	22.2856	7.18424	5.82917	4.51401
chr12:14412799-14413325|MACS_peak_498	37	17	14	5	22.2856	7.63325	5.82917	1.88084
chr2:89866440-89867242|MACS_peak_1658	37	27	14	20	22.2856	12.1234	5.82917	7.52335
chr10:135500796-135501170|MACS_peak_385	37	20	12	24	22.2856	8.98029	4.99643	9.02802
chr8:127726768-127727573|MACS_peak_3128	37	22	11	12	22.2856	9.87832	4.58007	4.51401
chr22:27213662-27214382|MACS_peak_2058	37	26	11	12	22.2856	11.6744	4.58007	4.51401
chr20:46055287-46055882|MACS_peak_1858	37	11	10	8	22.2856	4.93916	4.1637	3.00934
chr8:135296269-135297087|MACS_peak_3151	37	24	10	18	22.2856	10.7764	4.1637	6.77101
chr8:146156603-146157237|MACS_peak_3437	37	28	10	10	22.2856	12.5724	4.1637	3.76167
chr5:54718651-54719381|MACS_peak_2488	37	29	10	9	22.2856	13.0214	4.1637	3.38551
chr2:239940258-239941026|MACS_peak_1796	37	17	9	3	22.2856	7.63325	3.74733	1.1285
chr8:119853277-119853995|MACS_peak_3100	37	23	9	10	22.2856	10.3273	3.74733	3.76167
chr22:40353886-40354465|MACS_peak_2133	37	26	8	10	22.2856	11.6744	3.33096	3.76167
chr11:74382561-74383279|MACS_peak_438	37	33	7	6	22.2856	14.8175	2.91459	2.257
chr3:107810044-107810643|MACS_peak_2247	37	15	6	9	22.2856	6.73522	2.49822	3.38551
chr20:47826269-47826918|MACS_peak_1879	37	16	6	16	22.2856	7.18424	2.49822	6.01868
chr8:143164587-143165308|MACS_peak_3281	37	26	6	14	22.2856	11.6744	2.49822	5.26634
chr16:70814995-70815703|MACS_peak_916	37	20	5	6	22.2856	8.98029	2.08185	2.257
chr14:65007782-65008525|MACS_peak_665	37	20	5	8	22.2856	8.98029	2.08185	3.00934
chr8:143396617-143397259|MACS_peak_3297	37	17	4	7	22.2856	7.63325	1.66548	2.63317
chr2:61016866-61017579|MACS_peak_1618	37	23	2	11	22.2856	10.3273	0.832739	4.13784
chr14:61580480-61581288|MACS_peak_646	36	15	11	16	21.6833	6.73522	4.58007	6.01868
chr7:5474833-5475529|MACS_peak_2852	36	21	11	10	21.6833	9.42931	4.58007	3.76167
chr20:36869878-36870612|MACS_peak_1832	36	15	10	11	21.6833	6.73522	4.1637	4.13784
chr8:145899616-145900392|MACS_peak_3403	36	12	9	15	21.6833	5.38818	3.74733	5.64251
chr10:42356714-42357215|MACS_peak_234	36	17	9	17	21.6833	7.63325	3.74733	6.39485
chr8:141620286-141621048|MACS_peak_3247	36	21	9	12	21.6833	9.42931	3.74733	4.51401
chr7:6679857-6680590|MACS_peak_2869	36	19	8	12	21.6833	8.53128	3.33096	4.51401
chr3:93763027-93763694|MACS_peak_2239	36	19	7	4	21.6833	8.53128	2.91459	1.50467
chr22:27410130-27410905|MACS_peak_2059	36	22	7	12	21.6833	9.87832	2.91459	4.51401
chr18:654041-654702|MACS_peak_1140	36	15	6	14	21.6833	6.73522	2.49822	5.26634
chr2:42327831-42328529|MACS_peak_1589	36	14	5	4	21.6833	6.28621	2.08185	1.50467
chr15:20550420-20551100|MACS_peak_746	36	19	5	11	21.6833	8.53128	2.08185	4.13784
chr7:5358803-5359488|MACS_peak_2846	36	19	5	8	21.6833	8.53128	2.08185	3.00934
chr15:22460945-22461575|MACS_peak_750	36	23	5	6	21.6833	10.3273	2.08185	2.257
chr1:22255438-22256067|MACS_peak_25	36	23	5	8	21.6833	10.3273	2.08185	3.00934
chr19:2312930-2313503|MACS_peak_1256	36	14	2	1	21.6833	6.28621	0.832739	0.376167
chr20:17639300-17640060|MACS_peak_1814	36	24	2	6	21.6833	10.7764	0.832739	2.257
chr17:55547101-55547641|MACS_peak_1025	36	12	1	7	21.6833	5.38818	0.41637	2.63317
chr8:143398779-143399565|MACS_peak_3299	36	15	1	11	21.6833	6.73522	0.41637	4.13784
chr7:5568674-5569293|MACS_peak_2859	35	12	16	8	21.081	5.38818	6.66191	3.00934
chr22:25119514-25120113|MACS_peak_2033	35	20	16	13	21.081	8.98029	6.66191	4.89018
chr22:25533701-25534411|MACS_peak_2039	35	28	16	26	21.081	12.5724	6.66191	9.78035
chr17:60643903-60644636|MACS_peak_1055	35	13	13	20	21.081	5.83719	5.4128	7.52335
chr1:116210424-116211134|MACS_peak_133	35	14	13	11	21.081	6.28621	5.4128	4.13784
chr2:46958223-46958891|MACS_peak_1601	35	24	13	11	21.081	10.7764	5.4128	4.13784
chr2:11240804-11241447|MACS_peak_1541	35	17	12	8	21.081	7.63325	4.99643	3.00934
chr7:1628479-1629078|MACS_peak_2735	35	27	12	7	21.081	12.1234	4.99643	2.63317
chr13:112337444-112338214|MACS_peak_581	35	12	11	10	21.081	5.38818	4.58007	3.76167
chr18:12948782-12949360|MACS_peak_1181	35	13	11	8	21.081	5.83719	4.58007	3.00934
chr10:44112043-44112750|MACS_peak_289	35	29	11	20	21.081	13.0214	4.58007	7.52335
chr7:5092289-5092844|MACS_peak_2826	35	16	9	10	21.081	7.18424	3.74733	3.76167
chr10:44109305-44109843|MACS_peak_287	35	9	8	12	21.081	4.04113	3.33096	4.51401
chr7:6723943-6724515|MACS_peak_2886	35	13	8	14	21.081	5.83719	3.33096	5.26634
chr18:12911983-12912775|MACS_peak_1180	35	15	8	11	21.081	6.73522	3.33096	4.13784
chr11:12225489-12226074|MACS_peak_402	35	23	8	8	21.081	10.3273	3.33096	3.00934
chr8:136802603-136803411|MACS_peak_3168	35	13	7	10	21.081	5.83719	2.91459	3.76167
chr11:27709253-27709972|MACS_peak_408	35	17	7	9	21.081	7.63325	2.91459	3.38551
chr8:118780822-118781367|MACS_peak_3097	35	19	7	8	21.081	8.53128	2.91459	3.00934
chr10:33509447-33509960|MACS_peak_222	35	20	7	6	21.081	8.98029	2.91459	2.257
chr4:84542417-84543082|MACS_peak_2372	35	21	7	10	21.081	9.42931	2.91459	3.76167
chr8:118279510-118280202|MACS_peak_3094	35	19	6	8	21.081	8.53128	2.49822	3.00934
chr7:5334955-5335553|MACS_peak_2844	35	8	5	4	21.081	3.59212	2.08185	1.50467
chr20:56684999-56685725|MACS_peak_1911	35	14	5	10	21.081	6.28621	2.08185	3.76167
chr7:35704726-35705427|MACS_peak_2921	35	20	5	9	21.081	8.98029	2.08185	3.38551
chr6:57546406-57547028|MACS_peak_2639	35	21	5	7	21.081	9.42931	2.08185	2.63317
chr7:1061405-1061992|MACS_peak_2725	35	14	3	3	21.081	6.28621	1.24911	1.1285
chr19:58695592-58696205|MACS_peak_1512	35	19	3	5	21.081	8.53128	1.24911	1.88084
chrY:13464906-13465299|MACS_peak_3569	34	41	15	14	20.4787	18.4096	6.24554	5.26634
chr8:145874659-145875319|MACS_peak_3397	34	15	14	11	20.4787	6.73522	5.82917	4.13784
chr8:123643413-123644062|MACS_peak_3111	34	14	13	20	20.4787	6.28621	5.4128	7.52335
chr7:5093735-5094403|MACS_peak_2827	34	20	12	11	20.4787	8.98029	4.99643	4.13784
chr6:43921999-43922633|MACS_peak_2624	34	11	11	4	20.4787	4.93916	4.58007	1.50467
chr7:2235194-2235916|MACS_peak_2776	34	25	11	10	20.4787	11.2254	4.58007	3.76167
chr7:1435518-1436244|MACS_peak_2733	34	21	10	8	20.4787	9.42931	4.1637	3.00934
chr7:6689051-6689712|MACS_peak_2871	34	14	9	7	20.4787	6.28621	3.74733	2.63317
chr20:61142993-61143722|MACS_peak_1947	34	15	8	5	20.4787	6.73522	3.33096	1.88084
chr20:62017487-62018161|MACS_peak_1957	34	19	8	2	20.4787	8.53128	3.33096	0.752335
chr5:112826406-112827118|MACS_peak_2514	34	21	8	13	20.4787	9.42931	3.33096	4.89018
chr17:80697944-80698684|MACS_peak_1125	34	36	8	4	20.4787	16.1645	3.33096	1.50467
chr2:237575438-237576199|MACS_peak_1789	34	10	7	11	20.4787	4.49015	2.91459	4.13784
chr14:59154039-59154650|MACS_peak_635	34	12	7	11	20.4787	5.38818	2.91459	4.13784
chr8:145891013-145891719|MACS_peak_3400	34	21	7	10	20.4787	9.42931	2.91459	3.76167
chr4:49215802-49216508|MACS_peak_2333	34	15	6	14	20.4787	6.73522	2.49822	5.26634
chr3:118792134-118792807|MACS_peak_2251	34	16	6	7	20.4787	7.18424	2.49822	2.63317
chr3:190283231-190283791|MACS_peak_2270	34	20	6	14	20.4787	8.98029	2.49822	5.26634
chr7:750582-751303|MACS_peak_2721	34	8	5	2	20.4787	3.59212	2.08185	0.752335
chr7:1912506-1913122|MACS_peak_2752	34	15	4	13	20.4787	6.73522	1.66548	4.89018
chr7:44815266-44815871|MACS_peak_2938	34	16	4	7	20.4787	7.18424	1.66548	2.63317
chr9:137290811-137291535|MACS_peak_3539	34	14	1	5	20.4787	6.28621	0.41637	1.88084
chr20:56921629-56922168|MACS_peak_1915	33	22	13	13	19.8763	9.87832	5.4128	4.89018
chr4:30418728-30419303|MACS_peak_2289	33	24	11	8	19.8763	10.7764	4.58007	3.00934
chr22:28097837-28098486|MACS_peak_2077	33	34	11	15	19.8763	15.2665	4.58007	5.64251
chr11:190238-190863|MACS_peak_387	33	19	10	12	19.8763	8.53128	4.1637	4.51401
chr8:140758509-140759150|MACS_peak_3201	33	10	9	10	19.8763	4.49015	3.74733	3.76167
chr7:4058398-4058940|MACS_peak_2792	33	29	9	7	19.8763	13.0214	3.74733	2.63317
chr10:44110779-44111415|MACS_peak_288	33	32	9	12	19.8763	14.3685	3.74733	4.51401
chr16:85663217-85663900|MACS_peak_947	33	12	8	6	19.8763	5.38818	3.33096	2.257
chr1:44395078-44395719|MACS_peak_79	33	16	8	10	19.8763	7.18424	3.33096	3.76167
chr18:10228756-10229492|MACS_peak_1166	33	18	8	10	19.8763	8.08227	3.33096	3.76167
chr22:35584870-35585433|MACS_peak_2108	33	20	8	9	19.8763	8.98029	3.33096	3.38551
chr7:4410321-4410950|MACS_peak_2804	33	23	8	6	19.8763	10.3273	3.33096	2.257
chr17:75244188-75244722|MACS_peak_1103	33	10	7	5	19.8763	4.49015	2.91459	1.88084
chr5:258238-258792|MACS_peak_2392	33	12	7	4	19.8763	5.38818	2.91459	1.50467
chr19:37784566-37784831|MACS_peak_1378	33	16	7	10	19.8763	7.18424	2.91459	3.76167
chr22:27948798-27949409|MACS_peak_2072	33	16	7	10	19.8763	7.18424	2.91459	3.76167
chr8:135458553-135459255|MACS_peak_3153	33	19	7	6	19.8763	8.53128	2.91459	2.257
chr20:60689644-60690225|MACS_peak_1944	33	6	5	3	19.8763	2.69409	2.08185	1.1285
chr10:79225555-79226157|MACS_peak_338	33	8	5	7	19.8763	3.59212	2.08185	2.63317
chr20:48833746-48834386|MACS_peak_1882	33	11	5	8	19.8763	4.93916	2.08185	3.00934
chr19:58774874-58775463|MACS_peak_1529	33	17	5	2	19.8763	7.63325	2.08185	0.752335
chr18:12911131-12911726|MACS_peak_1179	33	16	4	8	19.8763	7.18424	1.66548	3.00934
chr18:13165415-13165965|MACS_peak_1185	33	18	4	12	19.8763	8.08227	1.66548	4.51401
chr8:140744029-140744545|MACS_peak_3193	33	10	3	9	19.8763	4.49015	1.24911	3.38551
chr8:118439116-118439852|MACS_peak_3096	33	11	3	10	19.8763	4.93916	1.24911	3.76167
chr8:144249963-144250608|MACS_peak_3341	33	15	2	8	19.8763	6.73522	0.832739	3.00934
chr20:62917505-62918069|MACS_peak_1963	33	12	1	3	19.8763	5.38818	0.41637	1.1285
chr22:25872833-25873396|MACS_peak_2045	32	17	12	16	19.274	7.63325	4.99643	6.01868
chr7:1766306-1766982|MACS_peak_2739	32	19	12	7	19.274	8.53128	4.99643	2.63317
chr22:26224615-26225348|MACS_peak_2052	32	20	12	10	19.274	8.98029	4.99643	3.76167
chr8:146200243-146200778|MACS_peak_3446	32	20	12	12	19.274	8.98029	4.99643	4.51401
chr8:145940354-145941001|MACS_peak_3416	32	11	11	10	19.274	4.93916	4.58007	3.76167
chr7:1383791-1384354|MACS_peak_2730	32	18	11	11	19.274	8.08227	4.58007	4.13784
chr2:11078881-11079522|MACS_peak_1539	32	9	10	5	19.274	4.04113	4.1637	1.88084
chr22:21333281-21333867|MACS_peak_2018	32	12	9	10	19.274	5.38818	3.74733	3.76167
chr4:40297106-40297694|MACS_peak_2304	32	16	9	14	19.274	7.18424	3.74733	5.26634
chr22:30233782-30234351|MACS_peak_2089	32	21	9	10	19.274	9.42931	3.74733	3.76167
chr22:48231875-48232468|MACS_peak_2153	32	25	8	10	19.274	11.2254	3.33096	3.76167
chr2:88802429-88803079|MACS_peak_1648	32	5	7	3	19.274	2.24507	2.91459	1.1285
chr14:56003819-56004342|MACS_peak_627	32	11	7	7	19.274	4.93916	2.91459	2.63317
chr18:9600450-9601057|MACS_peak_1161	32	18	7	6	19.274	8.08227	2.91459	2.257
chr2:62660052-62660677|MACS_peak_1620	32	10	6	4	19.274	4.49015	2.49822	1.50467
chr9:137340153-137340847|MACS_peak_3541	32	11	6	5	19.274	4.93916	2.49822	1.88084
chr22:46405738-46406374|MACS_peak_2145	32	12	6	6	19.274	5.38818	2.49822	2.257
chr22:35869958-35870662|MACS_peak_2116	32	10	5	5	19.274	4.49015	2.08185	1.88084
chr17:70821223-70821906|MACS_peak_1081	32	30	5	10	19.274	13.4704	2.08185	3.76167
chr19:56889682-56890228|MACS_peak_1491	32	10	4	6	19.274	4.49015	1.66548	2.257
chr10:44028254-44028799|MACS_peak_283	32	12	4	9	19.274	5.38818	1.66548	3.38551
chr5:108792992-108793645|MACS_peak_2510	32	16	4	11	19.274	7.18424	1.66548	4.13784
chr1:95195121-95195653|MACS_peak_109	32	26	4	6	19.274	11.6744	1.66548	2.257
chr22:38355120-38355714|MACS_peak_2127	32	34	4	4	19.274	15.2665	1.66548	1.50467
chr10:55750426-55750988|MACS_peak_306	32	17	3	3	19.274	7.63325	1.24911	1.1285
chr7:2083193-2083805|MACS_peak_2772	32	11	2	4	19.274	4.93916	0.832739	1.50467
chr17:79759114-79759664|MACS_peak_1117	32	13	2	6	19.274	5.83719	0.832739	2.257
chr18:11613311-11614019|MACS_peak_1171	32	24	1	6	19.274	10.7764	0.41637	2.257
chr19:44988655-44989255|MACS_peak_1441	32	18	0	5	19.274	8.08227	0	1.88084
chr2:89869054-89869516|MACS_peak_1659	31	8	13	8	18.6717	3.59212	5.4128	3.00934
chr8:145772224-145772896|MACS_peak_3372	31	10	12	9	18.6717	4.49015	4.99643	3.38551
chr10:43375169-43375849|MACS_peak_272	31	14	11	14	18.6717	6.28621	4.58007	5.26634
chr2:106592506-106593122|MACS_peak_1707	31	19	11	6	18.6717	8.53128	4.58007	2.257
chr8:146073995-146074569|MACS_peak_3429	31	28	11	9	18.6717	12.5724	4.58007	3.38551
chr16:46415359-46415679|MACS_peak_893	31	31	11	33	18.6717	13.9195	4.58007	12.4135
chr7:46500222-46500779|MACS_peak_2943	31	18	10	6	18.6717	8.08227	4.1637	2.257
chr22:35240572-35241224|MACS_peak_2101	31	25	10	18	18.6717	11.2254	4.1637	6.77101
chr21:30155846-30156510|MACS_peak_1981	31	17	9	5	18.6717	7.63325	3.74733	1.88084
chr22:25740332-25740984|MACS_peak_2041	31	20	9	12	18.6717	8.98029	3.74733	4.51401
chr8:145793093-145793682|MACS_peak_3380	31	22	9	13	18.6717	9.87832	3.74733	4.89018
chr14:61564787-61565476|MACS_peak_645	31	10	8	11	18.6717	4.49015	3.33096	4.13784
chr20:48645972-48646544|MACS_peak_1881	31	13	8	4	18.6717	5.83719	3.33096	1.50467
chr1:44284468-44285119|MACS_peak_78	31	16	8	10	18.6717	7.18424	3.33096	3.76167
chr1:109328168-109328824|MACS_peak_114	31	21	8	9	18.6717	9.42931	3.33096	3.38551
chr8:143884762-143885443|MACS_peak_3329	31	14	7	14	18.6717	6.28621	2.91459	5.26634
chr3:197225497-197226132|MACS_peak_2281	31	18	7	4	18.6717	8.08227	2.91459	1.50467
chr14:49702656-49703392|MACS_peak_610	31	23	7	8	18.6717	10.3273	2.91459	3.00934
chr2:122440174-122440636|MACS_peak_1735	31	9	6	2	18.6717	4.04113	2.49822	0.752335
chr19:39226676-39227312|MACS_peak_1399	31	10	6	13	18.6717	4.49015	2.49822	4.89018
chr20:54668777-54669391|MACS_peak_1900	31	14	6	7	18.6717	6.28621	2.49822	2.63317
chr5:42952987-42953614|MACS_peak_2479	31	21	6	11	18.6717	9.42931	2.49822	4.13784
chr8:143884050-143884659|MACS_peak_3328	31	14	5	7	18.6717	6.28621	2.08185	2.63317
chr8:141392304-141392840|MACS_peak_3246	31	12	4	9	18.6717	5.38818	1.66548	3.38551
chr3:193813271-193813918|MACS_peak_2272	31	17	4	5	18.6717	7.63325	1.66548	1.88084
chr17:37203056-37203639|MACS_peak_1008	31	18	4	4	18.6717	8.08227	1.66548	1.50467
chr5:16873281-16873965|MACS_peak_2439	31	23	4	4	18.6717	10.3273	1.66548	1.50467
chr7:6543038-6543527|MACS_peak_2865	31	8	3	3	18.6717	3.59212	1.24911	1.1285
chr17:80690371-80690929|MACS_peak_1122	31	15	3	7	18.6717	6.73522	1.24911	2.63317
chr1:108716741-108717404|MACS_peak_112	31	16	3	5	18.6717	7.18424	1.24911	1.88084
chr14:75053307-75053837|MACS_peak_726	31	15	1	6	18.6717	6.73522	0.41637	2.257
chr8:143451497-143452015|MACS_peak_3312	30	17	14	16	18.0694	7.63325	5.82917	6.01868
chr22:28176065-28176647|MACS_peak_2079	30	29	14	7	18.0694	13.0214	5.82917	2.63317
chr22:35580725-35581316|MACS_peak_2107	30	15	12	12	18.0694	6.73522	4.99643	4.51401
chr1:45803493-45804068|MACS_peak_86	30	22	12	9	18.0694	9.87832	4.99643	3.38551
chr8:143386093-143386796|MACS_peak_3292	30	18	11	3	18.0694	8.08227	4.58007	1.1285
chr17:63966571-63967190|MACS_peak_1065	30	25	11	12	18.0694	11.2254	4.58007	4.51401
chr7:6727950-6728493|MACS_peak_2890	30	33	11	10	18.0694	14.8175	4.58007	3.76167
chr8:146004573-146005133|MACS_peak_3421	30	13	10	13	18.0694	5.83719	4.1637	4.89018
chr20:60650652-60651176|MACS_peak_1937	30	15	10	10	18.0694	6.73522	4.1637	3.76167
chr2:114737316-114737845|MACS_peak_1723	30	16	10	6	18.0694	7.18424	4.1637	2.257
chr15:63397956-63398442|MACS_peak_778	30	19	10	9	18.0694	8.53128	4.1637	3.38551
chr12:10799477-10800050|MACS_peak_489	30	16	8	7	18.0694	7.18424	3.33096	2.63317
chr17:58566104-58566598|MACS_peak_1035	30	19	8	17	18.0694	8.53128	3.33096	6.39485
chr7:6528739-6529318|MACS_peak_2864	30	22	8	9	18.0694	9.87832	3.33096	3.38551
chr7:6159302-6159801|MACS_peak_2862	30	23	8	7	18.0694	10.3273	3.33096	2.63317
chr14:67371063-67371738|MACS_peak_683	30	15	7	8	18.0694	6.73522	2.91459	3.00934
chr8:143503519-143504078|MACS_peak_3319	30	7	6	13	18.0694	3.1431	2.49822	4.89018
chr17:62368746-62369386|MACS_peak_1061	30	18	6	7	18.0694	8.08227	2.49822	2.63317
chr2:71212929-71213477|MACS_peak_1630	30	25	6	16	18.0694	11.2254	2.49822	6.01868
chr22:35868390-35868950|MACS_peak_2114	30	13	5	6	18.0694	5.83719	2.08185	2.257
chr20:50704560-50705186|MACS_peak_1893	30	15	5	10	18.0694	6.73522	2.08185	3.76167
chr4:30679737-30680318|MACS_peak_2290	30	16	5	10	18.0694	7.18424	2.08185	3.76167
chr22:35887891-35888526|MACS_peak_2118	30	17	5	7	18.0694	7.63325	2.08185	2.63317
chr16:3356361-3356913|MACS_peak_832	30	19	5	10	18.0694	8.53128	2.08185	3.76167
chr3:48698343-48698874|MACS_peak_2225	30	8	4	6	18.0694	3.59212	1.66548	2.257
chr3:125677536-125678194|MACS_peak_2259	30	11	4	6	18.0694	4.93916	1.66548	2.257
chr14:77358179-77358715|MACS_peak_730	30	13	4	4	18.0694	5.83719	1.66548	1.50467
chr12:133503876-133504493|MACS_peak_556	30	13	4	4	18.0694	5.83719	1.66548	1.50467
chr2:10337030-10337691|MACS_peak_1537	30	17	4	9	18.0694	7.63325	1.66548	3.38551
chr22:47223524-47224089|MACS_peak_2148	30	8	3	2	18.0694	3.59212	1.24911	0.752335
chr18:76412744-76413277|MACS_peak_1227	30	6	2	2	18.0694	2.69409	0.832739	0.752335
chrX:100654308-100654833|MACS_peak_3566	30	10	2	3	18.0694	4.49015	0.832739	1.1285
chr8:139759418-139760052|MACS_peak_3177	29	22	13	14	17.4671	9.87832	5.4128	5.26634
chr22:28062966-28063381|MACS_peak_2074	29	11	11	12	17.4671	4.93916	4.58007	4.51401
chr8:135247508-135248071|MACS_peak_3150	29	15	11	5	17.4671	6.73522	4.58007	1.88084
chr8:123745634-123746224|MACS_peak_3112	29	16	10	11	17.4671	7.18424	4.1637	4.13784
chr8:145806070-145806656|MACS_peak_3381	29	16	10	6	17.4671	7.18424	4.1637	2.257
chr9:69840043-69840557|MACS_peak_3497	29	14	9	14	17.4671	6.28621	3.74733	5.26634
chr20:55130660-55131258|MACS_peak_1902	29	15	9	10	17.4671	6.73522	3.74733	3.76167
chr7:6725095-6725612|MACS_peak_2888	29	15	9	12	17.4671	6.73522	3.74733	4.51401
chr17:59474658-59475276|MACS_peak_1039	29	17	9	8	17.4671	7.63325	3.74733	3.00934
chr10:105512176-105512762|MACS_peak_360	29	17	9	6	17.4671	7.63325	3.74733	2.257
chr15:20549747-20550367|MACS_peak_745	29	23	9	8	17.4671	10.3273	3.74733	3.00934
chr3:98877759-98878364|MACS_peak_2242	29	11	8	6	17.4671	4.93916	3.33096	2.257
chr7:3006068-3006685|MACS_peak_2785	29	12	8	12	17.4671	5.38818	3.33096	4.51401
chr14:64060874-64061360|MACS_peak_661	29	17	8	7	17.4671	7.63325	3.33096	2.63317
chr7:6714428-6715027|MACS_peak_2881	29	24	8	10	17.4671	10.7764	3.33096	3.76167
chr15:20307424-20307782|MACS_peak_736	29	6	7	7	17.4671	2.69409	2.91459	2.63317
chr8:145813435-145813894|MACS_peak_3384	29	8	7	8	17.4671	3.59212	2.91459	3.00934
chr17:17210408-17210889|MACS_peak_982	29	17	7	7	17.4671	7.63325	2.91459	2.63317
chr8:145929675-145930190|MACS_peak_3407	29	18	7	6	17.4671	8.08227	2.91459	2.257
chr22:28088818-28089379|MACS_peak_2075	29	21	7	10	17.4671	9.42931	2.91459	3.76167
chr7:5099042-5099726|MACS_peak_2829	29	23	7	12	17.4671	10.3273	2.91459	4.51401
chr8:145816087-145816706|MACS_peak_3386	29	25	7	6	17.4671	11.2254	2.91459	2.257
chr18:12777595-12778094|MACS_peak_1178	29	7	6	8	17.4671	3.1431	2.49822	3.00934
chr10:43016680-43017192|MACS_peak_266	29	14	6	8	17.4671	6.28621	2.49822	3.00934
chr15:20548902-20549470|MACS_peak_744	29	11	5	8	17.4671	4.93916	2.08185	3.00934
chr12:57550324-57550941|MACS_peak_525	29	11	5	7	17.4671	4.93916	2.08185	2.63317
chr7:5643353-5643964|MACS_peak_2861	29	16	5	10	17.4671	7.18424	2.08185	3.76167
chr7:6694359-6694852|MACS_peak_2873	29	13	4	4	17.4671	5.83719	1.66548	1.50467
chr4:75119203-75119747|MACS_peak_2369	29	17	4	2	17.4671	7.63325	1.66548	0.752335
chr2:71691461-71691930|MACS_peak_1632	29	18	4	10	17.4671	8.08227	1.66548	3.76167
chr8:142953784-142954473|MACS_peak_3269	29	23	4	4	17.4671	10.3273	1.66548	1.50467
chr19:37239840-37240465|MACS_peak_1359	29	29	4	11	17.4671	13.0214	1.66548	4.13784
chr1:52424385-52424979|MACS_peak_94	29	14	3	3	17.4671	6.28621	1.24911	1.1285
chr15:90555066-90555569|MACS_peak_808	29	18	3	12	17.4671	8.08227	1.24911	4.51401
chr13:112690673-112691200|MACS_peak_583	29	3	2	2	17.4671	1.34704	0.832739	0.752335
chr1:114785278-114785765|MACS_peak_129	29	5	2	1	17.4671	2.24507	0.832739	0.376167
chr2:42328533-42328968|MACS_peak_1590	29	7	2	6	17.4671	3.1431	0.832739	2.257
chr7:295583-296071|MACS_peak_2690	29	10	1	2	17.4671	4.49015	0.41637	0.752335
chr18:12558998-12559667|MACS_peak_1176	29	13	1	3	17.4671	5.83719	0.41637	1.1285
chr9:130285831-130286338|MACS_peak_3522	29	15	1	3	17.4671	6.73522	0.41637	1.1285
chr8:128567093-128567740|MACS_peak_3131	28	17	13	13	16.8648	7.63325	5.4128	4.89018
chr7:2070068-2070608|MACS_peak_2767	28	15	12	6	16.8648	6.73522	4.99643	2.257
chr2:89844751-89845275|MACS_peak_1652	28	18	12	19	16.8648	8.08227	4.99643	7.14718
chr7:61825159-61825692|MACS_peak_2973	28	22	12	10	16.8648	9.87832	4.99643	3.76167
chr8:145926576-145927162|MACS_peak_3406	28	11	11	10	16.8648	4.93916	4.58007	3.76167
chr8:126470520-126471127|MACS_peak_3124	28	20	11	11	16.8648	8.98029	4.58007	4.13784
chr16:80647822-80648304|MACS_peak_932	28	14	10	11	16.8648	6.28621	4.1637	4.13784
chr15:20500475-20500994|MACS_peak_742	28	17	10	5	16.8648	7.63325	4.1637	1.88084
chr8:141982281-141982771|MACS_peak_3248	28	18	10	14	16.8648	8.08227	4.1637	5.26634
chr14:68392344-68392907|MACS_peak_687	28	7	9	5	16.8648	3.1431	3.74733	1.88084
chr16:3340135-3340679|MACS_peak_830	28	17	9	7	16.8648	7.63325	3.74733	2.63317
chr10:79711362-79711769|MACS_peak_340	28	11	8	7	16.8648	4.93916	3.33096	2.63317
chr2:9998429-9999008|MACS_peak_1534	28	26	8	6	16.8648	11.6744	3.33096	2.257
chr19:30867493-30868041|MACS_peak_1314	28	5	7	6	16.8648	2.24507	2.91459	2.257
chr8:140869010-140869552|MACS_peak_3223	28	7	7	3	16.8648	3.1431	2.91459	1.1285
chr10:32794706-32795242|MACS_peak_220	28	9	7	3	16.8648	4.04113	2.91459	1.1285
chr22:21332608-21333112|MACS_peak_2017	28	10	7	5	16.8648	4.49015	2.91459	1.88084
chr9:69841306-69841866|MACS_peak_3498	28	12	7	10	16.8648	5.38818	2.91459	3.76167
chr17:65428637-65429114|MACS_peak_1066	28	14	7	9	16.8648	6.28621	2.91459	3.38551
chr14:65240349-65240808|MACS_peak_668	28	14	7	5	16.8648	6.28621	2.91459	1.88084
chr16:4805183-4805712|MACS_peak_847	28	16	7	7	16.8648	7.18424	2.91459	2.63317
chr7:24825114-24825678|MACS_peak_2903	28	17	7	9	16.8648	7.63325	2.91459	3.38551
chr8:126381428-126381894|MACS_peak_3122	28	21	7	8	16.8648	9.42931	2.91459	3.00934
chr2:28191020-28191636|MACS_peak_1565	28	19	6	9	16.8648	8.53128	2.49822	3.38551
chr18:13278074-13278551|MACS_peak_1188	28	21	6	9	16.8648	9.42931	2.49822	3.38551
chr2:105223909-105224524|MACS_peak_1705	28	22	6	9	16.8648	9.87832	2.49822	3.38551
chr5:54908930-54909474|MACS_peak_2491	28	7	5	6	16.8648	3.1431	2.08185	2.257
chr16:89652985-89653471|MACS_peak_967	28	14	5	6	16.8648	6.28621	2.08185	2.257
chr14:55038875-55039351|MACS_peak_623	28	16	5	12	16.8648	7.18424	2.08185	4.51401
chr8:144250684-144251203|MACS_peak_3342	28	1	4	9	16.8648	0.449015	1.66548	3.38551
chr22:50094506-50094990|MACS_peak_2176	28	7	4	3	16.8648	3.1431	1.66548	1.1285
chr15:30014471-30014943|MACS_peak_763	28	7	4	1	16.8648	3.1431	1.66548	0.376167
chr16:85216912-85217366|MACS_peak_944	28	11	4	5	16.8648	4.93916	1.66548	1.88084
chr19:44357775-44358201|MACS_peak_1414	28	12	4	7	16.8648	5.38818	1.66548	2.63317
chr1:40929434-40929881|MACS_peak_56	28	23	4	8	16.8648	10.3273	1.66548	3.00934
chr7:727492-728146|MACS_peak_2719	28	9	3	5	16.8648	4.04113	1.24911	1.88084
chr8:142953158-142953553|MACS_peak_3268	28	9	3	3	16.8648	4.04113	1.24911	1.1285
chr17:47659642-47660194|MACS_peak_1024	28	8	2	4	16.8648	3.59212	0.832739	1.50467
chr21:45910157-45910703|MACS_peak_2001	28	9	2	4	16.8648	4.04113	0.832739	1.50467
chr22:50705291-50705798|MACS_peak_2180	28	13	2	4	16.8648	5.83719	0.832739	1.50467
chr5:140698333-140698802|MACS_peak_2530	28	16	2	6	16.8648	7.18424	0.832739	2.257
chr22:37132730-37133295|MACS_peak_2120	28	17	2	5	16.8648	7.63325	0.832739	1.88084
chr7:73958861-73959475|MACS_peak_3019	28	17	2	7	16.8648	7.63325	0.832739	2.63317
chr14:66183358-66183927|MACS_peak_675	28	6	0	5	16.8648	2.69409	0	1.88084
chr22:35173936-35174499|MACS_peak_2097	27	14	12	12	16.2625	6.28621	4.99643	4.51401
chr8:144150036-144150573|MACS_peak_3337	27	16	11	9	16.2625	7.18424	4.58007	3.38551
chr18:14997217-14997718|MACS_peak_1207	27	11	10	5	16.2625	4.93916	4.1637	1.88084
chr2:110060774-110061266|MACS_peak_1711	27	14	10	9	16.2625	6.28621	4.1637	3.38551
chr8:133261928-133262612|MACS_peak_3141	27	22	10	11	16.2625	9.87832	4.1637	4.13784
chr10:43975594-43976185|MACS_peak_276	27	7	9	10	16.2625	3.1431	3.74733	3.76167
chr9:101126941-101127384|MACS_peak_3514	27	15	9	4	16.2625	6.73522	3.74733	1.50467
chr9:35509354-35509911|MACS_peak_3472	27	29	9	8	16.2625	13.0214	3.74733	3.00934
chr14:43604986-43605462|MACS_peak_605	27	7	8	1	16.2625	3.1431	3.33096	0.376167
chr8:146207827-146208314|MACS_peak_3451	27	15	8	7	16.2625	6.73522	3.33096	2.63317
chr20:56793622-56794178|MACS_peak_1913	27	17	8	3	16.2625	7.63325	3.33096	1.1285
chr5:71666907-71667446|MACS_peak_2499	27	12	7	4	16.2625	5.38818	2.91459	1.50467
chr20:42331135-42331772|MACS_peak_1837	27	14	7	6	16.2625	6.28621	2.91459	2.257
chr7:30493593-30494043|MACS_peak_2907	27	20	7	8	16.2625	8.98029	2.91459	3.00934
chr6:37830887-37831475|MACS_peak_2612	27	22	7	13	16.2625	9.87832	2.91459	4.89018
chr20:46325730-46326298|MACS_peak_1861	27	9	6	6	16.2625	4.04113	2.49822	2.257
chr20:57617286-57617729|MACS_peak_1928	27	9	6	11	16.2625	4.04113	2.49822	4.13784
chr12:124811032-124811625|MACS_peak_546	27	8	5	3	16.2625	3.59212	2.08185	1.1285
chr1:22904493-22905116|MACS_peak_26	27	12	5	5	16.2625	5.38818	2.08185	1.88084
chr19:44473686-44474175|MACS_peak_1429	27	13	5	3	16.2625	5.83719	2.08185	1.1285
chr18:77333887-77334368|MACS_peak_1236	27	16	5	3	16.2625	7.18424	2.08185	1.1285
chr12:124953836-124954320|MACS_peak_547	27	18	5	5	16.2625	8.08227	2.08185	1.88084
chr12:133654627-133655156|MACS_peak_563	27	7	4	5	16.2625	3.1431	1.66548	1.88084
chr7:2472035-2472534|MACS_peak_2781	27	9	4	5	16.2625	4.04113	1.66548	1.88084
chr5:150447190-150447679|MACS_peak_2541	27	13	4	5	16.2625	5.83719	1.66548	1.88084
chr5:649089-649611|MACS_peak_2393	27	22	4	4	16.2625	9.87832	1.66548	1.50467
chr4:64214951-64215421|MACS_peak_2359	27	7	3	1	16.2625	3.1431	1.24911	0.376167
chr5:25614589-25615056|MACS_peak_2443	27	9	3	4	16.2625	4.04113	1.24911	1.50467
chr18:14223402-14223972|MACS_peak_1205	27	10	3	2	16.2625	4.49015	1.24911	0.752335
chr19:44419411-44419902|MACS_peak_1423	27	11	3	5	16.2625	4.93916	1.24911	1.88084
chr17:57249888-57250349|MACS_peak_1031	27	13	3	6	16.2625	5.83719	1.24911	2.257
chr10:79727335-79727862|MACS_peak_341	27	13	3	10	16.2625	5.83719	1.24911	3.76167
chr10:82573794-82574249|MACS_peak_347	27	9	2	4	16.2625	4.04113	0.832739	1.50467
chr19:246449-246933|MACS_peak_1249	27	10	2	0	16.2625	4.49015	0.832739	0
chr22:19414466-19414934|MACS_peak_2006	27	11	2	11	16.2625	4.93916	0.832739	4.13784
chr2:38302079-38302595|MACS_peak_1582	27	11	2	4	16.2625	4.93916	0.832739	1.50467
chr5:42952317-42952808|MACS_peak_2478	27	11	2	7	16.2625	4.93916	0.832739	2.63317
chr15:62562164-62562692|MACS_peak_776	27	22	2	6	16.2625	9.87832	0.832739	2.257
chr9:44875365-44875876|MACS_peak_3485	27	8	1	1	16.2625	3.59212	0.41637	0.376167
chr18:77659338-77659811|MACS_peak_1243	27	13	1	2	16.2625	5.83719	0.41637	0.752335
chr7:2522457-2522994|MACS_peak_2782	26	15	12	13	15.6601	6.73522	4.99643	4.89018
chr8:145933256-145933832|MACS_peak_3411	26	13	11	11	15.6601	5.83719	4.58007	4.13784
chr7:5475560-5476103|MACS_peak_2853	26	15	11	9	15.6601	6.73522	4.58007	3.38551
chr7:1351775-1352266|MACS_peak_2727	26	10	10	3	15.6601	4.49015	4.1637	1.1285
chr7:5130908-5131517|MACS_peak_2835	26	13	10	17	15.6601	5.83719	4.1637	6.39485
chr8:143028116-143028784|MACS_peak_3276	26	18	10	6	15.6601	8.08227	4.1637	2.257
chr8:143993313-143993863|MACS_peak_3333	26	10	9	5	15.6601	4.49015	3.74733	1.88084
chr7:32150923-32151424|MACS_peak_2910	26	6	8	4	15.6601	2.69409	3.33096	1.50467
chr4:49213570-49214127|MACS_peak_2332	26	17	8	14	15.6601	7.63325	3.33096	5.26634
chr1:40962883-40963357|MACS_peak_59	26	20	8	8	15.6601	8.98029	3.33096	3.00934
chr7:4464127-4464659|MACS_peak_2810	26	6	7	5	15.6601	2.69409	2.91459	1.88084
chr7:4462398-4462875|MACS_peak_2808	26	8	7	10	15.6601	3.59212	2.91459	3.76167
chr7:4540418-4540927|MACS_peak_2813	26	8	7	7	15.6601	3.59212	2.91459	2.63317
chr22:37660007-37660609|MACS_peak_2123	26	14	7	10	15.6601	6.28621	2.91459	3.76167
chr14:67411155-67411712|MACS_peak_684	26	18	7	3	15.6601	8.08227	2.91459	1.1285
chr7:2063807-2064401|MACS_peak_2764	26	19	7	11	15.6601	8.53128	2.91459	4.13784
chr2:194700934-194701508|MACS_peak_1771	26	10	6	4	15.6601	4.49015	2.49822	1.50467
chr8:140749162-140749633|MACS_peak_3196	26	13	6	3	15.6601	5.83719	2.49822	1.1285
chr8:140839387-140839923|MACS_peak_3215	26	13	6	4	15.6601	5.83719	2.49822	1.50467
chr12:133682085-133682588|MACS_peak_567	26	14	6	6	15.6601	6.28621	2.49822	2.257
chr8:140787223-140787799|MACS_peak_3207	26	14	6	5	15.6601	6.28621	2.49822	1.88084
chr7:6740141-6740668|MACS_peak_2894	26	16	6	6	15.6601	7.18424	2.49822	2.257
chr19:44991701-44992345|MACS_peak_1442	26	9	5	2	15.6601	4.04113	2.08185	0.752335
chr9:68300232-68300701|MACS_peak_3493	26	12	5	2	15.6601	5.38818	2.08185	0.752335
chr10:42377289-42377880|MACS_peak_243	26	13	5	12	15.6601	5.83719	2.08185	4.51401
chr21:34909657-34910207|MACS_peak_1995	26	15	5	2	15.6601	6.73522	2.08185	0.752335
chr16:1380192-1380698|MACS_peak_816	26	8	4	8	15.6601	3.59212	1.66548	3.00934
chr16:3358965-3359460|MACS_peak_836	26	9	4	7	15.6601	4.04113	1.66548	2.63317
chr10:31756808-31757327|MACS_peak_219	26	10	4	6	15.6601	4.49015	1.66548	2.257
chr7:1060466-1060899|MACS_peak_2723	26	10	4	7	15.6601	4.49015	1.66548	2.63317
chr12:51750727-51751274|MACS_peak_522	26	13	4	7	15.6601	5.83719	1.66548	2.63317
chr8:132499271-132499870|MACS_peak_3140	26	14	4	6	15.6601	6.28621	1.66548	2.257
chr8:135686078-135686581|MACS_peak_3156	26	18	4	6	15.6601	8.08227	1.66548	2.257
chr17:36624605-36625105|MACS_peak_1004	26	22	4	1	15.6601	9.87832	1.66548	0.376167
chr5:43813648-43814202|MACS_peak_2483	26	10	3	6	15.6601	4.49015	1.24911	2.257
chr1:2629026-2629493|MACS_peak_7	26	12	3	5	15.6601	5.38818	1.24911	1.88084
chr5:42149234-42149751|MACS_peak_2475	26	13	3	6	15.6601	5.83719	1.24911	2.257
chr8:140743317-140743813|MACS_peak_3192	26	19	3	7	15.6601	8.53128	1.24911	2.63317
chr1:110254500-110254981|MACS_peak_115	26	8	2	6	15.6601	3.59212	0.832739	2.257
chr5:108823422-108823959|MACS_peak_2511	26	8	2	0	15.6601	3.59212	0.832739	0
chr2:114359752-114360165|MACS_peak_1721	26	7	1	3	15.6601	3.1431	0.41637	1.1285
chr10:118031748-118032265|MACS_peak_368	26	7	1	2	15.6601	3.1431	0.41637	0.752335
chr7:62547503-62547907|MACS_peak_2984	26	11	1	2	15.6601	4.93916	0.41637	0.752335
chr12:111741682-111742205|MACS_peak_531	26	15	1	7	15.6601	6.73522	0.41637	2.63317
chr20:49945672-49946206|MACS_peak_1888	25	10	12	15	15.0578	4.49015	4.99643	5.64251
chr16:71037765-71038231|MACS_peak_918	25	14	12	13	15.0578	6.28621	4.99643	4.89018
chr21:30625300-30625876|MACS_peak_1982	25	16	11	5	15.0578	7.18424	4.58007	1.88084
chr1:143283210-143283532|MACS_peak_142	25	24	11	17	15.0578	10.7764	4.58007	6.39485
chr1:236260404-236260838|MACS_peak_178	25	8	10	9	15.0578	3.59212	4.1637	3.38551
chr9:27417402-27417892|MACS_peak_3459	25	13	10	9	15.0578	5.83719	4.1637	3.38551
chr17:71480363-71480959|MACS_peak_1087	25	15	10	5	15.0578	6.73522	4.1637	1.88084
chr5:36645513-36645964|MACS_peak_2462	25	9	9	6	15.0578	4.04113	3.74733	2.257
chr5:179688024-179688452|MACS_peak_2582	25	13	9	6	15.0578	5.83719	3.74733	2.257
chr9:27788839-27789363|MACS_peak_3460	25	16	9	4	15.0578	7.18424	3.74733	1.50467
chr22:26217277-26217766|MACS_peak_2050	25	20	9	8	15.0578	8.98029	3.74733	3.00934
chr16:3434061-3434497|MACS_peak_845	25	22	9	5	15.0578	9.87832	3.74733	1.88084
chr22:27650001-27650516|MACS_peak_2068	25	5	8	15	15.0578	2.24507	3.33096	5.64251
chr12:47662268-47662740|MACS_peak_519	25	9	8	6	15.0578	4.04113	3.33096	2.257
chr1:59356884-59357469|MACS_peak_97	25	11	8	7	15.0578	4.93916	3.33096	2.63317
chr6:64588153-64588763|MACS_peak_2643	25	11	8	7	15.0578	4.93916	3.33096	2.63317
chr7:6695560-6696051|MACS_peak_2874	25	13	8	2	15.0578	5.83719	3.33096	0.752335
chr17:60082760-60083234|MACS_peak_1048	25	22	8	10	15.0578	9.87832	3.33096	3.76167
chr1:143536657-143537108|MACS_peak_143	25	28	8	18	15.0578	12.5724	3.33096	6.77101
chr10:42859079-42859611|MACS_peak_261	25	8	7	10	15.0578	3.59212	2.91459	3.76167
chr2:89853590-89853990|MACS_peak_1656	25	10	7	10	15.0578	4.49015	2.91459	3.76167
chr5:14061116-14061638|MACS_peak_2431	25	15	7	12	15.0578	6.73522	2.91459	4.51401
chr5:4394668-4395197|MACS_peak_2417	25	5	6	5	15.0578	2.24507	2.49822	1.88084
chr12:4093634-4094110|MACS_peak_481	25	7	6	2	15.0578	3.1431	2.49822	0.752335
chr7:56184011-56184528|MACS_peak_2959	25	7	6	7	15.0578	3.1431	2.49822	2.63317
chr22:49778878-49779367|MACS_peak_2172	25	10	6	8	15.0578	4.49015	2.49822	3.00934
chr7:1155568-1156101|MACS_peak_2726	25	10	6	13	15.0578	4.49015	2.49822	4.89018
chr4:89281948-89282472|MACS_peak_2378	25	10	6	4	15.0578	4.49015	2.49822	1.50467
chr18:7814980-7815508|MACS_peak_1154	25	11	6	6	15.0578	4.93916	2.49822	2.257
chr8:146039355-146039844|MACS_peak_3422	25	11	6	4	15.0578	4.93916	2.49822	1.50467
chr16:46411287-46411606|MACS_peak_891	25	20	6	8	15.0578	8.98029	2.49822	3.00934
chr8:84944364-84944996|MACS_peak_3070	25	6	5	8	15.0578	2.69409	2.08185	3.00934
chr14:46576456-46576922|MACS_peak_609	25	7	5	4	15.0578	3.1431	2.08185	1.50467
chr5:1026512-1027031|MACS_peak_2397	25	8	5	0	15.0578	3.59212	2.08185	0
chr19:8133652-8134240|MACS_peak_1262	25	9	5	6	15.0578	4.04113	2.08185	2.257
chr7:1747707-1748198|MACS_peak_2737	25	9	5	7	15.0578	4.04113	2.08185	2.63317
chr22:49782524-49782995|MACS_peak_2173	25	12	5	5	15.0578	5.38818	2.08185	1.88084
chr18:77332592-77333102|MACS_peak_1234	25	12	5	6	15.0578	5.38818	2.08185	2.257
chr2:101789429-101790005|MACS_peak_1698	25	14	5	11	15.0578	6.28621	2.08185	4.13784
chr7:2236841-2237320|MACS_peak_2777	25	14	5	5	15.0578	6.28621	2.08185	1.88084
chr17:41426148-41426702|MACS_peak_1014	25	19	5	7	15.0578	8.53128	2.08185	2.63317
chr20:56965300-56965797|MACS_peak_1916	25	19	5	12	15.0578	8.53128	2.08185	4.51401
chr7:1868675-1869244|MACS_peak_2749	25	6	4	5	15.0578	2.69409	1.66548	1.88084
chr8:145891726-145892196|MACS_peak_3401	25	7	4	11	15.0578	3.1431	1.66548	4.13784
chr8:136025049-136025559|MACS_peak_3160	25	11	4	9	15.0578	4.93916	1.66548	3.38551
chr6:35867375-35867817|MACS_peak_2602	25	15	4	8	15.0578	6.73522	1.66548	3.00934
chr7:5360748-5361205|MACS_peak_2848	25	16	4	7	15.0578	7.18424	1.66548	2.63317
chr10:43979221-43979716|MACS_peak_277	25	17	4	12	15.0578	7.63325	1.66548	4.51401
chr12:133655528-133656096|MACS_peak_565	25	19	4	3	15.0578	8.53128	1.66548	1.1285
chr17:66596136-66596608|MACS_peak_1068	25	6	3	2	15.0578	2.69409	1.24911	0.752335
chr8:136416719-136417252|MACS_peak_3163	25	8	3	3	15.0578	3.59212	1.24911	1.1285
chr20:57895531-57896082|MACS_peak_1930	25	10	3	3	15.0578	4.49015	1.24911	1.1285
chr6:131375573-131376181|MACS_peak_2661	25	10	3	9	15.0578	4.49015	1.24911	3.38551
chr1:110470233-110470879|MACS_peak_121	25	15	3	7	15.0578	6.73522	1.24911	2.63317
chr5:32187115-32187657|MACS_peak_2452	25	18	3	5	15.0578	8.08227	1.24911	1.88084
chr19:44472836-44473296|MACS_peak_1428	25	23	3	4	15.0578	10.3273	1.24911	1.50467
chr2:25121766-25122302|MACS_peak_1559	25	8	2	3	15.0578	3.59212	0.832739	1.1285
chr5:7849792-7850296|MACS_peak_2419	25	8	2	7	15.0578	3.59212	0.832739	2.63317
chr17:59531708-59532325|MACS_peak_1043	25	12	2	4	15.0578	5.38818	0.832739	1.50467
chr16:10478978-10479454|MACS_peak_851	25	8	1	3	15.0578	3.59212	0.41637	1.1285
chr17:74610883-74611418|MACS_peak_1096	25	14	1	5	15.0578	6.28621	0.41637	1.88084
chr12:114163721-114164173|MACS_peak_533	25	15	1	1	15.0578	6.73522	0.41637	0.376167
chr16:3338300-3338776|MACS_peak_828	25	19	1	6	15.0578	8.53128	0.41637	2.257
chr1:1886546-1887028|MACS_peak_3	25	9	0	1	15.0578	4.04113	0	0.376167
chr19:44838696-44839148|MACS_peak_1433	25	18	0	3	15.0578	8.08227	0	1.1285
chr10:46978329-46978780|MACS_peak_301	24	8	11	8	14.4555	3.59212	4.58007	3.00934
chr8:142955451-142955827|MACS_peak_3270	24	9	11	9	14.4555	4.04113	4.58007	3.38551
chr2:89857644-89858196|MACS_peak_1657	24	21	11	14	14.4555	9.42931	4.58007	5.26634
chr4:49324990-49325388|MACS_peak_2338	24	19	10	9	14.4555	8.53128	4.1637	3.38551
chr17:58570227-58570733|MACS_peak_1037	24	8	9	13	14.4555	3.59212	3.74733	4.89018
chr8:140769674-140770169|MACS_peak_3204	24	10	9	7	14.4555	4.49015	3.74733	2.63317
chr8:143465144-143465739|MACS_peak_3315	24	12	9	14	14.4555	5.38818	3.74733	5.26634
chr7:6768516-6769015|MACS_peak_2897	24	13	9	11	14.4555	5.83719	3.74733	4.13784
chr8:144651576-144652122|MACS_peak_3351	24	14	9	7	14.4555	6.28621	3.74733	2.63317
chr10:120587212-120587659|MACS_peak_371	24	5	8	3	14.4555	2.24507	3.33096	1.1285
chr8:143885783-143886298|MACS_peak_3330	24	7	8	10	14.4555	3.1431	3.33096	3.76167
chr8:143729825-143730311|MACS_peak_3324	24	8	8	8	14.4555	3.59212	3.33096	3.00934
chr2:24338897-24339378|MACS_peak_1554	24	18	8	6	14.4555	8.08227	3.33096	2.257
chr8:143223795-143224269|MACS_peak_3282	24	8	7	9	14.4555	3.59212	2.91459	3.38551
chr5:132800944-132801363|MACS_peak_2524	24	14	7	4	14.4555	6.28621	2.91459	1.50467
chr6:46891160-46891539|MACS_peak_2626	24	4	6	5	14.4555	1.79606	2.49822	1.88084
chr22:37054758-37055293|MACS_peak_2119	24	6	6	6	14.4555	2.69409	2.49822	2.257
chr7:5111453-5111917|MACS_peak_2834	24	7	6	11	14.4555	3.1431	2.49822	4.13784
chr18:6695710-6696188|MACS_peak_1152	24	8	6	3	14.4555	3.59212	2.49822	1.1285
chr17:56026548-56026977|MACS_peak_1029	24	9	6	8	14.4555	4.04113	2.49822	3.00934
chr20:45769895-45770416|MACS_peak_1856	24	20	6	7	14.4555	8.98029	2.49822	2.63317
chr7:4014642-4015169|MACS_peak_2790	24	20	6	8	14.4555	8.98029	2.49822	3.00934
chr6:34485706-34486287|MACS_peak_2599	24	5	5	7	14.4555	2.24507	2.08185	2.63317
chr20:45702668-45703136|MACS_peak_1854	24	9	5	10	14.4555	4.04113	2.08185	3.76167
chr7:5157134-5157597|MACS_peak_2841	24	9	5	7	14.4555	4.04113	2.08185	2.63317
chr1:116840572-116841063|MACS_peak_134	24	10	5	4	14.4555	4.49015	2.08185	1.50467
chr8:145934070-145934612|MACS_peak_3412	24	13	5	11	14.4555	5.83719	2.08185	4.13784
chr14:68602177-68602591|MACS_peak_690	24	14	5	5	14.4555	6.28621	2.08185	1.88084
chr8:144497033-144497504|MACS_peak_3347	24	16	5	12	14.4555	7.18424	2.08185	4.51401
chr20:61208241-61208693|MACS_peak_1948	24	22	5	7	14.4555	9.87832	2.08185	2.63317
chr2:96498319-96498729|MACS_peak_1685	24	3	4	1	14.4555	1.34704	1.66548	0.376167
chr11:58162605-58163080|MACS_peak_418	24	10	4	10	14.4555	4.49015	1.66548	3.76167
chr20:57426415-57426891|MACS_peak_1926	24	10	4	8	14.4555	4.49015	1.66548	3.00934
chr8:82117247-82117740|MACS_peak_3066	24	11	4	5	14.4555	4.93916	1.66548	1.88084
chr7:55193717-55194229|MACS_peak_2956	24	15	4	10	14.4555	6.73522	1.66548	3.76167
chr7:44738427-44738925|MACS_peak_2936	24	17	4	5	14.4555	7.63325	1.66548	1.88084
chr2:102133265-102133772|MACS_peak_1700	24	18	4	7	14.4555	8.08227	1.66548	2.63317
chr5:179237987-179238402|MACS_peak_2576	24	3	3	3	14.4555	1.34704	1.24911	1.1285
chr6:161442191-161442614|MACS_peak_2675	24	6	3	8	14.4555	2.69409	1.24911	3.00934
chr7:70178495-70178976|MACS_peak_3009	24	7	3	5	14.4555	3.1431	1.24911	1.88084
chr8:123964671-123965169|MACS_peak_3113	24	7	3	9	14.4555	3.1431	1.24911	3.38551
chr17:75872548-75873018|MACS_peak_1107	24	8	3	3	14.4555	3.59212	1.24911	1.1285
chr15:21315788-21316147|MACS_peak_747	24	11	3	8	14.4555	4.93916	1.24911	3.00934
chr7:5478860-5479310|MACS_peak_2856	24	11	3	5	14.4555	4.93916	1.24911	1.88084
chr8:143411109-143411544|MACS_peak_3305	24	17	3	4	14.4555	7.63325	1.24911	1.50467
chr7:6742640-6743081|MACS_peak_2895	24	27	3	11	14.4555	12.1234	1.24911	4.13784
chr20:4605294-4605805|MACS_peak_1812	24	10	2	5	14.4555	4.49015	0.832739	1.88084
chr14:57264646-57265112|MACS_peak_629	24	11	2	4	14.4555	4.93916	0.832739	1.50467
chr10:37037418-37037870|MACS_peak_227	24	11	2	5	14.4555	4.93916	0.832739	1.88084
chr20:57196224-57196698|MACS_peak_1925	24	14	2	8	14.4555	6.28621	0.832739	3.00934
chr14:55778796-55779193|MACS_peak_625	24	15	2	5	14.4555	6.73522	0.832739	1.88084
chr5:133909384-133909827|MACS_peak_2527	24	17	2	1	14.4555	7.63325	0.832739	0.376167
chr7:4686095-4686584|MACS_peak_2814	24	5	1	6	14.4555	2.24507	0.41637	2.257
chr10:95280830-95281283|MACS_peak_357	24	6	1	5	14.4555	2.69409	0.41637	1.88084
chr3:29742963-29743445|MACS_peak_2206	24	13	1	1	14.4555	5.83719	0.41637	0.376167
chr19:36748226-36748711|MACS_peak_1330	24	14	1	1	14.4555	6.28621	0.41637	0.376167
chr5:179679403-179679718|MACS_peak_2580	24	3	0	3	14.4555	1.34704	0	1.1285
chr12:12800864-12801330|MACS_peak_492	23	16	11	8	13.8532	7.18424	4.58007	3.00934
chr8:144749851-144750464|MACS_peak_3355	23	19	11	7	13.8532	8.53128	4.58007	2.63317
chr7:1376360-1376742|MACS_peak_2729	23	6	10	8	13.8532	2.69409	4.1637	3.00934
chr22:37722773-37723241|MACS_peak_2124	23	9	10	8	13.8532	4.04113	4.1637	3.00934
chr14:73245420-73245892|MACS_peak_721	23	10	10	9	13.8532	4.49015	4.1637	3.38551
chr7:5110083-5110645|MACS_peak_2833	23	17	10	5	13.8532	7.63325	4.1637	1.88084
chr8:136125745-136126334|MACS_peak_3161	23	18	10	10	13.8532	8.08227	4.1637	3.76167
chr1:41497013-41497518|MACS_peak_64	23	6	9	11	13.8532	2.69409	3.74733	4.13784
chr2:24337387-24337780|MACS_peak_1553	23	12	8	10	13.8532	5.38818	3.33096	3.76167
chr8:146198158-146198622|MACS_peak_3445	23	17	8	6	13.8532	7.63325	3.33096	2.257
chr8:143395597-143396068|MACS_peak_3295	23	18	8	4	13.8532	8.08227	3.33096	1.50467
chr22:35887133-35887666|MACS_peak_2117	23	4	7	5	13.8532	1.79606	2.91459	1.88084
chr8:145786564-145786983|MACS_peak_3377	23	4	7	5	13.8532	1.79606	2.91459	1.88084
chr16:70949642-70950074|MACS_peak_917	23	7	7	1	13.8532	3.1431	2.91459	0.376167
chr10:42640702-42641065|MACS_peak_254	23	7	7	14	13.8532	3.1431	2.91459	5.26634
chr9:137339400-137339956|MACS_peak_3540	23	7	7	4	13.8532	3.1431	2.91459	1.50467
chr14:52733924-52734406|MACS_peak_620	23	11	7	3	13.8532	4.93916	2.91459	1.1285
chr19:38041409-38041870|MACS_peak_1387	23	12	7	9	13.8532	5.38818	2.91459	3.38551
chr2:26940774-26941330|MACS_peak_1562	23	13	7	5	13.8532	5.83719	2.91459	1.88084
chr7:1543307-1543732|MACS_peak_2734	23	4	6	15	13.8532	1.79606	2.49822	5.64251
chr22:39185631-39186071|MACS_peak_2128	23	8	6	9	13.8532	3.59212	2.49822	3.38551
chr8:143454024-143454438|MACS_peak_3313	23	8	6	10	13.8532	3.59212	2.49822	3.76167
chr20:46318990-46319420|MACS_peak_1859	23	10	6	9	13.8532	4.49015	2.49822	3.38551
chr20:50703575-50704012|MACS_peak_1892	23	12	6	3	13.8532	5.38818	2.49822	1.1285
chr4:49325406-49325724|MACS_peak_2339	23	15	6	8	13.8532	6.73522	2.49822	3.00934
chr15:67047391-67047854|MACS_peak_783	23	16	6	6	13.8532	7.18424	2.49822	2.257
chr5:72231104-72231528|MACS_peak_2501	23	5	5	5	13.8532	2.24507	2.08185	1.88084
chr22:22813751-22814125|MACS_peak_2021	23	10	5	3	13.8532	4.49015	2.08185	1.1285
chr12:96818495-96818949|MACS_peak_529	23	10	5	3	13.8532	4.49015	2.08185	1.1285
chr7:1914179-1914689|MACS_peak_2754	23	11	5	8	13.8532	4.93916	2.08185	3.00934
chr12:3699942-3700390|MACS_peak_479	23	12	5	4	13.8532	5.38818	2.08185	1.50467
chr8:141045513-141045925|MACS_peak_3238	23	14	5	6	13.8532	6.28621	2.08185	2.257
chr19:44354499-44355065|MACS_peak_1412	23	16	5	7	13.8532	7.18424	2.08185	2.63317
chr8:144498091-144498539|MACS_peak_3348	23	20	5	7	13.8532	8.98029	2.08185	2.63317
chr18:77677256-77677740|MACS_peak_1246	23	6	4	1	13.8532	2.69409	1.66548	0.376167
chr12:14627200-14627659|MACS_peak_501	23	6	4	10	13.8532	2.69409	1.66548	3.76167
chr8:87977989-87978557|MACS_peak_3074	23	7	4	7	13.8532	3.1431	1.66548	2.63317
chr16:28993156-28993585|MACS_peak_861	23	9	4	6	13.8532	4.04113	1.66548	2.257
chr12:51751275-51751731|MACS_peak_523	23	9	4	5	13.8532	4.04113	1.66548	1.88084
chr12:1611116-1611555|MACS_peak_474	23	10	4	4	13.8532	4.49015	1.66548	1.50467
chr1:95195939-95196355|MACS_peak_110	23	12	4	3	13.8532	5.38818	1.66548	1.1285
chr8:140706508-140706957|MACS_peak_3189	23	12	4	6	13.8532	5.38818	1.66548	2.257
chr12:133486506-133486894|MACS_peak_554	23	2	3	3	13.8532	0.898029	1.24911	1.1285
chr4:58833112-58833599|MACS_peak_2357	23	3	3	3	13.8532	1.34704	1.24911	1.1285
chr2:106927055-106927466|MACS_peak_1708	23	4	3	7	13.8532	1.79606	1.24911	2.63317
chr20:46687299-46687699|MACS_peak_1867	23	5	3	2	13.8532	2.24507	1.24911	0.752335
chr5:12661982-12662488|MACS_peak_2429	23	7	3	0	13.8532	3.1431	1.24911	0
chr8:144516775-144517193|MACS_peak_3350	23	7	3	6	13.8532	3.1431	1.24911	2.257
chr22:35255135-35255607|MACS_peak_2102	23	11	3	6	13.8532	4.93916	1.24911	2.257
chr1:23691718-23692193|MACS_peak_30	23	12	3	8	13.8532	5.38818	1.24911	3.00934
chr7:44739040-44739489|MACS_peak_2937	23	13	3	9	13.8532	5.83719	1.24911	3.38551
chr5:1539876-1540357|MACS_peak_2406	23	17	3	5	13.8532	7.63325	1.24911	1.88084
chr12:111744908-111745334|MACS_peak_532	23	2	2	2	13.8532	0.898029	0.832739	0.752335
chr8:122679636-122680091|MACS_peak_3109	23	6	2	4	13.8532	2.69409	0.832739	1.50467
chr5:171682569-171683091|MACS_peak_2562	23	8	2	4	13.8532	3.59212	0.832739	1.50467
chr17:36103743-36104273|MACS_peak_1003	23	2	1	1	13.8532	0.898029	0.41637	0.376167
chr19:58707001-58707495|MACS_peak_1516	23	13	1	2	13.8532	5.83719	0.41637	0.752335
chr16:3275058-3275594|MACS_peak_827	23	13	1	5	13.8532	5.83719	0.41637	1.88084
chr20:46635477-46636056|MACS_peak_1865	23	13	1	8	13.8532	5.83719	0.41637	3.00934
chr8:140997805-140998211|MACS_peak_3234	23	13	1	6	13.8532	5.83719	0.41637	2.257
chr17:80692072-80692571|MACS_peak_1124	23	14	0	2	13.8532	6.28621	0	0.752335
chr11:86308950-86309387|MACS_peak_451	23	16	0	1	13.8532	7.18424	0	0.376167
chr7:47817053-47817559|MACS_peak_2946	22	10	10	6	13.2509	4.49015	4.1637	2.257
chr2:43511261-43511697|MACS_peak_1596	22	14	10	5	13.2509	6.28621	4.1637	1.88084
chr7:61100129-61100466|MACS_peak_2972	22	17	10	14	13.2509	7.63325	4.1637	5.26634
chr7:2070610-2071140|MACS_peak_2768	22	11	9	10	13.2509	4.93916	3.74733	3.76167
chr7:6715173-6715709|MACS_peak_2882	22	18	9	16	13.2509	8.08227	3.74733	6.01868
chr14:64056164-64056625|MACS_peak_660	22	9	8	6	13.2509	4.04113	3.33096	2.257
chr16:3356923-3357399|MACS_peak_833	22	12	8	3	13.2509	5.38818	3.33096	1.1285
chr10:42375314-42375866|MACS_peak_242	22	16	8	7	13.2509	7.18424	3.33096	2.63317
chr21:47481695-47482282|MACS_peak_2002	22	18	8	3	13.2509	8.08227	3.33096	1.1285
chr13:113843118-113843584|MACS_peak_592	22	21	8	9	13.2509	9.42931	3.33096	3.38551
chr9:68988973-68989407|MACS_peak_3494	22	9	7	3	13.2509	4.04113	2.91459	1.1285
chr7:4459294-4459722|MACS_peak_2806	22	11	7	8	13.2509	4.93916	2.91459	3.00934
chr8:145935067-145935503|MACS_peak_3413	22	11	7	8	13.2509	4.93916	2.91459	3.00934
chr4:49119874-49120276|MACS_peak_2324	22	13	7	11	13.2509	5.83719	2.91459	4.13784
chr8:130681839-130682313|MACS_peak_3133	22	18	7	7	13.2509	8.08227	2.91459	2.63317
chr1:247352090-247352531|MACS_peak_194	22	5	6	2	13.2509	2.24507	2.49822	0.752335
chr22:40066745-40067205|MACS_peak_2132	22	6	6	5	13.2509	2.69409	2.49822	1.88084
chr7:3776736-3777154|MACS_peak_2789	22	6	6	3	13.2509	2.69409	2.49822	1.1285
chr12:133704803-133705218|MACS_peak_569	22	9	6	3	13.2509	4.04113	2.49822	1.1285
chr18:14102030-14102475|MACS_peak_1203	22	10	6	8	13.2509	4.49015	2.49822	3.00934
chr1:152080566-152081105|MACS_peak_151	22	11	6	6	13.2509	4.93916	2.49822	2.257
chr4:54806407-54806931|MACS_peak_2351	22	11	6	8	13.2509	4.93916	2.49822	3.00934
chr8:145932306-145932778|MACS_peak_3409	22	15	6	7	13.2509	6.73522	2.49822	2.63317
chr12:133780194-133780675|MACS_peak_575	22	17	6	3	13.2509	7.63325	2.49822	1.1285
chr17:60216507-60216910|MACS_peak_1052	22	7	5	3	13.2509	3.1431	2.08185	1.1285
chr8:124766463-124766883|MACS_peak_3118	22	7	5	3	13.2509	3.1431	2.08185	1.1285
chr15:28700911-28701371|MACS_peak_761	22	8	5	6	13.2509	3.59212	2.08185	2.257
chr5:9478121-9478556|MACS_peak_2424	22	9	5	4	13.2509	4.04113	2.08185	1.50467
chr8:143499673-143500110|MACS_peak_3316	22	9	5	11	13.2509	4.04113	2.08185	4.13784
chr19:36941144-36941545|MACS_peak_1335	22	10	5	2	13.2509	4.49015	2.08185	0.752335
chr19:44471099-44471522|MACS_peak_1426	22	10	5	4	13.2509	4.49015	2.08185	1.50467
chr8:140787976-140788422|MACS_peak_3208	22	11	5	1	13.2509	4.93916	2.08185	0.376167
chr16:74761115-74761713|MACS_peak_926	22	12	5	5	13.2509	5.38818	2.08185	1.88084
chr11:1093184-1093614|MACS_peak_390	22	14	5	1	13.2509	6.28621	2.08185	0.376167
chr5:13244075-13244523|MACS_peak_2430	22	14	5	2	13.2509	6.28621	2.08185	0.752335
chr10:42373750-42374147|MACS_peak_241	22	16	5	13	13.2509	7.18424	2.08185	4.89018
chr18:19610662-19611163|MACS_peak_1213	22	17	5	7	13.2509	7.63325	2.08185	2.63317
chr10:71998666-71999098|MACS_peak_320	22	6	4	4	13.2509	2.69409	1.66548	1.50467
chr5:32712503-32712951|MACS_peak_2453	22	8	4	3	13.2509	3.59212	1.66548	1.1285
chr8:143383089-143383472|MACS_peak_3290	22	8	4	4	13.2509	3.59212	1.66548	1.50467
chr14:52675048-52675557|MACS_peak_619	22	9	4	6	13.2509	4.04113	1.66548	2.257
chr4:56219728-56220101|MACS_peak_2354	22	10	4	2	13.2509	4.49015	1.66548	0.752335
chr8:145825861-145826378|MACS_peak_3389	22	12	4	8	13.2509	5.38818	1.66548	3.00934
chr2:66017147-66017558|MACS_peak_1627	22	2	3	11	13.2509	0.898029	1.24911	4.13784
chr3:47401019-47401453|MACS_peak_2224	22	3	3	7	13.2509	1.34704	1.24911	2.63317
chr2:86727263-86727690|MACS_peak_1642	22	4	3	2	13.2509	1.79606	1.24911	0.752335
chr1:111506426-111506896|MACS_peak_126	22	4	3	4	13.2509	1.79606	1.24911	1.50467
chr8:140656836-140657254|MACS_peak_3183	22	5	3	6	13.2509	2.24507	1.24911	2.257
chr16:82042394-82042758|MACS_peak_936	22	7	3	4	13.2509	3.1431	1.24911	1.50467
chr2:9997583-9998054|MACS_peak_1533	22	7	3	5	13.2509	3.1431	1.24911	1.88084
chr1:11411442-11411861|MACS_peak_15	22	7	3	3	13.2509	3.1431	1.24911	1.1285
chr1:223288534-223288932|MACS_peak_169	22	8	3	4	13.2509	3.59212	1.24911	1.50467
chr8:139384408-139384882|MACS_peak_3175	22	8	3	10	13.2509	3.59212	1.24911	3.76167
chr5:73188082-73188480|MACS_peak_2503	22	9	3	5	13.2509	4.04113	1.24911	1.88084
chr22:19710309-19710754|MACS_peak_2008	22	10	3	4	13.2509	4.49015	1.24911	1.50467
chr9:137458728-137459206|MACS_peak_3542	22	11	3	4	13.2509	4.93916	1.24911	1.50467
chr8:88527235-88527677|MACS_peak_3075	22	14	3	3	13.2509	6.28621	1.24911	1.1285
chr1:23688480-23688895|MACS_peak_27	22	16	3	1	13.2509	7.18424	1.24911	0.376167
chr7:64387476-64387859|MACS_peak_3000	22	17	3	5	13.2509	7.63325	1.24911	1.88084
chr2:241465356-241465817|MACS_peak_1799	22	3	2	2	13.2509	1.34704	0.832739	0.752335
chr19:49693720-49694156|MACS_peak_1455	22	9	2	8	13.2509	4.04113	0.832739	3.00934
chr3:99898494-99898989|MACS_peak_2244	22	10	2	6	13.2509	4.49015	0.832739	2.257
chr11:76192206-76192595|MACS_peak_440	22	12	2	4	13.2509	5.38818	0.832739	1.50467
chr19:58775708-58776151|MACS_peak_1530	22	19	2	3	13.2509	8.53128	0.832739	1.1285
chr18:14107728-14108181|MACS_peak_1204	22	19	2	6	13.2509	8.53128	0.832739	2.257
chr2:129224681-129225133|MACS_peak_1743	22	6	1	1	13.2509	2.69409	0.41637	0.376167
chr10:50633769-50634168|MACS_peak_303	22	9	1	6	13.2509	4.04113	0.41637	2.257
chr8:142566553-142566989|MACS_peak_3257	22	10	1	3	13.2509	4.49015	0.41637	1.1285
chr19:44977336-44977827|MACS_peak_1436	22	14	1	6	13.2509	6.28621	0.41637	2.257
chr19:12738004-12738489|MACS_peak_1278	22	15	1	5	13.2509	6.73522	0.41637	1.88084
chr12:133769137-133769508|MACS_peak_572	22	6	0	2	13.2509	2.69409	0	0.752335
chr5:177388082-177388529|MACS_peak_2566	22	9	0	1	13.2509	4.04113	0	0.376167
chr14:62907953-62908360|MACS_peak_656	21	9	10	4	12.6486	4.04113	4.1637	1.50467
chr18:76609476-76609858|MACS_peak_1231	21	12	9	3	12.6486	5.38818	3.74733	1.1285
chr4:49516832-49517304|MACS_peak_2343	21	26	9	15	12.6486	11.6744	3.74733	5.64251
chr14:73850437-73850916|MACS_peak_724	21	2	7	10	12.6486	0.898029	2.91459	3.76167
chr14:50493450-50493927|MACS_peak_613	21	5	7	3	12.6486	2.24507	2.91459	1.1285
chr8:119351598-119352146|MACS_peak_3098	21	9	7	7	12.6486	4.04113	2.91459	2.63317
chr3:105121992-105122582|MACS_peak_2246	21	10	7	7	12.6486	4.49015	2.91459	2.63317
chr8:140670581-140671052|MACS_peak_3185	21	10	7	8	12.6486	4.49015	2.91459	3.00934
chr19:35654877-35655265|MACS_peak_1323	21	5	6	3	12.6486	2.24507	2.49822	1.1285
chr8:140856833-140857272|MACS_peak_3219	21	6	6	10	12.6486	2.69409	2.49822	3.76167
chr10:22819406-22819876|MACS_peak_208	21	8	6	2	12.6486	3.59212	2.49822	0.752335
chr8:140998240-140998712|MACS_peak_3235	21	8	6	7	12.6486	3.59212	2.49822	2.63317
chr2:98340672-98341016|MACS_peak_1691	21	10	6	4	12.6486	4.49015	2.49822	1.50467
chr7:5148100-5148499|MACS_peak_2840	21	10	6	15	12.6486	4.49015	2.49822	5.64251
chr9:27177369-27177742|MACS_peak_3457	21	10	6	13	12.6486	4.49015	2.49822	4.89018
chr22:28099647-28100064|MACS_peak_2078	21	11	6	10	12.6486	4.93916	2.49822	3.76167
chr10:42861875-42862247|MACS_peak_263	21	11	6	6	12.6486	4.93916	2.49822	2.257
chr7:6718155-6718612|MACS_peak_2884	21	11	6	7	12.6486	4.93916	2.49822	2.63317
chr7:1767805-1768238|MACS_peak_2741	21	13	6	3	12.6486	5.83719	2.49822	1.1285
chr17:38633792-38634215|MACS_peak_1009	21	15	6	5	12.6486	6.73522	2.49822	1.88084
chr16:3273421-3273780|MACS_peak_826	21	20	6	4	12.6486	8.98029	2.49822	1.50467
chr7:80700275-80700664|MACS_peak_3024	21	3	5	1	12.6486	1.34704	2.08185	0.376167
chr22:28925744-28926063|MACS_peak_2085	21	5	5	9	12.6486	2.24507	2.08185	3.38551
chr7:1835249-1835653|MACS_peak_2745	21	5	5	5	12.6486	2.24507	2.08185	1.88084
chr7:1973868-1974206|MACS_peak_2755	21	5	5	4	12.6486	2.24507	2.08185	1.50467
chr2:97096356-97096817|MACS_peak_1688	21	7	5	5	12.6486	3.1431	2.08185	1.88084
chr20:46735363-46735751|MACS_peak_1868	21	7	5	5	12.6486	3.1431	2.08185	1.88084
chr8:143009566-143010014|MACS_peak_3274	21	8	5	5	12.6486	3.59212	2.08185	1.88084
chr17:80930676-80931130|MACS_peak_1130	21	10	5	8	12.6486	4.49015	2.08185	3.00934
chr19:56896570-56897051|MACS_peak_1492	21	12	5	5	12.6486	5.38818	2.08185	1.88084
chr14:60893927-60894332|MACS_peak_642	21	12	5	9	12.6486	5.38818	2.08185	3.38551
chr14:69383984-69384370|MACS_peak_698	21	12	5	2	12.6486	5.38818	2.08185	0.752335
chr12:120837752-120838211|MACS_peak_539	21	12	5	4	12.6486	5.38818	2.08185	1.50467
chr1:204395848-204396303|MACS_peak_164	21	14	5	4	12.6486	6.28621	2.08185	1.50467
chr4:41186597-41186985|MACS_peak_2307	21	14	5	2	12.6486	6.28621	2.08185	0.752335
chr6:34486374-34486755|MACS_peak_2600	21	2	4	4	12.6486	0.898029	1.66548	1.50467
chr17:21318558-21318974|MACS_peak_989	21	4	4	4	12.6486	1.79606	1.66548	1.50467
chr12:1964951-1965378|MACS_peak_475	21	6	4	1	12.6486	2.69409	1.66548	0.376167
chr21:32615047-32615513|MACS_peak_1987	21	9	4	10	12.6486	4.04113	1.66548	3.76167
chr5:71747852-71748304|MACS_peak_2500	21	9	4	2	12.6486	4.04113	1.66548	0.752335
chr8:99952620-99953043|MACS_peak_3081	21	9	4	4	12.6486	4.04113	1.66548	1.50467
chr19:40538281-40538733|MACS_peak_1400	21	10	4	2	12.6486	4.49015	1.66548	0.752335
chr10:60208103-60208547|MACS_peak_309	21	10	4	4	12.6486	4.49015	1.66548	1.50467
chr9:35508675-35509082|MACS_peak_3471	21	11	4	6	12.6486	4.93916	1.66548	2.257
chr16:75055818-75056222|MACS_peak_928	21	12	4	4	12.6486	5.38818	1.66548	1.50467
chr8:145810493-145810891|MACS_peak_3382	21	12	4	6	12.6486	5.38818	1.66548	2.257
chr20:45702167-45702586|MACS_peak_1853	21	15	4	8	12.6486	6.73522	1.66548	3.00934
chr8:143017741-143018192|MACS_peak_3275	21	16	4	3	12.6486	7.18424	1.66548	1.1285
chr5:40680951-40681561|MACS_peak_2471	21	17	4	8	12.6486	7.63325	1.66548	3.00934
chr7:6713893-6714336|MACS_peak_2880	21	18	4	3	12.6486	8.08227	1.66548	1.1285
chr8:143392316-143392740|MACS_peak_3294	21	19	4	9	12.6486	8.53128	1.66548	3.38551
chr7:6713011-6713442|MACS_peak_2879	21	22	4	8	12.6486	9.87832	1.66548	3.00934
chr17:44877371-44877830|MACS_peak_1022	21	5	3	5	12.6486	2.24507	1.24911	1.88084
chr16:84070266-84070723|MACS_peak_938	21	6	3	5	12.6486	2.69409	1.24911	1.88084
chr10:71999631-72000081|MACS_peak_321	21	8	3	6	12.6486	3.59212	1.24911	2.257
chr19:38590491-38590883|MACS_peak_1394	21	9	3	4	12.6486	4.04113	1.24911	1.50467
chr11:119253289-119253803|MACS_peak_468	21	10	3	1	12.6486	4.49015	1.24911	0.376167
chr12:9506464-9506937|MACS_peak_487	21	10	3	9	12.6486	4.49015	1.24911	3.38551
chr7:55193253-55193652|MACS_peak_2955	21	10	3	4	12.6486	4.49015	1.24911	1.50467
chr19:33194582-33194920|MACS_peak_1316	21	12	3	1	12.6486	5.38818	1.24911	0.376167
chr3:31084315-31084745|MACS_peak_2207	21	12	3	7	12.6486	5.38818	1.24911	2.63317
chr8:144994377-144994779|MACS_peak_3364	21	13	3	10	12.6486	5.83719	1.24911	3.76167
chr7:1060932-1061400|MACS_peak_2724	21	17	3	5	12.6486	7.63325	1.24911	1.88084
chr7:57466087-57466563|MACS_peak_2970	21	3	2	0	12.6486	1.34704	0.832739	0
chr2:102761668-102762042|MACS_peak_1702	21	4	2	2	12.6486	1.79606	0.832739	0.752335
chr7:70542665-70543142|MACS_peak_3010	21	5	2	2	12.6486	2.24507	0.832739	0.752335
chr22:20714600-20715027|MACS_peak_2014	21	6	2	4	12.6486	2.69409	0.832739	1.50467
chr5:89073251-89073707|MACS_peak_2507	21	6	2	4	12.6486	2.69409	0.832739	1.50467
chr8:130810411-130810780|MACS_peak_3135	21	6	2	6	12.6486	2.69409	0.832739	2.257
chr19:37722997-37723452|MACS_peak_1377	21	7	2	7	12.6486	3.1431	0.832739	2.63317
chr12:3515109-3515582|MACS_peak_478	21	7	2	5	12.6486	3.1431	0.832739	1.88084
chr3:49272308-49272783|MACS_peak_2227	21	7	2	6	12.6486	3.1431	0.832739	2.257
chr2:56899833-56900399|MACS_peak_1614	21	7	2	2	12.6486	3.1431	0.832739	0.752335
chr19:58698165-58698536|MACS_peak_1513	21	8	2	4	12.6486	3.59212	0.832739	1.50467
chr5:132730106-132730604|MACS_peak_2523	21	8	2	1	12.6486	3.59212	0.832739	0.376167
chr5:172633855-172634420|MACS_peak_2565	21	10	2	4	12.6486	4.49015	0.832739	1.50467
chr4:45568967-45569366|MACS_peak_2316	21	10	2	1	12.6486	4.49015	0.832739	0.376167
chr22:33779452-33779863|MACS_peak_2096	21	12	2	3	12.6486	5.38818	0.832739	1.1285
chr3:127609918-127610273|MACS_peak_2264	21	16	2	4	12.6486	7.18424	0.832739	1.50467
chr15:83711435-83711814|MACS_peak_801	21	17	2	3	12.6486	7.63325	0.832739	1.1285
chr1:143537266-143537626|MACS_peak_144	21	26	2	10	12.6486	11.6744	0.832739	3.76167
chr7:300790-301147|MACS_peak_2696	21	4	1	1	12.6486	1.79606	0.41637	0.376167
chr5:1464059-1464512|MACS_peak_2404	21	6	1	2	12.6486	2.69409	0.41637	0.752335
chr19:46793557-46793997|MACS_peak_1448	21	8	1	3	12.6486	3.59212	0.41637	1.1285
chr2:89064336-89064805|MACS_peak_1649	21	8	1	3	12.6486	3.59212	0.41637	1.1285
chr17:70974599-70974994|MACS_peak_1082	21	10	1	10	12.6486	4.49015	0.41637	3.76167
chr9:140711658-140712121|MACS_peak_3555	21	13	1	2	12.6486	5.83719	0.41637	0.752335
chr10:44647417-44647825|MACS_peak_297	21	15	1	5	12.6486	6.73522	0.41637	1.88084
chr2:133036159-133036625|MACS_peak_1752	21	6	0	6	12.6486	2.69409	0	2.257
chr17:19557530-19557924|MACS_peak_986	21	8	0	0	12.6486	3.59212	0	0
chr10:46970099-46970534|MACS_peak_300	20	7	9	11	12.0463	3.1431	3.74733	4.13784
chr9:117047047-117047513|MACS_peak_3521	20	8	8	7	12.0463	3.59212	3.33096	2.63317
chr14:70050431-70050867|MACS_peak_700	20	9	8	9	12.0463	4.04113	3.33096	3.38551
chr2:36851990-36852535|MACS_peak_1579	20	10	8	12	12.0463	4.49015	3.33096	4.51401
chr19:44420143-44420543|MACS_peak_1424	20	11	8	6	12.0463	4.93916	3.33096	2.257
chr7:5097653-5098081|MACS_peak_2828	20	11	8	7	12.0463	4.93916	3.33096	2.63317
chr17:61059839-61060335|MACS_peak_1058	20	15	8	15	12.0463	6.73522	3.33096	5.64251
chr17:71481291-71481727|MACS_peak_1088	20	16	8	7	12.0463	7.18424	3.33096	2.63317
chr2:55155369-55155838|MACS_peak_1613	20	18	8	7	12.0463	8.08227	3.33096	2.63317
chr8:144729207-144729657|MACS_peak_3352	20	5	7	11	12.0463	2.24507	2.91459	4.13784
chr8:145829396-145829849|MACS_peak_3392	20	5	7	6	12.0463	2.24507	2.91459	2.257
chr17:63509641-63509998|MACS_peak_1062	20	7	7	4	12.0463	3.1431	2.91459	1.50467
chr9:137493019-137493377|MACS_peak_3543	20	7	7	5	12.0463	3.1431	2.91459	1.88084
chr18:13142046-13142384|MACS_peak_1184	20	8	7	5	12.0463	3.59212	2.91459	1.88084
chr16:88609433-88609875|MACS_peak_959	20	11	7	4	12.0463	4.93916	2.91459	1.50467
chr8:144151917-144152269|MACS_peak_3338	20	11	7	9	12.0463	4.93916	2.91459	3.38551
chr15:20486023-20486471|MACS_peak_739	20	14	7	3	12.0463	6.28621	2.91459	1.1285
chr14:69082276-69082685|MACS_peak_693	20	16	7	9	12.0463	7.18424	2.91459	3.38551
chr19:58764865-58765301|MACS_peak_1526	20	4	6	6	12.0463	1.79606	2.49822	2.257
chr8:143140213-143140641|MACS_peak_3279	20	5	6	5	12.0463	2.24507	2.49822	1.88084
chr19:37213191-37213564|MACS_peak_1356	20	7	6	5	12.0463	3.1431	2.49822	1.88084
chr8:141134492-141134952|MACS_peak_3243	20	9	6	2	12.0463	4.04113	2.49822	0.752335
chr12:65934525-65935047|MACS_peak_528	20	12	6	10	12.0463	5.38818	2.49822	3.76167
chr16:14607365-14607777|MACS_peak_858	20	14	6	8	12.0463	6.28621	2.49822	3.00934
chr2:133427369-133427786|MACS_peak_1755	20	0	5	4	12.0463	0	2.08185	1.50467
chr17:62368145-62368454|MACS_peak_1060	20	4	5	6	12.0463	1.79606	2.08185	2.257
chr8:142942792-142943184|MACS_peak_3266	20	4	5	2	12.0463	1.79606	2.08185	0.752335
chr8:145954012-145954462|MACS_peak_3419	20	4	5	9	12.0463	1.79606	2.08185	3.38551
chr17:63954980-63955425|MACS_peak_1064	20	5	5	4	12.0463	2.24507	2.08185	1.50467
chr18:13765454-13765837|MACS_peak_1198	20	5	5	4	12.0463	2.24507	2.08185	1.50467
chr9:28149709-28150132|MACS_peak_3461	20	6	5	0	12.0463	2.69409	2.08185	0
chr8:9304391-9304877|MACS_peak_3041	20	6	5	7	12.0463	2.69409	2.08185	2.63317
chr22:49776530-49776873|MACS_peak_2170	20	7	5	4	12.0463	3.1431	2.08185	1.50467
chr7:64385020-64385504|MACS_peak_2999	20	7	5	2	12.0463	3.1431	2.08185	0.752335
chr2:122789842-122790261|MACS_peak_1738	20	9	5	1	12.0463	4.04113	2.08185	0.376167
chr20:56294921-56295303|MACS_peak_1910	20	9	5	3	12.0463	4.04113	2.08185	1.1285
chr4:30723825-30724225|MACS_peak_2292	20	9	5	6	12.0463	4.04113	2.08185	2.257
chr11:66746329-66746691|MACS_peak_427	20	10	5	3	12.0463	4.49015	2.08185	1.1285
chr22:28479597-28480039|MACS_peak_2081	20	11	5	10	12.0463	4.93916	2.08185	3.76167
chr14:71409066-71409427|MACS_peak_705	20	12	5	5	12.0463	5.38818	2.08185	1.88084
chr2:43339411-43339784|MACS_peak_1593	20	13	5	3	12.0463	5.83719	2.08185	1.1285
chr20:57100597-57101063|MACS_peak_1921	20	17	5	10	12.0463	7.63325	2.08185	3.76167
chr1:110331188-110331560|MACS_peak_117	20	5	4	8	12.0463	2.24507	1.66548	3.00934
chr19:58596757-58597327|MACS_peak_1505	20	8	4	1	12.0463	3.59212	1.66548	0.376167
chr15:90554172-90554507|MACS_peak_807	20	9	4	2	12.0463	4.04113	1.66548	0.752335
chr19:37007342-37007682|MACS_peak_1343	20	10	4	1	12.0463	4.49015	1.66548	0.376167
chr1:247157118-247157582|MACS_peak_190	20	10	4	1	12.0463	4.49015	1.66548	0.376167
chr8:146154766-146155209|MACS_peak_3435	20	11	4	10	12.0463	4.93916	1.66548	3.76167
chr16:3358444-3358793|MACS_peak_835	20	12	4	3	12.0463	5.38818	1.66548	1.1285
chr1:247150477-247150885|MACS_peak_187	20	13	4	2	12.0463	5.83719	1.66548	0.752335
chr9:34532379-34532818|MACS_peak_3468	20	14	4	6	12.0463	6.28621	1.66548	2.257
chr8:146168922-146169271|MACS_peak_3441	20	14	4	8	12.0463	6.28621	1.66548	3.00934
chr7:4523027-4523488|MACS_peak_2811	20	17	4	9	12.0463	7.63325	1.66548	3.38551
chr5:14255871-14256288|MACS_peak_2434	20	18	4	4	12.0463	8.08227	1.66548	1.50467
chr6:39281575-39281925|MACS_peak_2615	20	2	3	1	12.0463	0.898029	1.24911	0.376167
chr19:29920767-29921200|MACS_peak_1295	20	4	3	4	12.0463	1.79606	1.24911	1.50467
chr22:50719619-50719952|MACS_peak_2183	20	6	3	0	12.0463	2.69409	1.24911	0
chr22:25608221-25608591|MACS_peak_2040	20	7	3	9	12.0463	3.1431	1.24911	3.38551
chr16:89654928-89655293|MACS_peak_969	20	7	3	6	12.0463	3.1431	1.24911	2.257
chr19:40541565-40542007|MACS_peak_1401	20	8	3	2	12.0463	3.59212	1.24911	0.752335
chr4:97663638-97664078|MACS_peak_2382	20	10	3	2	12.0463	4.49015	1.24911	0.752335
chr2:73765540-73765971|MACS_peak_1634	20	12	3	8	12.0463	5.38818	1.24911	3.00934
chr7:296444-296898|MACS_peak_2691	20	14	3	7	12.0463	6.28621	1.24911	2.63317
chr16:75199173-75199625|MACS_peak_929	20	15	3	8	12.0463	6.73522	1.24911	3.00934
chr22:35829395-35829844|MACS_peak_2113	20	18	3	2	12.0463	8.08227	1.24911	0.752335
chr20:51096127-51096586|MACS_peak_1897	20	18	3	8	12.0463	8.08227	1.24911	3.00934
chr19:53087978-53088362|MACS_peak_1482	20	2	2	2	12.0463	0.898029	0.832739	0.752335
chr11:115504571-115504972|MACS_peak_464	20	4	2	1	12.0463	1.79606	0.832739	0.376167
chr3:75719436-75719739|MACS_peak_2235	20	5	2	2	12.0463	2.24507	0.832739	0.752335
chr2:33141246-33141682|MACS_peak_1574	20	5	2	3	12.0463	2.24507	0.832739	1.1285
chr8:140556223-140556675|MACS_peak_3180	20	5	2	4	12.0463	2.24507	0.832739	1.50467
chr17:80757991-80758349|MACS_peak_1129	20	6	2	2	12.0463	2.69409	0.832739	0.752335
chr10:44488072-44488526|MACS_peak_296	20	6	2	3	12.0463	2.69409	0.832739	1.1285
chr8:140937127-140937472|MACS_peak_3230	20	7	2	3	12.0463	3.1431	0.832739	1.1285
chr8:142878561-142878912|MACS_peak_3263	20	8	2	4	12.0463	3.59212	0.832739	1.50467
chr1:18081649-18082053|MACS_peak_19	20	9	2	6	12.0463	4.04113	0.832739	2.257
chr2:133011001-133011332|MACS_peak_1750	20	11	2	1	12.0463	4.93916	0.832739	0.376167
chr7:62504541-62504948|MACS_peak_2979	20	12	2	3	12.0463	5.38818	0.832739	1.1285
chr5:649782-650188|MACS_peak_2394	20	12	2	3	12.0463	5.38818	0.832739	1.1285
chr5:14254452-14254828|MACS_peak_2433	20	13	2	3	12.0463	5.83719	0.832739	1.1285
chr22:49694187-49694617|MACS_peak_2168	20	2	1	4	12.0463	0.898029	0.41637	1.50467
chr8:140926428-140926784|MACS_peak_3228	20	4	1	4	12.0463	1.79606	0.41637	1.50467
chr7:6711041-6711452|MACS_peak_2878	20	8	1	1	12.0463	3.59212	0.41637	0.376167
chr19:45130346-45130775|MACS_peak_1447	20	11	1	6	12.0463	4.93916	0.41637	2.257
chr16:285717-286054|MACS_peak_813	20	13	1	3	12.0463	5.83719	0.41637	1.1285
chr8:131840400-131840833|MACS_peak_3138	20	13	1	9	12.0463	5.83719	0.41637	3.38551
chr12:124809421-124809782|MACS_peak_543	20	18	1	0	12.0463	8.08227	0.41637	0
chr8:52183775-52184223|MACS_peak_3054	20	4	0	2	12.0463	1.79606	0	0.752335
chr21:44963043-44963412|MACS_peak_2000	20	6	0	3	12.0463	2.69409	0	1.1285
chr2:39586995-39587433|MACS_peak_1586	19	9	9	7	11.444	4.04113	3.74733	2.63317
chr7:4163489-4163892|MACS_peak_2795	19	9	9	6	11.444	4.04113	3.74733	2.257
chr17:75130843-75131248|MACS_peak_1098	19	10	9	6	11.444	4.49015	3.74733	2.257
chr8:143391683-143392124|MACS_peak_3293	19	11	9	5	11.444	4.93916	3.74733	1.88084
chr22:25323441-25323816|MACS_peak_2035	19	13	9	7	11.444	5.83719	3.74733	2.63317
chr2:90480080-90480449|MACS_peak_1665	19	6	8	3	11.444	2.69409	3.33096	1.1285
chr15:66706303-66706655|MACS_peak_781	19	7	8	7	11.444	3.1431	3.33096	2.63317
chr16:46421747-46421894|MACS_peak_896	19	10	8	6	11.444	4.49015	3.33096	2.257
chr17:60258706-60259135|MACS_peak_1053	19	12	8	5	11.444	5.38818	3.33096	1.88084
chr7:2983582-2984025|MACS_peak_2784	19	4	7	6	11.444	1.79606	2.91459	2.257
chr21:32751297-32751730|MACS_peak_1989	19	6	7	6	11.444	2.69409	2.91459	2.257
chr1:244378700-244379106|MACS_peak_183	19	6	7	6	11.444	2.69409	2.91459	2.257
chr13:114430021-114430484|MACS_peak_596	19	7	7	5	11.444	3.1431	2.91459	1.88084
chr14:62423093-62423551|MACS_peak_653	19	7	7	4	11.444	3.1431	2.91459	1.50467
chr7:2068873-2069239|MACS_peak_2765	19	7	7	8	11.444	3.1431	2.91459	3.00934
chr7:63536635-63537059|MACS_peak_2990	19	7	7	3	11.444	3.1431	2.91459	1.1285
chr4:49111489-49111790|MACS_peak_2322	19	10	7	4	11.444	4.49015	2.91459	1.50467
chr7:915542-915997|MACS_peak_2722	19	11	7	4	11.444	4.93916	2.91459	1.50467
chr17:71569900-71570337|MACS_peak_1091	19	15	7	3	11.444	6.73522	2.91459	1.1285
chr16:8428966-8429391|MACS_peak_848	19	22	7	4	11.444	9.87832	2.91459	1.50467
chr7:5544595-5544913|MACS_peak_2857	19	4	6	5	11.444	1.79606	2.49822	1.88084
chr18:9866572-9866949|MACS_peak_1165	19	8	6	7	11.444	3.59212	2.49822	2.63317
chr14:55571196-55571576|MACS_peak_624	19	9	6	1	11.444	4.04113	2.49822	0.376167
chr6:52827399-52827878|MACS_peak_2632	19	9	6	4	11.444	4.04113	2.49822	1.50467
chr22:35184853-35185297|MACS_peak_2098	19	10	6	6	11.444	4.49015	2.49822	2.257
chr2:36701551-36701969|MACS_peak_1577	19	10	6	2	11.444	4.49015	2.49822	0.752335
chr18:14101445-14101886|MACS_peak_1202	19	13	6	4	11.444	5.83719	2.49822	1.50467
chr10:127577227-127577626|MACS_peak_376	19	15	6	14	11.444	6.73522	2.49822	5.26634
chr9:69817252-69817578|MACS_peak_3496	19	16	6	7	11.444	7.18424	2.49822	2.63317
chr8:146206778-146207224|MACS_peak_3450	19	17	6	14	11.444	7.63325	2.49822	5.26634
chr17:79156785-79157151|MACS_peak_1114	19	4	5	1	11.444	1.79606	2.08185	0.376167
chr7:99669900-99670321|MACS_peak_3032	19	4	5	6	11.444	1.79606	2.08185	2.257
chr22:25744251-25744662|MACS_peak_2044	19	6	5	6	11.444	2.69409	2.08185	2.257
chr10:42882800-42883220|MACS_peak_264	19	6	5	5	11.444	2.69409	2.08185	1.88084
chr7:5467283-5467690|MACS_peak_2850	19	6	5	10	11.444	2.69409	2.08185	3.76167
chr18:13677279-13677673|MACS_peak_1197	19	7	5	4	11.444	3.1431	2.08185	1.50467
chr14:64184075-64184390|MACS_peak_662	19	8	5	6	11.444	3.59212	2.08185	2.257
chr10:74740648-74741210|MACS_peak_325	19	10	5	5	11.444	4.49015	2.08185	1.88084
chr14:61424533-61424933|MACS_peak_644	19	11	5	7	11.444	4.93916	2.08185	2.63317
chr20:46926789-46927158|MACS_peak_1869	19	12	5	7	11.444	5.38818	2.08185	2.63317
chr21:11181498-11181894|MACS_peak_1974	19	15	5	10	11.444	6.73522	2.08185	3.76167
chr8:145780305-145780745|MACS_peak_3375	19	15	5	5	11.444	6.73522	2.08185	1.88084
chr8:144017105-144017559|MACS_peak_3334	19	17	5	13	11.444	7.63325	2.08185	4.89018
chr16:46432997-46433165|MACS_peak_902	19	18	5	7	11.444	8.08227	2.08185	2.63317
chr12:34361535-34361827|MACS_peak_512	19	2	4	0	11.444	0.898029	1.66548	0
chr1:247294867-247295313|MACS_peak_193	19	4	4	2	11.444	1.79606	1.66548	0.752335
chr22:23418552-23418987|MACS_peak_2023	19	5	4	4	11.444	2.24507	1.66548	1.50467
chr8:143356212-143356640|MACS_peak_3287	19	5	4	3	11.444	2.24507	1.66548	1.1285
chr3:15467406-15467693|MACS_peak_2199	19	6	4	5	11.444	2.69409	1.66548	1.88084
chr20:60683080-60683478|MACS_peak_1941	19	6	4	6	11.444	2.69409	1.66548	2.257
chr1:110520738-110521125|MACS_peak_122	19	6	4	3	11.444	2.69409	1.66548	1.1285
chr8:145932782-145933074|MACS_peak_3410	19	6	4	5	11.444	2.69409	1.66548	1.88084
chr22:23788913-23789289|MACS_peak_2024	19	7	4	3	11.444	3.1431	1.66548	1.1285
chr22:35641537-35641871|MACS_peak_2109	19	7	4	1	11.444	3.1431	1.66548	0.376167
chr2:27816994-27817353|MACS_peak_1563	19	7	4	2	11.444	3.1431	1.66548	0.752335
chr21:35496992-35497358|MACS_peak_1996	19	8	4	3	11.444	3.59212	1.66548	1.1285
chr1:1426068-1426491|MACS_peak_1	19	8	4	2	11.444	3.59212	1.66548	0.752335
chr8:141200788-141201257|MACS_peak_3245	19	9	4	6	11.444	4.04113	1.66548	2.257
chr20:29857599-29858003|MACS_peak_1819	19	10	4	3	11.444	4.49015	1.66548	1.1285
chr4:95246525-95246910|MACS_peak_2381	19	10	4	4	11.444	4.49015	1.66548	1.50467
chr3:16206003-16206387|MACS_peak_2201	19	11	4	6	11.444	4.93916	1.66548	2.257
chr2:25117911-25118265|MACS_peak_1557	19	11	4	4	11.444	4.93916	1.66548	1.50467
chr2:39748774-39749176|MACS_peak_1587	19	11	4	7	11.444	4.93916	1.66548	2.63317
chr8:142558970-142559441|MACS_peak_3254	19	12	4	2	11.444	5.38818	1.66548	0.752335
chr8:140744959-140745345|MACS_peak_3194	19	13	4	4	11.444	5.83719	1.66548	1.50467
chr8:143401284-143401636|MACS_peak_3300	19	3	3	3	11.444	1.34704	1.24911	1.1285
chr18:74951377-74951854|MACS_peak_1225	19	4	3	1	11.444	1.79606	1.24911	0.376167
chr1:152191143-152191521|MACS_peak_152	19	4	3	1	11.444	1.79606	1.24911	0.376167
chr19:37287270-37287625|MACS_peak_1364	19	8	3	2	11.444	3.59212	1.24911	0.752335
chr2:99438690-99439144|MACS_peak_1692	19	8	3	2	11.444	3.59212	1.24911	0.752335
chr8:136702609-136703012|MACS_peak_3167	19	8	3	2	11.444	3.59212	1.24911	0.752335
chr15:69221192-69221559|MACS_peak_789	19	9	3	4	11.444	4.04113	1.24911	1.50467
chr2:129225832-129226235|MACS_peak_1744	19	9	3	5	11.444	4.04113	1.24911	1.88084
chr6:134358421-134358737|MACS_peak_2663	19	10	3	1	11.444	4.49015	1.24911	0.376167
chr22:28788764-28789228|MACS_peak_2083	19	12	3	13	11.444	5.38818	1.24911	4.89018
chr22:45966529-45966962|MACS_peak_2143	19	12	3	2	11.444	5.38818	1.24911	0.752335
chr9:37564034-37564380|MACS_peak_3477	19	12	3	2	11.444	5.38818	1.24911	0.752335
chr15:89609741-89610078|MACS_peak_803	19	13	3	6	11.444	5.83719	1.24911	2.257
chr4:38999757-39000116|MACS_peak_2302	19	4	2	3	11.444	1.79606	0.832739	1.1285
chr10:42860758-42861197|MACS_peak_262	19	5	2	4	11.444	2.24507	0.832739	1.50467
chr2:240110254-240110641|MACS_peak_1797	19	6	2	2	11.444	2.69409	0.832739	0.752335
chr6:170777091-170777440|MACS_peak_2685	19	6	2	2	11.444	2.69409	0.832739	0.752335
chr1:45571717-45572079|MACS_peak_83	19	7	2	5	11.444	3.1431	0.832739	1.88084
chr8:144052950-144053331|MACS_peak_3335	19	7	2	5	11.444	3.1431	0.832739	1.88084
chr21:35539033-35539427|MACS_peak_1997	19	8	2	2	11.444	3.59212	0.832739	0.752335
chr1:1886178-1886524|MACS_peak_2	19	8	2	1	11.444	3.59212	0.832739	0.376167
chr9:140728592-140728942|MACS_peak_3557	19	8	2	0	11.444	3.59212	0.832739	0
chr8:143396088-143396409|MACS_peak_3296	19	8	2	2	11.444	3.59212	0.832739	0.752335
chr4:49216530-49216974|MACS_peak_2334	19	9	2	7	11.444	4.04113	0.832739	2.63317
chr18:77333398-77333778|MACS_peak_1235	19	10	2	7	11.444	4.49015	0.832739	2.63317
chr8:135708882-135709292|MACS_peak_3158	19	10	2	7	11.444	4.49015	0.832739	2.63317
chr17:80700750-80701157|MACS_peak_1127	19	11	2	5	11.444	4.93916	0.832739	1.88084
chr2:202295109-202295454|MACS_peak_1773	19	11	2	1	11.444	4.93916	0.832739	0.376167
chr16:89972814-89973215|MACS_peak_971	19	12	2	3	11.444	5.38818	0.832739	1.1285
chr16:3366720-3367157|MACS_peak_840	19	14	2	7	11.444	6.28621	0.832739	2.63317
chr19:36972042-36972371|MACS_peak_1341	19	3	1	2	11.444	1.34704	0.41637	0.752335
chr5:29296759-29297197|MACS_peak_2449	19	4	1	3	11.444	1.79606	0.41637	1.1285
chr19:44371122-44371508|MACS_peak_1418	19	5	1	4	11.444	2.24507	0.41637	1.50467
chr1:152080071-152080427|MACS_peak_150	19	6	1	4	11.444	2.69409	0.41637	1.50467
chr7:51014429-51014861|MACS_peak_2950	19	6	1	5	11.444	2.69409	0.41637	1.88084
chr6:64740880-64741311|MACS_peak_2644	19	6	1	6	11.444	2.69409	0.41637	2.257
chr15:67539235-67539636|MACS_peak_784	19	7	1	5	11.444	3.1431	0.41637	1.88084
chr16:11587309-11587723|MACS_peak_855	19	7	1	4	11.444	3.1431	0.41637	1.50467
chr10:76103250-76103735|MACS_peak_329	19	8	1	7	11.444	3.59212	0.41637	2.63317
chr8:140805553-140805982|MACS_peak_3210	19	8	1	6	11.444	3.59212	0.41637	2.257
chr19:9672987-9673331|MACS_peak_1269	19	10	1	2	11.444	4.49015	0.41637	0.752335
chr10:134491908-134492216|MACS_peak_383	19	10	1	3	11.444	4.49015	0.41637	1.1285
chr16:85662489-85662881|MACS_peak_946	19	12	1	1	11.444	5.38818	0.41637	0.376167
chr19:37881056-37881486|MACS_peak_1382	19	14	1	7	11.444	6.28621	0.41637	2.63317
chr16:89064512-89064848|MACS_peak_961	19	14	1	3	11.444	6.28621	0.41637	1.1285
chr19:37207725-37208081|MACS_peak_1354	19	18	1	2	11.444	8.08227	0.41637	0.752335
chr7:62059965-62060367|MACS_peak_2976	19	3	0	1	11.444	1.34704	0	0.376167
chr7:1974987-1975389|MACS_peak_2756	19	8	0	4	11.444	3.59212	0	1.50467
chr18:1056454-1056839|MACS_peak_1143	18	6	8	11	10.8416	2.69409	3.33096	4.13784
chr17:80653897-80654322|MACS_peak_1120	18	9	8	4	10.8416	4.04113	3.33096	1.50467
chr22:35869356-35869762|MACS_peak_2115	18	6	7	5	10.8416	2.69409	2.91459	1.88084
chr20:57446785-57447131|MACS_peak_1927	18	7	7	3	10.8416	3.1431	2.91459	1.1285
chr14:64184549-64184896|MACS_peak_663	18	8	7	7	10.8416	3.59212	2.91459	2.63317
chr19:44344368-44344693|MACS_peak_1409	18	9	7	8	10.8416	4.04113	2.91459	3.00934
chr11:114458078-114458457|MACS_peak_463	18	9	7	4	10.8416	4.04113	2.91459	1.50467
chr16:71482964-71483341|MACS_peak_919	18	10	7	8	10.8416	4.49015	2.91459	3.00934
chr2:89112230-89112667|MACS_peak_1650	18	10	7	4	10.8416	4.49015	2.91459	1.50467
chr22:19325069-19325512|MACS_peak_2005	18	11	7	4	10.8416	4.93916	2.91459	1.50467
chr8:135478420-135478829|MACS_peak_3155	18	11	7	4	10.8416	4.93916	2.91459	1.50467
chr7:3122182-3122624|MACS_peak_2786	18	13	7	13	10.8416	5.83719	2.91459	4.89018
chr2:235156460-235156856|MACS_peak_1784	18	5	6	3	10.8416	2.24507	2.49822	1.1285
chr9:66455691-66456086|MACS_peak_3488	18	6	6	3	10.8416	2.69409	2.49822	1.1285
chr6:42679333-42679773|MACS_peak_2623	18	7	6	4	10.8416	3.1431	2.49822	1.50467
chr17:71449543-71449912|MACS_peak_1086	18	8	6	10	10.8416	3.59212	2.49822	3.76167
chr2:65717692-65718049|MACS_peak_1625	18	9	6	8	10.8416	4.04113	2.49822	3.00934
chr20:42791704-42792067|MACS_peak_1840	18	9	6	7	10.8416	4.04113	2.49822	2.63317
chr19:36721360-36721779|MACS_peak_1327	18	11	6	3	10.8416	4.93916	2.49822	1.1285
chr22:45399195-45399518|MACS_peak_2142	18	11	6	1	10.8416	4.93916	2.49822	0.376167
chr15:69150026-69150403|MACS_peak_788	18	11	6	7	10.8416	4.93916	2.49822	2.63317
chr10:42831534-42832002|MACS_peak_258	18	11	6	9	10.8416	4.93916	2.49822	3.38551
chr22:22305323-22305726|MACS_peak_2019	18	15	6	10	10.8416	6.73522	2.49822	3.76167
chr16:68597967-68598333|MACS_peak_912	18	5	5	3	10.8416	2.24507	2.08185	1.1285
chr14:77210190-77210564|MACS_peak_729	18	5	5	5	10.8416	2.24507	2.08185	1.88084
chr11:81697888-81698291|MACS_peak_449	18	7	5	2	10.8416	3.1431	2.08185	0.752335
chr20:57053312-57053787|MACS_peak_1918	18	9	5	6	10.8416	4.04113	2.08185	2.257
chr7:30495209-30495546|MACS_peak_2909	18	10	5	5	10.8416	4.49015	2.08185	1.88084
chr19:28668451-28668828|MACS_peak_1287	18	11	5	6	10.8416	4.93916	2.08185	2.257
chr17:58565091-58565481|MACS_peak_1034	18	11	5	5	10.8416	4.93916	2.08185	1.88084
chr7:399286-399638|MACS_peak_2705	18	12	5	3	10.8416	5.38818	2.08185	1.1285
chr21:32616627-32617087|MACS_peak_1988	18	19	5	7	10.8416	8.53128	2.08185	2.63317
chr4:41690600-41690962|MACS_peak_2310	18	23	5	5	10.8416	10.3273	2.08185	1.88084
chr1:45750354-45750664|MACS_peak_85	18	2	4	0	10.8416	0.898029	1.66548	0
chr7:57312922-57313264|MACS_peak_2969	18	2	4	2	10.8416	0.898029	1.66548	0.752335
chr19:58747454-58747780|MACS_peak_1521	18	3	4	2	10.8416	1.34704	1.66548	0.752335
chr7:4696732-4697090|MACS_peak_2815	18	4	4	3	10.8416	1.79606	1.66548	1.1285
chr1:2586116-2586498|MACS_peak_5	18	5	4	2	10.8416	2.24507	1.66548	0.752335
chr8:140741794-140742192|MACS_peak_3190	18	5	4	3	10.8416	2.24507	1.66548	1.1285
chr1:247353733-247354165|MACS_peak_195	18	6	4	8	10.8416	2.69409	1.66548	3.00934
chr5:41831680-41831958|MACS_peak_2474	18	6	4	0	10.8416	2.69409	1.66548	0
chr15:22461635-22462039|MACS_peak_751	18	7	4	2	10.8416	3.1431	1.66548	0.752335
chr14:73235893-73236306|MACS_peak_719	18	7	4	4	10.8416	3.1431	1.66548	1.50467
chr19:44355680-44356033|MACS_peak_1413	18	8	4	8	10.8416	3.59212	1.66548	3.00934
chr15:27753830-27754194|MACS_peak_759	18	8	4	6	10.8416	3.59212	1.66548	2.257
chr1:41869144-41869565|MACS_peak_67	18	8	4	4	10.8416	3.59212	1.66548	1.50467
chr8:145785462-145785771|MACS_peak_3376	18	8	4	3	10.8416	3.59212	1.66548	1.1285
chr1:63227073-63227410|MACS_peak_99	18	9	4	3	10.8416	4.04113	1.66548	1.1285
chr16:3360122-3360460|MACS_peak_838	18	10	4	4	10.8416	4.49015	1.66548	1.50467
chr22:25741042-25741425|MACS_peak_2042	18	11	4	5	10.8416	4.93916	1.66548	1.88084
chr8:143405017-143405461|MACS_peak_3301	18	11	4	7	10.8416	4.93916	1.66548	2.63317
chr14:66673347-66673756|MACS_peak_676	18	12	4	7	10.8416	5.38818	1.66548	2.63317
chr2:28527556-28527920|MACS_peak_1567	18	12	4	11	10.8416	5.38818	1.66548	4.13784
chr19:38128187-38128570|MACS_peak_1389	18	13	4	2	10.8416	5.83719	1.66548	0.752335
chr3:127496334-127496780|MACS_peak_2263	18	13	4	2	10.8416	5.83719	1.66548	0.752335
chr8:141055224-141055599|MACS_peak_3240	18	14	4	4	10.8416	6.28621	1.66548	1.50467
chr19:44379992-44380349|MACS_peak_1420	18	15	4	4	10.8416	6.73522	1.66548	1.50467
chr1:23688958-23689314|MACS_peak_28	18	15	4	7	10.8416	6.73522	1.66548	2.63317
chr1:109327656-109327994|MACS_peak_113	18	16	4	2	10.8416	7.18424	1.66548	0.752335
chr9:138808070-138808457|MACS_peak_3548	18	16	4	2	10.8416	7.18424	1.66548	0.752335
chr11:66746839-66747192|MACS_peak_428	18	3	3	11	10.8416	1.34704	1.24911	4.13784
chr7:294048-294437|MACS_peak_2689	18	3	3	2	10.8416	1.34704	1.24911	0.752335
chr5:38851468-38851787|MACS_peak_2469	18	3	3	5	10.8416	1.34704	1.24911	1.88084
chr8:81857953-81858272|MACS_peak_3064	18	3	3	1	10.8416	1.34704	1.24911	0.376167
chr2:39813285-39813615|MACS_peak_1588	18	4	3	2	10.8416	1.79606	1.24911	0.752335
chr10:54106568-54106962|MACS_peak_305	18	4	3	5	10.8416	1.79606	1.24911	1.88084
chr16:11302007-11302382|MACS_peak_854	18	5	3	10	10.8416	2.24507	1.24911	3.76167
chr16:50707407-50707723|MACS_peak_907	18	5	3	0	10.8416	2.24507	1.24911	0
chr20:60676442-60676787|MACS_peak_1939	18	6	3	6	10.8416	2.69409	1.24911	2.257
chr7:108197126-108197571|MACS_peak_3034	18	6	3	2	10.8416	2.69409	1.24911	0.752335
chr8:140673684-140674083|MACS_peak_3186	18	6	3	7	10.8416	2.69409	1.24911	2.63317
chr8:143410760-143411103|MACS_peak_3304	18	6	3	4	10.8416	2.69409	1.24911	1.50467
chr8:144995672-144996080|MACS_peak_3365	18	6	3	4	10.8416	2.69409	1.24911	1.50467
chr15:70113753-70114067|MACS_peak_795	18	7	3	3	10.8416	3.1431	1.24911	1.1285
chr14:71726079-71726497|MACS_peak_709	18	8	3	8	10.8416	3.59212	1.24911	3.00934
chr2:242844751-242845177|MACS_peak_1805	18	8	3	3	10.8416	3.59212	1.24911	1.1285
chr9:44070664-44070820|MACS_peak_3484	18	8	3	5	10.8416	3.59212	1.24911	1.88084
chr22:47151650-47152033|MACS_peak_2147	18	9	3	7	10.8416	4.04113	1.24911	2.63317
chr15:42544184-42544642|MACS_peak_766	18	9	3	4	10.8416	4.04113	1.24911	1.50467
chr14:71545490-71545806|MACS_peak_707	18	9	3	1	10.8416	4.04113	1.24911	0.376167
chr2:155958402-155958852|MACS_peak_1761	18	9	3	3	10.8416	4.04113	1.24911	1.1285
chr4:67578191-67578556|MACS_peak_2362	18	9	3	3	10.8416	4.04113	1.24911	1.1285
chr9:99036427-99036846|MACS_peak_3508	18	9	3	2	10.8416	4.04113	1.24911	0.752335
chr8:118438791-118439099|MACS_peak_3095	18	9	3	2	10.8416	4.04113	1.24911	0.752335
chr3:45132454-45132842|MACS_peak_2222	18	10	3	2	10.8416	4.49015	1.24911	0.752335
chr7:2071221-2071587|MACS_peak_2769	18	10	3	5	10.8416	4.49015	1.24911	1.88084
chr19:53306239-53306637|MACS_peak_1485	18	12	3	3	10.8416	5.38818	1.24911	1.1285
chr10:93363372-93363727|MACS_peak_353	18	14	3	3	10.8416	6.28621	1.24911	1.1285
chr3:33745822-33746180|MACS_peak_2209	18	2	2	7	10.8416	0.898029	0.832739	2.63317
chr1:45804412-45804774|MACS_peak_87	18	3	2	10	10.8416	1.34704	0.832739	3.76167
chr2:114736909-114737275|MACS_peak_1722	18	4	2	2	10.8416	1.79606	0.832739	0.752335
chr4:88784911-88785223|MACS_peak_2375	18	5	2	1	10.8416	2.24507	0.832739	0.376167
chr2:112797187-112797540|MACS_peak_1714	18	6	2	2	10.8416	2.69409	0.832739	0.752335
chr19:37807366-37807725|MACS_peak_1379	18	7	2	0	10.8416	3.1431	0.832739	0
chr18:74274892-74275270|MACS_peak_1224	18	7	2	3	10.8416	3.1431	0.832739	1.1285
chr5:9731276-9731714|MACS_peak_2425	18	7	2	3	10.8416	3.1431	0.832739	1.1285
chr1:68308586-68308966|MACS_peak_100	18	8	2	1	10.8416	3.59212	0.832739	0.376167
chr1:154474990-154475406|MACS_peak_154	18	8	2	1	10.8416	3.59212	0.832739	0.376167
chr17:66391356-66391642|MACS_peak_1067	18	9	2	3	10.8416	4.04113	0.832739	1.1285
chr7:63790579-63790904|MACS_peak_2994	18	9	2	1	10.8416	4.04113	0.832739	0.376167
chr4:54698623-54698981|MACS_peak_2350	18	9	2	2	10.8416	4.04113	0.832739	0.752335
chr8:140849516-140849852|MACS_peak_3217	18	9	2	3	10.8416	4.04113	0.832739	1.1285
chr19:37260958-37261341|MACS_peak_1362	18	10	2	1	10.8416	4.49015	0.832739	0.376167
chr2:218942219-218942631|MACS_peak_1781	18	10	2	4	10.8416	4.49015	0.832739	1.50467
chr20:33664570-33664953|MACS_peak_1830	18	10	2	2	10.8416	4.49015	0.832739	0.752335
chr7:4698299-4698645|MACS_peak_2817	18	10	2	4	10.8416	4.49015	0.832739	1.50467
chr8:145901195-145901644|MACS_peak_3404	18	10	2	4	10.8416	4.49015	0.832739	1.50467
chr15:85164601-85164959|MACS_peak_802	18	11	2	1	10.8416	4.93916	0.832739	0.376167
chr19:40549223-40549679|MACS_peak_1403	18	12	2	5	10.8416	5.38818	0.832739	1.88084
chr6:37564373-37564789|MACS_peak_2609	18	14	2	4	10.8416	6.28621	0.832739	1.50467
chr16:3432598-3432901|MACS_peak_843	18	16	2	5	10.8416	7.18424	0.832739	1.88084
chr19:44981340-44981727|MACS_peak_1437	18	18	2	6	10.8416	8.08227	0.832739	2.257
chr1:115902625-115902926|MACS_peak_131	18	3	1	0	10.8416	1.34704	0.41637	0
chr17:81002420-81002800|MACS_peak_1133	18	5	1	7	10.8416	2.24507	0.41637	2.63317
chr18:76252853-76253197|MACS_peak_1226	18	5	1	5	10.8416	2.24507	0.41637	1.88084
chr19:12736836-12737164|MACS_peak_1277	18	6	1	4	10.8416	2.69409	0.41637	1.50467
chr7:38089260-38089598|MACS_peak_2924	18	6	1	6	10.8416	2.69409	0.41637	2.257
chr5:178314611-178314974|MACS_peak_2570	18	6	1	3	10.8416	2.69409	0.41637	1.1285
chr8:144173518-144173807|MACS_peak_3339	18	6	1	2	10.8416	2.69409	0.41637	0.752335
chr17:26582727-26583084|MACS_peak_997	18	7	1	1	10.8416	3.1431	0.41637	0.376167
chr7:63987620-63988022|MACS_peak_2995	18	7	1	3	10.8416	3.1431	0.41637	1.1285
chr15:70114588-70115015|MACS_peak_796	18	9	1	6	10.8416	4.04113	0.41637	2.257
chr19:58748651-58748988|MACS_peak_1522	18	10	1	4	10.8416	4.49015	0.41637	1.50467
chr8:80032142-80032455|MACS_peak_3061	18	10	1	3	10.8416	4.49015	0.41637	1.1285
chr14:67198687-67199103|MACS_peak_681	18	11	1	6	10.8416	4.93916	0.41637	2.257
chr2:238400456-238400849|MACS_peak_1793	18	11	1	4	10.8416	4.93916	0.41637	1.50467
chr19:57037751-57038104|MACS_peak_1493	18	13	1	1	10.8416	5.83719	0.41637	0.376167
chr8:23216481-23216851|MACS_peak_3045	18	13	1	2	10.8416	5.83719	0.41637	0.752335
chr2:51378659-51379043|MACS_peak_1607	18	14	1	3	10.8416	6.28621	0.41637	1.1285
chr16:23546053-23546401|MACS_peak_860	18	3	0	3	10.8416	1.34704	0	1.1285
chr11:7110456-7110821|MACS_peak_398	18	3	0	3	10.8416	1.34704	0	1.1285
chr19:44999865-45000264|MACS_peak_1443	18	4	0	2	10.8416	1.79606	0	0.752335
chr17:57000721-57001095|MACS_peak_1030	18	5	0	3	10.8416	2.24507	0	1.1285
chr2:98106753-98106999|MACS_peak_1690	18	5	0	1	10.8416	2.24507	0	0.376167
chr5:147435605-147436018|MACS_peak_2537	18	7	0	2	10.8416	3.1431	0	0.752335
chr7:34934843-34935147|MACS_peak_2914	18	12	0	4	10.8416	5.38818	0	1.50467
chr2:147546019-147546383|MACS_peak_1759	18	14	0	3	10.8416	6.28621	0	1.1285
chr19:28266813-28267243|MACS_peak_1285	17	9	8	5	10.2393	4.04113	3.33096	1.88084
chr17:34441557-34441953|MACS_peak_1000	17	10	8	9	10.2393	4.49015	3.33096	3.38551
chr8:12412270-12412680|MACS_peak_3042	17	11	8	4	10.2393	4.93916	3.33096	1.50467
chr18:13198692-13198994|MACS_peak_1186	17	13	8	6	10.2393	5.83719	3.33096	2.257
chr6:150285027-150285427|MACS_peak_2670	17	4	7	2	10.2393	1.79606	2.91459	0.752335
chr15:70547876-70548174|MACS_peak_799	17	5	7	4	10.2393	2.24507	2.91459	1.50467
chr20:29834404-29834812|MACS_peak_1818	17	5	7	3	10.2393	2.24507	2.91459	1.1285
chr1:41242063-41242469|MACS_peak_63	17	5	7	2	10.2393	2.24507	2.91459	0.752335
chr1:40917451-40917846|MACS_peak_49	17	6	7	9	10.2393	2.69409	2.91459	3.38551
chr8:140621614-140621983|MACS_peak_3181	17	6	7	8	10.2393	2.69409	2.91459	3.00934
chr7:46506753-46507137|MACS_peak_2944	17	12	7	6	10.2393	5.38818	2.91459	2.257
chr17:78460782-78461117|MACS_peak_1111	17	3	6	2	10.2393	1.34704	2.49822	0.752335
chr7:6678234-6678567|MACS_peak_2867	17	3	6	6	10.2393	1.34704	2.49822	2.257
chr20:45130925-45131280|MACS_peak_1846	17	5	6	4	10.2393	2.24507	2.49822	1.50467
chr22:24272672-24272969|MACS_peak_2029	17	6	6	6	10.2393	2.69409	2.49822	2.257
chr10:44393300-44393713|MACS_peak_292	17	7	6	8	10.2393	3.1431	2.49822	3.00934
chr7:1767382-1767790|MACS_peak_2740	17	7	6	3	10.2393	3.1431	2.49822	1.1285
chr7:4219380-4219754|MACS_peak_2796	17	7	6	3	10.2393	3.1431	2.49822	1.1285
chr7:6702751-6703081|MACS_peak_2875	17	9	6	4	10.2393	4.04113	2.49822	1.50467
chr6:159154224-159154564|MACS_peak_2673	17	9	6	5	10.2393	4.04113	2.49822	1.88084
chr19:36942647-36943034|MACS_peak_1336	17	11	6	3	10.2393	4.93916	2.49822	1.1285
chr20:42777727-42778114|MACS_peak_1838	17	3	5	2	10.2393	1.34704	2.08185	0.752335
chr10:97411619-97411991|MACS_peak_358	17	3	5	3	10.2393	1.34704	2.08185	1.1285
chr14:63541943-63542266|MACS_peak_659	17	4	5	4	10.2393	1.79606	2.08185	1.50467
chr11:64785135-64785505|MACS_peak_424	17	4	5	5	10.2393	1.79606	2.08185	1.88084
chr7:3287627-3287988|MACS_peak_2788	17	5	5	6	10.2393	2.24507	2.08185	2.257
chr2:11557546-11557924|MACS_peak_1542	17	7	5	3	10.2393	3.1431	2.08185	1.1285
chr20:45739315-45739686|MACS_peak_1855	17	7	5	5	10.2393	3.1431	2.08185	1.88084
chr7:1910901-1911255|MACS_peak_2750	17	7	5	2	10.2393	3.1431	2.08185	0.752335
chr7:36567295-36567665|MACS_peak_2923	17	7	5	6	10.2393	3.1431	2.08185	2.257
chr14:76730264-76730736|MACS_peak_728	17	8	5	1	10.2393	3.59212	2.08185	0.376167
chr11:69163308-69163631|MACS_peak_430	17	8	5	5	10.2393	3.59212	2.08185	1.88084
chr8:140941905-140942244|MACS_peak_3232	17	8	5	2	10.2393	3.59212	2.08185	0.752335
chr22:28558777-28559203|MACS_peak_2082	17	10	5	14	10.2393	4.49015	2.08185	5.26634
chr10:71060693-71060986|MACS_peak_319	17	10	5	2	10.2393	4.49015	2.08185	0.752335
chr19:47633044-47633428|MACS_peak_1452	17	12	5	7	10.2393	5.38818	2.08185	2.63317
chr11:86236861-86237281|MACS_peak_450	17	12	5	3	10.2393	5.38818	2.08185	1.1285
chr14:46403509-46403826|MACS_peak_608	17	1	4	4	10.2393	0.449015	1.66548	1.50467
chr10:95279949-95280313|MACS_peak_356	17	5	4	6	10.2393	2.24507	1.66548	2.257
chr7:2018226-2018559|MACS_peak_2763	17	5	4	4	10.2393	2.24507	1.66548	1.50467
chr17:75516374-75516751|MACS_peak_1104	17	6	4	5	10.2393	2.69409	1.66548	1.88084
chr12:133188329-133188629|MACS_peak_552	17	6	4	3	10.2393	2.69409	1.66548	1.1285
chr2:25116412-25116818|MACS_peak_1556	17	6	4	3	10.2393	2.69409	1.66548	1.1285
chr5:2750741-2751126|MACS_peak_2411	17	6	4	2	10.2393	2.69409	1.66548	0.752335
chr5:37269684-37269985|MACS_peak_2463	17	6	4	3	10.2393	2.69409	1.66548	1.1285
chr9:95611241-95611646|MACS_peak_3504	17	6	4	5	10.2393	2.69409	1.66548	1.88084
chr12:22553119-22553529|MACS_peak_507	17	7	4	2	10.2393	3.1431	1.66548	0.752335
chr9:132703764-132704077|MACS_peak_3529	17	7	4	2	10.2393	3.1431	1.66548	0.752335
chr1:228278220-228278620|MACS_peak_172	17	8	4	2	10.2393	3.59212	1.66548	0.752335
chr6:161599517-161599917|MACS_peak_2676	17	8	4	5	10.2393	3.59212	1.66548	1.88084
chr17:55547679-55548059|MACS_peak_1026	17	10	4	6	10.2393	4.49015	1.66548	2.257
chr17:78496519-78496832|MACS_peak_1112	17	10	4	4	10.2393	4.49015	1.66548	1.50467
chr12:133780878-133781239|MACS_peak_576	17	10	4	5	10.2393	4.49015	1.66548	1.88084
chr18:10506716-10507118|MACS_peak_1168	17	11	4	1	10.2393	4.93916	1.66548	0.376167
chr1:203863966-203864323|MACS_peak_163	17	12	4	2	10.2393	5.38818	1.66548	0.752335
chr20:57110772-57111117|MACS_peak_1923	17	14	4	5	10.2393	6.28621	1.66548	1.88084
chr10:75624110-75624464|MACS_peak_326	17	14	4	9	10.2393	6.28621	1.66548	3.38551
chr14:65271402-65271815|MACS_peak_670	17	15	4	6	10.2393	6.73522	1.66548	2.257
chr8:141044355-141044740|MACS_peak_3237	17	15	4	7	10.2393	6.73522	1.66548	2.63317
chr19:36948504-36948815|MACS_peak_1339	17	0	3	2	10.2393	0	1.24911	0.752335
chr2:119761532-119761879|MACS_peak_1727	17	1	3	5	10.2393	0.449015	1.24911	1.88084
chr15:21317222-21317525|MACS_peak_748	17	2	3	4	10.2393	0.898029	1.24911	1.50467
chr11:116419030-116419397|MACS_peak_467	17	2	3	2	10.2393	0.898029	1.24911	0.752335
chr9:38621017-38621351|MACS_peak_3482	17	2	3	2	10.2393	0.898029	1.24911	0.752335
chr17:60085042-60085429|MACS_peak_1050	17	3	3	3	10.2393	1.34704	1.24911	1.1285
chr20:60682342-60682659|MACS_peak_1940	17	3	3	3	10.2393	1.34704	1.24911	1.1285
chr1:116210041-116210393|MACS_peak_132	17	3	3	6	10.2393	1.34704	1.24911	2.257
chr6:56297608-56297930|MACS_peak_2636	17	3	3	3	10.2393	1.34704	1.24911	1.1285
chr12:129332521-129332982|MACS_peak_550	17	4	3	3	10.2393	1.79606	1.24911	1.1285
chr19:58510284-58510606|MACS_peak_1502	17	5	3	1	10.2393	2.24507	1.24911	0.376167
chr17:78335042-78335357|MACS_peak_1110	17	5	3	6	10.2393	2.24507	1.24911	2.257
chr11:12061911-12062305|MACS_peak_401	17	5	3	4	10.2393	2.24507	1.24911	1.50467
chr12:14504359-14504743|MACS_peak_500	17	5	3	1	10.2393	2.24507	1.24911	0.376167
chr1:159825244-159825641|MACS_peak_155	17	5	3	3	10.2393	2.24507	1.24911	1.1285
chr7:431410-431706|MACS_peak_2708	17	5	3	2	10.2393	2.24507	1.24911	0.752335
chr7:71877512-71877861|MACS_peak_3014	17	5	3	3	10.2393	2.24507	1.24911	1.1285
chr3:126775207-126775619|MACS_peak_2261	17	6	3	2	10.2393	2.69409	1.24911	0.752335
chr8:145787832-145788150|MACS_peak_3378	17	6	3	7	10.2393	2.69409	1.24911	2.63317
chr2:37875802-37876192|MACS_peak_1581	17	7	3	8	10.2393	3.1431	1.24911	3.00934
chr9:31959737-31960115|MACS_peak_3465	17	7	3	5	10.2393	3.1431	1.24911	1.88084
chr8:127689340-127689695|MACS_peak_3127	17	7	3	10	10.2393	3.1431	1.24911	3.76167
chr19:37181925-37182243|MACS_peak_1351	17	8	3	4	10.2393	3.59212	1.24911	1.50467
chr17:66737213-66737559|MACS_peak_1070	17	8	3	10	10.2393	3.59212	1.24911	3.76167
chr11:115939413-115939805|MACS_peak_466	17	8	3	5	10.2393	3.59212	1.24911	1.88084
chr9:136463212-136463557|MACS_peak_3537	17	8	3	0	10.2393	3.59212	1.24911	0
chr8:145779493-145779885|MACS_peak_3374	17	8	3	7	10.2393	3.59212	1.24911	2.63317
chr19:30659747-30660088|MACS_peak_1308	17	9	3	4	10.2393	4.04113	1.24911	1.50467
chr15:27979600-27980002|MACS_peak_760	17	9	3	3	10.2393	4.04113	1.24911	1.1285
chr7:4015183-4015493|MACS_peak_2791	17	12	3	2	10.2393	5.38818	1.24911	0.752335
chr5:151190405-151190786|MACS_peak_2546	17	14	3	6	10.2393	6.28621	1.24911	2.257
chr11:3382090-3382390|MACS_peak_396	17	17	3	1	10.2393	7.63325	1.24911	0.376167
chr1:19547057-19547405|MACS_peak_21	17	18	3	1	10.2393	8.08227	1.24911	0.376167
chr7:39363760-39364090|MACS_peak_2927	17	1	2	7	10.2393	0.449015	0.832739	2.63317
chr11:103263078-103263492|MACS_peak_456	17	3	2	2	10.2393	1.34704	0.832739	0.752335
chr5:72677698-72678031|MACS_peak_2502	17	3	2	2	10.2393	1.34704	0.832739	0.752335
chr8:144493162-144493459|MACS_peak_3346	17	3	2	4	10.2393	1.34704	0.832739	1.50467
chr15:69267941-69268336|MACS_peak_792	17	4	2	4	10.2393	1.79606	0.832739	1.50467
chr16:90060186-90060485|MACS_peak_973	17	4	2	5	10.2393	1.79606	0.832739	1.88084
chr1:40922525-40922848|MACS_peak_52	17	4	2	5	10.2393	1.79606	0.832739	1.88084
chr8:144325797-144326137|MACS_peak_3343	17	4	2	3	10.2393	1.79606	0.832739	1.1285
chr14:73221674-73222068|MACS_peak_718	17	5	2	8	10.2393	2.24507	0.832739	3.00934
chr2:65894306-65894630|MACS_peak_1626	17	5	2	5	10.2393	2.24507	0.832739	1.88084
chr8:140747152-140747547|MACS_peak_3195	17	5	2	9	10.2393	2.24507	0.832739	3.38551
chr17:75170045-75170357|MACS_peak_1101	17	6	2	2	10.2393	2.69409	0.832739	0.752335
chr13:113764622-113764954|MACS_peak_591	17	6	2	4	10.2393	2.69409	0.832739	1.50467
chr18:13548110-13548406|MACS_peak_1196	17	7	2	3	10.2393	3.1431	0.832739	1.1285
chr12:133630106-133630386|MACS_peak_561	17	8	2	2	10.2393	3.59212	0.832739	0.752335
chr20:60444947-60445302|MACS_peak_1934	17	8	2	1	10.2393	3.59212	0.832739	0.376167
chr7:4923196-4923509|MACS_peak_2823	17	8	2	4	10.2393	3.59212	0.832739	1.50467
chr6:37569322-37569659|MACS_peak_2610	17	9	2	3	10.2393	4.04113	0.832739	1.1285
chr19:45001169-45001460|MACS_peak_1444	17	10	2	0	10.2393	4.49015	0.832739	0
chr10:134925124-134925424|MACS_peak_384	17	10	2	5	10.2393	4.49015	0.832739	1.88084
chr7:40378913-40379257|MACS_peak_2929	17	10	2	5	10.2393	4.49015	0.832739	1.88084
chr7:130000572-130000878|MACS_peak_3037	17	10	2	3	10.2393	4.49015	0.832739	1.1285
chr1:41995776-41996145|MACS_peak_69	17	11	2	4	10.2393	4.93916	0.832739	1.50467
chr12:10907748-10908127|MACS_peak_490	17	12	2	2	10.2393	5.38818	0.832739	0.752335
chr1:247151951-247152330|MACS_peak_188	17	14	2	5	10.2393	6.28621	0.832739	1.88084
chr5:37270612-37270925|MACS_peak_2464	17	14	2	10	10.2393	6.28621	0.832739	3.76167
chr8:143242207-143242587|MACS_peak_3283	17	14	2	3	10.2393	6.28621	0.832739	1.1285
chr19:39025773-39026200|MACS_peak_1396	17	15	2	4	10.2393	6.73522	0.832739	1.50467
chr11:44108591-44108868|MACS_peak_410	17	3	1	4	10.2393	1.34704	0.41637	1.50467
chr1:113051116-113051417|MACS_peak_128	17	5	1	1	10.2393	2.24507	0.41637	0.376167
chr7:1867012-1867379|MACS_peak_2747	17	7	1	1	10.2393	3.1431	0.41637	0.376167
chr8:86064922-86065224|MACS_peak_3071	17	7	1	1	10.2393	3.1431	0.41637	0.376167
chr8:146152883-146153252|MACS_peak_3434	17	8	1	5	10.2393	3.59212	0.41637	1.88084
chr18:77490986-77491352|MACS_peak_1237	17	13	1	1	10.2393	5.83719	0.41637	0.376167
chr19:58198070-58198445|MACS_peak_1498	17	17	1	1	10.2393	7.63325	0.41637	0.376167
chr18:77592111-77592479|MACS_peak_1240	17	3	0	4	10.2393	1.34704	0	1.50467
chr2:216072434-216072736|MACS_peak_1777	17	3	0	1	10.2393	1.34704	0	0.376167
chr6:72294348-72294741|MACS_peak_2650	17	3	0	3	10.2393	1.34704	0	1.1285
chr17:80931642-80931995|MACS_peak_1131	17	4	0	5	10.2393	1.79606	0	1.88084
chr18:14997962-14998311|MACS_peak_1208	17	5	0	2	10.2393	2.24507	0	0.752335
chr22:37568854-37569163|MACS_peak_2121	17	6	0	5	10.2393	2.69409	0	1.88084
chr3:43633005-43633333|MACS_peak_2214	17	7	0	3	10.2393	3.1431	0	1.1285
chr10:77043862-77044185|MACS_peak_332	17	7	0	5	10.2393	3.1431	0	1.88084
chr7:386979-387388|MACS_peak_2703	17	7	0	8	10.2393	3.1431	0	3.00934
chr2:172280623-172281000|MACS_peak_1768	17	8	0	2	10.2393	3.59212	0	0.752335
chr16:3432990-3433330|MACS_peak_844	17	13	0	6	10.2393	5.83719	0	2.257
chr7:682977-683281|MACS_peak_2714	16	3	7	4	9.63702	1.34704	2.91459	1.50467
chr8:143380777-143381111|MACS_peak_3288	16	3	7	1	9.63702	1.34704	2.91459	0.376167
chr14:67041748-67042077|MACS_peak_677	16	6	7	9	9.63702	2.69409	2.91459	3.38551
chr8:126528424-126528784|MACS_peak_3125	16	8	7	8	9.63702	3.59212	2.91459	3.00934
chr9:104170580-104171005|MACS_peak_3517	16	10	7	6	9.63702	4.49015	2.91459	2.257
chr8:127162044-127162480|MACS_peak_3126	16	10	7	8	9.63702	4.49015	2.91459	3.00934
chr12:120868259-120868585|MACS_peak_540	16	11	7	5	9.63702	4.93916	2.91459	1.88084
chr8:143856882-143857323|MACS_peak_3326	16	1	6	8	9.63702	0.449015	2.49822	3.00934
chr22:46405334-46405687|MACS_peak_2144	16	2	6	2	9.63702	0.898029	2.49822	0.752335
chr15:62555980-62556381|MACS_peak_774	16	2	6	3	9.63702	0.898029	2.49822	1.1285
chr12:14494312-14494743|MACS_peak_499	16	4	6	4	9.63702	1.79606	2.49822	1.50467
chr17:70634456-70634779|MACS_peak_1079	16	5	6	4	9.63702	2.24507	2.49822	1.50467
chr20:30193814-30194167|MACS_peak_1822	16	5	6	4	9.63702	2.24507	2.49822	1.50467
chr8:144836489-144836856|MACS_peak_3358	16	6	6	10	9.63702	2.69409	2.49822	3.76167
chr3:128578024-128578401|MACS_peak_2266	16	7	6	3	9.63702	3.1431	2.49822	1.1285
chr22:27647636-27647986|MACS_peak_2066	16	8	6	9	9.63702	3.59212	2.49822	3.38551
chr1:112222338-112222715|MACS_peak_127	16	10	6	8	9.63702	4.49015	2.49822	3.00934
chr20:57102726-57103157|MACS_peak_1922	16	11	6	8	9.63702	4.93916	2.49822	3.00934
chr20:61780147-61780565|MACS_peak_1952	16	12	6	7	9.63702	5.38818	2.49822	2.63317
chr7:5102151-5102489|MACS_peak_2831	16	24	6	3	9.63702	10.7764	2.49822	1.1285
chr6:31168535-31168901|MACS_peak_2595	16	3	5	6	9.63702	1.34704	2.08185	2.257
chr8:125679968-125680343|MACS_peak_3120	16	3	5	5	9.63702	1.34704	2.08185	1.88084
chr2:122428623-122428981|MACS_peak_1734	16	5	5	1	9.63702	2.24507	2.08185	0.376167
chr7:4710208-4710526|MACS_peak_2818	16	6	5	6	9.63702	2.69409	2.08185	2.257
chr8:140940818-140941146|MACS_peak_3231	16	7	5	3	9.63702	3.1431	2.08185	1.1285
chr2:24337063-24337372|MACS_peak_1552	16	8	5	3	9.63702	3.59212	2.08185	1.1285
chr8:140209974-140210321|MACS_peak_3179	16	8	5	8	9.63702	3.59212	2.08185	3.00934
chr8:146190857-146191196|MACS_peak_3444	16	8	5	3	9.63702	3.59212	2.08185	1.1285
chr16:86369212-86369641|MACS_peak_949	16	9	5	1	9.63702	4.04113	2.08185	0.376167
chr11:111426216-111426555|MACS_peak_458	16	9	5	2	9.63702	4.04113	2.08185	0.752335
chr10:43485716-43486085|MACS_peak_273	16	9	5	2	9.63702	4.04113	2.08185	0.752335
chr6:40517383-40517803|MACS_peak_2620	16	9	5	2	9.63702	4.04113	2.08185	0.752335
chr1:22255071-22255415|MACS_peak_24	16	10	5	1	9.63702	4.49015	2.08185	0.376167
chr9:137552349-137552674|MACS_peak_3544	16	10	5	8	9.63702	4.49015	2.08185	3.00934
chr10:77115669-77116037|MACS_peak_334	16	11	5	6	9.63702	4.93916	2.08185	2.257
chr7:62255366-62255780|MACS_peak_2977	16	13	5	5	9.63702	5.83719	2.08185	1.88084
chrY:58982737-58983141|MACS_peak_3571	16	15	5	2	9.63702	6.73522	2.08185	0.752335
chr2:12161323-12161704|MACS_peak_1543	16	17	5	6	9.63702	7.63325	2.08185	2.257
chr10:44021246-44021583|MACS_peak_281	16	20	5	6	9.63702	8.98029	2.08185	2.257
chr17:80651314-80651601|MACS_peak_1119	16	4	4	3	9.63702	1.79606	1.66548	1.1285
chr9:138811148-138811548|MACS_peak_3550	16	4	4	3	9.63702	1.79606	1.66548	1.1285
chr3:56717322-56717655|MACS_peak_2230	16	5	4	3	9.63702	2.24507	1.66548	1.1285
chr2:31918740-31919006|MACS_peak_1572	16	5	4	3	9.63702	2.24507	1.66548	1.1285
chr10:80552897-80553166|MACS_peak_344	16	5	4	3	9.63702	2.24507	1.66548	1.1285
chr5:140696786-140697108|MACS_peak_2528	16	5	4	1	9.63702	2.24507	1.66548	0.376167
chr19:37658489-37658834|MACS_peak_1375	16	6	4	3	9.63702	2.69409	1.66548	1.1285
chr15:62945593-62945944|MACS_peak_777	16	6	4	3	9.63702	2.69409	1.66548	1.1285
chr15:70053997-70054353|MACS_peak_793	16	6	4	5	9.63702	2.69409	1.66548	1.88084
chr13:114526998-114527325|MACS_peak_598	16	6	4	7	9.63702	2.69409	1.66548	2.63317
chr7:1913352-1913655|MACS_peak_2753	16	6	4	4	9.63702	2.69409	1.66548	1.50467
chr7:71252190-71252517|MACS_peak_3012	16	6	4	1	9.63702	2.69409	1.66548	0.376167
chr19:44983974-44984287|MACS_peak_1439	16	7	4	4	9.63702	3.1431	1.66548	1.50467
chr18:659714-660044|MACS_peak_1141	16	7	4	5	9.63702	3.1431	1.66548	1.88084
chr1:17391721-17392036|MACS_peak_18	16	7	4	4	9.63702	3.1431	1.66548	1.50467
chr1:44395884-44396275|MACS_peak_80	16	7	4	3	9.63702	3.1431	1.66548	1.1285
chr9:27252078-27252483|MACS_peak_3458	16	7	4	4	9.63702	3.1431	1.66548	1.50467
chr22:29075037-29075359|MACS_peak_2086	16	8	4	2	9.63702	3.59212	1.66548	0.752335
chr18:2043784-2044143|MACS_peak_1146	16	8	4	5	9.63702	3.59212	1.66548	1.88084
chr2:87655593-87655896|MACS_peak_1647	16	8	4	5	9.63702	3.59212	1.66548	1.88084
chr7:596371-596673|MACS_peak_2711	16	8	4	1	9.63702	3.59212	1.66548	0.376167
chr7:720142-720513|MACS_peak_2718	16	9	4	5	9.63702	4.04113	1.66548	1.88084
chr5:178509642-178509995|MACS_peak_2575	16	9	4	6	9.63702	4.04113	1.66548	2.257
chr17:63804046-63804388|MACS_peak_1063	16	10	4	3	9.63702	4.49015	1.66548	1.1285
chr2:95882700-95883002|MACS_peak_1680	16	10	4	4	9.63702	4.49015	1.66548	1.50467
chr20:47825433-47825796|MACS_peak_1877	16	10	4	0	9.63702	4.49015	1.66548	0
chr3:10430036-10430465|MACS_peak_2192	16	11	4	3	9.63702	4.93916	1.66548	1.1285
chr7:304047-304366|MACS_peak_2699	16	11	4	6	9.63702	4.93916	1.66548	2.257
chr8:132274147-132274541|MACS_peak_3139	16	11	4	4	9.63702	4.93916	1.66548	1.50467
chr5:151210417-151210748|MACS_peak_2547	16	12	4	5	9.63702	5.38818	1.66548	1.88084
chr8:81350486-81350814|MACS_peak_3062	16	12	4	9	9.63702	5.38818	1.66548	3.38551
chr2:53583698-53584105|MACS_peak_1611	16	14	4	3	9.63702	6.28621	1.66548	1.1285
chr7:48411076-48411480|MACS_peak_2947	16	14	4	9	9.63702	6.28621	1.66548	3.38551
chr8:139218553-139218938|MACS_peak_3172	16	14	4	7	9.63702	6.28621	1.66548	2.63317
chr4:189378457-189378798|MACS_peak_2390	16	1	3	5	9.63702	0.449015	1.24911	1.88084
chr22:40633179-40633495|MACS_peak_2134	16	3	3	3	9.63702	1.34704	1.24911	1.1285
chr7:62532124-62532489|MACS_peak_2980	16	3	3	5	9.63702	1.34704	1.24911	1.88084
chr5:26852614-26852940|MACS_peak_2444	16	3	3	2	9.63702	1.34704	1.24911	0.752335
chr5:179708796-179709071|MACS_peak_2585	16	3	3	0	9.63702	1.34704	1.24911	0
chr22:49584395-49584852|MACS_peak_2166	16	4	3	5	9.63702	1.79606	1.24911	1.88084
chr16:72982792-72983109|MACS_peak_922	16	4	3	3	9.63702	1.79606	1.24911	1.1285
chr8:142989726-142990043|MACS_peak_3272	16	4	3	4	9.63702	1.79606	1.24911	1.50467
chr8:143500635-143500942|MACS_peak_3317	16	4	3	5	9.63702	1.79606	1.24911	1.88084
chr19:58701883-58702302|MACS_peak_1514	16	5	3	3	9.63702	2.24507	1.24911	1.1285
chr18:57013620-57013897|MACS_peak_1222	16	5	3	2	9.63702	2.24507	1.24911	0.752335
chr20:46322707-46323037|MACS_peak_1860	16	5	3	1	9.63702	2.24507	1.24911	0.376167
chr8:145944137-145944465|MACS_peak_3417	16	5	3	4	9.63702	2.24507	1.24911	1.50467
chr14:75052814-75053106|MACS_peak_725	16	6	3	2	9.63702	2.69409	1.24911	0.752335
chr14:75054472-75054879|MACS_peak_727	16	6	3	7	9.63702	2.69409	1.24911	2.63317
chr20:46636456-46636777|MACS_peak_1866	16	6	3	4	9.63702	2.69409	1.24911	1.50467
chr1:95083922-95084264|MACS_peak_108	16	6	3	7	9.63702	2.69409	1.24911	2.63317
chr7:38223838-38224127|MACS_peak_2926	16	6	3	5	9.63702	2.69409	1.24911	1.88084
chr5:17517615-17517882|MACS_peak_2440	16	6	3	7	9.63702	2.69409	1.24911	2.63317
chr18:13315289-13315660|MACS_peak_1190	16	7	3	7	9.63702	3.1431	1.24911	2.63317
chr10:43999827-44000127|MACS_peak_278	16	7	3	4	9.63702	3.1431	1.24911	1.50467
chr6:35877181-35877513|MACS_peak_2604	16	7	3	5	9.63702	3.1431	1.24911	1.88084
chr5:1040679-1041067|MACS_peak_2398	16	7	3	7	9.63702	3.1431	1.24911	2.63317
chr12:247557-247847|MACS_peak_469	16	8	3	0	9.63702	3.59212	1.24911	0
chr22:37723289-37723622|MACS_peak_2125	16	9	3	3	9.63702	4.04113	1.24911	1.1285
chr2:24336388-24336722|MACS_peak_1551	16	9	3	3	9.63702	4.04113	1.24911	1.1285
chr9:137170022-137170363|MACS_peak_3538	16	9	3	2	9.63702	4.04113	1.24911	0.752335
chr17:59750576-59751006|MACS_peak_1046	16	10	3	2	9.63702	4.49015	1.24911	0.752335
chr15:57443589-57443938|MACS_peak_768	16	10	3	1	9.63702	4.49015	1.24911	0.376167
chr14:65240981-65241300|MACS_peak_669	16	10	3	7	9.63702	4.49015	1.24911	2.63317
chr2:47434612-47434913|MACS_peak_1602	16	10	3	5	9.63702	4.49015	1.24911	1.88084
chr19:37212669-37213026|MACS_peak_1355	16	11	3	1	9.63702	4.93916	1.24911	0.376167
chr2:54347870-54348215|MACS_peak_1612	16	11	3	4	9.63702	4.93916	1.24911	1.50467
chr1:44702799-44703187|MACS_peak_82	16	11	3	7	9.63702	4.93916	1.24911	2.63317
chr6:71954930-71955337|MACS_peak_2649	16	11	3	5	9.63702	4.93916	1.24911	1.88084
chr5:151211363-151211652|MACS_peak_2549	16	11	3	4	9.63702	4.93916	1.24911	1.50467
chr8:104574985-104575387|MACS_peak_3088	16	11	3	5	9.63702	4.93916	1.24911	1.88084
chr3:110635978-110636365|MACS_peak_2248	16	12	3	0	9.63702	5.38818	1.24911	0
chr1:23689527-23689919|MACS_peak_29	16	15	3	5	9.63702	6.73522	1.24911	1.88084
chr19:58755482-58755777|MACS_peak_1524	16	1	2	2	9.63702	0.449015	0.832739	0.752335
chr18:514146-514532|MACS_peak_1138	16	2	2	2	9.63702	0.898029	0.832739	0.752335
chr13:114251826-114252177|MACS_peak_595	16	2	2	4	9.63702	0.898029	0.832739	1.50467
chr19:33210585-33210968|MACS_peak_1318	16	3	2	0	9.63702	1.34704	0.832739	0
chr2:138473076-138473416|MACS_peak_1757	16	3	2	2	9.63702	1.34704	0.832739	0.752335
chr7:5642274-5642584|MACS_peak_2860	16	3	2	6	9.63702	1.34704	0.832739	2.257
chr22:24623114-24623466|MACS_peak_2031	16	4	2	2	9.63702	1.79606	0.832739	0.752335
chr22:39658173-39658533|MACS_peak_2131	16	5	2	2	9.63702	2.24507	0.832739	0.752335
chr2:52798646-52798956|MACS_peak_1610	16	5	2	3	9.63702	2.24507	0.832739	1.1285
chr20:62184549-62184936|MACS_peak_1959	16	5	2	9	9.63702	2.24507	0.832739	3.38551
chr8:140817289-140817587|MACS_peak_3212	16	5	2	0	9.63702	2.24507	0.832739	0
chr19:747516-747857|MACS_peak_1252	16	6	2	4	9.63702	2.69409	0.832739	1.50467
chr18:77660481-77660812|MACS_peak_1244	16	6	2	2	9.63702	2.69409	0.832739	0.752335
chr15:59473249-59473607|MACS_peak_770	16	6	2	5	9.63702	2.69409	0.832739	1.88084
chr16:85259389-85259781|MACS_peak_945	16	6	2	7	9.63702	2.69409	0.832739	2.63317
chr11:63932085-63932443|MACS_peak_423	16	6	2	1	9.63702	2.69409	0.832739	0.376167
chr2:11239709-11240034|MACS_peak_1540	16	6	2	5	9.63702	2.69409	0.832739	1.88084
chr2:86187591-86187907|MACS_peak_1641	16	6	2	0	9.63702	2.69409	0.832739	0
chr2:95877980-95878284|MACS_peak_1678	16	6	2	6	9.63702	2.69409	0.832739	2.257
chr10:22765115-22765498|MACS_peak_207	16	6	2	3	9.63702	2.69409	0.832739	1.1285
chr7:64030239-64030608|MACS_peak_2997	16	6	2	3	9.63702	2.69409	0.832739	1.1285
chr4:41351544-41351931|MACS_peak_2308	16	6	2	6	9.63702	2.69409	0.832739	2.257
chr19:44359984-44360401|MACS_peak_1415	16	7	2	7	9.63702	3.1431	0.832739	2.63317
chr19:52853744-52854111|MACS_peak_1475	16	7	2	1	9.63702	3.1431	0.832739	0.376167
chr19:58094612-58094910|MACS_peak_1495	16	7	2	4	9.63702	3.1431	0.832739	1.50467
chr15:77330205-77330478|MACS_peak_800	16	7	2	4	9.63702	3.1431	0.832739	1.50467
chr1:27845474-27845833|MACS_peak_38	16	7	2	2	9.63702	3.1431	0.832739	0.752335
chr10:42818318-42818657|MACS_peak_256	16	7	2	3	9.63702	3.1431	0.832739	1.1285
chr5:121647863-121648206|MACS_peak_2517	16	7	2	4	9.63702	3.1431	0.832739	1.50467
chr5:149146143-149146502|MACS_peak_2538	16	7	2	7	9.63702	3.1431	0.832739	2.63317
chr9:133370073-133370368|MACS_peak_3530	16	7	2	3	9.63702	3.1431	0.832739	1.1285
chr19:52810378-52810682|MACS_peak_1472	16	8	2	2	9.63702	3.59212	0.832739	0.752335
chr22:49065314-49065664|MACS_peak_2164	16	8	2	2	9.63702	3.59212	0.832739	0.752335
chr16:33964777-33965046|MACS_peak_868	16	8	2	3	9.63702	3.59212	0.832739	1.1285
chr7:76839035-76839405|MACS_peak_3020	16	8	2	5	9.63702	3.59212	0.832739	1.88084
chr7:90063212-90063567|MACS_peak_3026	16	8	2	4	9.63702	3.59212	0.832739	1.50467
chr9:140371392-140371722|MACS_peak_3554	16	8	2	2	9.63702	3.59212	0.832739	0.752335
chr19:37258183-37258580|MACS_peak_1361	16	9	2	3	9.63702	4.04113	0.832739	1.1285
chr19:37825479-37825830|MACS_peak_1381	16	9	2	2	9.63702	4.04113	0.832739	0.752335
chr19:53060482-53060833|MACS_peak_1481	16	9	2	1	9.63702	4.04113	0.832739	0.376167
chr11:3367769-3368122|MACS_peak_395	16	9	2	6	9.63702	4.04113	0.832739	2.257
chr9:131931087-131931395|MACS_peak_3525	16	9	2	6	9.63702	4.04113	0.832739	2.257
chr22:35335809-35336186|MACS_peak_2104	16	10	2	2	9.63702	4.49015	0.832739	0.752335
chr12:12801366-12801749|MACS_peak_493	16	10	2	9	9.63702	4.49015	0.832739	3.38551
chr16:69670456-69670802|MACS_peak_915	16	11	2	1	9.63702	4.93916	0.832739	0.376167
chr2:129227420-129227781|MACS_peak_1745	16	11	2	11	9.63702	4.93916	0.832739	4.13784
chr2:133037769-133038118|MACS_peak_1753	16	11	2	5	9.63702	4.93916	0.832739	1.88084
chr12:32076086-32076384|MACS_peak_510	16	12	2	4	9.63702	5.38818	0.832739	1.50467
chr3:127610343-127610672|MACS_peak_2265	16	13	2	3	9.63702	5.83719	0.832739	1.1285
chr2:203017745-203018038|MACS_peak_1774	16	13	2	2	9.63702	5.83719	0.832739	0.752335
chr21:11131913-11132224|MACS_peak_1972	16	15	2	8	9.63702	6.73522	0.832739	3.00934
chr22:24749835-24750194|MACS_peak_2032	16	17	2	8	9.63702	7.63325	0.832739	3.00934
chr8:140767288-140767624|MACS_peak_3203	16	1	1	4	9.63702	0.449015	0.41637	1.50467
chr10:92591842-92592240|MACS_peak_352	16	2	1	2	9.63702	0.898029	0.41637	0.752335
chr5:179694843-179695167|MACS_peak_2584	16	2	1	3	9.63702	0.898029	0.41637	1.1285
chr9:29270240-29270486|MACS_peak_3463	16	3	1	5	9.63702	1.34704	0.41637	1.88084
chr2:34128713-34129065|MACS_peak_1575	16	4	1	0	9.63702	1.79606	0.41637	0
chr4:40408886-40409186|MACS_peak_2305	16	4	1	2	9.63702	1.79606	0.41637	0.752335
chr4:55523946-55524241|MACS_peak_2353	16	4	1	3	9.63702	1.79606	0.41637	1.1285
chr17:79157485-79157937|MACS_peak_1115	16	5	1	3	9.63702	2.24507	0.41637	1.1285
chr1:31345972-31346341|MACS_peak_41	16	6	1	0	9.63702	2.69409	0.41637	0
chr19:29724648-29724970|MACS_peak_1294	16	7	1	1	9.63702	3.1431	0.41637	0.376167
chr19:37369716-37370066|MACS_peak_1368	16	7	1	3	9.63702	3.1431	0.41637	1.1285
chr12:133568400-133568677|MACS_peak_558	16	7	1	1	9.63702	3.1431	0.41637	0.376167
chr4:100280746-100281122|MACS_peak_2383	16	7	1	2	9.63702	3.1431	0.41637	0.752335
chr19:38652951-38653225|MACS_peak_1395	16	8	1	3	9.63702	3.59212	0.41637	1.1285
chr18:8412107-8412495|MACS_peak_1155	16	8	1	4	9.63702	3.59212	0.41637	1.50467
chr21:44909182-44909468|MACS_peak_1999	16	8	1	3	9.63702	3.59212	0.41637	1.1285
chr2:242526570-242526884|MACS_peak_1803	16	10	1	2	9.63702	4.49015	0.41637	0.752335
chr7:2069681-2070009|MACS_peak_2766	16	10	1	3	9.63702	4.49015	0.41637	1.1285
chr15:25302165-25302477|MACS_peak_754	16	11	1	3	9.63702	4.93916	0.41637	1.1285
chr19:53313110-53313483|MACS_peak_1486	16	12	1	0	9.63702	5.38818	0.41637	0
chr13:113763867-113764254|MACS_peak_590	16	12	1	4	9.63702	5.38818	0.41637	1.50467
chr16:33240981-33241282|MACS_peak_866	16	13	1	2	9.63702	5.83719	0.41637	0.752335
chr20:50175321-50175695|MACS_peak_1890	16	13	1	3	9.63702	5.83719	0.41637	1.1285
chr7:6724628-6725006|MACS_peak_2887	16	13	1	8	9.63702	5.83719	0.41637	3.00934
chr21:32308552-32308857|MACS_peak_1986	16	14	1	3	9.63702	6.28621	0.41637	1.1285
chr18:6414356-6414697|MACS_peak_1151	16	2	0	1	9.63702	0.898029	0	0.376167
chr5:159776401-159776757|MACS_peak_2555	16	4	0	1	9.63702	1.79606	0	0.376167
chr7:56521659-56521991|MACS_peak_2963	16	5	0	5	9.63702	2.24507	0	1.88084
chr17:80709000-80709335|MACS_peak_1128	16	9	0	3	9.63702	4.04113	0	1.1285
chr9:130471464-130471791|MACS_peak_3523	16	9	0	2	9.63702	4.04113	0	0.752335
chr16:89654620-89654912|MACS_peak_968	16	10	0	4	9.63702	4.49015	0	1.50467
chr6:83640847-83641195|MACS_peak_2656	16	10	0	4	9.63702	4.49015	0	1.50467
chr19:44474416-44474733|MACS_peak_1430	16	17	0	2	9.63702	7.63325	0	0.752335
chr17:21312657-21313011|MACS_peak_988	15	1	7	5	9.0347	0.449015	2.91459	1.88084
chr5:172236310-172236660|MACS_peak_2563	15	3	7	2	9.0347	1.34704	2.91459	0.752335
chr8:141081312-141081636|MACS_peak_3241	15	3	7	6	9.0347	1.34704	2.91459	2.257
chr6:40705955-40706274|MACS_peak_2622	15	7	7	2	9.0347	3.1431	2.91459	0.752335
chr12:3827261-3827587|MACS_peak_480	15	8	7	4	9.0347	3.59212	2.91459	1.50467
chr14:65674137-65674433|MACS_peak_672	15	2	6	4	9.0347	0.898029	2.49822	1.50467
chr8:133912409-133912813|MACS_peak_3142	15	2	6	4	9.0347	0.898029	2.49822	1.50467
chr14:67083940-67084293|MACS_peak_679	15	5	6	2	9.0347	2.24507	2.49822	0.752335
chr6:67590660-67590970|MACS_peak_2646	15	5	6	2	9.0347	2.24507	2.49822	0.752335
chr9:35862239-35862535|MACS_peak_3474	15	5	6	2	9.0347	2.24507	2.49822	0.752335
chr18:9231427-9231749|MACS_peak_1159	15	7	6	7	9.0347	3.1431	2.49822	2.63317
chr14:62057743-62058103|MACS_peak_650	15	7	6	6	9.0347	3.1431	2.49822	2.257
chr5:111899279-111899648|MACS_peak_2512	15	7	6	4	9.0347	3.1431	2.49822	1.50467
chr17:41819372-41819682|MACS_peak_1015	15	8	6	2	9.0347	3.59212	2.49822	0.752335
chr13:114586992-114587362|MACS_peak_600	15	9	6	1	9.0347	4.04113	2.49822	0.376167
chr11:47673912-47674246|MACS_peak_412	15	10	6	2	9.0347	4.49015	2.49822	0.752335
chr5:143260754-143261180|MACS_peak_2535	15	13	6	2	9.0347	5.83719	2.49822	0.752335
chr2:112867363-112867732|MACS_peak_1715	15	14	6	3	9.0347	6.28621	2.49822	1.1285
chr19:37039359-37039656|MACS_peak_1346	15	15	6	0	9.0347	6.73522	2.49822	0
chr1:41911286-41911515|MACS_peak_68	15	1	5	4	9.0347	0.449015	2.08185	1.50467
chr22:50263439-50263748|MACS_peak_2178	15	5	5	8	9.0347	2.24507	2.08185	3.00934
chr7:596923-597364|MACS_peak_2712	15	5	5	9	9.0347	2.24507	2.08185	3.38551
chr6:40195684-40195989|MACS_peak_2618	15	5	5	8	9.0347	2.24507	2.08185	3.00934
chr4:38326866-38327253|MACS_peak_2299	15	5	5	6	9.0347	2.24507	2.08185	2.257
chr9:99571804-99572154|MACS_peak_3510	15	5	5	5	9.0347	2.24507	2.08185	1.88084
chr8:140752054-140752467|MACS_peak_3197	15	5	5	10	9.0347	2.24507	2.08185	3.76167
chr15:20487973-20488320|MACS_peak_741	15	6	5	9	9.0347	2.69409	2.08185	3.38551
chr2:129032156-129032458|MACS_peak_1742	15	6	5	7	9.0347	2.69409	2.08185	2.63317
chr8:122454785-122455167|MACS_peak_3108	15	6	5	9	9.0347	2.69409	2.08185	3.38551
chr19:37239009-37239351|MACS_peak_1358	15	7	5	6	9.0347	3.1431	2.08185	2.257
chr19:44464622-44465024|MACS_peak_1425	15	7	5	1	9.0347	3.1431	2.08185	0.376167
chr7:40929950-40930295|MACS_peak_2930	15	7	5	11	9.0347	3.1431	2.08185	4.13784
chr4:49516436-49516684|MACS_peak_2342	15	7	5	4	9.0347	3.1431	2.08185	1.50467
chr4:73877678-73877924|MACS_peak_2368	15	7	5	1	9.0347	3.1431	2.08185	0.376167
chr19:52534927-52535248|MACS_peak_1463	15	8	5	5	9.0347	3.59212	2.08185	1.88084
chr17:21212289-21212618|MACS_peak_987	15	8	5	6	9.0347	3.59212	2.08185	2.257
chr20:60684449-60684789|MACS_peak_1942	15	8	5	7	9.0347	3.59212	2.08185	2.63317
chr1:51376294-51376648|MACS_peak_92	15	8	5	3	9.0347	3.59212	2.08185	1.1285
chr5:179692130-179692484|MACS_peak_2583	15	8	5	2	9.0347	3.59212	2.08185	0.752335
chr19:44349241-44349565|MACS_peak_1410	15	10	5	4	9.0347	4.49015	2.08185	1.50467
chr2:95855488-95855837|MACS_peak_1677	15	10	5	3	9.0347	4.49015	2.08185	1.1285
chr1:110469046-110469339|MACS_peak_119	15	11	5	5	9.0347	4.93916	2.08185	1.88084
chr19:8917747-8918048|MACS_peak_1263	15	13	5	1	9.0347	5.83719	2.08185	0.376167
chr16:75203013-75203325|MACS_peak_930	15	13	5	7	9.0347	5.83719	2.08185	2.63317
chr5:9922834-9923208|MACS_peak_2426	15	14	5	7	9.0347	6.28621	2.08185	2.63317
chr19:53057174-53057480|MACS_peak_1479	15	3	4	3	9.0347	1.34704	1.66548	1.1285
chr2:32044918-32045268|MACS_peak_1573	15	3	4	0	9.0347	1.34704	1.66548	0
chr5:170006490-170006843|MACS_peak_2558	15	3	4	1	9.0347	1.34704	1.66548	0.376167
chr4:66879783-66880051|MACS_peak_2361	15	3	4	2	9.0347	1.34704	1.66548	0.752335
chr8:142566058-142566361|MACS_peak_3256	15	3	4	2	9.0347	1.34704	1.66548	0.752335
chr8:143131073-143131384|MACS_peak_3278	15	3	4	3	9.0347	1.34704	1.66548	1.1285
chr22:44520712-44520995|MACS_peak_2140	15	4	4	5	9.0347	1.79606	1.66548	1.88084
chr22:48958362-48958655|MACS_peak_2161	15	4	4	5	9.0347	1.79606	1.66548	1.88084
chr2:46075442-46075793|MACS_peak_1599	15	4	4	10	9.0347	1.79606	1.66548	3.76167
chr1:25048079-25048433|MACS_peak_32	15	4	4	1	9.0347	1.79606	1.66548	0.376167
chr1:53564973-53565316|MACS_peak_96	15	4	4	2	9.0347	1.79606	1.66548	0.752335
chr12:6457060-6457414|MACS_peak_482	15	5	4	6	9.0347	2.24507	1.66548	2.257
chr12:9505759-9506084|MACS_peak_486	15	5	4	5	9.0347	2.24507	1.66548	1.88084
chr21:15446359-15446735|MACS_peak_1976	15	5	4	4	9.0347	2.24507	1.66548	1.50467
chr7:1769422-1769761|MACS_peak_2743	15	5	4	4	9.0347	2.24507	1.66548	1.50467
chr8:141088807-141089085|MACS_peak_3242	15	5	4	1	9.0347	2.24507	1.66548	0.376167
chr22:47858936-47859345|MACS_peak_2151	15	6	4	7	9.0347	2.69409	1.66548	2.63317
chr17:75700558-75700881|MACS_peak_1106	15	6	4	4	9.0347	2.69409	1.66548	1.50467
chr2:81423072-81423375|MACS_peak_1639	15	6	4	5	9.0347	2.69409	1.66548	1.88084
chr2:97096024-97096312|MACS_peak_1687	15	6	4	2	9.0347	2.69409	1.66548	0.752335
chr20:57077797-57078132|MACS_peak_1920	15	6	4	13	9.0347	2.69409	1.66548	4.89018
chr6:56864479-56864792|MACS_peak_2637	15	6	4	5	9.0347	2.69409	1.66548	1.88084
chr11:65619399-65619771|MACS_peak_426	15	7	4	4	9.0347	3.1431	1.66548	1.50467
chr2:96499044-96499349|MACS_peak_1686	15	7	4	3	9.0347	3.1431	1.66548	1.1285
chr1:27471617-27471940|MACS_peak_37	15	7	4	4	9.0347	3.1431	1.66548	1.50467
chr7:3276523-3276843|MACS_peak_2787	15	7	4	4	9.0347	3.1431	1.66548	1.50467
chr6:161645351-161645713|MACS_peak_2677	15	7	4	1	9.0347	3.1431	1.66548	0.376167
chr18:9601263-9601662|MACS_peak_1162	15	8	4	3	9.0347	3.59212	1.66548	1.1285
chr15:69222332-69222666|MACS_peak_790	15	8	4	3	9.0347	3.59212	1.66548	1.1285
chr20:50837409-50837720|MACS_peak_1895	15	8	4	5	9.0347	3.59212	1.66548	1.88084
chr1:40975971-40976312|MACS_peak_60	15	9	4	6	9.0347	4.04113	1.66548	2.257
chr7:57229933-57230289|MACS_peak_2967	15	9	4	3	9.0347	4.04113	1.66548	1.1285
chr6:37563863-37564166|MACS_peak_2608	15	9	4	4	9.0347	4.04113	1.66548	1.50467
chr5:711078-711447|MACS_peak_2396	15	9	4	6	9.0347	4.04113	1.66548	2.257
chr8:138482429-138482817|MACS_peak_3170	15	9	4	7	9.0347	4.04113	1.66548	2.63317
chr8:140886428-140886728|MACS_peak_3225	15	9	4	4	9.0347	4.04113	1.66548	1.50467
chr19:29247711-29248072|MACS_peak_1290	15	10	4	2	9.0347	4.49015	1.66548	0.752335
chr10:76576532-76576932|MACS_peak_330	15	10	4	9	9.0347	4.49015	1.66548	3.38551
chr8:144054878-144055178|MACS_peak_3336	15	10	4	5	9.0347	4.49015	1.66548	1.88084
chr19:29995674-29995969|MACS_peak_1299	15	12	4	2	9.0347	5.38818	1.66548	0.752335
chr1:2586972-2587313|MACS_peak_6	15	12	4	5	9.0347	5.38818	1.66548	1.88084
chr20:36647206-36647504|MACS_peak_1831	15	13	4	4	9.0347	5.83719	1.66548	1.50467
chr5:170288256-170288597|MACS_peak_2559	15	13	4	3	9.0347	5.83719	1.66548	1.1285
chr18:77331780-77332054|MACS_peak_1232	15	1	3	3	9.0347	0.449015	1.24911	1.1285
chr16:84351908-84352250|MACS_peak_940	15	1	3	5	9.0347	0.449015	1.24911	1.88084
chr22:49589666-49590006|MACS_peak_2167	15	2	3	7	9.0347	0.898029	1.24911	2.63317
chr18:77678553-77678858|MACS_peak_1247	15	2	3	2	9.0347	0.898029	1.24911	0.752335
chr3:40175373-40175780|MACS_peak_2212	15	3	3	1	9.0347	1.34704	1.24911	0.376167
chr10:62800059-62800340|MACS_peak_312	15	3	3	5	9.0347	1.34704	1.24911	1.88084
chr10:77044804-77045132|MACS_peak_333	15	3	3	1	9.0347	1.34704	1.24911	0.376167
chr7:591881-592155|MACS_peak_2710	15	3	3	2	9.0347	1.34704	1.24911	0.752335
chr19:33195674-33195982|MACS_peak_1317	15	4	3	1	9.0347	1.79606	1.24911	0.376167
chr19:37014988-37015269|MACS_peak_1345	15	4	3	4	9.0347	1.79606	1.24911	1.50467
chr19:46893385-46893643|MACS_peak_1450	15	4	3	5	9.0347	1.79606	1.24911	1.88084
chr14:73360843-73361132|MACS_peak_723	15	4	3	8	9.0347	1.79606	1.24911	3.00934
chr11:67062833-67063172|MACS_peak_429	15	4	3	1	9.0347	1.79606	1.24911	0.376167
chr11:113525490-113525792|MACS_peak_462	15	4	3	4	9.0347	1.79606	1.24911	1.50467
chr20:58187195-58187559|MACS_peak_1932	15	4	3	2	9.0347	1.79606	1.24911	0.752335
chr1:229567491-229567886|MACS_peak_174	15	4	3	2	9.0347	1.79606	1.24911	0.752335
chr7:4351183-4351471|MACS_peak_2801	15	4	3	4	9.0347	1.79606	1.24911	1.50467
chr5:124589162-124589481|MACS_peak_2520	15	4	3	0	9.0347	1.79606	1.24911	0
chr8:122068559-122068935|MACS_peak_3106	15	4	3	5	9.0347	1.79606	1.24911	1.88084
chr8:140859036-140859463|MACS_peak_3220	15	4	3	6	9.0347	1.79606	1.24911	2.257
chr22:35377514-35377873|MACS_peak_2105	15	5	3	6	9.0347	2.24507	1.24911	2.257
chr2:43289046-43289461|MACS_peak_1591	15	5	3	7	9.0347	2.24507	1.24911	2.63317
chr1:247156174-247156486|MACS_peak_189	15	5	3	3	9.0347	2.24507	1.24911	1.1285
chr7:7990857-7991170|MACS_peak_2900	15	5	3	9	9.0347	2.24507	1.24911	3.38551
chr3:16123163-16123511|MACS_peak_2200	15	6	3	5	9.0347	2.69409	1.24911	1.88084
chr2:97104752-97105140|MACS_peak_1689	15	6	3	2	9.0347	2.69409	1.24911	0.752335
chr7:297512-297822|MACS_peak_2693	15	6	3	2	9.0347	2.69409	1.24911	0.752335
chr7:729657-729979|MACS_peak_2720	15	6	3	0	9.0347	2.69409	1.24911	0
chr6:28278918-28279284|MACS_peak_2592	15	6	3	1	9.0347	2.69409	1.24911	0.376167
chr19:46893010-46893349|MACS_peak_1449	15	7	3	6	9.0347	3.1431	1.24911	2.257
chr15:67046632-67046998|MACS_peak_782	15	7	3	1	9.0347	3.1431	1.24911	0.376167
chr3:123464722-123465089|MACS_peak_2256	15	7	3	4	9.0347	3.1431	1.24911	1.50467
chr20:46547340-46547665|MACS_peak_1863	15	7	3	8	9.0347	3.1431	1.24911	3.00934
chr5:35920954-35921342|MACS_peak_2458	15	7	3	6	9.0347	3.1431	1.24911	2.257
chr8:99986429-99986748|MACS_peak_3085	15	7	3	4	9.0347	3.1431	1.24911	1.50467
chr19:30592045-30592373|MACS_peak_1303	15	8	3	1	9.0347	3.59212	1.24911	0.376167
chr20:45301155-45301533|MACS_peak_1851	15	8	3	6	9.0347	3.59212	1.24911	2.257
chr6:44027763-44028139|MACS_peak_2625	15	8	3	6	9.0347	3.59212	1.24911	2.257
chr5:31776643-31776944|MACS_peak_2450	15	8	3	3	9.0347	3.59212	1.24911	1.1285
chr5:154462262-154462636|MACS_peak_2554	15	8	3	5	9.0347	3.59212	1.24911	1.88084
chr4:53200154-53200553|MACS_peak_2345	15	8	3	4	9.0347	3.59212	1.24911	1.50467
chr9:139667872-139668181|MACS_peak_3551	15	8	3	1	9.0347	3.59212	1.24911	0.376167
chr8:29366297-29366632|MACS_peak_3047	15	8	3	3	9.0347	3.59212	1.24911	1.1285
chr8:145811198-145811537|MACS_peak_3383	15	8	3	6	9.0347	3.59212	1.24911	2.257
chr7:428771-429157|MACS_peak_2707	15	9	3	5	9.0347	4.04113	1.24911	1.88084
chr8:126465133-126465461|MACS_peak_3123	15	9	3	11	9.0347	4.04113	1.24911	4.13784
chr8:142991300-142991648|MACS_peak_3273	15	9	3	5	9.0347	4.04113	1.24911	1.88084
chr14:65994909-65995189|MACS_peak_674	15	11	3	4	9.0347	4.93916	1.24911	1.50467
chr22:23790541-23790836|MACS_peak_2025	15	13	3	3	9.0347	5.83719	1.24911	1.1285
chr2:242645556-242645937|MACS_peak_1804	15	13	3	2	9.0347	5.83719	1.24911	0.752335
chr20:50071167-50071545|MACS_peak_1889	15	13	3	6	9.0347	5.83719	1.24911	2.257
chr2:96484513-96484806|MACS_peak_1682	15	14	3	7	9.0347	6.28621	1.24911	2.63317
chr12:124809052-124809405|MACS_peak_542	15	16	3	1	9.0347	7.18424	1.24911	0.376167
chr12:133620767-133621109|MACS_peak_560	15	16	3	4	9.0347	7.18424	1.24911	1.50467
chr19:36726951-36727284|MACS_peak_1328	15	17	3	1	9.0347	7.63325	1.24911	0.376167
chr19:44982597-44982995|MACS_peak_1438	15	18	3	6	9.0347	8.08227	1.24911	2.257
chr12:37939503-37939824|MACS_peak_514	15	2	2	3	9.0347	0.898029	0.832739	1.1285
chr2:87644334-87644597|MACS_peak_1646	15	2	2	2	9.0347	0.898029	0.832739	0.752335
chr19:12635756-12636062|MACS_peak_1275	15	3	2	1	9.0347	1.34704	0.832739	0.376167
chr19:58693375-58693699|MACS_peak_1510	15	3	2	6	9.0347	1.34704	0.832739	2.257
chr18:77662699-77663060|MACS_peak_1245	15	3	2	3	9.0347	1.34704	0.832739	1.1285
chr12:117620559-117620932|MACS_peak_536	15	3	2	3	9.0347	1.34704	0.832739	1.1285
chr1:146830066-146830408|MACS_peak_148	15	3	2	2	9.0347	1.34704	0.832739	0.752335
chr9:96813062-96813371|MACS_peak_3507	15	3	2	4	9.0347	1.34704	0.832739	1.50467
chr8:143454932-143455285|MACS_peak_3314	15	3	2	6	9.0347	1.34704	0.832739	2.257
chr19:29489357-29489654|MACS_peak_1291	15	4	2	2	9.0347	1.79606	0.832739	0.752335
chr22:50421833-50422140|MACS_peak_2179	15	4	2	1	9.0347	1.79606	0.832739	0.376167
chr18:46317795-46318095|MACS_peak_1217	15	4	2	1	9.0347	1.79606	0.832739	0.376167
chr16:33237800-33238122|MACS_peak_865	15	4	2	2	9.0347	1.79606	0.832739	0.752335
chr10:21987745-21988072|MACS_peak_205	15	4	2	4	9.0347	1.79606	0.832739	1.50467
chr6:124998182-124998498|MACS_peak_2659	15	4	2	2	9.0347	1.79606	0.832739	0.752335
chr4:44751487-44751801|MACS_peak_2314	15	4	2	4	9.0347	1.79606	0.832739	1.50467
chr8:146169688-146169992|MACS_peak_3442	15	4	2	1	9.0347	1.79606	0.832739	0.376167
chr19:38040867-38041245|MACS_peak_1386	15	5	2	3	9.0347	2.24507	0.832739	1.1285
chr12:13554089-13554405|MACS_peak_495	15	5	2	3	9.0347	2.24507	0.832739	1.1285
chr3:195512269-195512610|MACS_peak_2276	15	5	2	5	9.0347	2.24507	0.832739	1.88084
chr2:72649199-72649544|MACS_peak_1633	15	5	2	5	9.0347	2.24507	0.832739	1.88084
chr10:24465637-24465968|MACS_peak_209	15	5	2	2	9.0347	2.24507	0.832739	0.752335
chr7:27284558-27284903|MACS_peak_2904	15	5	2	3	9.0347	2.24507	0.832739	1.1285
chr5:650199-650497|MACS_peak_2395	15	5	2	3	9.0347	2.24507	0.832739	1.1285
chr5:41205435-41205741|MACS_peak_2473	15	5	2	3	9.0347	2.24507	0.832739	1.1285
chr5:112848525-112848844|MACS_peak_2515	15	5	2	5	9.0347	2.24507	0.832739	1.88084
chr9:35138601-35138980|MACS_peak_3469	15	5	2	4	9.0347	2.24507	0.832739	1.50467
chr8:144746662-144746954|MACS_peak_3354	15	5	2	5	9.0347	2.24507	0.832739	1.88084
chr19:5534552-5534847|MACS_peak_1261	15	6	2	3	9.0347	2.69409	0.832739	1.1285
chr22:37569597-37569923|MACS_peak_2122	15	6	2	2	9.0347	2.69409	0.832739	0.752335
chr2:120371026-120371365|MACS_peak_1728	15	6	2	3	9.0347	2.69409	0.832739	1.1285
chr6:158814099-158814401|MACS_peak_2672	15	6	2	3	9.0347	2.69409	0.832739	1.1285
chr2:95846451-95846756|MACS_peak_1676	15	7	2	7	9.0347	3.1431	0.832739	2.63317
chr6:35876546-35876824|MACS_peak_2603	15	7	2	3	9.0347	3.1431	0.832739	1.1285
chr4:88254848-88255125|MACS_peak_2374	15	7	2	1	9.0347	3.1431	0.832739	0.376167
chr8:143398393-143398726|MACS_peak_3298	15	7	2	1	9.0347	3.1431	0.832739	0.376167
chr18:19750025-19750327|MACS_peak_1214	15	8	2	2	9.0347	3.59212	0.832739	0.752335
chr15:65306033-65306435|MACS_peak_779	15	8	2	6	9.0347	3.59212	0.832739	2.257
chr11:11281769-11282042|MACS_peak_400	15	8	2	4	9.0347	3.59212	0.832739	1.50467
chr3:38474508-38474904|MACS_peak_2211	15	8	2	3	9.0347	3.59212	0.832739	1.1285
chr2:151517173-151517476|MACS_peak_1760	15	8	2	1	9.0347	3.59212	0.832739	0.376167
chr20:60688583-60688885|MACS_peak_1943	15	8	2	2	9.0347	3.59212	0.832739	0.752335
chr19:37205960-37206281|MACS_peak_1352	15	9	2	3	9.0347	4.04113	0.832739	1.1285
chr2:103533491-103533805|MACS_peak_1703	15	9	2	1	9.0347	4.04113	0.832739	0.376167
chr2:134887728-134888074|MACS_peak_1756	15	9	2	2	9.0347	4.04113	0.832739	0.752335
chr19:52571449-52571804|MACS_peak_1467	15	11	2	4	9.0347	4.93916	0.832739	1.50467
chr18:1098371-1098803|MACS_peak_1144	15	11	2	1	9.0347	4.93916	0.832739	0.376167
chr10:73706045-73706459|MACS_peak_324	15	14	2	6	9.0347	6.28621	0.832739	2.257
chr12:133778696-133779066|MACS_peak_574	15	19	2	3	9.0347	8.53128	0.832739	1.1285
chr7:56541987-56542279|MACS_peak_2966	15	1	1	1	9.0347	0.449015	0.41637	0.376167
chr9:107399112-107399429|MACS_peak_3518	15	1	1	1	9.0347	0.449015	0.41637	0.376167
chr1:227748561-227748880|MACS_peak_171	15	2	1	0	9.0347	0.898029	0.41637	0
chr22:48955118-48955420|MACS_peak_2159	15	3	1	0	9.0347	1.34704	0.41637	0
chr2:241464405-241464679|MACS_peak_1798	15	3	1	4	9.0347	1.34704	0.41637	1.50467
chr20:54285577-54285883|MACS_peak_1899	15	3	1	1	9.0347	1.34704	0.41637	0.376167
chr5:117543458-117543759|MACS_peak_2516	15	3	1	2	9.0347	1.34704	0.41637	0.752335
chr18:13356823-13357109|MACS_peak_1192	15	4	1	2	9.0347	1.79606	0.41637	0.752335
chr12:47851139-47851478|MACS_peak_520	15	4	1	2	9.0347	1.79606	0.41637	0.752335
chr3:13578155-13578563|MACS_peak_2196	15	4	1	5	9.0347	1.79606	0.41637	1.88084
chr2:52007477-52007836|MACS_peak_1609	15	4	1	0	9.0347	1.79606	0.41637	0
chr1:42700381-42700746|MACS_peak_71	15	4	1	4	9.0347	1.79606	0.41637	1.50467
chr19:58571513-58571916|MACS_peak_1504	15	5	1	6	9.0347	2.24507	0.41637	2.257
chr14:72752507-72752813|MACS_peak_713	15	5	1	5	9.0347	2.24507	0.41637	1.88084
chr2:90475452-90475806|MACS_peak_1661	15	5	1	6	9.0347	2.24507	0.41637	2.257
chr7:96768088-96768432|MACS_peak_3029	15	5	1	3	9.0347	2.24507	0.41637	1.1285
chr5:65401990-65402270|MACS_peak_2496	15	5	1	4	9.0347	2.24507	0.41637	1.50467
chr8:120574501-120574823|MACS_peak_3103	15	5	1	2	9.0347	2.24507	0.41637	0.752335
chr8:142988367-142988724|MACS_peak_3271	15	5	1	3	9.0347	2.24507	0.41637	1.1285
chr22:48728614-48728950|MACS_peak_2155	15	6	1	3	9.0347	2.69409	0.41637	1.1285
chr15:21317772-21318064|MACS_peak_749	15	6	1	1	9.0347	2.69409	0.41637	0.376167
chr17:79497244-79497620|MACS_peak_1116	15	7	1	7	9.0347	3.1431	0.41637	2.63317
chr14:106873357-106873652|MACS_peak_734	15	7	1	1	9.0347	3.1431	0.41637	0.376167
chr11:1092808-1093080|MACS_peak_389	15	7	1	7	9.0347	3.1431	0.41637	2.63317
chr11:48576476-48576786|MACS_peak_415	15	7	1	2	9.0347	3.1431	0.41637	0.752335
chr11:65618957-65619272|MACS_peak_425	15	7	1	5	9.0347	3.1431	0.41637	1.88084
chr6:49242807-49243122|MACS_peak_2628	15	7	1	3	9.0347	3.1431	0.41637	1.1285
chr5:151210911-151211245|MACS_peak_2548	15	7	1	3	9.0347	3.1431	0.41637	1.1285
chr8:142042075-142042452|MACS_peak_3249	15	7	1	12	9.0347	3.1431	0.41637	4.51401
chr8:142647141-142647461|MACS_peak_3260	15	7	1	4	9.0347	3.1431	0.41637	1.50467
chr12:125237844-125238118|MACS_peak_549	15	8	1	3	9.0347	3.59212	0.41637	1.1285
chr3:122674818-122675153|MACS_peak_2255	15	8	1	4	9.0347	3.59212	0.41637	1.50467
chr2:120908676-120909053|MACS_peak_1730	15	8	1	4	9.0347	3.59212	0.41637	1.50467
chr20:3503061-3503379|MACS_peak_1810	15	8	1	1	9.0347	3.59212	0.41637	0.376167
chr1:146770696-146771059|MACS_peak_147	15	8	1	2	9.0347	3.59212	0.41637	0.752335
chr11:98055922-98056239|MACS_peak_453	15	9	1	3	9.0347	4.04113	0.41637	1.1285
chr2:23352025-23352306|MACS_peak_1548	15	9	1	4	9.0347	4.04113	0.41637	1.50467
chr19:38286984-38287394|MACS_peak_1391	15	11	1	5	9.0347	4.93916	0.41637	1.88084
chr5:7438286-7438571|MACS_peak_2418	15	11	1	2	9.0347	4.93916	0.41637	0.752335
chr7:50198222-50198649|MACS_peak_2949	15	1	0	2	9.0347	0.449015	0	0.752335
chr19:58755008-58755331|MACS_peak_1523	15	3	0	1	9.0347	1.34704	0	0.376167
chr22:49945372-49945722|MACS_peak_2175	15	3	0	1	9.0347	1.34704	0	0.376167
chr12:124810408-124810710|MACS_peak_545	15	3	0	2	9.0347	1.34704	0	0.752335
chr3:119758852-119759157|MACS_peak_2252	15	4	0	4	9.0347	1.79606	0	1.50467
chr20:55459980-55460282|MACS_peak_1906	15	4	0	7	9.0347	1.79606	0	2.63317
chr6:168072984-168073234|MACS_peak_2679	15	4	0	4	9.0347	1.79606	0	1.50467
chr15:25462324-25462672|MACS_peak_757	15	5	0	3	9.0347	2.24507	0	1.1285
chr1:247264355-247264684|MACS_peak_192	15	5	0	4	9.0347	2.24507	0	1.50467
chr4:49061981-49062293|MACS_peak_2318	15	5	0	0	9.0347	2.24507	0	0
chr14:106765118-106765422|MACS_peak_733	15	6	0	1	9.0347	2.69409	0	0.376167
chr5:140774279-140774542|MACS_peak_2533	15	6	0	1	9.0347	2.69409	0	0.376167
chr2:241752029-241752366|MACS_peak_1800	15	9	0	2	9.0347	4.04113	0	0.752335
chr1:43773714-43774039|MACS_peak_77	15	9	0	1	9.0347	4.04113	0	0.376167
chr18:48549620-48549931|MACS_peak_1218	15	10	0	0	9.0347	4.49015	0	0
chr14:51521306-51521627|MACS_peak_615	14	3	6	3	8.43239	1.34704	2.49822	1.1285
chr7:46509079-46509368|MACS_peak_2945	14	5	6	4	8.43239	2.24507	2.49822	1.50467
chr14:65239564-65239874|MACS_peak_667	14	6	6	3	8.43239	2.69409	2.49822	1.1285
chr8:143564557-143564852|MACS_peak_3323	14	8	6	3	8.43239	3.59212	2.49822	1.1285
chr3:75755900-75756268|MACS_peak_2236	14	10	6	9	8.43239	4.49015	2.49822	3.38551
chr8:124595688-124596039|MACS_peak_3116	14	13	6	12	8.43239	5.83719	2.49822	4.51401
chr17:22254583-22254895|MACS_peak_993	14	21	6	14	8.43239	9.42931	2.49822	5.26634
chr4:57687525-57687842|MACS_peak_2355	14	0	5	2	8.43239	0	2.08185	0.752335
chr17:69804133-69804443|MACS_peak_1075	14	1	5	7	8.43239	0.449015	2.08185	2.63317
chr6:90933090-90933365|MACS_peak_2657	14	1	5	2	8.43239	0.449015	2.08185	0.752335
chr7:35495117-35495396|MACS_peak_2920	14	2	5	1	8.43239	0.898029	2.08185	0.376167
chr5:40885804-40886198|MACS_peak_2472	14	2	5	1	8.43239	0.898029	2.08185	0.376167
chr8:135687487-135687807|MACS_peak_3157	14	3	5	1	8.43239	1.34704	2.08185	0.376167
chr3:196977586-196977912|MACS_peak_2279	14	4	5	4	8.43239	1.79606	2.08185	1.50467
chr20:62356467-62356812|MACS_peak_1960	14	4	5	3	8.43239	1.79606	2.08185	1.1285
chr7:4832021-4832349|MACS_peak_2820	14	4	5	4	8.43239	1.79606	2.08185	1.50467
chr8:141051660-141051998|MACS_peak_3239	14	4	5	5	8.43239	1.79606	2.08185	1.88084
chr3:197186482-197186853|MACS_peak_2280	14	5	5	10	8.43239	2.24507	2.08185	3.76167
chr19:44350614-44350994|MACS_peak_1411	14	6	5	5	8.43239	2.69409	2.08185	1.88084
chr7:51627159-51627460|MACS_peak_2954	14	6	5	4	8.43239	2.69409	2.08185	1.50467
chr20:61982593-61982879|MACS_peak_1955	14	7	5	5	8.43239	3.1431	2.08185	1.88084
chr8:29367796-29368093|MACS_peak_3048	14	7	5	4	8.43239	3.1431	2.08185	1.50467
chr7:5135243-5135566|MACS_peak_2838	14	8	5	5	8.43239	3.59212	2.08185	1.88084
chr7:129999738-130000061|MACS_peak_3036	14	9	5	4	8.43239	4.04113	2.08185	1.50467
chr8:142502291-142502565|MACS_peak_3252	14	9	5	5	8.43239	4.04113	2.08185	1.88084
chr7:438725-439054|MACS_peak_2709	14	10	5	6	8.43239	4.49015	2.08185	2.257
chr22:29590520-29590866|MACS_peak_2088	14	13	5	4	8.43239	5.83719	2.08185	1.50467
chr1:27362204-27362569|MACS_peak_36	14	14	5	1	8.43239	6.28621	2.08185	0.376167
chr8:145845267-145845602|MACS_peak_3395	14	1	4	2	8.43239	0.449015	1.66548	0.752335
chr19:55344383-55344675|MACS_peak_1489	14	2	4	2	8.43239	0.898029	1.66548	0.752335
chr4:42267762-42268066|MACS_peak_2311	14	2	4	3	8.43239	0.898029	1.66548	1.1285
chr18:9297079-9297379|MACS_peak_1160	14	3	4	1	8.43239	1.34704	1.66548	0.376167
chr2:47996353-47996624|MACS_peak_1603	14	3	4	8	8.43239	1.34704	1.66548	3.00934
chr19:36946670-36946961|MACS_peak_1338	14	4	4	3	8.43239	1.79606	1.66548	1.1285
chr19:37287771-37288125|MACS_peak_1365	14	4	4	5	8.43239	1.79606	1.66548	1.88084
chr1:44584387-44584757|MACS_peak_81	14	4	4	3	8.43239	1.79606	1.66548	1.1285
chr1:117650871-117651259|MACS_peak_137	14	4	4	4	8.43239	1.79606	1.66548	1.50467
chr16:81431994-81432284|MACS_peak_934	14	5	4	3	8.43239	2.24507	1.66548	1.1285
chr10:43333155-43333456|MACS_peak_271	14	5	4	6	8.43239	2.24507	1.66548	2.257
chr5:3050888-3051261|MACS_peak_2412	14	5	4	4	8.43239	2.24507	1.66548	1.50467
chr4:49163277-49163592|MACS_peak_2331	14	5	4	3	8.43239	2.24507	1.66548	1.1285
chr9:44877174-44877500|MACS_peak_3486	14	5	4	4	8.43239	2.24507	1.66548	1.50467
chr8:145892624-145892941|MACS_peak_3402	14	5	4	3	8.43239	2.24507	1.66548	1.1285
chr2:112978104-112978500|MACS_peak_1716	14	6	4	4	8.43239	2.69409	1.66548	1.50467
chr1:110521292-110521608|MACS_peak_123	14	6	4	4	8.43239	2.69409	1.66548	1.50467
chr19:3684488-3684766|MACS_peak_1259	14	7	4	1	8.43239	3.1431	1.66548	0.376167
chr2:122575094-122575447|MACS_peak_1737	14	7	4	5	8.43239	3.1431	1.66548	1.88084
chrX:100654838-100655160|MACS_peak_3567	14	7	4	1	8.43239	3.1431	1.66548	0.376167
chr2:238212269-238212591|MACS_peak_1791	14	8	4	2	8.43239	3.59212	1.66548	0.752335
chr1:33529825-33530155|MACS_peak_43	14	8	4	5	8.43239	3.59212	1.66548	1.88084
chr9:140726485-140726761|MACS_peak_3556	14	8	4	1	8.43239	3.59212	1.66548	0.376167
chr8:2212185-2212550|MACS_peak_3040	14	8	4	1	8.43239	3.59212	1.66548	0.376167
chr7:300316-300678|MACS_peak_2695	14	10	4	4	8.43239	4.49015	1.66548	1.50467
chr7:6679358-6679703|MACS_peak_2868	14	11	4	5	8.43239	4.93916	1.66548	1.88084
chr5:104034262-104034589|MACS_peak_2509	14	1	3	5	8.43239	0.449015	1.24911	1.88084
chr14:61777552-61777869|MACS_peak_648	14	2	3	9	8.43239	0.898029	1.24911	3.38551
chr7:35494590-35494905|MACS_peak_2919	14	2	3	0	8.43239	0.898029	1.24911	0
chr9:88705599-88705882|MACS_peak_3501	14	2	3	0	8.43239	0.898029	1.24911	0
chr17:19556814-19557119|MACS_peak_985	14	3	3	1	8.43239	1.34704	1.24911	0.376167
chr13:113843689-113843982|MACS_peak_593	14	3	3	5	8.43239	1.34704	1.24911	1.88084
chr11:100998838-100999143|MACS_peak_454	14	3	3	0	8.43239	1.34704	1.24911	0
chr7:56539403-56539700|MACS_peak_2965	14	3	3	2	8.43239	1.34704	1.24911	0.752335
chr5:3823200-3823552|MACS_peak_2416	14	3	3	5	8.43239	1.34704	1.24911	1.88084
[truncated: 1,086 more rows]
