# Supplementary figures and images for: The preRC protein ORCA organizes heterochromatin by assembling histone H3 lysine 9 methyltransferases on chromatin
Source: eLife journal article supplement (doi:10.7554/elife.06496), 2015-04-28

**A**

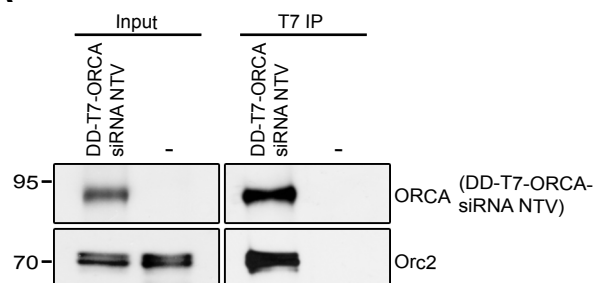

**B**

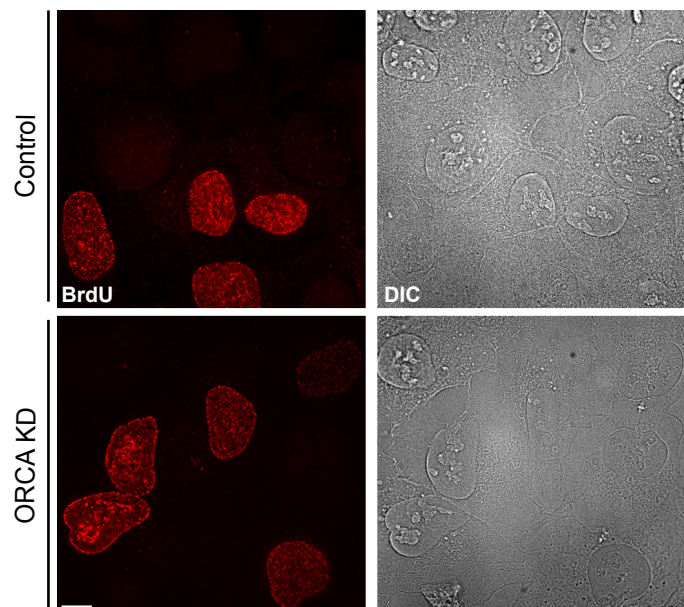

**C**

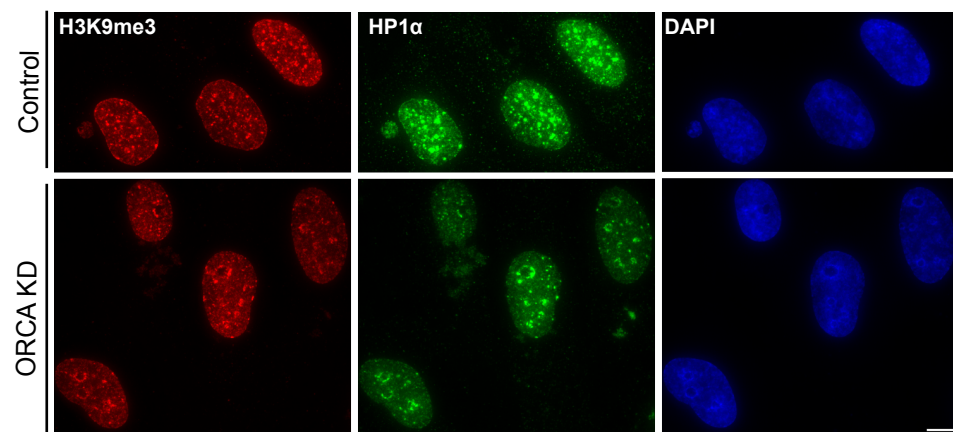

**D**

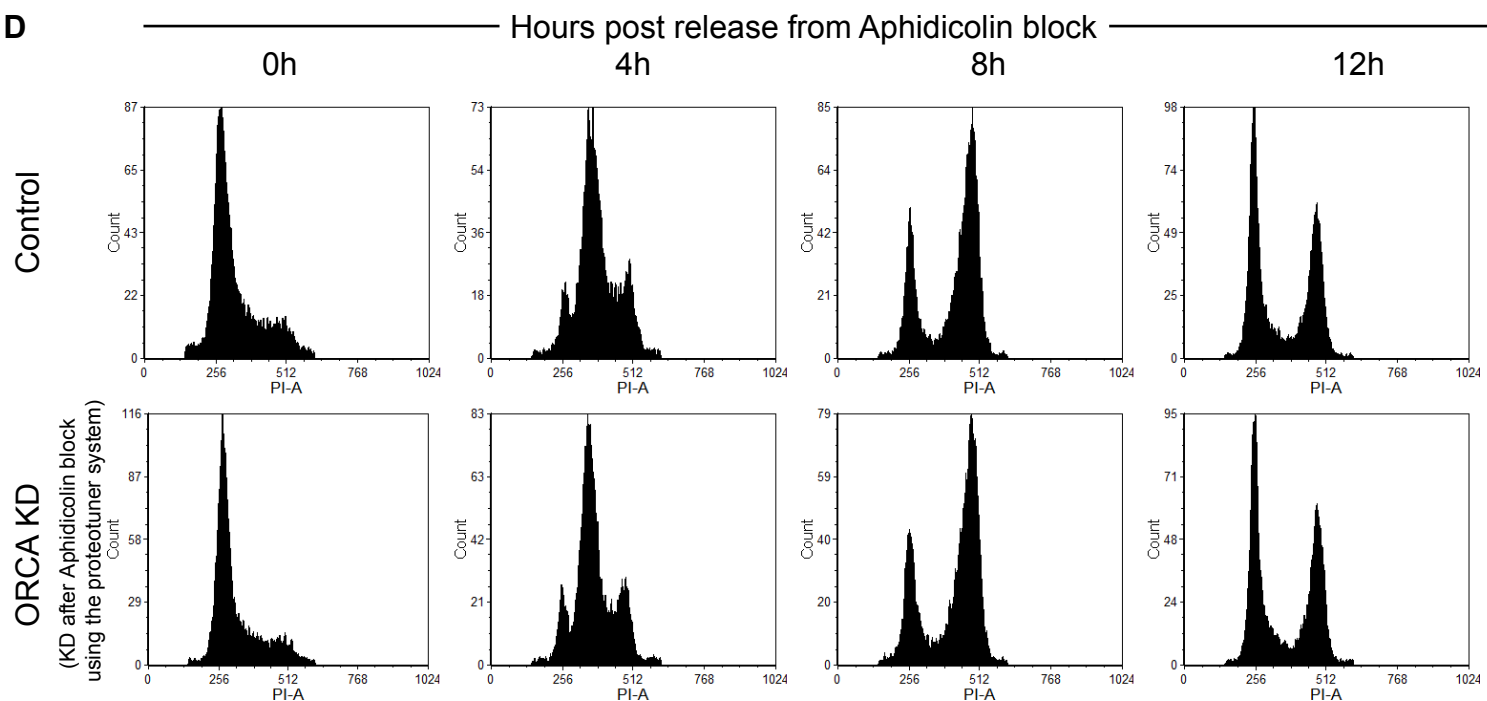

Supplement: supp [file elife-06496-supp-v1.zip]

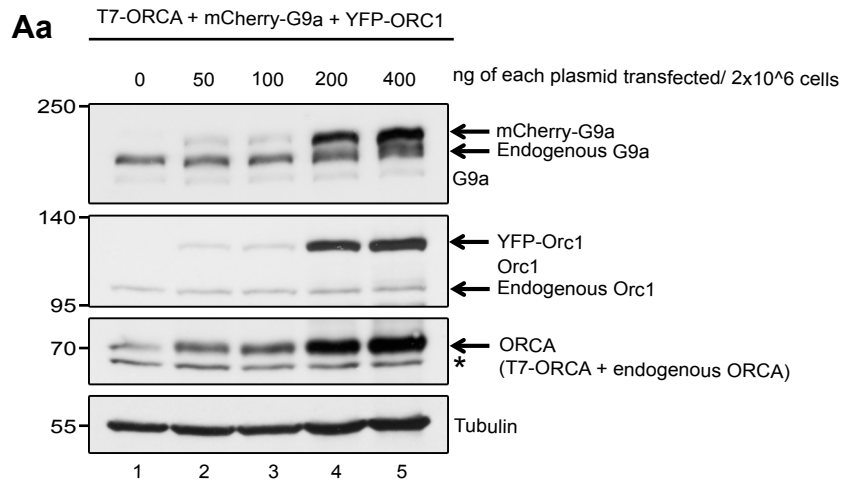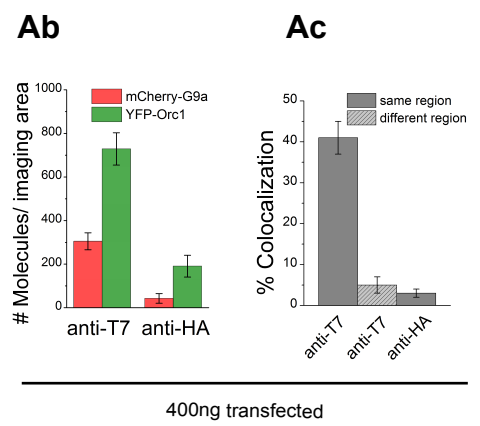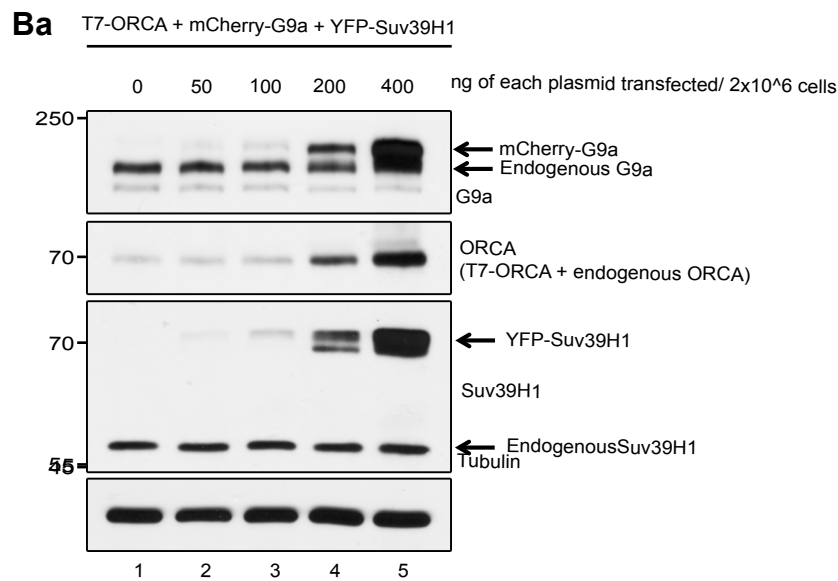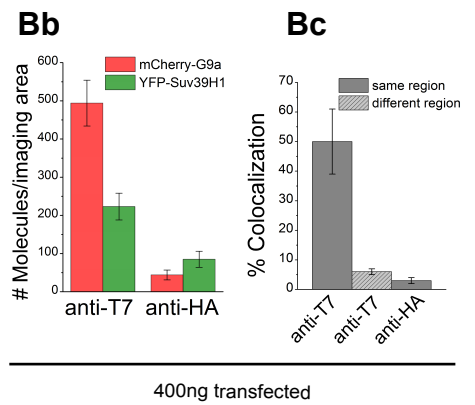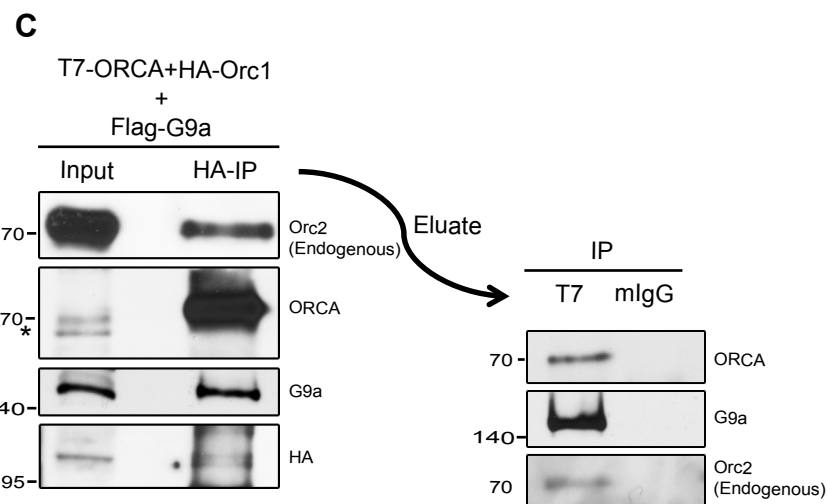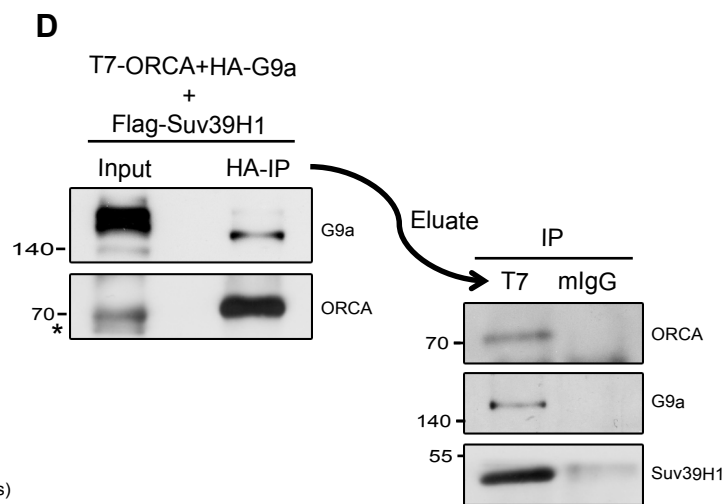

Supplement: supp [file elife-06496-supp-v1.zip]

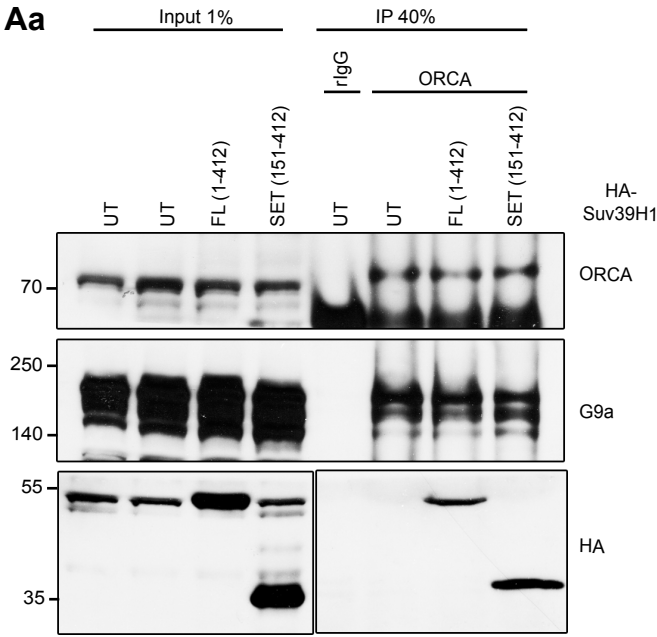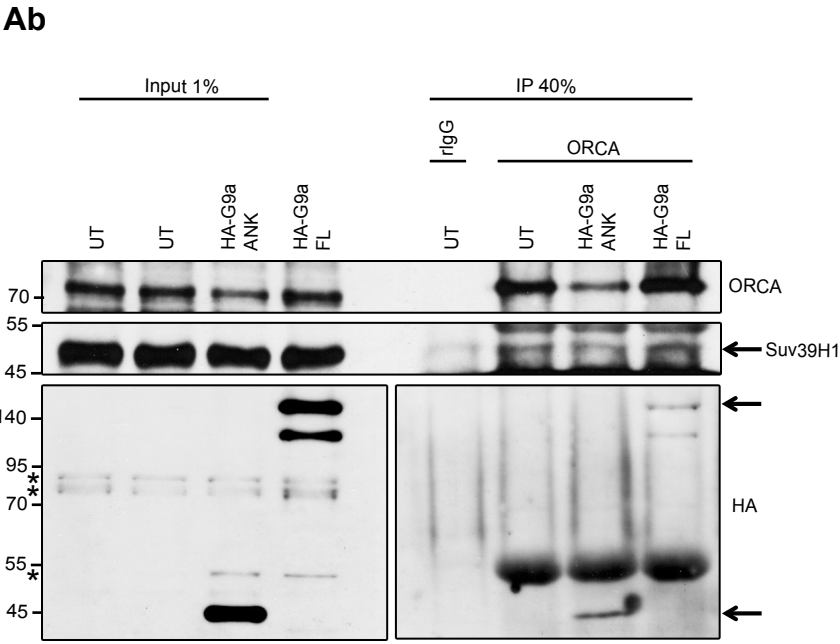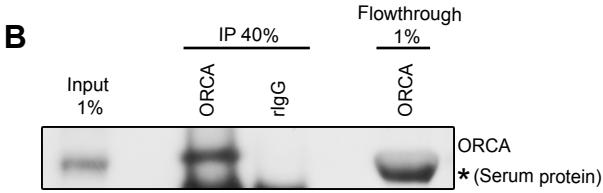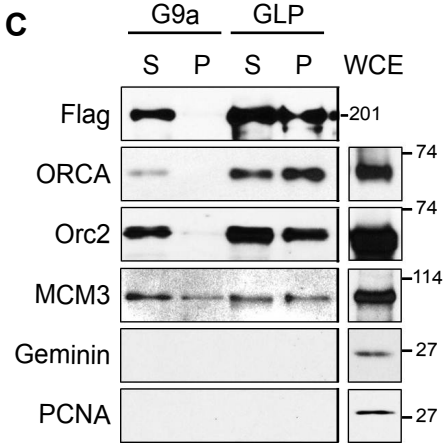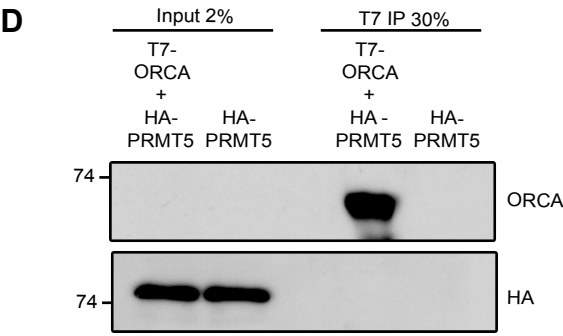

Supplement: supp [file elife-06496-supp-v1.zip]

# Giri\_Figure\_2\_figure\_supplement\_1

**Aa**

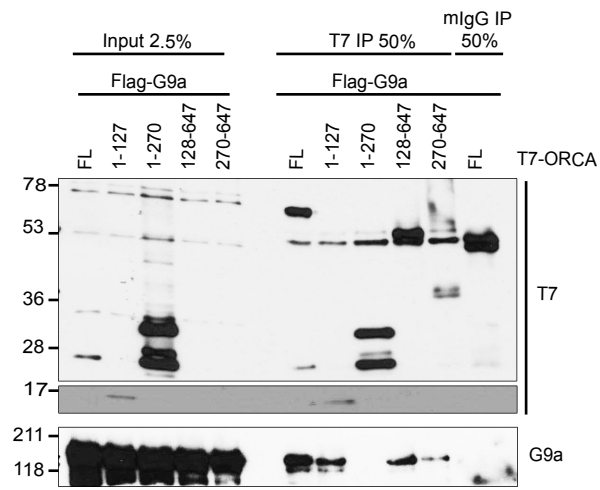

**Ab**

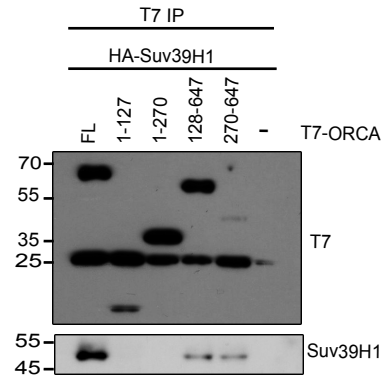

**Ba**

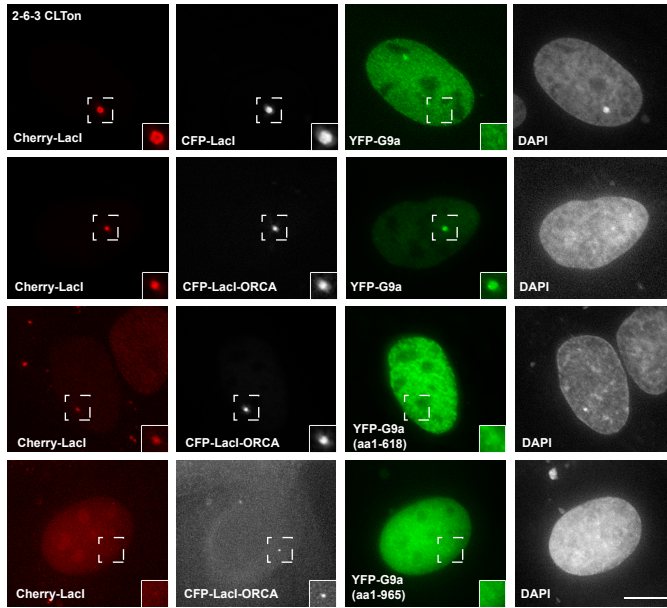

**Bb**

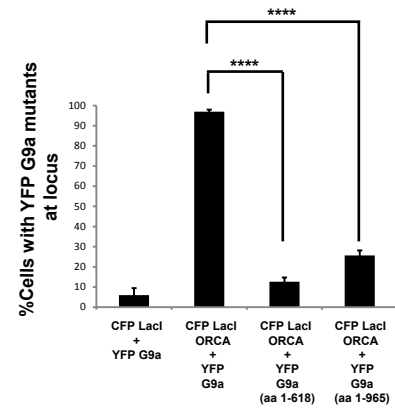

**C**

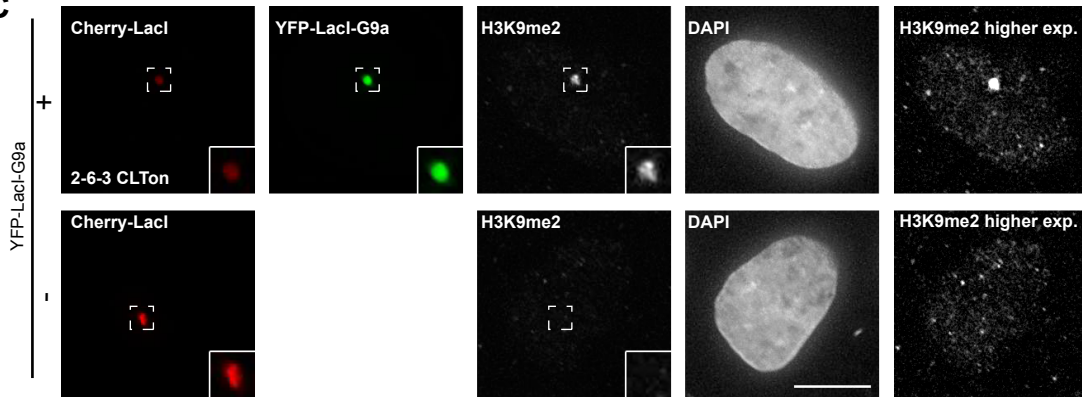

**D**

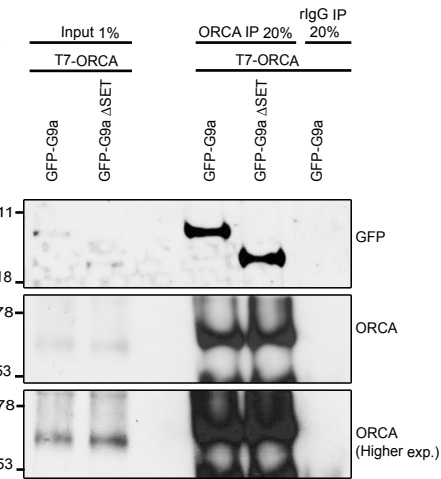

**E**

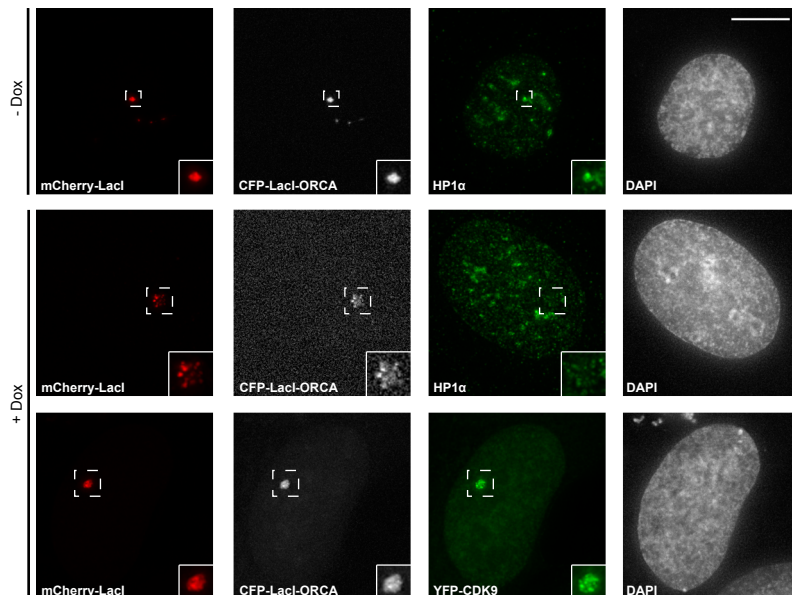

**F**

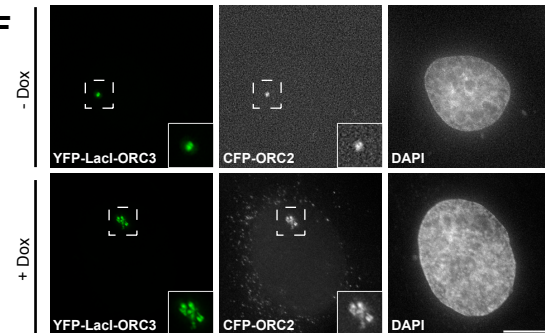

Supplement: supp [file elife-06496-supp-v1.zip]

# Giri\_Figure\_5\_figure\_supplement\_1

**Aa**

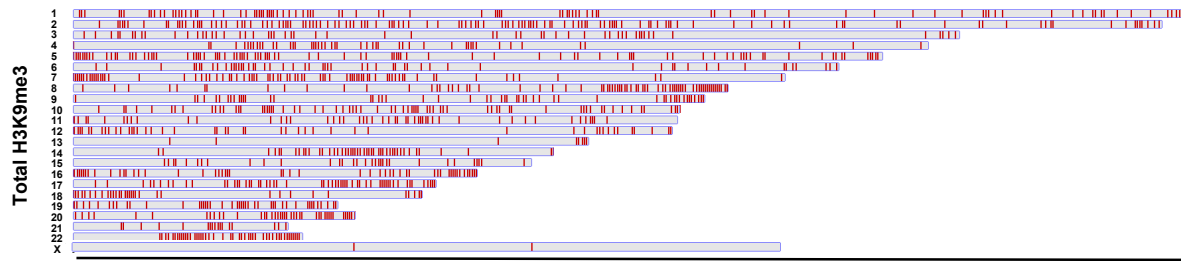

**Ab**

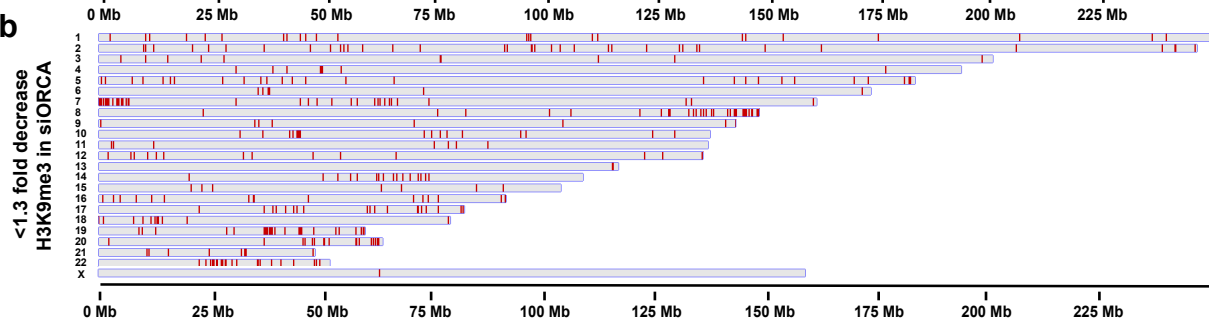

**Ba**

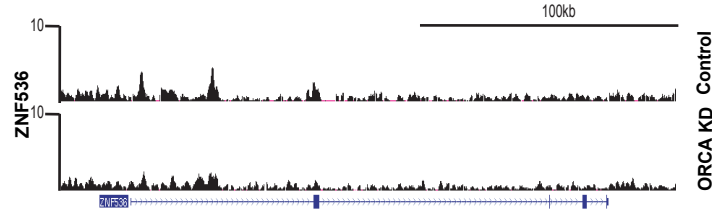

**Bb**

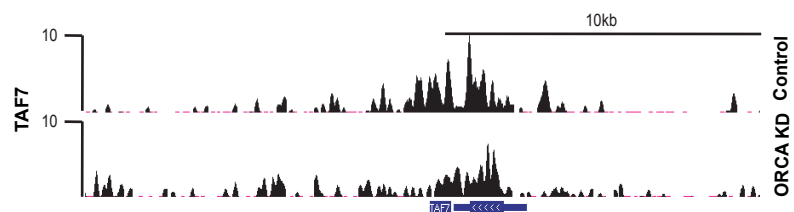

**Bc**

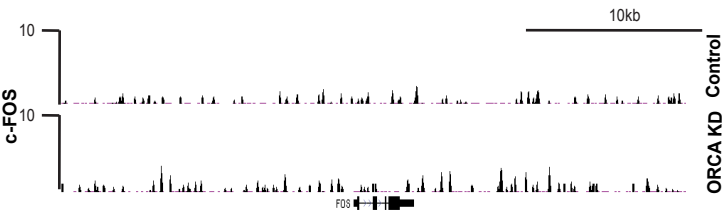

**Ca**

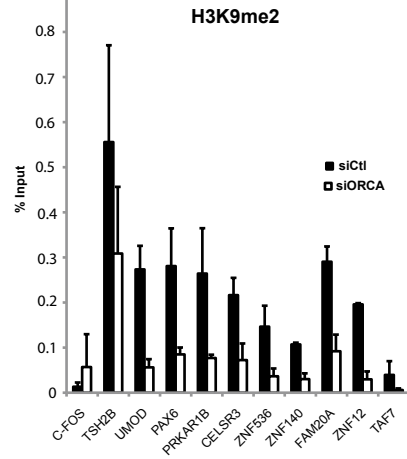

**Cb**

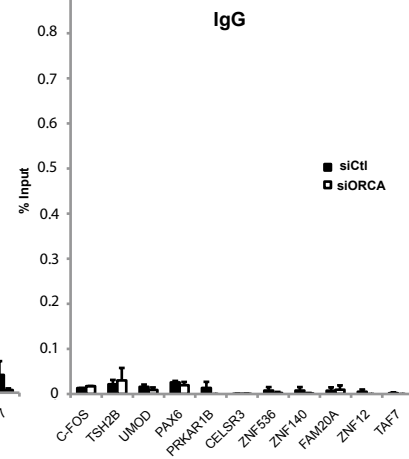

**D**

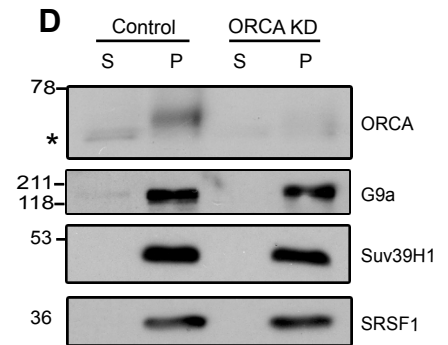

**Ea**

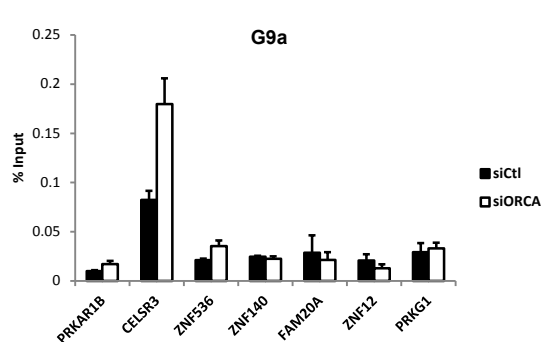

**Eb**

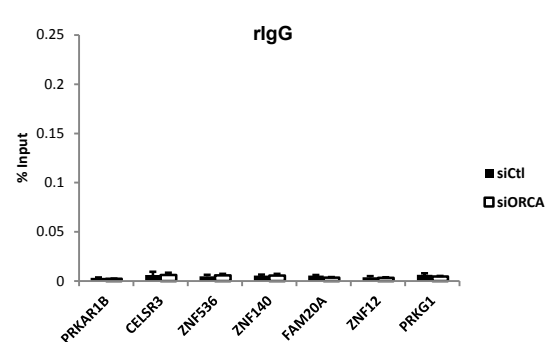

Supplement: supp [file elife-06496-supp-v1.zip]

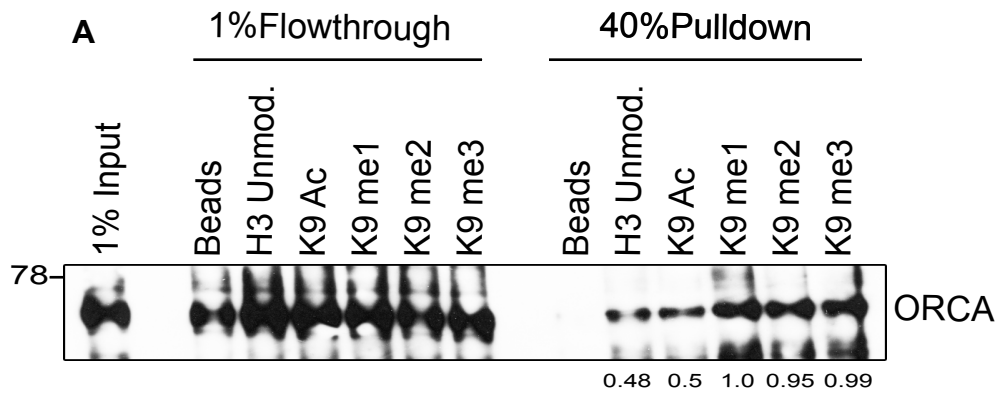

**Ba**

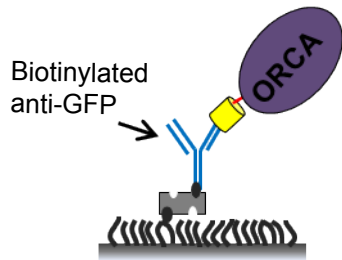

**Bb**

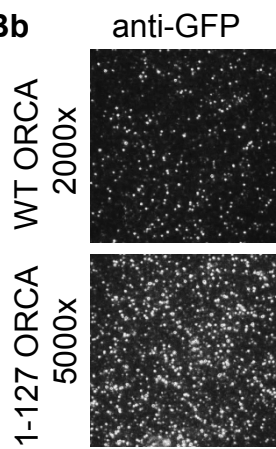

**Bc**

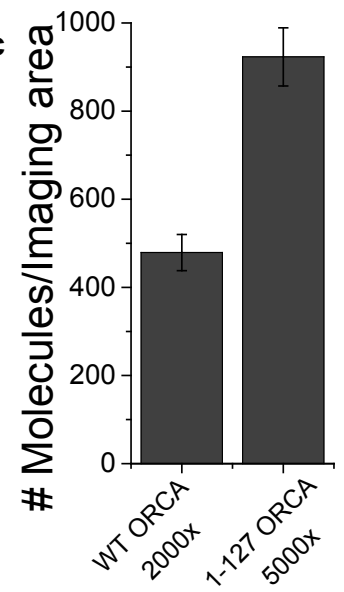

Supplement: supp [file elife-06496-supp-v1.zip]

# Giri\_Figure\_7\_figure\_supplement\_1

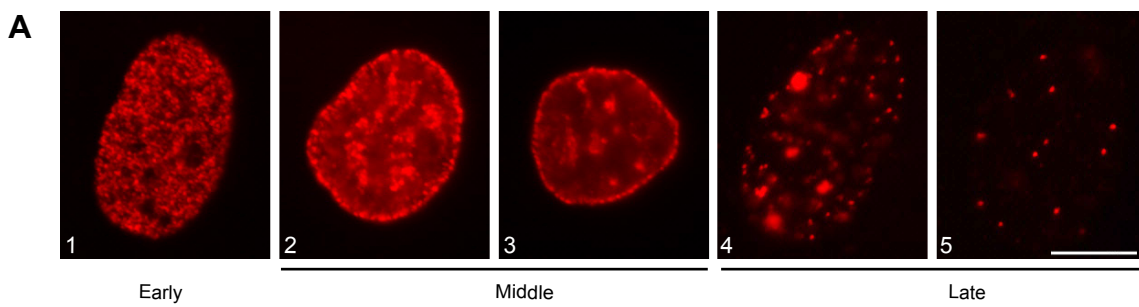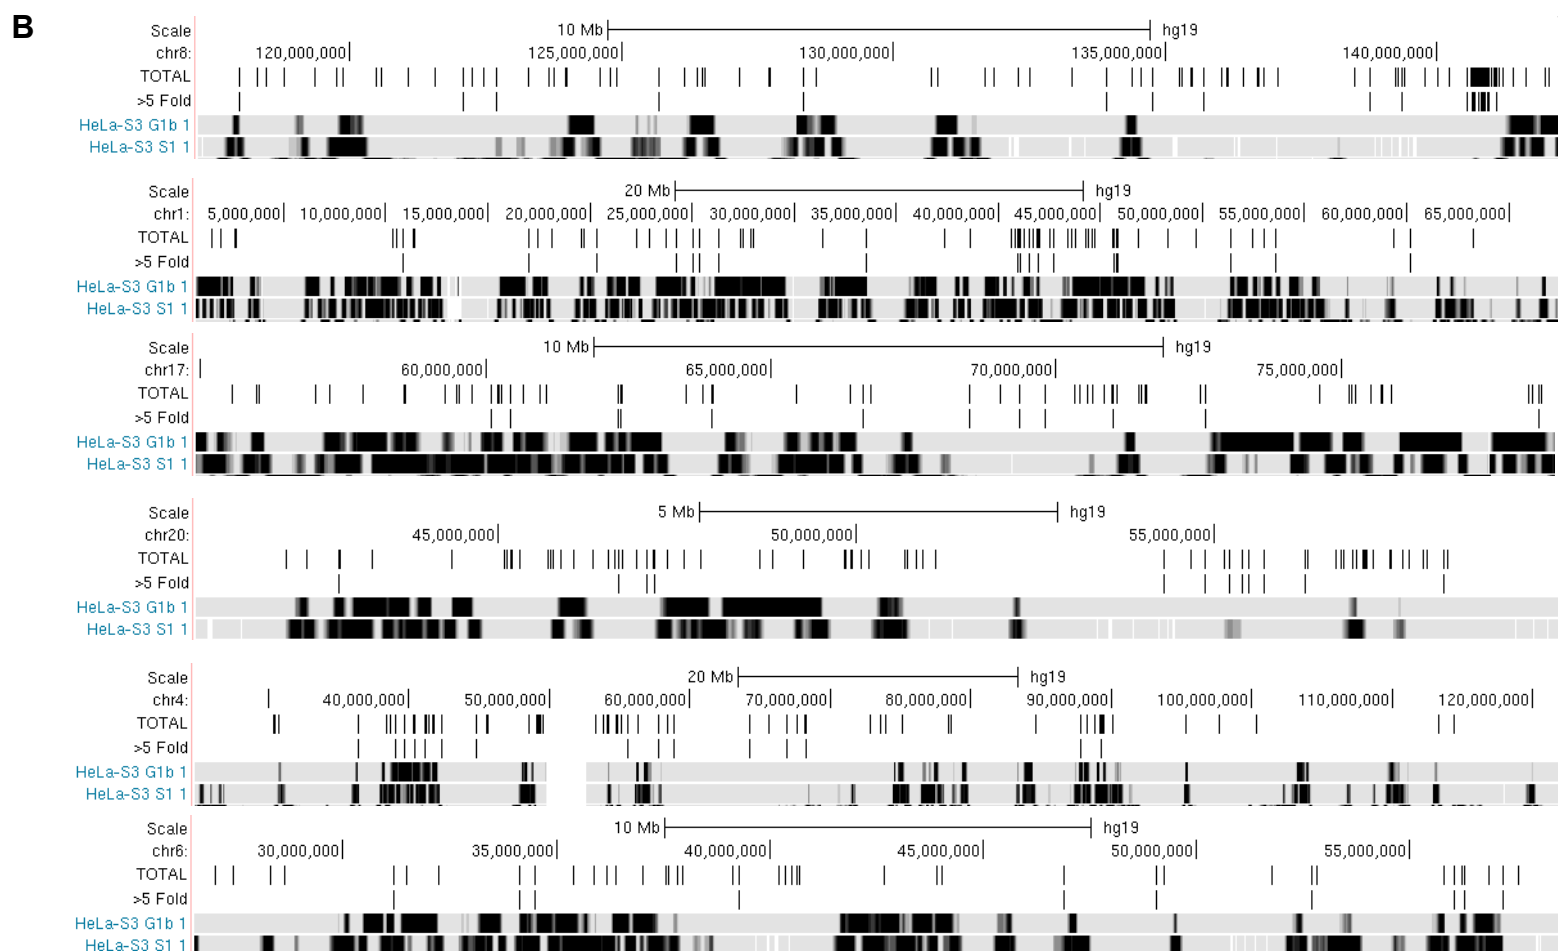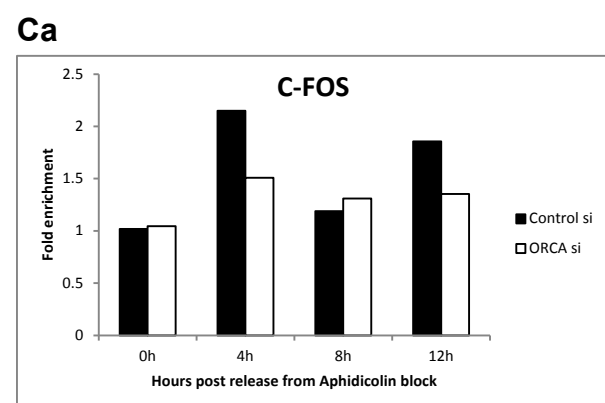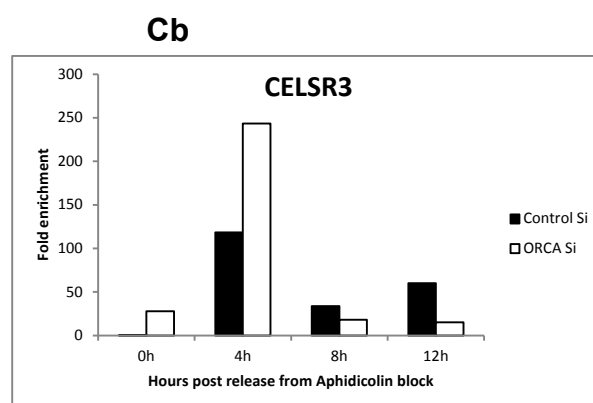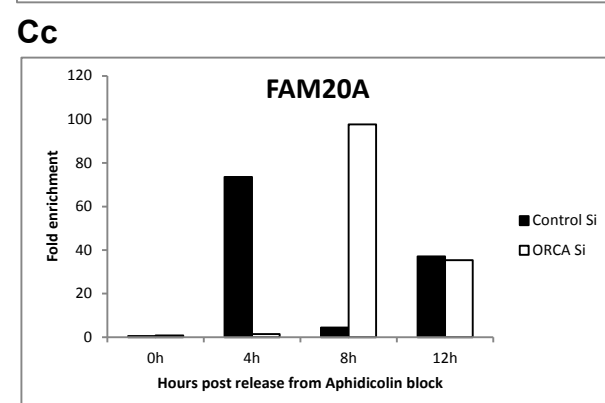

Supplement: supp [file elife-06496-supp-v1.zip]
